# Supplementary material
Source: PubMed Central journal article supplement (PMC419953)
Supplement: jbacter_186_12_3911__1.pdf [file jbacter_186_12_3911__1.pdf]

| Gene ID | b number | Gene name   | Function | Phophage | O157   | Sak    | EHEC   | EPEC-1 | EPEC-2 | EPEC-3 | EPEC-4 | EPEC-5 | EPEC-6 | EPEC-7 | ETEC-1 | ETEC-2 | EIEC-1 | EIEC-2 | EIEC-3 | EIEC-4 | UPEC-1 | UPEC-2 | UPEC-3 | REPEC  | S. flexneri | S. boydii | S. sonnei | Deleted at least in one strain | Common deletion | Conserved | Putatively duplicated |
|---------|----------|-------------|----------|----------|--------|--------|--------|--------|--------|--------|--------|--------|--------|--------|--------|--------|--------|--------|--------|--------|--------|--------|--------|--------|-------------|-----------|-----------|--------------------------------|-----------------|-----------|-----------------------|
| JW0001  | b0002    | thrA        | 1        |          | -0.229 | -0.151 | -0.068 | 0.245  | 0.213  | -0.439 | -0.160 | 0.043  | 0.088  | -0.184 | -0.118 | 0.008  | 0.011  | 0.057  | -0.021 | 0.190  | 0.098  | 0.086  | -0.166 | 0.018  | 0.002       | -0.039    |           |                                |                 | 1         |                       |
| JW0002  | b0003    | thrB        | 1        |          | -0.101 | 0.004  | -0.110 | -0.066 | -0.217 | -0.085 | -0.189 | -0.354 | -0.050 | -0.195 | -0.059 | -0.233 | -0.145 | -0.127 | -0.173 | -0.208 | -0.237 | -0.066 | -0.205 | -0.120 | -0.202      |           |           |                                | 1               |           |                       |
| JW0003  | b0004    | thrC        | 1        |          | 0.117  | 0.033  | 0.157  | 0.196  | 0.125  | 0.124  | 0.063  | 0.231  | 0.079  | -0.105 | -0.086 | -0.040 | 0.129  | 0.136  | 0.079  | 0.039  | 0.249  | 0.043  | 0.071  | 0.174  | 0.035       | -0.005    |           |                                |                 | 1         |                       |
| JW0004  | b0005    | 101#4       | 15       |          | -0.342 | -0.354 | -0.238 | -0.287 | -0.646 | -0.151 | -0.134 | -0.036 | -0.478 | -0.380 | -0.102 | -0.053 | 0.064  | 0.091  | 0.076  | -0.452 | -0.472 | -0.270 | -0.269 | 0.072  | -0.525      | 0.068     |           |                                |                 | 1         |                       |
| JW0005  | b0006    | yaaA        | 15       |          | -0.133 | 0.008  | 0.105  | 0.112  | 0.041  | -0.119 | -0.001 | 0.109  | 0.191  | -0.200 | -0.066 | 0.145  | -0.059 | -0.212 | 0.036  | 0.049  | 0.257  | 0.163  | 0.074  | 0.113  | 0.138       | 0.143     |           |                                |                 | 1         |                       |
| JW0006  | b0007    | yaaJ        | 15       |          | -0.187 | -0.153 | -0.002 | 0.057  | -0.018 | 0.020  | -0.060 | 0.037  | 0.048  | -0.179 | -0.228 | 0.007  | -0.087 | 0.083  | 0.036  | -0.061 | -0.004 | 0.047  | -0.160 | 0.029  | 0.031       | 0.071     |           |                                |                 | 1         |                       |
| JW0007  | b0008    | talB        | 5        |          | 0.012  | 0.132  | 0.205  | 0.287  | 0.352  | 0.042  | 0.117  | 0.314  | 0.263  | 0.049  | 0.063  | 0.157  | 0.169  | 0.199  | 0.147  | 0.306  | 0.356  | 0.392  | 0.123  | 0.099  | 0.264       | 0.181     |           |                                |                 | 1         |                       |
| JW0008  | b0009    | mog         | 2        |          | 0.347  | -0.062 | 0.201  | 0.292  | 0.364  | 0.073  | 0.077  | 0.332  | 0.235  | -0.252 | -0.199 | 0.134  | 0.039  | 0.102  | 0.062  | 0.273  | 0.314  | 0.312  | 0.189  | 0.045  | 0.248       | -0.031    |           |                                |                 | 1         |                       |
| JW0009  | b0010    | yaaH        | 15       |          | 0.162  | 0.233  | 0.251  | 0.309  | 0.407  | 0.040  | 0.242  | 0.291  | 0.326  | 0.150  | 0.107  | 0.094  | 0.192  | 0.173  | 0.174  | 0.287  | 0.396  | 0.411  | 0.228  | 0.168  | 0.281       | 0.313     |           |                                |                 | 1         |                       |
| JW0010  | b0011    | 102#2.1     | 15       |          | -0.071 | -0.065 | -0.010 | -0.111 | -0.161 | 0.044  | 0.121  | -0.083 | -0.122 | -0.313 | -0.254 | -0.099 | -0.010 | -0.041 | -0.122 | -0.122 | -0.072 | -0.044 | -0.103 | 0.081  | -0.068      | -0.070    |           |                                |                 | 1         |                       |
| JW0011  | b0012    | htgA        | 14       |          | -0.490 | -0.070 | 0.128  | 0.002  | -0.245 | -0.145 | -0.132 | -0.067 | -0.045 | -0.320 | -0.135 | -0.037 | -0.117 | -0.345 | -0.114 | -0.106 | 0.002  | -0.044 | 0.023  | 0.062  | -0.023      | -0.084    |           |                                |                 | 1         |                       |
| JW0012  | b0013    | yaaI        | 15       |          | -0.054 | -0.007 | -0.056 | 0.054  | -0.085 | 0.044  | -0.161 | 0.092  | -0.049 | -0.009 | 0.142  | 0.068  | -0.010 | -0.051 | -0.022 | 0.144  | 0.131  | 0.282  | -0.118 | 0.186  | 0.055       | 0.187     |           |                                |                 | 1         |                       |
| JW0013  | b0014    | dnaK        | 4        |          | 0.036  | 0.014  | 0.095  | 0.217  | 0.193  | 0.085  | 0.063  | 0.281  | 0.169  | -0.032 | -0.012 | 0.096  | 0.117  | 0.195  | 0.086  | 0.334  | 0.239  | 0.276  | 0.016  | 0.183  | 0.077       | 0.159     |           |                                |                 | 1         |                       |
| JW0014  | b0015    | dnaJ        | 4        |          | -0.005 | 0.045  | 0.134  | 0.211  | 0.168  | -0.031 | 0.087  | 0.249  | 0.178  | 0.001  | -0.038 | 0.006  | 0.040  | 0.126  | 0.056  | 0.243  | 0.224  | 0.214  | 0.085  | 0.126  | 0.159       | 0.153     |           |                                |                 | 1         |                       |
| JW0017  | b0018    | hokC / gefL | 4        |          | 0.019  | 0.338  | 0.249  | 0.348  | 0.403  | 0.233  | 0.159  | 0.497  | 0.679  | 0.037  | 0.026  | 0.568  | 0.294  | 0.029  | 0.165  | 0.208  | 0.393  | 0.548  | 0.453  | 0.287  | 0.428       | 0.417     |           |                                |                 | 1         |                       |
| JW0018  | b0019    | rhaA        | 11       |          | -0.230 | -0.137 | -0.102 | -0.296 | -0.801 | -0.141 | -0.064 | -0.688 | -0.724 | -0.123 | -0.146 | 0.159  | -0.051 | 0.143  | 0.053  | -0.767 | -0.728 | -0.892 | -0.171 | 0.238  | 0.228       | 0.162     |           |                                |                 | 1         |                       |
| JW0019  | b0020    | rhaR        | 11       |          | 0.021  | 0.173  | 0.246  | -0.419 | -1.624 | -0.193 | 0.148  | -1.710 | -1.678 | -0.305 | -0.110 | 0.086  | -0.074 | 0.007  | -0.064 | -1.709 | -1.744 | -0.007 | 0.172  | 0.233  | -0.045      | 0.246     |           | 1                              |                 |           | 1                     |
| JW0022  | b0023    | rpsT        | 12       |          | -0.002 | 0.139  | 0.374  | 0.333  | 0.410  | -0.119 | 0.031  | 0.372  | 0.477  | 0.119  | 0.175  | 0.368  | 0.187  | 0.153  | 0.076  | 0.514  | 0.634  | 0.587  | 0.267  | 0.280  | 0.372       | 0.265     |           |                                |                 | 1         |                       |
| JW0023  | b0025    | rifB        | 8        |          | -0.051 | -0.037 | 0.044  | 0.035  | -0.093 | -0.018 | -0.140 | -0.171 | -0.218 | -0.102 | -0.106 | 0.042  | 0.081  | 0.093  | 0.029  | -0.120 | -0.058 | -0.087 | -0.048 | 0.047  | 0.052       | 0.043     |           |                                |                 | 1         |                       |
| JW0024  | b0026    | ileS        | 12       |          | -0.155 | -0.062 | 0.096  | 0.099  | -0.010 | -0.211 | -0.034 | 0.033  | -0.017 | -0.101 | -0.055 | 0.075  | 0.017  | 0.017  | 0.039  | -0.144 | -0.014 | -0.045 | 0.121  | -0.033 | 0.102       | 0.071     |           |                                |                 | 1         |                       |
| JW0025  | b0027    | lspA        | 4        |          | 0.347  | 0.204  | 0.299  | 0.316  | 0.259  | 0.054  | 0.069  | 0.320  | 0.147  | -0.044 | 0.050  | 0.115  | 0.113  | 0.126  | 0.032  | 0.353  | 0.382  | 0.415  | 0.257  | 0.177  | 0.215       | 0.144     |           |                                |                 | 1         |                       |
| JW0026  | b0028    | fkpB / slpA | 1        |          | 0.045  | 0.117  | 0.223  | 0.322  | 0.293  | -0.026 | 0.108  | 0.278  | 0.172  | -0.094 | -0.114 | -0.013 | 0.069  | 0.048  | 0.046  | 0.295  | 0.173  | 0.230  | 0.188  | 0.006  | 0.108       | -0.015    |           |                                |                 | 1         |                       |
| JW0027  | b0029    | lytB        | 14       |          | -0.127 | 0.015  | 0.114  | -0.036 | -0.275 | -0.230 | 0.090  | -0.134 | -0.292 | -0.205 | -0.189 | -0.175 | -0.062 | 0.011  | -0.069 | -0.177 | -0.044 | -0.075 | -0.010 | -0.092 | 0.102       | 0.017     |           |                                |                 | 1         |                       |
| JW0028  | b0030    | yaaF        | 8        |          | -0.400 | 0.056  | -0.202 | -0.388 | -0.727 | -0.926 | -0.284 | -0.577 | -0.479 | -0.607 | -0.517 | -0.315 | -0.472 | -0.687 | -0.413 | -0.582 | -0.297 | -0.476 | -0.139 | -0.404 | -0.469      | -0.336    |           |                                |                 | 1         |                       |
| JW0029  | b0031    | dapB        | 1        |          | -0.163 | -0.191 | -0.115 | -0.195 | -0.133 | -0.383 | -0.217 | -0.181 | -0.141 | -0.348 | -0.299 | -0.124 | -0.251 | -0.206 | -0.236 | -0.163 | -0.090 | -0.078 | -0.095 | -0.036 | -0.103      | -0.106    |           |                                |                 | 1         |                       |
| JW0030  | b0032    | carA        | 8        |          | 0.050  | -0.037 | 0.005  | 0.063  | 0.019  | -0.020 | 0.013  | -0.045 | -0.013 | 0.012  | -0.179 | -0.114 | 0.001  | 0.039  | -0.046 | -0.082 | 0.040  | -0.069 | -0.004 | 0.063  | 0.080       | 0.052     |           |                                |                 | 1         |                       |
| JW0031  | b0033    | carB        | 8        |          | -0.159 | -0.191 | -0.056 | 0.024  | -0.089 | -0.328 | -0.159 | -0.055 | -0.092 | -0.105 | -0.189 | 0.021  | -0.147 | -0.127 | -0.103 | -0.228 | -0.155 | -0.147 | -0.022 | -0.063 | 0.012       | -0.072    |           |                                |                 | 1         |                       |
| JW0033  | b0034    | caif        | 7        |          | 0.276  | -0.098 | -0.141 | -0.201 | -0.158 | 0.007  | -0.067 | -0.188 | -0.091 | -0.101 | 0.014  | 0.009  | 0.007  | 0.060  | 0.049  | -0.092 | -0.021 | 0.030  | -0.139 | 0.151  | 0.283       | -0.003    |           |                                |                 | 1         |                       |
| JW0034  | b0035    | caie        | 7        |          | -0.083 | -0.045 | 0.096  | -0.166 | -0.166 | -0.257 | 0.070  | -0.122 | -0.129 | -0.223 | -0.221 | -0.235 | -0.002 | -0.064 | -0.068 | -0.081 | -0.022 | -0.036 | -0.024 | -0.005 | 0.002       | 0.078     |           |                                |                 | 1         |                       |
| JW0035  | b0036    | caid        | 7        |          | -0.321 | -0.208 | 0.089  | -0.011 | -0.117 | -0.411 | -0.214 | 0.062  | 0.067  | -0.340 | -0.169 | -0.099 | -0.247 | -0.444 | -0.259 | -0.078 | 0.074  | 0.062  | -0.095 | 0.013  | -0.068      | -0.143    |           |                                |                 | 1         |                       |
| JW0036  | b0037    | caic        | 1        |          | -0.045 | -0.137 | -0.048 | -0.107 | -0.054 | -0.334 | -0.124 | -0.036 | -0.058 | -0.231 | -0.203 | -0.043 | -0.110 | -0.039 | -0.132 | -0.112 | -0.040 | -0.032 | -0.167 | -0.137 | -0.069      | -0.097    |           |                                |                 | 1         |                       |
| JW0037  | b0038    | caib        | 7        |          | -0.018 | 0.004  | -0.036 | 0.014  | -0.088 | -0.094 | 0.026  | 0.017  | -0.025 | 0.093  | 0.018  | 0.150  | 0.042  | 0.128  | 0.014  | 0.006  | 0.076  | 0.006  | -0.102 | 0.066  | 0.092       | 0.082     |           |                                |                 | 1         |                       |
| JW0038  | b0039    | caia        | 7        |          | 0.195  | 0.089  | 0.234  | 0.084  | 0.065  | 0.001  | 0.170  | 0.072  | 0.060  | -0.042 | -0.065 | 0.006  | 0.025  | 0.107  | 0.062  | 0.055  | 0.117  | 0.065  | 0.177  | 0.114  | 0.141       | 0.167     |           |                                |                 | 1         |                       |
| JW0039  | b0040    | caiT        | 7        |          | -0.051 | 0.105  | 0.101  | 0.173  | 0.070  | -0.030 | 0.015  | 0.090  | 0.058  | 0.033  | -0.080 | 0.170  | 0.178  | 0.195  | 0.174  | 0.165  | 0.136  | 0.163  | 0.015  | -0.002 | 0.206       | 0.222     |           |                                |                 | 1         |                       |
| JW0040  | b0041    | fixA        | 7        |          | 0.232  | 0.073  | 0.230  | 0.158  | 0.135  | 0.002  | 0.123  | 0.145  | 0.151  | 0.070  | 0.087  | 0.058  | 0.171  | 0.208  | 0.142  | 0.268  | 0.286  | 0.248  | 0.114  | 0.136  | 0.172       | 0.060     |           |                                |                 | 1         |                       |
| JW0041  | b0042    | fixB        | 7        |          | 0.121  | 0.146  | 0.268  | 0.124  | -0.019 | 0.021  | 0.181  | 0.008  | -0.023 | 0.066  | 0.037  | -0.103 | 0.203  | 0.179  | 0.150  | 0.015  | 0.068  | 0.071  | 0.158  | -0.022 | 0.042       | 0.114     |           |                                |                 | 1         |                       |
| JW0042  | b0043    | fixC        | 7        |          | -0.156 | -0.239 | -0.094 | -0.006 | 0.054  | 0.102  | -0.115 | 0.056  | 0.029  | -0.007 | -0.279 | -0.265 | -0.156 | -0.078 | -0.195 | 0.004  | 0.022  | -0.029 | -0.228 | -0.198 | -0.258      | -0.291    |           |                                |                 | 1         |                       |
| JW0043  | b0044    | fixX        | 6        |          | -0.248 | -0.110 | 0.057  | -0.023 | 0.205  | -0.126 | -0.134 | 0.157  | 0.298  | -0.111 | -0.114 | 0.179  | -0.089 | -0.465 | -0.136 | 0.131  | 0.343  | 0.186  | -0.056 | 0.136  | -0.827      | -0.038    |           |                                |                 | 1         |                       |
| JW0044  | b0045    | yaaU        | 11       |          | -0.187 | -0.166 | -0.239 | -0.148 | -0.053 | -0.014 | -0.212 | -0.054 | 0.007  | -0.057 | -0.251 | 0.005  | -0.154 | -0.063 | -0.105 | -0.136 | 0.021  | -0.060 | -0.202 | -0.060 | -0.094      | -0.032    |           |                                |                 | 1         |                       |
| JW0045  | b0046    | yabF        | 6        |          | 0.217  | 0.056  | 0.026  | 0.040  | 0.158  | 0.030  | -0.088 | 0.077  | 0.042  | -0.165 | -0.145 | 0.000  | 0.007  | -0.052 | -0.079 | -0.081 | 0.089  | 0.018  | -0.004 | 0.008  | 0.088       | -0.003    |           |                                |                 | 1         |                       |
| JW0046  | b0047    | kefC        | 11       |          | -0.164 | 0.012  | 0.098  | -0.060 | -0.132 | 0.071  | 0.113  | -0.085 | -0.091 | 0.023  | -0.020 | -0.040 | 0.095  | 0.095  | 0.019  | -0.109 | 0.005  | -0.129 | 0.003  | -0.078 | -0.078      | 0.160     |           |                                |                 | 1         |                       |
| JW0047  | b0048    | foiA        | 2        |          | -0.585 | 0.010  | 0.115  | -0.053 | -0.227 | -0.143 | -0.105 | -0.238 | 0.050  | 0.068  | 0.140  | 0.183  | 0.054  | -0.670 | -0.439 | -0.192 | 0.013  | -0.127 | -0.063 | -0.408 | 0.129       | 0.158     |           |                                |                 | 1         |                       |
| JW0048  | b0049    | apaH        | 8        |          | -0.255 | -0.163 | -0.044 | 0.030  | -0.098 | -0.132 | -0.174 | 0.036  | 0.057  | 0.095  | 0.034  | 0.032  | -0.025 | 0.040  | 0.004  | 0.098  | 0.170  | 0.182  | -0.129 | -0.057 | 0.198       | 0.120     |           |                                |                 | 1         |                       |
| JW0049  | b00      |             |          |          |        |        |        |        |        |        |        |        |        |        |        |        |        |        |        |        |        |        |        |        |             |           |           |                                |                 |           |                       |

|        |       |      |    |         |         |         |         |         |         |         |         |         |         |         |         |         |         |         |         |         |         |         |         |         |         |   |
|--------|-------|------|----|---------|---------|---------|---------|---------|---------|---------|---------|---------|---------|---------|---------|---------|---------|---------|---------|---------|---------|---------|---------|---------|---------|---|
| JW0091 | b0093 | ftsQ | 4  | 0.220   | 0.052   | 0.217   | 0.137   | 0.176   | 0.037   | 0.114   | 0.150   | 0.188   | -0.033  | 0.050   | 0.142   | 0.111   | 0.148   | 0.060   | 0.232   | 0.308   | 0.220   | 0.094   | 0.097   | 0.146   | 0.195   | 1 |
| JW0092 | b0094 | ftsA | 4  | 0.086   | 0.007   | 0.100   | 0.081   | 0.093   | 0.024   | 0.140   | 0.129   | 0.168   | 0.019   | 0.023   | 0.016   | 0.067   | 0.121   | 0.094   | 0.225   | 0.253   | 0.195   | -0.011  | 0.123   | 0.059   | 0.060   | 1 |
| JW0093 | b0095 | ftsZ | 4  | 0.099   | 0.086   | 0.209   | 0.117   | 0.255   | -0.066  | 0.232   | 0.099   | 0.345   | 0.033   | -0.062  | -0.097  | 0.145   | 0.167   | 0.141   | 0.222   | 0.311   | 0.310   | 0.062   | 0.204   | 0.253   | 0.162   | 1 |
| JW0094 | b0096 | lpxC | 3  | -0.252  | 0.100   | 0.230   | 0.134   | -0.045  | -0.272  | 0.042   | 0.377   | 0.389   | 0.072   | 0.148   | 0.266   | 0.121   | -0.098  | -0.030  | 0.408   | 0.500   | 0.550   | 0.229   | 0.247   | 0.313   | 0.202   | 1 |
| JW0095 | b0097 | yacA | 15 | -0.131  | 0.220   | 0.341   | 0.116   | -0.001  | -0.065  | 0.040   | -0.116  | 0.094   | 0.086   | -0.057  | 0.195   | 0.146   | 0.213   | 0.114   | 0.125   | 0.149   | 0.086   | 0.196   | 0.136   | 0.004   | 0.238   | 1 |
| JW0096 | b0098 | secA | 4  | -0.078  | 0.051   | 0.161   | 0.102   | -0.126  | -0.135  | -0.041  | 0.025   | 0.044   | 0.023   | 0.087   | 0.251   | 0.035   | 0.116   | 0.090   | 0.081   | 0.107   | 0.022   | 0.083   | 0.144   | 0.140   | 0.110   | 1 |
| JW0097 | b0099 | mutT | 8  | 0.111   | -0.011  | -0.199  | -0.084  | 0.204   | -0.068  | -0.156  | 0.111   | 0.092   | -0.199  | -0.025  | 0.091   | -0.172  | -0.098  | -0.112  | 0.082   | 0.203   | 0.148   | -0.150  | -0.037  | -0.051  | -0.015  | 1 |
| JW0099 | b0102 | yacF | 15 | 0.205   | 0.143   | 0.178   | 0.084   | 0.131   | 0.100   | 0.116   | 0.134   | 0.112   | 0.006   | -0.011  | 0.164   | 0.209   | 0.237   | 0.115   | 0.100   | 0.215   | 0.150   | 0.155   | 0.198   | 0.076   | 0.222   | 1 |
| JW0100 | b0103 | yacE | 15 | 0.087   | 0.138   | 0.119   | -0.017  | 0.184   | 0.015   | 0.100   | 0.076   | 0.121   | -0.018  | -0.059  | -0.056  | 0.062   | 0.111   | 0.044   | 0.165   | 0.218   | 0.239   | 0.122   | 0.157   | 0.077   | 0.161   | 1 |
| JW0101 | b0104 | guaC | 8  | 0.187   | 0.064   | -0.002  | -0.069  | 0.136   | 0.016   | 0.076   | 0.064   | 0.125   | -0.018  | -0.002  | -0.044  | 0.038   | 0.034   | -0.047  | 0.139   | 0.225   | 0.145   | 0.019   | 0.028   | 0.029   | 0.145   | 1 |
| JW0102 | b0106 | hofC | 11 | -0.045  | -0.019  | 0.003   | 0.036   | -0.240  | -0.111  | -0.074  | -0.149  | -0.126  | 0.139   | 0.084   | 0.188   | -0.001  | 0.002   | 0.032   | 0.050   | 0.079   | 0.094   | -0.055  | 0.087   | 0.016   | 0.071   | 1 |
| JW0103 | b0107 | hofB | 11 | -0.205  | 0.062   | 0.153   | 0.030   | -0.237  | 0.001   | 0.057   | -0.110  | -0.151  | 0.176   | 0.059   | 0.217   | 0.143   | 0.184   | 0.110   | 0.076   | 0.011   | 0.059   | 0.059   | -0.443  | 0.112   | -0.078  | 1 |
| JW0104 | b0108 | ppdD | 14 | 0.143   | 0.180   | 0.026   | 0.095   | 0.169   | -0.008  | 0.077   | 0.160   | 0.218   | 0.081   | 0.037   | 0.082   | 0.048   | 0.070   | 0.029   | 0.383   | 0.285   | 0.302   | -0.064  | 0.103   | 0.096   | -0.056  | 1 |
| JW0105 | b0109 | nadC | 2  | -0.016  | 0.171   | 0.266   | 0.168   | 0.100   | 0.005   | 0.203   | 0.067   | 0.157   | 0.039   | 0.015   | 0.031   | -0.004  | 0.059   | -0.011  | 0.196   | 0.200   | 0.295   | 0.130   | 0.043   | 0.009   | -0.030  | 1 |
| JW0106 | b0110 | ampD | 14 | -0.243  | 0.068   | 0.187   | 0.066   | -0.202  | -0.121  | 0.045   | 0.063   | 0.025   | 0.079   | 0.025   | 0.278   | -0.034  | 0.089   | -0.008  | 0.133   | 0.117   | 0.036   | 0.047   | 0.077   | 0.159   | 0.072   | 1 |
| JW0107 | b0111 | ampE | 14 | -0.183  | 0.115   | 0.134   | 0.091   | -0.102  | -0.077  | 0.016   | 0.143   | 0.052   | 0.101   | 0.055   | 0.260   | 0.167   | 0.243   | 0.092   | 0.206   | 0.186   | 0.185   | 0.026   | 0.119   | 0.062   | 0.074   | 1 |
| JW0108 | b0112 | arOP | 11 | -0.199  | 0.096   | 0.105   | 0.140   | -0.140  | 0.055   | 0.072   | 0.026   | -0.068  | 0.171   | 0.051   | 0.176   | 0.213   | 0.289   | 0.166   | 0.065   | -0.037  | 0.097   | 0.034   | -0.009  | 0.172   | -0.044  | 1 |
| JW0109 | b0113 | pdhR | 9  | 0.111   | 0.088   | 0.199   | 0.011   | -0.033  | 0.026   | 0.119   | 0.127   | 0.025   | 0.021   | 0.010   | 0.115   | 0.148   | 0.300   | 0.080   | 0.258   | 0.163   | 0.120   | 0.104   | 0.127   | 0.084   | 0.034   | 1 |
| JW0110 | b0114 | aceE | 6  | -0.168  | 0.045   | 0.126   | 0.079   | 0.075   | -0.082  | -0.046  | 0.193   | 0.180   | -0.009  | 0.051   | 0.263   | 0.015   | 0.083   | 0.052   | 0.098   | 0.218   | 0.222   | 0.077   | 0.123   | 0.126   | 0.046   | 1 |
| JW0111 | b0115 | aceF | 6  | 0.164   | 0.060   | 0.177   | 0.277   | 0.218   | 0.082   | 0.103   | 0.288   | 0.176   | -0.022  | -0.022  | -0.040  | 0.103   | 0.193   | 0.015   | -0.112  | 0.187   | 0.139   | 0.035   | 0.161   | 0.140   | 0.015   | 1 |
| JW0112 | b0116 | lpdA | 6  | 0.033   | -0.096  | 0.080   | 0.032   | -0.032  | 0.009   | 0.057   | 0.130   | 0.058   | -0.025  | -0.026  | -0.093  | 0.189   | 0.129   | 0.025   | 0.169   | 0.111   | 0.137   | -0.088  | 0.116   | 0.267   | -0.038  | 1 |
| JW0113 | b0117 | yacH | 15 | -0.349  | -0.421  | -0.426  | -0.338  | -0.554  | -0.016  | -0.344  | -0.613  | -0.443  | -0.350  | -0.180  | 0.007   | -0.300  | -0.147  | -0.178  | -0.780  | -0.696  | -0.574  | -0.426  | -0.050  | -0.140  | -0.134  | 1 |
| JW0114 | b0118 | acnB | 5  | -0.193  | -0.205  | 0.030   | 0.039   | -0.035  | 0.094   | -0.030  | -0.042  | -0.106  | -0.089  | -0.170  | 0.063   | -0.082  | -0.112  | -0.185  | -0.125  | -0.083  | -0.133  | 0.003   | -0.108  | -0.010  | -0.109  | 1 |
| JW0115 | b0119 | yacL | 15 | -0.399  | -0.029  | -0.036  | 0.043   | -0.053  | -0.025  | -0.167  | -0.072  | -0.040  | -0.143  | 0.015   | 0.198   | -0.061  | 0.034   | -0.021  | -0.053  | -0.067  | -0.048  | -0.121  | 0.112   | 0.163   | 0.072   | 1 |
| JW0116 | b0120 | speD | 5  | 0.004   | 0.149   | 0.059   | 0.210   | 0.173   | 0.077   | 0.026   | 0.139   | 0.206   | -0.001  | 0.093   | 0.256   | 0.131   | 0.205   | 0.080   | 0.229   | 0.195   | 0.161   | -0.040  | 0.116   | 0.147   | 0.174   | 1 |
| JW0117 | b0121 | speE | 5  | 0.061   | 0.072   | 0.157   | 0.231   | 0.052   | 0.087   | 0.113   | 0.179   | -0.008  | 0.082   | 0.089   | 0.238   | 0.211   | 0.275   | 0.132   | 0.189   | 0.114   | 0.031   | 0.082   | 0.151   | 0.203   | 0.101   | 1 |
| JW0118 | b0122 | yacC | 15 | 0.018   | 0.091   | 0.054   | 0.271   | 0.182   | 0.181   | 0.039   | 0.178   | 0.046   | -0.070  | 0.051   | 0.144   | 0.076   | 0.159   | 0.014   | 0.146   | 0.073   | 0.113   | 0.018   | 0.094   | 0.150   | 0.078   | 1 |
| JW0119 | b0123 | yacK | 15 | -0.098  | -0.372  | -0.319  | -0.021  | -0.114  | 0.287   | -0.244  | 0.094   | -0.225  | -0.312  | 0.045   | 0.043   | -0.236  | -0.112  | -0.237  | -0.086  | -0.148  | -0.207  | -0.406  | -0.176  | -0.312  | -0.419  | 1 |
| JW0120 | b0124 | gcd  | 6  | -0.298  | -0.190  | -0.076  | 0.214   | 0.071   | 0.151   | -0.190  | -0.014  | -0.008  | 0.000   | 0.074   | 0.098   | -0.082  | -0.018  | -0.036  | -0.144  | -0.133  | -0.120  | -0.107  | -0.087  | -0.102  | -0.091  | 1 |
| JW0121 | b0125 | hpt  | 8  | 0.161   | 0.117   | 0.108   | 0.367   | 0.416   | 0.214   | 0.146   | 0.493   | 0.224   | 0.045   | 0.025   | 0.196   | 0.094   | 0.227   | 0.114   | 0.328   | 0.342   | 0.405   | 0.050   | 0.219   | 0.248   | 0.205   | 1 |
| JW0122 | b0126 | yadF | 15 | 0.168   | 0.125   | 0.227   | 0.319   | 0.274   | 0.236   | 0.241   | 0.190   | 0.089   | 0.071   | 0.041   | 0.088   | 0.069   | 0.149   | 0.002   | 0.205   | 0.076   | 0.149   | 0.172   | 0.185   | 0.140   | 0.137   | 1 |
| JW0123 | b0127 | yadG | 11 | -0.103  | -0.044  | -0.065  | 0.275   | 0.351   | 0.297   | 0.146   | 0.252   | 0.110   | -0.003  | 0.025   | -0.155  | 0.035   | 0.229   | 0.086   | 0.196   | 0.107   | 0.187   | -0.160  | 0.006   | 0.189   | 0.145   | 1 |
| JW0124 | b0128 | yadH | 15 | -0.139  | -0.229  | -0.110  | -0.040  | -0.075  | 0.171   | 0.025   | -0.018  | -0.124  | 0.127   | -0.047  | -0.132  | -0.057  | 0.128   | 0.025   | -0.012  | -0.014  | -0.110  | -0.261  | -0.059  | 0.012   | 0.081   | 1 |
| JW0125 | b0129 | yadI | 15 | Invalid | 1 |
| JW0126 | b0130 | yadJ | 15 | -0.005  | -0.154  | -0.197  | 0.072   | -0.135  | 0.266   | -0.172  | 0.016   | -0.259  | 0.123   | 0.078   | 0.240   | -0.102  | -0.011  | -0.154  | -0.097  | -0.101  | 0.025   | -0.225  | 0.004   | 0.024   | -0.094  | 1 |
| JW0127 | b0131 | panD | 2  | 0.062   | -0.053  | -0.002  | 0.137   | 0.024   | 0.109   | 0.012   | -0.043  | -0.077  | 0.082   | 0.030   | 0.155   | 0.015   | 0.053   | -0.049  | 0.204   | 0.143   | 0.113   | -0.094  | 0.161   | 0.036   | -0.026  | 1 |
| JW0128 | b0132 | yadD | 15 | -0.100  | 0.000   | -0.009  | 0.206   | -0.056  | 0.224   | 0.035   | -0.191  | -0.218  | -0.016  | -0.001  | -0.020  | -0.025  | 0.120   | -0.018  | -0.246  | -0.118  | -0.549  | -0.095  | -0.078  | 0.019   | -0.025  | 1 |
| JW0129 | b0133 | panC | 2  | -0.511  | -0.081  | 0.106   | 0.088   | -0.304  | 0.211   | 0.066   | -0.349  | -0.396  | 0.100   | 0.049   | 0.037   | -0.123  | -0.326  | -0.409  | -0.333  | -0.246  | -0.466  | 0.009   | 0.173   | 0.285   | -0.425  | 1 |
| JW0130 | b0134 | panB | 2  | -0.731  | -0.397  | -0.378  | -0.188  | -0.336  | 0.101   | -0.289  | -0.371  | -0.329  | 0.034   | -0.024  | 0.175   | -0.284  | -0.137  | -0.166  | -0.459  | -0.410  | -0.352  | -0.288  | -0.261  | -0.203  | -0.105  | 1 |
| JW0131 | b0135 | yadC | 15 | -6.490  | -5.014  | -5.878  | -5.861  | -6.053  | 0.032   | -4.853  | -5.702  | -5.226  | 0.134   | 0.129   | -1.672  | -5.258  | -4.888  | -4.815  | -5.789  | -5.643  | -4.393  | -5.059  | -5.795  | -4.830  | -5.180  | 1 |
| JW0132 | b0136 | yadK | 15 | -4.964  | -1.112  | -1.293  | -1.833  | -3.885  | 0.045   | -1.003  | -4.050  | -3.551  | 0.041   | 0.031   | -4.176  | -0.954  | -0.985  | -0.989  | -3.812  | -3.737  | -1.070  | -1.119  | -4.927  | -0.866  | -0.897  | 1 |
| JW0133 | b0137 | yadL | 15 | -5.437  | -0.755  | -0.927  | -1.640  | -5.238  | 0.117   | -0.594  | -5.337  | -4.892  | 0.153   | 0.083   | -4.994  | -0.623  | -0.608  | -0.660  | -5.140  | -5.122  | -0.336  | -0.845  | -5.823  | -0.620  | -0.568  | 1 |
| JW0134 | b0138 | yadM | 15 | -4.871  | 0.112   | 0.057   | -0.874  | -4.830  | 0.089   | 0.204   | -4.574  | -4.496  | 0.224   | 0.172   | -4.682  | 0.160   | 0.254   | 0.177   | -4.626  | -4.510  | -0.209  | 0.038   | -5.337  | -0.239  | 0.410   | 1 |
| JW0135 | b0139 | htrE | 11 | -6.168  | -0.196  | -0.287  | -1.040  | -3.446  | 0.208   | -0.099  | -3.526  | -3.146  | 0.078   | 0.043   | -6.534  | -0.170  | -0.086  | -0.275  | -3.238  | -3.465  | -0.155  | -0.206  | -7.326  | -0.215  | -0.729  | 1 |
| JW0136 | b0140 | ecpD | 3  | -6.029  | 0.020   | 0.006   | -0.842  | -2.638  | 0.109   | 0.159   | -2.317  | -2.362  | 0.102   | 0.100   | -2.124  | -0.026  | -4.307  | -0.016  | -1.965  | -2.222  | -1.733  | -0.125  | -6.114  | 0.141   | 0.057   | 1 |
| JW0137 | b0141 | yadN | 15 | -5.123  | -0.268  | -0.373  | -1.120  | -2.705  | 0.067   | -0.210  | -2.828  | -2.222  | 0.174   | 0.069   | -0.030  | -0.306  | -0.372  | -0.324  | -2.484  | -2.458  | -2.004  | -0.331  | -5.265  | -0.277  | -0.278  | 1 |
| JW0138 | b0142 | foiK | 2  | -1.505  | -1.011  | -0.961  | -0.631  | -0.756  | 0.187   | -0.893  | -0.727  | -0.773  | 0.020   | 0.078   | 0.208   | -0.893  | -0.827  | -0.906  | -0.870  | -0.720  | -0.909  | -0.957  | -0.891  | -0.777  | -0.903  | 1 |
| JW0139 | b0143 | pcnB | 12 | 0.06    |         |         |         |         |         |         |         |         |         |         |         |         |         |         |         |         |         |         |         |         |         |   |

|        |       |            |    |        |        |        |        |        |        |        |        |        |        |        |        |        |        |        |        |        |        |        |        |        |        |   |
|--------|-------|------------|----|--------|--------|--------|--------|--------|--------|--------|--------|--------|--------|--------|--------|--------|--------|--------|--------|--------|--------|--------|--------|--------|--------|---|
| JW0182 | b0187 | yaeR       | 15 | -0.065 | -0.098 | -0.054 | -0.146 | -0.221 | -0.195 | -0.033 | -0.222 | -0.129 | -0.235 | -0.240 | -0.235 | -0.152 | -0.186 | -0.162 | -0.220 | -0.049 | 0.125  | -0.147 | -0.056 | -0.030 | -0.078 | 1 |
| JW0183 | b0188 | mesJ       | 4  | -0.174 | -0.393 | -0.383 | -0.300 | -0.167 | 0.033  | -0.441 | -0.304 | -0.208 | -0.521 | -0.530 | -0.190 | -0.447 | -0.496 | -0.365 | -0.429 | -0.312 | -0.455 | -0.295 | -0.240 | -0.115 | -0.191 | 1 |
| JW0184 | b0189 | rof        | 15 | -0.095 | -0.205 | -0.253 | -0.246 | -0.162 | -0.017 | -0.198 | -0.227 | -0.230 | -0.264 | -0.348 | -0.030 | -0.212 | -0.183 | -0.246 | -0.290 | -0.253 | -0.283 | -0.173 | -0.019 | 0.068  | 0.041  | 1 |
| JW0185 |       | yaeP       | 15 | 0.186  | 0.111  | 0.137  | 0.147  | 0.325  | 0.077  | 0.156  | 0.269  | 0.253  | -0.003 | 0.051  | 0.215  | 0.164  | 0.178  | 0.062  | 0.207  | 0.255  | 0.241  | 0.088  | 0.181  | 0.221  | 0.220  | 1 |
| JW0186 | b0190 | yaeQ       | 15 | 0.058  | 0.047  | 0.006  | -0.179 | -0.214 | 0.154  | 0.141  | -0.161 | -0.263 | -0.206 | -0.109 | 0.085  | 0.030  | 0.170  | 0.023  | -0.169 | -0.243 | -0.221 | -0.072 | 0.135  | 0.254  | 0.162  | 1 |
| JW0187 | b0191 | yaeJ       | 15 | -0.067 | -0.091 | -0.130 | -0.232 | -0.188 | 0.096  | 0.029  | -0.175 | -0.155 | -0.257 | -0.194 | -0.159 | -0.155 | -0.043 | -0.119 | -0.076 | -0.206 | -0.101 | -0.131 | -0.030 | 0.066  | -0.042 | 1 |
| JW0188 | b0192 | cutF       | 11 | -0.074 | -0.178 | -0.330 | -0.179 | 0.050  | -0.014 | -0.101 | -0.088 | -0.060 | -0.217 | -0.329 | -0.314 | -0.151 | -0.107 | -0.193 | -0.151 | 0.024  | -0.095 | -0.255 | -0.066 | 0.093  | 0.007  | 1 |
| JW0189 | b0193 | yaeF       | 15 | -0.358 | -0.003 | 0.078  | -0.076 | -0.457 | 0.017  | 0.073  | -0.299 | -0.292 | -0.372 | -0.001 | 0.206  | -0.322 | -0.247 | -0.311 | -0.417 | -0.441 | -0.461 | -0.011 | 0.138  | 0.107  | 0.054  | 1 |
| JW0190 | b0194 | proS       | 12 | 0.028  | 0.070  | 0.162  | 0.168  | 0.119  | 0.025  | 0.029  | 0.084  | -0.014 | -0.125 | -0.039 | 0.166  | 0.051  | -0.061 | -0.072 | 0.019  | -0.006 | 0.081  | 0.183  | 0.144  | 0.031  | 0.102  | 1 |
| JW0191 | b0195 | yaeB       | 15 | -0.057 | 0.014  | 0.038  | 0.138  | 0.076  | 0.121  | 0.051  | 0.084  | -0.051 | -0.171 | 0.031  | 0.156  | 0.036  | 0.073  | -0.021 | 0.021  | -0.004 | -0.033 | -0.060 | 0.106  | 0.130  | 0.094  | 1 |
| JW0192 | b0196 | rcsF       | 3  | 0.149  | -0.035 | 0.018  | 0.145  | 0.182  | 0.021  | 0.046  | 0.226  | 0.155  | -0.003 | 0.021  | 0.149  | 0.106  | 0.166  | 0.106  | 0.247  | 0.379  | 0.359  | -0.054 | 0.130  | 0.123  | 0.072  | 1 |
| JW0193 | b0197 | yaeC       | 15 | -0.031 | -0.055 | -0.054 | 0.090  | 0.048  | 0.048  | 0.076  | 0.123  | 0.059  | -0.080 | 0.017  | 0.067  | 0.004  | 0.116  | 0.019  | 0.221  | 0.139  | 0.199  | -0.123 | 0.105  | 0.115  | 0.057  | 1 |
| JW0194 | b0198 | yaeE       | 15 | -0.338 | -0.234 | -0.174 | 0.035  | 0.058  | 0.086  | -0.058 | 0.208  | 0.001  | -0.159 | -0.301 | -0.038 | -0.116 | -0.041 | -0.093 | 0.107  | 0.058  | 0.128  | -0.235 | -0.140 | 0.119  | -0.014 | 1 |
| JW0195 | b0199 | abc        | 11 | 0.030  | -0.007 | -0.014 | 0.192  | 0.296  | 0.101  | -0.049 | 0.146  | 0.156  | -0.027 | -0.162 | 0.045  | -0.002 | 0.094  | 0.064  | 0.221  | 0.253  | 0.326  | 0.034  | 0.086  | 0.033  | 0.166  | 1 |
| JW0196 | b0200 | yaeD       | 15 | 0.142  | 0.019  | 0.002  | 0.231  | 0.222  | 0.161  | 0.110  | 0.202  | 0.049  | -0.049 | -0.017 | 0.115  | 0.055  | 0.077  | 0.036  | 0.100  | 0.066  | 0.074  | 0.017  | 0.105  | 0.056  | 0.090  | 1 |
| JW0197 | b0207 | yafB       | 15 | 0.022  | -0.067 | 0.060  | 0.157  | 0.102  | 0.260  | 0.201  | 0.153  | -0.055 | -0.229 | 0.066  | 0.152  | 0.000  | 0.079  | -0.010 | 0.090  | -0.018 | 0.003  | -0.025 | 0.029  | 0.187  | -0.060 | 1 |
| JW0198 | b0208 | yafC       | 9  | -0.017 | -0.062 | 0.095  | 0.221  | 0.180  | 0.154  | 0.149  | 0.156  | 0.061  | -0.151 | 0.042  | 0.062  | 0.046  | 0.208  | 0.092  | 0.287  | 0.056  | 0.169  | -0.010 | 0.073  | 0.090  | 0.043  | 1 |
| JW0199 | b0209 | yafD       | 15 | -0.148 | -0.010 | -0.021 | 0.179  | 0.323  | 0.127  | 0.037  | 0.251  | 0.178  | -0.082 | 0.020  | 0.002  | -0.112 | -0.052 | -0.110 | 0.135  | 0.224  | 0.266  | -0.141 | 0.010  | 0.094  | 0.049  | 1 |
| JW0200 | b0210 | yafE       | 15 | -0.270 | -0.045 | 0.084  | 0.243  | -0.016 | 0.085  | -0.023 | 0.269  | 0.003  | 0.080  | 0.094  | 0.264  | -0.065 | -0.007 | -0.076 | 0.006  | 0.177  | -0.189 | -0.014 | 0.090  | 0.121  | 0.014  | 1 |
| JW0201 | b0211 | dnrR / mtD | 6  | -0.258 | -0.075 | 0.166  | 0.323  | 0.223  | 0.164  | -0.038 | 0.268  | 0.173  | 0.052  | 0.117  | 0.241  | 0.078  | 0.154  | -0.020 | 0.205  | 0.163  | 0.272  | 0.047  | 0.016  | 0.005  | 0.112  | 1 |
| JW0202 | b0212 | gloB       | 5  | -0.018 | -0.026 | -0.079 | 0.328  | 0.254  | 0.245  | -0.014 | 0.338  | 0.084  | -0.045 | 0.111  | 0.254  | 0.094  | 0.219  | 0.081  | 0.195  | 0.108  | 0.174  | -0.132 | -0.019 | 0.065  | 0.031  | 1 |
| JW0203 | b0213 | yafS       | 15 | 0.021  | -0.011 | 0.110  | 0.327  | -0.096 | 0.267  | 0.165  | 0.249  | -0.009 | 0.046  | 0.118  | 0.015  | 0.059  | 0.185  | 0.042  | 0.145  | 0.044  | 0.131  | -0.027 | -0.061 | 0.084  | 0.041  | 1 |
| JW0204 | b0214 | rnhA       | 8  | 0.118  | 0.034  | 0.162  | 0.469  | 0.407  | 0.204  | 0.236  | 0.413  | 0.253  | -0.060 | 0.071  | -0.031 | -0.030 | 0.029  | -0.054 | 0.477  | 0.328  | 0.348  | 0.058  | 0.147  | 0.187  | -0.013 | 1 |
| JW0205 | b0215 | dnaC       | 10 | -0.061 | -0.050 | -0.011 | 0.114  | 0.119  | 0.141  | 0.021  | 0.221  | -0.019 | -0.200 | 0.083  | -0.122 | 0.058  | 0.151  | 0.076  | 0.126  | 0.096  | 0.133  | -0.155 | -0.048 | 0.120  | -0.039 | 1 |
| JW0206 | b0217 | yafT       | 15 | -0.669 | -0.175 | -0.079 | -1.062 | -4.012 | -0.044 | -0.274 | -4.140 | -3.817 | -3.090 | -2.962 | -0.226 | -0.409 | -0.636 | -0.405 | -1.762 | -1.851 | -2.081 | -0.251 | -4.167 | -0.176 | -0.235 | 1 |
| JW0207 | b0218 | yafU       | 15 | -5.097 | 0.070  | -0.031 | -1.104 | -6.657 | -0.016 | -0.029 | -7.351 | -6.283 | -4.878 | -4.782 | 0.312  | 0.001  | 0.172  | 0.120  | -6.122 | -5.026 | -5.721 | -0.119 | -6.429 | 0.226  | 0.141  | 1 |
| JW0209 | b0219 | yafV       | 15 | -0.138 | -0.010 | -0.075 | -0.193 | -0.490 | 0.240  | -0.231 | -0.705 | -0.731 | 0.049  | 0.053  | 0.314  | -0.037 | -0.237 | -0.017 | -0.296 | -0.118 | -0.249 | -0.165 | -0.569 | -0.021 | 0.076  | 1 |
| JW0210 | b0220 | up18       | 15 | -0.007 | 0.135  | 0.191  | 0.137  | -0.088 | 0.112  | 0.017  | 0.023  | -0.114 | 0.038  | 0.077  | 0.109  | 0.119  | 0.095  | 0.067  | 0.029  | 0.040  | 0.137  | 0.054  | 0.045  | 0.088  | 0.143  | 1 |
| JW0212 | b0222 | gmH        | 6  | -0.148 | 0.096  | 0.200  | 0.363  | 0.277  | 0.181  | 0.000  | 0.255  | 0.038  | -0.025 | -0.026 | -0.093 | 0.062  | -0.052 | 0.005  | 0.001  | 0.184  | 0.152  | 0.179  | 0.075  | 0.014  | -0.010 | 1 |
| JW0213 | b0223 | yafJ       | 15 | -0.151 | 0.020  | 0.118  | 0.260  | 0.278  | 0.157  | 0.100  | 0.279  | 0.139  | 0.008  | -0.032 | -0.194 | 0.001  | 0.023  | -0.007 | 0.026  | 0.264  | 0.285  | -0.006 | 0.031  | 0.050  | -0.069 | 1 |
| JW0214 | b0224 | yafK       | 15 | -0.365 | -0.060 | 0.007  | 0.073  | -0.026 | -0.037 | -0.105 | 0.105  | 0.058  | 0.165  | 0.009  | 0.038  | -0.080 | -0.004 | -0.024 | 0.036  | 0.094  | 0.149  | -0.134 | -0.044 | -0.139 | 0.128  | 1 |
| JW0215 | b0225 | yafQ       | 15 | -0.050 | -0.104 | -0.074 | -0.460 | -1.508 | 0.125  | -0.162 | -1.350 | -1.539 | -0.162 | 0.014  | 0.090  | 0.003  | -0.007 | -0.017 | -1.418 | -1.129 | -1.228 | -0.172 | -1.419 | 0.001  | -0.062 | 1 |
| JW0216 | b0226 | dinJ       | 15 | 0.347  | 0.052  | 0.079  | -0.761 | -4.515 | 0.202  | 0.043  | -3.999 | -4.022 | -0.219 | -0.060 | -0.197 | 0.109  | 0.107  | -0.014 | -4.589 | -3.673 | -4.038 | -0.173 | -4.207 | -0.055 | -0.104 | 1 |
| JW0217 | b0227 | yafL       | 15 | -0.300 | -0.581 | -0.701 | -0.613 | -0.741 | 0.150  | -0.474 | -0.646 | -0.678 | -0.267 | -0.270 | -0.356 | -0.514 | -0.504 | -0.576 | -0.581 | -0.546 | -0.680 | -0.704 | -1.345 | -0.675 | -0.648 | 1 |
| JW0218 | b0228 | yafM       | 15 | -0.674 | -2.302 | -2.524 | -2.433 | -2.560 | 0.110  | -2.187 | -0.746 | -2.467 | -0.168 | -0.240 | -0.296 | -2.472 | -2.349 | -0.887 | -0.887 | -0.780 | -2.295 | -1.232 | -0.248 | -0.272 | 1      |   |
| JW0219 | b0229 | fhfA       | 3  | -0.657 | -0.373 | -0.252 | 0.007  | 0.096  | -0.006 | -0.310 | -0.268 | -0.003 | -0.174 | -0.348 | -0.169 | -0.281 | -0.750 | -0.393 | -0.394 | -0.154 | -0.178 | -0.181 | -0.350 | -0.818 | -0.246 | 1 |
| JW0220 | b0230 | lafJ       | 4  | -0.114 | -0.142 | -0.117 | -0.217 | -0.426 | 0.096  | -0.132 | 0.040  | -0.432 | -0.253 | -0.329 | -0.066 | -0.108 | -0.098 | -0.121 | -0.192 | -0.040 | -0.168 | -0.098 | 0.067  | -4.411 | -0.079 | 1 |
| JW0221 | b0231 | dinP       | 10 | -0.007 | -0.207 | -0.174 | -0.348 | -0.598 | 0.082  | -0.290 | -0.346 | -0.688 | -0.318 | -0.229 | -0.112 | -0.134 | -0.193 | -0.184 | -0.427 | -0.193 | -0.073 | -0.221 | -0.017 | -0.123 | -0.124 | 1 |
| JW0222 | b0232 | yafN       | 15 | 0.366  | -3.233 | -3.462 | -3.860 | -3.957 | 0.129  | -3.142 | -3.644 | -3.482 | -0.026 | 0.099  | 0.087  | -3.569 | -3.037 | -3.371 | 0.197  | 0.280  | 0.248  | -3.070 | 0.109  | -3.353 | -3.197 | 1 |
| JW0223 | b0233 | yafO       | 15 | -0.457 | -4.774 | -5.557 | -5.495 | -5.514 | -0.180 | -4.599 | -5.541 | -4.393 | -0.256 | -0.241 | -0.062 | -5.179 | -5.210 | -4.656 | 0.075  | -0.159 | -0.189 | -4.575 | -0.147 | -4.726 | -4.687 | 1 |
| JW0224 | b0234 | yafP       | 15 | -0.174 | -0.746 | -0.812 | -0.501 | -0.313 | 0.025  | -0.696 | -0.871 | -0.306 | -0.306 | -0.326 | -0.191 | -0.726 | -0.641 | -0.706 | -0.338 | -0.296 | -0.339 | -0.821 | -0.210 | -0.539 | -0.462 | 1 |
| JW0225 | b0235 | 127#12     | 15 | 0.238  | -0.264 | -0.244 | -0.011 | -0.039 | 0.069  | -0.160 | 0.041  | -0.126 | -0.299 | -0.203 | -0.021 | -0.105 | -0.165 | -0.251 | -0.163 | 0.077  | -0.080 | -0.247 | -0.025 | -0.081 | -0.119 | 1 |
| JW0226 | b0236 | prfH       | 12 | -0.171 | -0.015 | 0.004  | 0.027  | 0.075  | 0.099  | 0.024  | -0.204 | -0.016 | -0.060 | -0.053 | -0.016 | -0.020 | -0.057 | -0.107 | 0.112  | 0.174  | 0.165  | -0.004 | -0.647 | -0.483 | 0.070  | 1 |
| JW0227 | b0237 | pepD       | 14 | -0.057 | -0.091 | -0.152 | -0.156 | -0.287 | 0.126  | -0.011 | -0.191 | -0.288 | -0.327 | -0.283 | -0.188 | -0.099 | -0.047 | -0.108 | -0.187 | -0.130 | -0.175 | -0.204 | -0.003 | -0.015 | -0.027 | 1 |
| JW0228 | b0238 | gpt        | 8  | 0.038  | -0.158 | -0.214 | -0.009 | 0.183  | 0.019  | -0.029 | -0.174 | 0.107  | -0.149 | -0.170 | -0.192 | -0.071 | -0.080 | -0.094 | -0.072 | -0.068 | 0.117  | -0.351 | 0.002  | -0.093 | 0.097  | 1 |
| JW0229 | b0239 | yafA       | 15 | -0.223 | -0.060 | 0.092  | 0.202  | 0.070  | -0.113 | -0.147 | 0.368  | 0.203  | 0.049  | 0.073  | 0.123  | -0.057 | -0.279 | -0.047 | 0.326  | 0.380  | 0.364  | -0.058 | 0.030  | 0.260  | 0.195  | 1 |
| JW0230 | b0240 | cri        | 3  | 0.052  | -0.142 | -0.120 | -0.167 | -0.084 | -0.143 | -0.022 | -0.208 | -0.067 | -0.273 | -0.241 | -0.144 | -0.100 | -0.117 | -0.180 | -0.042 | -0.256 | -0.171 | -      |        |        |        |   |

|        |       |      |    |        |        |        |        |        |        |        |        |        |        |        |        |        |        |        |        |        |        |        |        |         |        |   |
|--------|-------|------|----|--------|--------|--------|--------|--------|--------|--------|--------|--------|--------|--------|--------|--------|--------|--------|--------|--------|--------|--------|--------|---------|--------|---|
| JW0290 | b0296 | ykqM | 12 | 0.250  | 0.039  | 1.424  | 0.519  | -0.053 | 0.130  | 0.171  | 0.053  | -0.001 | 0.135  | 0.127  | -0.817 | 0.158  | 0.165  | 0.180  | 0.131  | -0.026 | 0.073  | -0.075 | -5.414 | -1.533  | -5.159 | 1 |
| JW0291 | b0297 | eeH  | 14 | 0.064  | -0.139 | 1.257  | 0.485  | 0.063  | 0.209  | 0.063  | 0.038  | -0.041 | 0.069  | 0.095  | -0.043 | -0.105 | -0.030 | -0.080 | -0.047 | -0.075 | -0.024 | -0.156 | -5.759 | -0.116  | -5.405 | 1 |
| JW0294 | b0300 | ykqA | 15 | -0.566 | -0.371 | 0.906  | 0.150  | -0.012 | -0.105 | -0.274 | -0.125 | -0.125 | -0.140 | 0.113  | -3.297 | -0.294 | -0.450 | -0.143 | -0.186 | -0.135 | -0.006 | -0.431 | -5.174 | 0.000   | -3.007 | 1 |
| JW0295 | b0301 | ykqB | 15 | -0.128 | 0.086  | 1.326  | 0.552  | 0.089  | 0.082  | 0.057  | 0.045  | 0.058  | 0.067  | -0.031 | -5.670 | 0.027  | 0.178  | 0.169  | 0.095  | 0.032  | 0.270  | -0.072 | -6.795 | 0.316   | 0.254  | 1 |
| JW0297 | b0304 | merA | 2  | 0.047  | 0.000  | 1.169  | 0.473  | 0.167  | 0.107  | -0.011 | 0.194  | -0.019 | 0.066  | 0.020  | -6.155 | -0.007 | 0.097  | 0.023  | 0.028  | 0.052  | 0.131  | -0.203 | -6.601 | 0.190   | 0.118  | 1 |
| JW0298 | b0305 | ykqD | 9  | 0.209  | 0.056  | 1.542  | 0.690  | 0.314  | 0.257  | 0.158  | 0.312  | 0.059  | -0.090 | 0.043  | -4.151 | 0.054  | 0.082  | 0.077  | 0.127  | 0.140  | 0.104  | 0.059  | -4.230 | -0.006  | 0.094  | 1 |
| JW0299 | b0306 | ykqE | 15 | -0.020 | -0.182 | 1.013  | 0.334  | 0.117  | -0.096 | -0.115 | 0.112  | -0.095 | -0.269 | -0.269 | -0.329 | -0.188 | -0.168 | -0.203 | 0.131  | 0.075  | 0.163  | -0.310 | -0.159 | -4.176  | -0.063 | 1 |
| JW0300 | b0307 | ykqF | 15 | 0.073  | 0.090  | 1.516  | 0.719  | 0.488  | 0.239  | 0.180  | 0.483  | 0.160  | 0.020  | 0.044  | -0.041 | 0.117  | 0.078  | 0.022  | 0.284  | 0.250  | 0.289  | 0.155  | 0.101  | -6.177  | 0.185  | 1 |
| JW0301 | b0308 | ykqG | 15 | -0.502 | -0.146 | 1.263  | 0.445  | -0.106 | 0.070  | -0.205 | -0.037 | -0.130 | -0.020 | 0.031  | -0.075 | -0.185 | -0.437 | -0.108 | -0.234 | -0.119 | -0.121 | -0.193 | -0.189 | -5.567  | -0.098 | 1 |
| JW0303 | b0311 | betA | 4  | -0.386 | -0.221 | 1.237  | 0.433  | -0.149 | 0.076  | -0.265 | -0.212 | -0.250 | 0.017  | 0.017  | -6.514 | -0.137 | -0.230 | -0.168 | -0.305 | -0.237 | -0.223 | -0.048 | -6.231 | -7.401  | -6.864 | 1 |
| JW0304 | b0312 | betB | 4  | -0.097 | -0.159 | 1.172  | 0.483  | 0.045  | 0.150  | -0.092 | -0.012 | -0.156 | 0.022  | 0.000  | -2.887 | -0.074 | -0.099 | -0.154 | -0.090 | 0.019  | 0.006  | -0.087 | -3.167 | -4.011  | -3.132 | 1 |
| JW0305 | b0313 | betL | 4  | -0.073 | -0.458 | 0.631  | 0.033  | -0.420 | 0.088  | -0.260 | -0.493 | -0.479 | -0.172 | -0.202 | -1.919 | -0.216 | -0.303 | -0.319 | -0.369 | -0.307 | -0.391 | -0.398 | -2.882 | -2.237  | -2.239 | 1 |
| JW0306 | b0314 | betT | 11 | 0.193  | -0.072 | 1.365  | 0.539  | 0.076  | 0.189  | 0.082  | 0.143  | 0.021  | 0.135  | 0.048  | -7.397 | 0.124  | 0.126  | 0.079  | 0.243  | 0.140  | 0.097  | -0.114 | -7.651 | -7.180  | -6.948 | 1 |
| JW0307 | b0315 | yahA | 15 | -0.454 | -0.598 | 0.391  | -0.085 | -3.456 | 0.105  | -0.474 | -0.087 | -0.288 | 0.032  | -0.012 | -2.537 | -3.238 | -3.079 | -3.161 | -0.127 | -0.101 | -0.073 | -0.701 | -2.791 | -3.553  | -0.267 | 1 |
| JW0308 | b0316 | yahB | 15 | 0.061  | 0.145  | 1.505  | 0.441  | -7.482 | 0.203  | 0.149  | -0.033 | -0.199 | 0.084  | 0.012  | -7.361 | -7.486 | -7.135 | -7.264 | -0.154 | -0.060 | -0.007 | 0.028  | -7.832 | -7.433  | 0.328  | 1 |
| JW0309 | b0317 | yahC | 15 | -0.052 | 0.057  | 1.190  | 0.323  | -3.400 | 0.148  | 0.112  | -0.132 | -0.204 | -0.025 | 0.025  | -4.369 | -5.978 | -6.509 | -6.473 | -0.205 | -0.105 | -0.325 | -0.096 | -7.300 | -7.184  | 0.230  | 1 |
| JW0310 | b0318 | yahD | 15 | -0.209 | 0.192  | 1.514  | 0.388  | -2.163 | 0.113  | 0.261  | -0.238 | -0.161 | 0.037  | -0.010 | -5.559 | -6.115 | -5.799 | -5.991 | -0.157 | -0.216 | -0.116 | 0.081  | -6.728 | -6.746  | 0.307  | 1 |
| JW0311 | b0319 | yahE | 15 | -0.430 | 0.039  | 1.129  | 0.305  | -0.401 | -0.178 | -0.028 | -0.258 | -0.202 | 0.072  | 0.011  | -1.225 | -3.819 | -3.835 | -3.573 | -0.163 | -0.080 | -0.217 | -0.070 | -3.774 | -3.623  | -0.027 | 1 |
| JW0312 | b0320 | yahF | 15 | -0.129 | -0.279 | 0.979  | 0.313  | -0.117 | -0.035 | -0.295 | -0.181 | -0.207 | -0.079 | -0.083 | -0.299 | -5.546 | -5.456 | -5.383 | -0.296 | -0.210 | -0.363 | -0.215 | -5.889 | -5.525  | -0.212 | 1 |
| JW0313 | b0321 | yahG | 15 | -0.139 | -0.343 | 0.907  | 0.202  | -0.049 | -0.057 | -0.464 | -0.197 | -0.061 | -0.158 | -0.170 | 0.029  | -6.648 | -7.094 | -6.696 | -0.292 | -0.227 | -0.141 | -0.242 | -7.363 | -6.306  | -0.291 | 1 |
| JW0315 | b0323 | arcM | 5  | -0.161 | -0.244 | 1.027  | 0.297  | -0.042 | 0.055  | -0.186 | -0.123 | -0.091 | -0.058 | -0.090 | 0.047  | -6.082 | -6.151 | -5.997 | -0.322 | -0.150 | -0.223 | -0.146 | -6.610 | -6.474  | -0.142 | 1 |
| JW0316 | b0324 | yahJ | 14 | -0.094 | -0.387 | 0.860  | 0.145  | -0.081 | 0.025  | -0.375 | -0.199 | -0.186 | 0.004  | -0.029 | 0.123  | -6.641 | -6.901 | -6.550 | -0.337 | -0.139 | -0.224 | -0.367 | -7.321 | -6.865  | -0.318 | 1 |
| JW0317 | b0325 | yahK | 15 | 0.122  | 0.007  | 1.597  | 0.499  | -0.220 | 0.008  | 0.090  | -0.301 | -0.256 | 0.059  | 0.047  | 0.119  | -1.610 | -7.121 | -6.689 | -0.324 | -0.095 | -0.233 | 0.035  | -7.331 | -7.222  | 0.113  | 1 |
| JW0318 | b0326 | yahL | 15 | 0.167  | 0.134  | 1.405  | -0.168 | -3.134 | -0.050 | 0.230  | -2.451 | -2.807 | 0.107  | 0.107  | -0.008 | -6.732 | -6.777 | -6.726 | -3.084 | -2.670 | -2.950 | 0.028  | -7.331 | -7.243  | 0.137  | 1 |
| JW0319 | b0327 | yahM | 15 | 0.094  | -0.061 | -0.036 | -0.070 | -0.160 | -0.134 | 0.062  | -0.251 | 0.038  | -0.148 | -0.024 | -0.125 | -5.138 | -4.574 | -4.613 | 0.092  | -0.177 | 0.223  | -0.056 | -5.447 | -5.326  | 0.039  | 1 |
| JW0320 | b0328 | yahN | 15 | -0.321 | 0.003  | -0.049 | -0.134 | -0.332 | -0.188 | -0.152 | -0.164 | 0.067  | 0.094  | 0.202  | 0.176  | -6.069 | -6.166 | -6.336 | 0.176  | 0.042  | 0.110  | -0.116 | -6.717 | -6.732  | 0.062  | 1 |
| JW0321 | b0329 | yahO | 15 | -0.148 | 0.020  | 0.058  | -0.001 | -0.223 | -0.141 | -0.005 | -0.244 | -0.071 | 0.047  | 0.044  | -0.103 | -4.320 | -4.398 | -4.277 | -0.042 | -0.231 | -0.138 | 0.059  | -5.215 | -5.382  | -4.021 | 1 |
| JW0322 | b0330 | prpR | 9  | -0.028 | -0.227 | 0.004  | -0.017 | -0.278 | 0.050  | -0.145 | -0.456 | -0.296 | 0.033  | 0.105  | -3.249 | -6.112 | -6.004 | -6.209 | -0.169 | -0.382 | -0.463 | -0.102 | -6.760 | -6.425  | -5.938 | 1 |
| JW0323 | b0331 | bcpA | 15 | -0.134 | -0.116 | 0.073  | 0.138  | -0.065 | 0.092  | -0.105 | -0.227 | -0.150 | 0.006  | 0.044  | -3.266 | -3.578 | -3.255 | -3.627 | -0.268 | -0.180 | -0.245 | -0.110 | -3.785 | -3.636  | -3.550 | 1 |
| JW0324 | b0333 | prpC | 6  | 0.077  | -0.099 | -0.016 | -0.108 | -0.384 | -0.002 | -0.002 | -0.356 | -0.393 | 0.076  | 0.003  | -6.097 | -6.638 | -6.697 | -6.875 | -0.079 | -0.206 | -0.177 | -0.082 | -7.057 | -6.985  | -6.825 | 1 |
| JW0325 | b0334 | prpD | 15 | 0.225  | -0.156 | 0.019  | -0.034 | -0.048 | 0.002  | -0.100 | -0.050 | -0.072 | -0.019 | -0.028 | -6.024 | -7.564 | -7.412 | -7.724 | -0.109 | 0.074  | -0.020 | 0.033  | -7.998 | -7.267  | -7.091 | 1 |
| JW0326 | b0335 | prpE | 7  | 0.045  | -0.082 | 0.281  | 0.169  | -0.207 | 0.011  | -0.117 | -0.162 | -0.197 | 0.076  | 0.048  | -0.317 | -2.851 | -2.726 | -2.995 | -0.186 | -0.147 | -0.197 | 0.036  | -5.170 | -5.379  | -4.902 | 1 |
| JW0327 | b0336 | codB | 11 | -0.220 | -0.056 | 0.082  | 0.024  | -0.192 | -0.123 | -0.054 | -0.217 | -0.001 | 0.013  | -0.020 | 0.168  | -3.836 | -3.751 | -3.865 | -0.151 | -0.091 | -0.125 | -0.025 | -3.926 | -3.912  | -3.978 | 1 |
| JW0328 | b0337 | codA | 8  | 0.059  | 0.114  | 0.149  | 0.097  | -0.134 | -0.051 | 0.014  | -0.157 | -0.065 | 0.069  | 0.052  | 0.167  | -6.311 | -6.199 | -6.237 | -0.026 | 0.036  | -0.121 | 0.039  | -6.777 | -6.761  | -6.552 | 1 |
| JW0329 | b0338 | cynR | 6  | 0.007  | -0.147 | -0.160 | -1.238 | -6.158 | 0.046  | -0.248 | -6.065 | -5.430 | -0.016 | 0.044  | 0.107  | -5.138 | -6.150 | -6.123 | -5.850 | -5.548 | -6.166 | -0.237 | -7.083 | -6.935  | -6.800 | 1 |
| JW0330 | b0339 | cynT | 5  | 0.274  | 0.175  | 0.270  | -0.888 | -6.034 | 0.037  | 0.192  | -5.381 | -5.384 | 0.078  | 0.029  | 0.033  | -5.553 | -5.302 | -5.403 | -5.413 | -5.243 | -5.956 | 0.208  | -6.157 | -5.896  | -5.544 | 1 |
| JW0331 | b0340 | cynS | 5  | -0.120 | -0.319 | -0.292 | -1.220 | -5.759 | 0.054  | -0.125 | -5.853 | -5.212 | 0.078  | 0.076  | -0.007 | -5.689 | -5.376 | -5.399 | -5.572 | -5.828 | -6.199 | -0.354 | -6.172 | Invalid | -6.185 | 1 |
| JW0332 | b0341 | cynX | 11 | -0.166 | -0.196 | 0.002  | -1.221 | -6.198 | -0.055 | -0.020 | -5.992 | -5.285 | 0.041  | -0.027 | -0.073 | -3.195 | -3.079 | -3.135 | -5.946 | -5.621 | -5.745 | -0.147 | -7.306 | -7.198  | -6.933 | 1 |
| JW0333 | b0342 | lacY | 6  | -0.277 | -3.163 | -0.303 | -0.410 | -0.598 | -0.135 | -0.148 | -0.682 | -0.401 | -0.046 | -0.034 | 0.142  | -0.320 | -0.221 | -0.149 | -0.577 | -0.495 | -0.670 | -0.345 | -7.188 | -7.341  | -6.318 | 1 |
| JW0334 | b0343 | lacY | 11 | 0.026  | 0.016  | -0.014 | 0.014  | 0.102  | -0.081 | 0.053  | 0.110  | 0.228  | 0.052  | 0.034  | 0.122  | 0.124  | 0.182  | 0.093  | 0.097  | 0.199  | 0.205  | -0.055 | -7.307 | -7.372  | -2.651 | 1 |
| JW0335 | b0344 | lacZ | 6  | -0.145 | -0.007 | -0.041 | -0.071 | -0.122 | -0.085 | -0.065 | -0.237 | -0.060 | 0.080  | 0.003  | -0.062 | -0.107 | -0.083 | -0.135 | -0.140 | -0.126 | -0.192 | -0.063 | -7.932 | -7.862  | -0.165 | 1 |
| JW0336 | b0345 | lacI | 6  | 0.119  | -0.265 | -0.086 | -0.411 | -0.859 | -0.013 | -0.071 | -0.791 | -0.753 | 0.014  | -0.024 | -0.009 | 0.179  | 0.082  | -0.002 | -0.680 | -0.643 | -0.630 | -0.155 | -7.602 | -7.365  | -0.170 | 1 |
| JW0337 | b0346 | mhpR | 5  | 0.090  | -0.006 | 0.031  | -1.133 | -5.052 | -0.055 | 0.016  | -4.849 | -4.625 | -0.124 | -0.076 | -0.243 | 0.080  | 0.004  | -0.152 | -4.984 | -4.760 | -4.970 | -0.039 | -7.284 | -7.022  | -0.238 | 1 |
| JW0338 | b0347 | mhpA | 6  | 0.113  | -0.062 | 0.079  | -1.129 | -5.004 | -0.110 | 0.099  | -4.791 | -4.602 | -0.096 | -0.197 | -0.199 | 0.039  | -0.053 | -0.011 | -4.765 | -4.509 | -4.619 | -0.060 | -4.964 | -4.914  | -0.027 | 1 |
| JW0339 | b0348 | mhpB | 6  | -0.197 | -0.167 | -0.032 | -1.026 | -5.767 | -0.139 | -0.146 | -5.423 | -5.437 | -0.107 | -0.128 | 0.006  | 0.018  | -0.049 | -0.103 | -5.252 | -5.207 | -5.456 | -0.077 | -5.634 | -5.474  | -0.033 | 1 |
| JW0340 | b0349 | mhpC | 6  | -0.010 | -0.208 | -0.140 | -1.275 | -6.207 | -0.065 | -0.319 | -6.231 | -5.852 | -0.301 | -0.264 | -0.075 | 0.020  | 0.020  | -0.120 | -5.910 | -6.036 | -6.185 | -0.251 | -7.502 | -7.337  | -0.117 | 1 |
| JW0341 | b0350 | mhpD | 6  | 0.026  | -0.147 | -0.157 | -1.179 | -6.126 | 0.011  | -0.148 | -5.999 | -5.799 | -0.004 | 0.038  | -0.049 | 0.113  | -0.034 | -0.148 | -5.870 | -6.154 | -6.190 | -      |        |         |        |   |



|        |       |             |    |        |        |        |        |        |        |        |        |        |        |        |        |        |        |        |        |        |        |        |        |         |        |  |   |
|--------|-------|-------------|----|--------|--------|--------|--------|--------|--------|--------|--------|--------|--------|--------|--------|--------|--------|--------|--------|--------|--------|--------|--------|---------|--------|--|---|
| JW0390 | b0400 | phoR        | 9  | -0.138 | -0.045 | -0.126 | -0.023 | 0.056  | -0.122 | -0.066 | 0.121  | 0.120  | -0.095 | -0.067 | 0.050  | 0.005  | 0.110  | 0.144  | -0.003 | 0.154  | 0.115  | -0.056 | 0.057  | 0.051   | 0.076  |  |   |
| JW0391 | b0401 | brnQ        | 11 | 0.042  | 0.031  | 0.010  | -0.028 | -0.101 | -0.032 | 0.035  | -0.023 | 0.001  | 0.017  | -0.067 | 0.121  | 0.041  | 0.107  | -0.004 | -0.149 | -0.019 | -0.026 | 0.005  | -0.079 | -0.184  | -0.054 |  | 1 |
| JW0392 | b0402 | proY        | 11 | 0.165  | -0.001 | -0.063 | 0.028  | 0.091  | 0.042  | 0.061  | 0.010  | 0.091  | 0.010  | -0.023 | 0.149  | 0.141  | 0.194  | 0.068  | 0.085  | 0.135  | 0.156  | -0.108 | 0.184  | 0.171   | 0.191  |  | 1 |
| JW0393 | b0403 | malZ        | 6  | -0.012 | -0.043 | -0.073 | -0.193 | -0.109 | 0.075  | 0.021  | -0.163 | -0.138 | -0.047 | -0.035 | 0.015  | 0.049  | 0.121  | -0.014 | -0.094 | -0.076 | -0.156 | -0.081 | 0.090  | -0.030  | 0.017  |  | 1 |
| JW0394 | b0404 | yajH        | 15 | 0.010  | 0.076  | 0.272  | -0.197 | -0.358 | -0.062 | 0.234  | -0.443 | -0.278 | 0.000  | -0.031 | -0.020 | 0.057  | 0.078  | 0.029  | -0.264 | -0.220 | -0.218 | 0.167  | 0.161  | 0.239   | 0.171  |  | 1 |
| JW0395 | b0405 | queA        | 12 | -0.062 | -0.058 | -0.019 | -0.208 | -0.115 | -0.050 | 0.037  | -0.149 | -0.170 | -0.044 | -0.047 | -0.147 | -0.004 | -0.089 | -0.045 | -0.132 | 0.008  | -0.126 | -0.076 | -0.161 | -0.003  | 0.086  |  | 1 |
| JW0396 | b0406 | tgt         | 12 | -0.146 | 0.062  | 0.126  | 0.044  | -0.061 | -0.177 | 0.058  | -0.010 | 0.100  | 0.004  | -0.004 | 0.210  | 0.039  | 0.112  | 0.108  | 0.047  | 0.159  | 0.123  | 0.009  | -0.042 | 0.192   | 0.242  |  | 1 |
| JW0397 | b0407 | yajC        | 15 | 0.122  | 0.083  | 0.137  | -0.040 | -0.098 | -0.120 | 0.080  | -0.149 | -0.083 | 0.052  | 0.024  | 0.165  | 0.126  | 0.113  | 0.070  | -0.103 | -0.032 | -0.046 | 0.108  | 0.210  | 0.247   | 0.204  |  | 1 |
| JW0398 | b0408 | secD        | 4  | 0.107  | 0.135  | 0.188  | 0.171  | 0.027  | -0.076 | 0.068  | 0.120  | 0.135  | 0.142  | 0.089  | 0.145  | 0.178  | 0.125  | 0.123  | 0.238  | 0.220  | 0.244  | 0.139  | 0.199  | 0.146   | 0.177  |  | 1 |
| JW0399 | b0409 | secF        | 4  | -0.023 | -0.088 | -0.016 | -0.010 | 0.037  | -0.172 | -0.002 | 0.102  | 0.159  | -0.073 | -0.167 | 0.167  | -0.119 | -0.051 | -0.013 | 0.036  | 0.198  | 0.177  | 0.036  | 0.009  | 0.144   | 0.177  |  | 1 |
| JW0400 | b0410 | yajD        | 15 | 0.041  | 0.032  | -0.248 | -0.269 | -0.294 | -0.041 | -0.020 | -0.126 | -0.191 | -0.110 | -0.129 | 0.202  | 0.022  | 0.072  | 0.006  | -0.178 | -0.073 | -0.131 | -0.166 | 0.121  | 0.133   | 0.126  |  | 1 |
| JW0401 | b0411 | tsx         | 11 | 0.246  | 0.103  | 0.005  | 0.019  | 0.052  | -0.022 | 0.079  | -0.232 | 0.102  | 0.052  | 0.001  | 0.222  | 0.091  | 0.137  | -0.012 | -0.250 | -0.184 | -0.188 | 0.021  | 0.271  | 0.218   | 0.186  |  | 1 |
| JW0402 | b0412 | yajI        | 15 | 0.134  | -0.244 | -0.114 | -0.365 | -0.283 | -0.071 | 0.033  | -0.329 | -0.251 | -0.044 | 0.002  | -0.002 | 0.203  | 0.327  | 0.150  | -0.213 | -0.120 | -0.119 | -0.083 | 0.335  | -0.100  | 0.295  |  | 1 |
| JW0403 | b0413 | ybaD        | 15 | 0.157  | 0.016  | -0.058 | -0.081 | 0.183  | 0.042  | 0.097  | 0.130  | 0.095  | -0.099 | 0.003  | -0.063 | 0.204  | 0.076  | 0.035  | 0.039  | 0.121  | 0.074  | -0.071 | -0.043 | 0.148   | -0.016 |  | 1 |
| JW0404 | b0414 | ribD        | 2  | -0.032 | -0.148 | -0.153 | -0.318 | -0.146 | -0.083 | -0.029 | -0.166 | -0.169 | -0.038 | -0.068 | -0.129 | 0.387  | -0.079 | -0.062 | -0.221 | -0.077 | -0.192 | -0.133 | -0.133 | 0.008   | -0.142 |  | 1 |
| JW0405 | b0415 | ribH        | 15 | -0.109 | 0.028  | 0.138  | 0.096  | 0.145  | -0.159 | 0.036  | 0.104  | 0.245  | 0.032  | 0.012  | 0.173  | 0.163  | 0.120  | 0.105  | 0.130  | 0.288  | 0.231  | 0.068  | 0.188  | 0.179   | 0.225  |  | 1 |
| JW0406 | b0416 | nusB        | 13 | 0.041  | -0.059 | 0.047  | -0.039 | 0.020  | -0.144 | -0.020 | 0.066  | 0.106  | 0.074  | -0.031 | 0.226  | 0.135  | 0.178  | 0.091  | 0.075  | 0.174  | 0.222  | -0.060 | 0.169  | 0.082   | 0.239  |  | 1 |
| JW0407 | b0417 | thiL        | 6  | 0.088  | -0.034 | -0.080 | 0.036  | 0.110  | -0.011 | -0.050 | 0.035  | 0.119  | -0.104 | -0.094 | 0.008  | 0.025  | 0.003  | 0.031  | 0.120  | 0.127  | 0.082  | -0.083 | 0.058  | 0.005   | -0.009 |  | 1 |
| JW0408 | b0418 | pgpA        | 7  | -0.089 | -0.105 | -0.120 | -0.191 | -0.325 | -0.056 | 0.018  | -0.433 | -0.176 | -0.253 | -0.303 | -0.194 | -0.145 | -0.079 | -0.242 | 0.033  | -0.022 | -0.198 | -0.123 | 0.038  | -0.243  | -0.004 |  | 1 |
| JW0409 | b0419 | yajO        | 15 | -0.181 | -0.319 | -0.476 | -0.383 | -0.330 | -0.098 | -0.349 | -0.152 | -0.273 | -0.261 | -0.259 | -0.319 | -0.229 | -0.231 | -0.302 | -0.393 | -0.399 | -0.544 | -0.414 | -0.303 | -0.238  | -0.416 |  | 1 |
| JW0410 | b0420 | dks         | 5  | 0.054  | -0.080 | 0.064  | 0.093  | -0.024 | -0.070 | -0.046 | -0.069 | 0.019  | 0.020  | 0.070  | -0.001 | 0.023  | -0.069 | -0.047 | 0.002  | -0.024 | -0.020 | 0.037  | 0.038  | 0.000   | -0.094 |  | 1 |
| JW0411 | b0421 | ispA        | 2  | -0.227 | -0.235 | -0.231 | -0.240 | -0.035 | -0.061 | -0.143 | -0.120 | -0.021 | -0.024 | -0.007 | -0.443 | 0.289  | -0.146 | -0.286 | 0.021  | -0.021 | 0.050  | -0.330 | -0.110 | -0.107  | -0.054 |  | 1 |
| JW0412 | b0422 | xseB        | 14 | -0.006 | -0.095 | -0.056 | -0.164 | -0.099 | -0.037 | -0.025 | -0.063 | -0.028 | -0.101 | -0.118 | -0.062 | -0.028 | 0.021  | 0.028  | 0.145  | 0.116  | 0.043  | -0.213 | 0.122  | -0.013  | -0.039 |  | 1 |
| JW0413 | b0423 | thiI        | 2  | 0.210  | 0.095  | 0.063  | 0.064  | 0.318  | 0.063  | 0.168  | 0.141  | 0.152  | -0.115 | -0.014 | 0.052  | 0.083  | 0.060  | -0.005 | 0.121  | 0.153  | 0.075  | 0.186  | 0.180  | 0.035   | 0.013  |  | 1 |
| JW0414 | b0424 | thiJ        | 2  | -0.065 | -0.087 | -0.139 | -0.190 | 0.071  | -0.009 | -0.030 | -0.005 | -0.081 | -0.092 | -0.138 | -0.114 | -0.183 | -0.180 | -0.180 | -0.080 | 0.150  | 0.049  | -0.213 | -0.232 | -0.087  | -0.032 |  | 1 |
| JW0415 | b0425 | apbA        | 2  | -0.050 | -0.088 | -0.201 | -0.231 | 0.048  | -0.084 | -0.072 | -0.106 | 0.029  | 0.074  | 0.008  | -0.232 | -0.028 | -0.083 | -0.137 | 0.063  | 0.093  | -0.108 | -0.067 | 0.083  | 0.001   | 0.004  |  | 1 |
| JW0416 | b0426 | yajQ        | 15 | -0.268 | 0.081  | -0.096 | -0.015 | 0.076  | -0.196 | -0.092 | 0.192  | 0.235  | 0.014  | -0.022 | -0.133 | -0.251 | -0.223 | -0.208 | 0.086  | 0.274  | 0.189  | -0.133 | -0.010 | 0.000   | 0.065  |  | 1 |
| JW0417 | b0427 | yajR        | 15 | 0.232  | -0.076 | -0.078 | -0.126 | -0.143 | -0.047 | -0.017 | -0.175 | -0.124 | -0.047 | 0.008  | -0.022 | -0.089 | -0.072 | -0.148 | -0.061 | -0.059 | -0.005 | -0.043 | -5.503 | 0.082   | -0.097 |  | 1 |
| JW0418 | b0428 | cyoE        | 6  | 0.009  | -0.049 | -0.048 | -0.150 | -0.175 | -0.093 | 0.085  | -0.090 | -0.014 | 0.062  | 0.037  | -0.220 | 0.008  | 0.137  | 0.012  | 0.056  | 0.014  | 0.008  | -0.154 | 0.176  | -0.082  | -0.061 |  | 1 |
| JW0419 | b0429 | cyoD        | 6  | 0.025  | 0.029  | 0.055  | -0.378 | -0.543 | -0.260 | 0.184  | -0.507 | -0.296 | 0.055  | -0.001 | -0.125 | 0.037  | 0.069  | 0.127  | 0.166  | -0.220 | -0.076 | -0.062 | 0.227  | 0.239   | 0.205  |  | 1 |
| JW0420 | b0430 | cyoC        | 6  | -0.207 | -0.119 | -0.148 | -0.058 | 0.117  | -0.123 | -0.083 | 0.091  | 0.164  | -0.072 | -0.099 | 0.117  | -0.071 | -0.030 | 0.032  | -0.085 | 0.183  | 0.268  | -0.149 | 0.224  | 0.093   | 0.078  |  | 1 |
| JW0421 | b0431 | cyoB        | 6  | 0.087  | 0.057  | 0.033  | 0.013  | 0.184  | -0.034 | 0.127  | 0.232  | 0.222  | -0.002 | -0.060 | 0.109  | 0.020  | 0.125  | 0.043  | 0.115  | 0.207  | 0.208  | 0.082  | 0.128  | 0.135   | 0.229  |  | 1 |
| JW0422 | b0432 | cyoA        | 6  | 0.063  | 0.089  | 0.032  | -0.043 | -0.015 | -0.066 | 0.133  | 0.145  | 0.144  | 0.147  | 0.046  | 0.179  | 0.273  | 0.208  | 0.100  | 0.137  | 0.180  | 0.251  | 0.014  | -0.968 | 0.200   | 0.221  |  | 1 |
| JW0423 | b0433 | ampG        | 14 | 0.108  | -0.111 | -0.127 | -0.073 | 0.021  | -0.185 | -0.007 | 0.032  | 0.045  | -0.035 | -0.059 | 0.033  | 0.337  | 0.095  | 0.010  | 0.108  | 0.083  | 0.110  | -0.191 | 0.089  | 0.045   | 0.073  |  | 1 |
| JW0424 | b0434 | yajG        | 15 | 0.207  | 0.103  | 0.164  | 0.166  | 0.241  | -0.002 | 0.231  | 0.315  | 0.295  | 0.081  | 0.094  | 0.045  | 0.210  | 0.284  | 0.190  | 0.400  | 0.336  | 0.393  | -0.008 | 0.241  | 0.225   | 0.385  |  | 1 |
| JW0425 | b0435 | bolA        | 15 | 0.107  | 0.045  | 0.114  | 0.007  | 0.134  | -0.190 | 0.196  | 0.176  | 0.265  | 0.065  | 0.005  | -0.051 | 0.048  | 0.105  | 0.184  | 0.367  | 0.266  | 0.477  | -0.042 | 0.294  | Invalid | 0.254  |  | 1 |
| JW0426 | b0436 | tig         | 4  | -0.088 | 0.117  | 0.292  | 0.015  | 0.204  | -0.148 | 0.038  | 0.159  | 0.304  | -0.024 | 0.058  | 0.237  | 0.063  | 0.139  | 0.078  | 0.097  | 0.187  | 0.181  | 0.157  | 0.314  | 0.085   | 0.152  |  | 1 |
| JW0427 | b0437 | clpP        | 14 | -0.048 | 0.103  | 0.094  | 0.086  | 0.082  | -0.027 | -0.009 | 0.162  | 0.139  | 0.013  | 0.009  | 0.186  | 0.163  | 0.209  | 0.046  | 0.125  | 0.149  | 0.137  | -0.030 | 0.167  | 0.112   | 0.052  |  | 1 |
| JW0428 | b0438 | clpX        | 14 | 0.227  | 0.121  | 0.027  | 0.017  | 0.050  | -0.056 | -0.083 | 0.071  | 0.020  | -0.063 | -0.010 | 0.094  | 0.097  | 0.083  | 0.018  | 0.103  | 0.128  | 0.106  | 0.046  | 0.133  | 0.150   | 0.031  |  | 1 |
| JW0429 | b0439 | lon         | 9  | 0.049  | 0.022  | 0.043  | -0.103 | -0.025 | -0.042 | 0.013  | 0.030  | 0.015  | -0.056 | -0.035 | -0.034 | 0.070  | 0.229  | 0.042  | 0.127  | 0.142  | 0.023  | -0.078 | 0.099  | 0.088   | 0.015  |  | 1 |
| JW0430 | b0440 | hupB        | 9  | 0.149  | 0.133  | 0.178  | 0.030  | 0.066  | -0.197 | 0.159  | 0.108  | 0.135  | 0.055  | 0.013  | -0.003 | 0.112  | 0.196  | 0.120  | 0.360  | 0.323  | 0.355  | 0.018  | 0.171  | 0.229   | 0.114  |  | 1 |
| JW0431 | b0441 | ybaU / ppiD | 3  | 0.071  | 0.020  | 0.109  | -0.017 | 0.073  | -0.125 | 0.079  | 0.108  | 0.160  | 0.083  | 0.095  | 0.020  | 0.103  | 0.109  | 0.030  | 0.282  | 0.205  | 0.266  | -0.010 | 0.190  | 0.279   | 0.081  |  | 1 |
| JW0432 | b0442 | ybaV        | 15 | -0.316 | -0.013 | 0.027  | -0.031 | -0.087 | -0.182 | -0.159 | 0.160  | 0.122  | 0.095  | 0.137  | 0.047  | -0.015 | -0.139 | -0.005 | 0.181  | 0.341  | 0.062  | -0.093 | 0.157  | -0.155  | 0.153  |  | 1 |
| JW0433 | b0443 | ybaW        | 15 | -0.316 | 0.062  | 0.214  | 0.066  | -0.076 | -0.046 | 0.049  | -0.718 | 0.026  | 0.006  | -0.122 | 0.165  | 0.098  | 0.230  | 0.183  | -0.092 | -0.019 | -0.132 | 0.057  | 0.183  | 0.102   | 0.177  |  | 1 |
| JW0434 | b0444 | ybaX        | 15 | 0.052  | -0.151 | -0.108 | -0.095 | -0.106 | 0.008  | -0.058 | 0.025  | 0.034  | -0.100 | -0.113 | -0.016 | 0.069  | 0.132  | 0.000  | 0.136  | 0.109  | 0.043  | -0.179 | 0.013  | 0.189   | -0.008 |  | 1 |
| JW0435 | b0445 | ybaE        | 15 | -0.426 | -0.221 | -0.134 | -0.191 | -0.270 | -0.204 | -0.114 | -0.159 | 0.057  | -0.216 | -0.224 | 0.028  | -0.102 | -0.212 | -0.044 | -0.119 | -0.089 | -0.040 | -0.204 | -0.002 | 0.094   | 0.026  |  | 1 |
| JW0436 | b0446 | cof         | 15 |        |        |        |        |        |        |        |        |        |        |        |        |        |        |        |        |        |        |        |        |         |        |  |   |

|        |       |            |          |        |        |        |        |        |        |        |        |        |        |        |        |        |        |        |        |        |        |        |        |        |        |   |
|--------|-------|------------|----------|--------|--------|--------|--------|--------|--------|--------|--------|--------|--------|--------|--------|--------|--------|--------|--------|--------|--------|--------|--------|--------|--------|---|
| JW0479 | b0490 | ybbL       | 11       | -0.437 | -0.190 | -0.147 | -0.074 | 0.004  | -0.176 | -0.333 | -0.021 | 0.180  | 0.099  | 0.154  | 0.139  | -0.059 | -0.370 | -0.071 | 0.030  | 0.204  | 0.000  | -0.137 | -0.010 | 0.143  | 0.135  |   |
| JW0480 | b0491 | ybbM       | 15       | 0.236  | 0.090  | 0.135  | 0.126  | 0.071  | 0.070  | 0.111  | -0.034 | 0.065  | 0.109  | 0.092  | -0.023 | 0.195  | 0.262  | 0.170  | 0.018  | 0.223  | 0.113  | 0.053  | 0.252  | 0.261  | 0.159  | 1 |
| JW0481 | b0492 | ybbN       | 15       | 0.038  | -0.080 | 0.104  | 0.052  | -0.007 | -0.178 | -0.113 | -0.129 | 0.046  | 0.152  | 0.011  | 0.124  | 0.097  | 0.124  | 0.048  | 0.038  | 0.315  | 0.044  | 0.005  | 0.180  | 0.158  | 0.018  | 1 |
| JW0482 | b0493 | ybbO       | 7        | 0.193  | -0.142 | -0.110 | 0.000  | 0.056  | 0.010  | -0.041 | -0.135 | 0.089  | 0.007  | -0.088 | -0.221 | -0.151 | -0.094 | -0.181 | -0.038 | 0.326  | 0.065  | -0.168 | -0.119 | 0.078  | -0.041 | 1 |
| JW0483 | b0494 | tesA       | 7        | -0.227 | -0.015 | 0.210  | 0.023  | 0.127  | -0.092 | 0.058  | 0.114  | 0.238  | -0.013 | -0.009 | 0.128  | 0.006  | -0.237 | 0.095  | 0.074  | 0.463  | 0.264  | 0.118  | 0.122  | 0.197  | 0.132  | 1 |
| JW0484 | b0495 | ybbA       | 11       | -0.010 | -0.079 | 0.069  | -0.003 | -0.027 | 0.055  | 0.015  | -0.211 | -0.020 | 0.010  | -0.139 | -0.028 | 0.017  | 0.091  | 0.105  | -0.371 | 0.092  | -0.264 | 0.100  | 0.179  | -0.061 | 0.109  | 1 |
| JW0485 | b0496 | ybbP       | 15       | 0.195  | -0.060 | -0.069 | 0.009  | 0.042  | 0.026  | -0.089 | -0.184 | -0.062 | 0.064  | -0.044 | 0.050  | 0.001  | -0.046 | -0.057 | -0.157 | 0.012  | -0.199 | 0.104  | 0.073  | 0.130  | 0.016  | 1 |
| JW0487 | b0498 | ybbC       | 15       | -3.741 | -3.811 | -4.293 | -4.928 | -4.951 | -0.035 | -3.453 | -5.381 | -4.815 | 0.065  | -4.256 | 0.112  | -3.967 | -4.044 | -3.740 | -4.963 | -5.281 | -5.590 | -3.954 | -5.716 | -4.728 | -4.854 | 1 |
| JW0488 | b0499 | (hseD)     | 15       | 0.223  | -0.099 | -0.188 | -1.321 | -6.619 | 0.095  | -0.060 | -7.021 | -6.534 | 0.187  | -3.259 | 0.230  | -0.103 | 0.090  | -0.059 | -6.415 | -6.508 | -6.947 | -0.202 | -6.688 | -2.987 | -2.860 | 1 |
| JW0489 | b0500 | ybbD       | 15       | 0.553  | 0.055  | 0.137  | -1.039 | -4.280 | 0.101  | 0.158  | -4.349 | -4.031 | 0.094  | -3.462 | -0.055 | 0.013  | 0.125  | 0.134  | -4.314 | -4.384 | -4.801 | 0.161  | -4.690 | -4.269 | -4.370 | 1 |
| JW0490 | b0502 | 156#1      | 15       | 0.195  | 0.174  | 0.207  | -0.921 | -3.664 | 0.025  | 0.189  | -3.000 | -2.967 | 0.210  | 0.003  | 0.120  | 0.148  | 0.165  | 0.113  | -0.093 | -2.969 | -3.162 | 0.144  | -3.540 | -3.103 | -2.999 | 1 |
| JW0492 | b0504 | ybbS       | 9        | 0.063  | -0.010 | -0.108 | -0.208 | -0.262 | 0.010  | 0.008  | -0.141 | -0.067 | -0.038 | -0.041 | -0.126 | -0.102 | -0.085 | -0.104 | -0.158 | 0.071  | -0.075 | -0.099 | 0.005  | 0.142  | -0.204 | 1 |
| JW0493 | b0505 | ybbT       | 15       | Invald | 1 |
| JW0494 | b0506 | ybbU       | 15       | -0.103 | -0.100 | -0.070 | 0.008  | -0.287 | 0.030  | -0.112 | -0.031 | 0.081  | 0.019  | 0.011  | 0.113  | -0.093 | 0.082  | -0.027 | -0.112 | 0.168  | -0.057 | -0.182 | Invald | Invald | -5.618 | 1 |
| JW0495 | b0507 | gcl        | 5        | -0.167 | -0.407 | -0.523 | -0.427 | -0.652 | -0.020 | -0.469 | -0.486 | -0.354 | -0.069 | -0.104 | -0.309 | -0.064 | -0.068 | -0.149 | -0.506 | -0.291 | -0.400 | -0.617 | Invald | -0.274 | -2.499 | 1 |
| JW0496 | b0508 | gjp        | 14       | 0.186  | -0.016 | -0.023 | -0.016 | -0.301 | 0.047  | 0.070  | -0.139 | -0.050 | 0.037  | 0.080  | 0.096  | -0.033 | 0.076  | -0.019 | -0.114 | -0.063 | -0.118 | -0.061 | -1.769 | 0.199  | -0.105 | 1 |
| JW0497 | b0509 | ybbQ       | 15       | -0.476 | -0.173 | -0.232 | -0.414 | -0.788 | -0.072 | -0.086 | -0.668 | -0.326 | 0.184  | 0.087  | 0.121  | -0.041 | 0.008  | -0.006 | -0.414 | -0.313 | -0.415 | -0.266 | -5.833 | -0.297 | -4.764 | 1 |
| JW0498 | b0510 | ybbV       | 15       | 0.192  | 0.077  | 0.064  | 0.088  | 0.027  | -0.030 | 0.020  | 0.334  | 0.356  | 0.005  | 0.073  | -0.039 | -1.643 | -1.379 | -1.536 | 0.438  | 0.283  | 0.529  | 0.039  | -5.645 | 0.264  | -5.259 | 1 |
| JW0499 | b0511 | allP       | 11       | -0.449 | 0.114  | -0.587 | -0.403 | -0.594 | -0.171 | -0.315 | -0.230 | 0.003  | 0.076  | 0.061  | 0.326  | -6.380 | -6.521 | -6.006 | -0.241 | -0.137 | -0.208 | -0.339 | -7.948 | -0.155 | -6.981 | 1 |
| JW0500 | b0512 | allA       | 8        | -0.125 | -0.028 | -0.063 | -0.077 | -0.229 | 0.064  | 0.043  | -0.087 | -0.001 | 0.152  | 0.032  | -0.086 | -4.291 | -4.329 | -4.320 | -0.046 | 0.099  | 0.089  | -0.072 | -5.043 | -0.036 | -4.448 | 1 |
| JW0501 | b0513 | ybbY       | 15       | 0.016  | -0.179 | -0.194 | -0.093 | -0.223 | -0.051 | -0.064 | 0.035  | 0.091  | -0.017 | -0.092 | 0.055  | -6.534 | -6.148 | -5.939 | -0.119 | 0.137  | -0.002 | -0.149 | -6.430 | -0.025 | -0.757 | 1 |
| JW0502 | b0514 | ybbZ       | 15       | 0.030  | -0.091 | -0.040 | -0.018 | -0.247 | -0.072 | -0.124 | -0.141 | 0.021  | -0.083 | -0.084 | -0.060 | -6.101 | -5.974 | -6.252 | -0.174 | 0.012  | -0.030 | -0.014 | -5.888 | -0.012 | -5.850 | 1 |
| JW0503 | b0515 | ybbA       | 15       | -0.155 | -0.205 | -0.095 | -0.091 | -0.429 | -0.051 | -0.071 | -0.191 | -0.043 | 0.066  | 0.021  | -0.074 | -5.957 | -5.019 | -4.668 | 0.056  | 0.031  | 0.042  | -0.249 | -0.412 | -0.022 | -5.540 | 1 |
| JW0504 | b0516 | allC       | 15       | -0.174 | -0.043 | -0.261 | -0.053 | -0.350 | 0.115  | -0.101 | -0.023 | -0.035 | -0.362 | -0.390 | -0.243 | -4.974 | 0.125  | 0.032  | -0.016 | 0.039  | -0.099 | -0.326 | -0.076 | -0.112 | -5.271 | 1 |
| JW0505 | b0517 | ybbC       | 15       | 0.178  | 0.016  | 0.165  | 0.085  | -0.259 | 0.147  | 0.197  | 0.119  | -0.040 | -0.084 | -0.099 | 0.002  | -3.713 | 0.206  | 0.126  | 0.066  | 0.122  | -0.008 | 0.073  | -3.628 | 0.112  | -4.148 | 1 |
| JW0506 | b0518 | fdra       | 4        | 0.103  | -0.159 | -0.213 | -0.151 | -0.265 | -0.343 | -0.167 | -0.002 | -0.019 | -0.040 | -0.019 | -0.393 | -0.273 | -0.170 | -0.229 | -0.039 | 0.033  | 0.016  | -0.318 | -4.792 | -0.120 | -4.339 | 1 |
| JW0507 | b0519 | (ybbE)     | 15       | -0.129 | -0.067 | 0.122  | 0.138  | -0.297 | -0.222 | -0.063 | 0.230  | 0.076  | -0.046 | -0.054 | -0.395 | -0.245 | -0.218 | -0.152 | 0.152  | 0.262  | 0.193  | -0.018 | -4.987 | -0.344 | 0.017  | 1 |
| JW0508 | b0519 | ybbE       | 15       | -0.026 | 0.068  | 0.097  | 0.218  | -0.181 | -0.276 | -0.119 | 0.048  | 0.088  | -0.011 | -0.002 | 0.065  | -0.456 | -0.417 | -0.513 | -0.013 | -0.004 | -0.028 | 0.047  | -5.634 | -0.133 | 0.045  | 1 |
| JW0509 | b0520 | ybbF       | 15       | 0.274  | -0.148 | -0.114 | 0.051  | -0.320 | -0.381 | -0.261 | -0.140 | -0.094 | -0.142 | -0.187 | -0.044 | -0.719 | -0.806 | -0.891 | -0.025 | 0.093  | 0.039  | -0.171 | -0.309 | -0.152 | -0.574 | 1 |
| JW0510 | b0521 | arcC       | 5        | 0.216  | -0.162 | -0.115 | 0.115  | -0.200 | -0.163 | -0.170 | 0.011  | -0.072 | -0.115 | -0.070 | -0.125 | 0.029  | -0.120 | -0.157 | -0.090 | 0.077  | -0.088 | -0.255 | -0.017 | -0.272 | -0.165 | 1 |
| JW0511 | b0522 | purK       | 8        | 0.004  | -0.070 | -0.141 | -0.087 | -0.306 | -0.292 | -0.108 | -0.064 | -0.204 | -0.151 | -0.235 | -0.122 | 0.058  | -0.057 | -0.023 | -0.271 | 0.044  | -0.121 | 0.018  | 0.130  | -0.148 | 0.014  | 1 |
| JW0512 | b0523 | purE       | 8        | 0.226  | 0.042  | -0.033 | 0.124  | 0.262  | -0.069 | 0.015  | 0.163  | 0.071  | -0.148 | -0.138 | -0.056 | 0.331  | -0.184 | -0.197 | 0.017  | 0.241  | 0.045  | 0.108  | -0.104 | -0.025 | -0.135 | 1 |
| JW0513 | b0524 | ybbF       | 15       | 0.110  | -0.160 | -0.261 | -0.066 | 0.023  | -0.110 | -0.091 | -0.039 | -0.014 | -0.192 | -0.201 | -0.212 | 0.003  | -0.235 | -0.199 | -0.040 | 0.073  | -0.059 | -0.063 | -0.039 | -0.193 | -0.030 | 1 |
| JW0514 | b0525 | ppbB       | 12       | 0.314  | 0.072  | -0.056 | 0.027  | 0.278  | -0.065 | 0.178  | -0.064 | 0.256  | -0.002 | 0.006  | -0.013 | 0.121  | -0.033 | -0.037 | 0.012  | 0.337  | 0.126  | 0.071  | 0.230  | 0.107  | 0.123  | 1 |
| JW0515 | b0526 | cysS       | 12       | -0.170 | -0.105 | -0.005 | -0.026 | -0.073 | -0.241 | -0.110 | -0.102 | -0.015 | -0.069 | -0.005 | 0.062  | -0.031 | -0.334 | 0.000  | -0.140 | -0.113 | -0.070 | 0.081  | -0.013 | -0.029 | 0.121  | 1 |
| JW0516 | b0527 | ybbL       | 15       | 0.315  | 0.022  | -0.003 | 0.243  | 0.210  | -0.026 | 0.123  | 0.058  | 0.157  | 0.065  | -0.012 | 0.029  | 1.297  | 0.163  | 0.168  | 0.160  | 0.269  | 0.108  | -0.046 | 0.025  | 0.059  | -0.014 | 1 |
| JW0517 | b0528 | ybcJ       | 15       | 0.400  | 0.154  | 0.246  | 0.246  | 0.279  | -0.141 | 0.218  | 0.330  | 0.208  | 0.085  | 0.080  | -0.229 | 0.168  | 0.156  | 0.248  | 0.244  | 0.238  | 0.122  | 0.110  | 0.102  | -0.198 | 1      |   |
| JW0518 | b0529 | fold / ads | 2        | -0.333 | -0.209 | -0.127 | 0.040  | -0.238 | -0.246 | -0.114 | -0.154 | -0.057 | -0.089 | 0.045  | -0.060 | 0.064  | -0.246 | -0.014 | -0.227 | -0.046 | -0.172 | 0.003  | -0.036 | -0.254 | -0.256 | 1 |
| JW0519 | b0530 | sfmA       | 3        | 0.088  | 0.055  | 0.039  | -0.611 | -1.981 | -0.151 | 0.026  | -2.093 | -1.890 | -0.059 | 0.050  | 0.078  | 0.082  | 0.063  | 0.091  | -2.125 | -1.752 | -2.001 | 0.110  | 0.163  | -2.098 | -1.997 | 1 |
| JW0520 | b0531 | sfmC       | 3        | 0.213  | 0.107  | 0.047  | -0.590 | -2.107 | -0.105 | 0.051  | -2.053 | -2.067 | -0.008 | 0.086  | 0.108  | 0.667  | 0.124  | 0.118  | -2.226 | -1.755 | -1.889 | 0.078  | 0.114  | -2.062 | -1.950 | 1 |
| JW0521 | b0532 | sfmD       | 3        | 0.181  | 0.030  | -0.049 | -0.987 | -6.617 | 0.019  | 0.051  | -5.810 | -6.410 | 0.005  | -0.029 | -0.108 | -0.027 | -4.627 | -4.651 | -6.463 | -5.748 | -6.061 | 0.023  | -2.281 | -2.199 | -0.723 | 1 |
| JW0522 | b0533 | sfmH       | 3        | 0.060  | 0.021  | 0.015  | -0.609 | -2.328 | -0.057 | 0.194  | -1.884 | -2.267 | -0.067 | -0.081 | -0.120 | 0.140  | -1.738 | -1.940 | -2.342 | -1.924 | -2.140 | 0.100  | -1.930 | -0.089 | 0.049  | 1 |
| JW0523 | b0534 | sfmF       | 3        | -0.100 | 0.067  | -0.131 | -1.052 | -5.331 | 0.015  | 0.067  | -5.075 | -5.074 | 0.004  | -0.034 | -0.023 | -0.007 | -4.096 | -4.240 | -5.510 | -5.143 | -5.542 | -0.058 | -5.275 | 0.046  | -0.035 | 1 |
| JW0524 | b0535 | fimZ       | 15       | -0.152 | 0.218  | 0.263  | -0.827 | -5.839 | -0.018 | 0.147  | -5.856 | -5.171 | 0.067  | 0.162  | 0.206  | 0.245  | -0.143 | 0.070  | -5.748 | -5.718 | -6.094 | 0.181  | -1.276 | 0.363  | 0.106  | 1 |
| JW0525 | b0537 | intD       | 14 DLP12 | -3.149 | 0.221  | 0.044  | -0.469 | -1.916 | -3.572 | 0.078  | -1.551 | -1.591 | -3.565 | -3.562 | -5.012 | -5.126 | -5.426 | -4.320 | -1.474 | -1.275 | -1.706 | 0.138  | -4.605 | -3.923 | -4.622 | 1 |
| JW0526 | b0539 | EXO_LAMBD  | 14 DLP12 | 1.907  | 1.253  | -0.223 | -0.765 | -5.173 | -0.185 | 0.983  | 1.152  | 0.540  | -0.127 | -0.067 | -4.834 | -5.141 | -4.964 | -0.435 | -0.019 | 1.195  | 0.255  | 0.720  | -4.945 | 0.361  | -4.746 | 1 |
| JW0527 | b0540 | VRPP_LAMBD | 15 DLP12 | 1.127  | 1.606  | -0.574 | -0.381 | -0.660 | -5.187 | 0.488  | 0.886  | -4.534 | -0.216 | -0.497 | -4.050 | -4.495 | -4.112 | -4.302 | -0.031 | 0.506  | -0.412 | 0.131  | -4.401 | -4.219 | -4.372 | 1 |
| JW0531 | b05   |            |          |        |        |        |        |        |        |        |        |        |        |        |        |        |        |        |        |        |        |        |        |        |        |   |

|          |       |        |    |         |         |         |         |         |         |         |         |         |         |         |         |         |         |         |         |         |         |         |         |         |         |         |   |
|----------|-------|--------|----|---------|---------|---------|---------|---------|---------|---------|---------|---------|---------|---------|---------|---------|---------|---------|---------|---------|---------|---------|---------|---------|---------|---------|---|
| JW0578   | b0586 | entF   | 2  | 0.162   | -0.113  | -0.024  | -0.095  | -0.139  | 0.008   | 0.051   | -0.269  | -0.076  | 0.051   | -0.009  | -0.014  | -0.096  | -0.138  | -0.177  | -0.254  | -0.089  | -0.180  | 0.065   | -0.037  | -6.509  | -0.126  | 1       |   |
| JW0579   | b0587 | fepE   | 11 | 0.235   | -0.083  | 0.088   | -0.117  | -0.199  | 0.031   | 0.194   | -0.328  | -0.188  | 0.050   | 0.031   | -0.125  | -0.117  | -0.132  | -0.220  | -0.332  | -0.427  | -0.183  | 0.176   | -0.193  | -6.012  | -0.140  | 1       |   |
| JW0580   | b0588 | fepC   | 11 | -0.143  | -0.235  | 0.014   | -0.184  | -0.340  | -0.082  | 0.062   | -0.377  | -0.183  | 0.085   | -0.034  | -0.070  | -0.211  | -0.129  | -0.175  | -0.248  | -0.409  | -0.097  | 0.037   | -0.044  | -6.304  | -0.199  | 1       |   |
| JW0581   | b0589 | fepG   | 11 | -0.081  | -0.150  | 0.177   | 0.015   | -0.247  | -0.159  | 0.063   | -0.407  | -0.096  | 0.078   | -0.039  | -0.060  | -0.199  | -0.236  | -0.183  | -0.195  | -0.051  | -0.350  | 0.163   | -0.065  | -6.388  | -0.147  | 1       |   |
| JW0582   | b0590 | fepD   | 11 | 0.160   | -0.225  | 0.014   | -0.042  | -0.178  | -0.103  | -0.037  | -0.270  | -0.139  | 0.012   | -0.061  | -0.262  | -0.078  | -0.156  | -0.192  | -0.251  | -0.123  | -0.310  | 0.058   | -0.065  | -3.528  | -0.177  | 1       |   |
| JW0583   | b0591 | ybdA   | 14 | 0.308   | 0.042   | 0.048   | -0.102  | -0.240  | 0.051   | 0.067   | -0.279  | -0.232  | 0.063   | -0.020  | -0.083  | 0.152   | 0.198   | 0.034   | -0.167  | -0.140  | -0.353  | 0.003   | 0.038   | 0.085   | 0.003   | 1       |   |
| JW0584   | b0592 | fepB   | 11 | 0.338   | -0.050  | 0.044   | 0.068   | 0.040   | -0.006  | 0.007   | -0.107  | -0.031  | 0.010   | -0.029  | -0.314  | -0.035  | -0.034  | -0.155  | -0.025  | 0.011   | -0.086  | 0.084   | -0.095  | -0.075  | -0.179  | 1       |   |
| JW0584.5 | 165#7 |        | 15 | -1.420  | 0.191   | 0.259   | -0.550  | -2.622  | -0.069  | 0.201   | -2.319  | -2.383  | -0.338  | -0.211  | -1.603  | 0.155   | 0.158   | 0.136   | -2.765  | -3.085  | -3.094  | 0.257   | -0.394  | -0.053  | -0.142  | 1       |   |
| JW0585   | b0593 | entC   | 2  | 0.207   | -0.048  | 0.028   | 0.105   | 0.149   | -0.061  | -0.021  | 0.098   | 0.161   | -0.005  | -0.028  | -0.356  | -0.038  | -0.147  | -0.080  | 0.162   | 0.111   | 0.056   | 0.051   | 0.090   | -0.036  | -0.136  | 1       |   |
| JW0586   | b0594 | entE   | 2  | -0.177  | -0.171  | -0.158  | -0.225  | -0.226  | -0.140  | -0.113  | -0.266  | -0.182  | -0.087  | -0.089  | -0.080  | 0.223   | -0.274  | -0.128  | -0.332  | -0.231  | -0.306  | 0.039   | -0.020  | -0.312  | -0.157  | 1       |   |
| JW0587   | b0595 | entB   | 2  | 0.196   | -0.100  | -0.054  | 0.042   | 0.061   | 0.016   | 0.013   | -0.059  | 0.029   | 0.063   | -0.016  | -0.015  | 0.043   | 0.036   | -0.021  | -0.002  | 0.102   | -0.003  | -0.050  | 0.111   | 0.034   | 0.002   | 1       |   |
| JW0588   | b0596 | entA   | 2  | 0.274   | 0.065   | 0.144   | 0.052   | 0.120   | -0.014  | 0.180   | -0.064  | 0.058   | -0.012  | -0.029  | -0.228  | 0.094   | 0.099   | 0.048   | -0.123  | -0.108  | -0.068  | 0.206   | 0.196   | -0.082  | -0.073  | 1       |   |
| JW0589   | b0597 | ybdB   | 15 | Invalid | 1 |
| JW0590   | b0598 | cstA   | 14 | -0.071  | -0.414  | -0.224  | -0.233  | -0.025  | -0.022  | -0.069  | -0.212  | -0.017  | 0.020   | -0.055  | -0.423  | -0.339  | -0.792  | -0.453  | -0.442  | 0.006   | -0.310  | -0.275  | -0.248  | -0.217  | -0.413  | 1       |   |
| JW0592   | b0599 | ybdH   | 15 | 0.061   | -0.081  | -0.697  | -0.401  | -0.187  | -0.086  | -0.243  | -0.240  | -0.213  | 0.008   | -0.049  | -0.231  | -0.183  | -0.199  | -0.178  | -0.526  | -0.109  | -0.241  | -0.141  | -0.007  | -0.007  | -0.098  | 1       |   |
| JW0593   | b0600 | ybdL   | 1  | 0.041   | 0.011   | -6.369  | -1.159  | -0.335  | 0.040   | 0.072   | -0.428  | -0.325  | 0.006   | 0.002   | -0.226  | 0.079   | 0.131   | 0.046   | -0.486  | -0.481  | -0.455  | -0.015  | 0.161   | -0.033  | 0.056   | 1       |   |
| JW0594   | b0601 | ybdM   | 15 | 0.198   | 0.152   | -4.802  | -0.903  | 0.018   | 0.018   | 0.133   | -0.070  | -0.045  | 0.065   | -0.018  | -0.232  | 0.216   | 0.485   | 0.216   | -0.056  | -0.007  | -0.058  | 0.066   | 0.163   | 0.242   | 0.182   | 1       |   |
| JW0595   | b0602 | ybdN   | 15 | 0.158   | 0.097   | -0.788  | -0.515  | -0.413  | -0.034  | 0.149   | -0.523  | -0.442  | 0.128   | 0.030   | 0.007   | 0.097   | 0.109   | 0.042   | -0.453  | -0.446  | -0.497  | 0.052   | 0.083   | 0.223   | -0.041  | 1       |   |
| JW0596   | b0603 | ybdO   | 9  | 0.184   | -0.110  | -0.291  | -1.054  | -2.701  | -0.133  | 0.011   | -2.619  | -2.339  | -0.009  | 0.089   | -0.220  | -0.171  | -0.131  | -0.109  | -2.536  | -2.272  | -2.506  | -0.119  | 0.079   | 0.009   | -4.525  | 1       |   |
| JW0597   | b0604 | dsbC   | 3  | -0.245  | -0.102  | -0.175  | -0.095  | -0.096  | -0.116  | -0.115  | -0.168  | -0.017  | 0.032   | 0.126   | 0.082   | 0.049   | 0.118   | 0.153   | -0.162  | -0.145  | -0.211  | -0.109  | 0.104   | 0.260   | 0.147   | 1       |   |
| JW0598   | b0605 | ahpC   | 4  | 0.160   | 0.138   | 0.201   | 0.285   | 0.360   | 0.048   | 0.137   | 0.294   | 0.304   | 0.130   | 0.075   | 0.218   | 0.199   | 0.310   | 0.192   | 0.198   | 0.247   | 0.342   | 0.096   | 0.237   | 0.259   | 0.176   | 1       |   |
| JW0599   | b0606 | ahpF   | 4  | 0.274   | 0.134   | 0.141   | 0.195   | 0.246   | 0.048   | 0.146   | 0.172   | 0.122   | 0.089   | 0.024   | 0.060   | 0.223   | 0.149   | 0.119   | 0.216   | 0.277   | 0.176   | 0.184   | 0.231   | 0.160   | 0.140   | 1       |   |
| JW0600   | b0607 | ybdQ   | 15 | 0.219   | 0.109   | 0.122   | -0.184  | -0.694  | 0.006   | 0.174   | -0.736  | -0.565  | -0.018  | 0.015   | -0.081  | 0.097   | 0.045   | 0.139   | -0.665  | -0.685  | -0.702  | 0.043   | 0.146   | 0.111   | 0.050   | 1       |   |
| JW0601   | b0608 | ybdR   | 6  | 0.037   | -0.015  | -0.074  | -0.730  | -2.380  | -0.049  | -0.014  | -2.313  | -2.250  | 0.015   | 0.040   | -0.610  | 0.021   | 0.029   | 0.003   | -2.428  | -2.164  | -2.311  | -0.295  | 0.041   | 0.019   | -0.080  | 1       |   |
| JW0602   | b0610 | rnk    | 8  | 0.108   | 0.125   | 0.094   | 0.173   | 0.424   | -0.057  | 0.115   | 0.322   | 0.356   | -0.065  | -0.047  | -3.995  | 0.049   | 0.016   | 0.166   | 0.234   | 0.312   | 0.355   | 0.240   | 0.076   | 0.316   | 0.237   | 1       |   |
| JW0603   | b0611 | rna    | 8  | 0.259   | 0.091   | 0.038   | -0.017  | 0.136   | 0.037   | 0.172   | -0.076  | 0.044   | -0.078  | -0.073  | -5.584  | 0.035   | 0.158   | 0.072   | -0.337  | 0.113   | -0.121  | 0.041   | 0.145   | 0.238   | 0.167   | 1       |   |
| JW0604   | b0612 | citT   | 11 | 0.194   | 0.036   | -0.089  | 0.004   | -0.038  | 0.065   | 0.085   | -0.020  | -0.131  | 0.115   | 0.004   | -6.188  | 0.120   | 0.073   | 0.001   | -0.166  | -0.045  | -0.099  | 0.091   | 0.172   | 0.111   | 0.174   | 1       |   |
| JW0605   | b0613 | citG   | 15 | 0.130   | -0.123  | -0.152  | -0.101  | -0.001  | 0.169   | -0.038  | -0.083  | -0.178  | -0.116  | -0.055  | -5.120  | 0.003   | -0.020  | -0.077  | -0.135  | -0.221  | -0.264  | -0.052  | -0.153  | -0.143  | 0.100   | 1       |   |
| JW0606   | b0614 | citX   | 6  | 0.246   | 0.026   | 0.106   | 0.047   | 0.079   | -0.043  | 0.171   | -0.106  | -0.026  | -0.111  | -0.099  | -4.369  | -0.032  | -0.078  | -0.106  | -0.145  | -0.015  | -0.095  | 0.221   | 0.035   | 0.051   | 0.040   | 1       |   |
| JW0607   | b0615 | citF   | 6  | 0.095   | -0.045  | -0.079  | 0.056   | 0.207   | 0.043   | 0.059   | 0.121   | 0.089   | 0.079   | -0.035  | -4.678  | 0.118   | -0.017  | -0.090  | 0.127   | 0.176   | -0.050  | 0.109   | 0.183   | 0.102   | 0.086   | 1       |   |
| JW0608   | b0616 | citE   | 6  | 0.235   | 0.039   | -0.505  | -0.074  | 0.193   | 0.105   | 0.051   | 0.126   | -0.014  | 0.016   | 0.033   | -2.100  | 0.231   | 0.105   | 0.040   | 0.093   | 0.115   | 0.015   | 0.119   | 0.117   | 0.091   | 0.014   | 1       |   |
| JW0609   | b0617 | citD   | 6  | 0.651   | 0.536   | 0.782   | 0.662   | 0.668   | 0.182   | 0.440   | 0.645   | 0.708   | 0.226   | 0.209   | -2.315  | 0.286   | 0.139   | 0.356   | 0.391   | 0.471   | 0.358   | 0.764   | 0.321   | 0.514   | 0.347   | 1       |   |
| JW0610   | b0618 | citC   | 6  | 0.275   | 0.132   | 0.125   | 0.324   | 0.389   | 0.090   | 0.050   | 0.317   | 0.184   | 0.032   | 0.057   | -5.255  | 0.113   | 0.137   | 0.076   | 0.272   | 0.293   | 0.162   | 0.119   | 0.193   | 0.048   | 0.064   | 1       |   |
| JW0611   | b0619 | citA   | 11 | 0.210   | 0.090   | 0.124   | 0.106   | -0.146  | -0.025  | 0.054   | -0.067  | -0.127  | 0.091   | 0.069   | -0.412  | 0.082   | 0.120   | 0.101   | -0.073  | -0.101  | -0.117  | 0.078   | -4.031  | 0.019   | -0.038  | 1       |   |
| JW0612   | b0620 | citB   | 11 | 0.050   | -0.070  | -0.012  | 0.007   | 0.094   | -0.004  | 0.021   | 0.016   | 0.104   | 0.075   | 0.127   | -0.049  | 0.076   | 0.065   | 0.041   | 0.205   | 0.060   | 0.168   | -0.044  | -1.043  | 0.028   | 0.094   | 1       |   |
| JW0613   | b0621 | (dcbC) | 14 | -0.553  | -0.418  | -0.440  | -0.391  | -0.541  | -0.694  | 0.335   | -0.491  | -0.421  | -0.422  | -0.424  | -2.455  | -0.499  | -0.511  | -0.431  | -0.463  | -0.481  | -0.355  | -0.353  | -0.356  | -0.372  | -0.321  | 1       |   |
| JW0616   | b0621 | dcbC   | 2  | -0.237  | -0.406  | -0.408  | -0.366  | -0.439  | -0.621  | 0.300   | -0.447  | -0.468  | -0.454  | -0.381  | -5.094  | -0.386  | -0.397  | -0.391  | -0.468  | -0.550  | -0.373  | -0.349  | -0.320  | -0.311  | -0.423  | 1       |   |
| JW0617   | b0622 | crcA   | 15 | 0.230   | 0.166   | 0.048   | -0.269  | -0.617  | 0.117   | 0.170   | -0.253  | -0.807  | -0.030  | -0.007  | -0.038  | 0.104   | 0.243   | 0.175   | -0.340  | -0.277  | -0.307  | 0.055   | 0.274   | 0.171   | 0.063   | 1       |   |
| JW0618   | b0623 | cspE   | 14 | 0.331   | 0.178   | 0.221   | 0.152   | 0.264   | 0.050   | 0.249   | 0.181   | 0.150   | 0.027   | 0.124   | 0.037   | 0.189   | 0.248   | 0.142   | 0.290   | 0.185   | 0.334   | 0.212   | 0.230   | 0.421   | 0.192   | 1       |   |
| JW0619   | b0624 | crcB   | 15 | 0.036   | -0.197  | -0.306  | -0.084  | 0.031   | 0.055   | -0.047  | -0.025  | -0.003  | 0.007   | -0.031  | -0.320  | -0.187  | -0.073  | -0.149  | 0.150   | -0.015  | -0.015  | -0.270  | -0.053  | 0.098   | -0.043  | 1       |   |
| JW0620   | b0625 | ybeH   | 15 | 0.105   | -0.053  | -0.008  | 0.116   | 0.209   | -0.034  | -0.061  | 0.209   | 0.006   | -0.118  | -0.121  | 0.038   | -0.020  | 0.047   | -0.037  | 0.018   | 0.410   | 0.261   | 0.017   | 0.139   | 0.084   | 0.058   | 1       |   |
| JW0621   | b0626 | ybeM   | 15 | 0.321   | 0.037   | 0.086   | 0.236   | 0.411   | 0.046   | 0.011   | 0.234   | 0.210   | -0.005  | 0.028   | -0.015  | 0.022   | 0.065   | 0.052   | 0.176   | 0.198   | 0.229   | 0.104   | 0.245   | 0.272   | 0.084   | 1       |   |
| JW0622   | b0627 | ybeC   | 11 | 0.318   | 0.114   | 0.123   | 0.268   | 0.377   | 0.084   | 0.188   | 0.281   | 0.260   | 0.071   | 0.055   | 0.077   | 0.125   | 0.190   | 0.117   | 0.296   | 0.306   | 0.312   | 0.103   | 0.363   | 0.578   | 0.281   | 1       |   |
| JW0623   | b0628 | lipA   | 2  | 0.237   | 0.191   | 0.219   | 0.282   | 0.362   | 0.034   | 0.273   | 0.254   | 0.259   | 0.075   | 0.027   | 0.032   | 0.186   | 0.204   | 0.152   | 0.351   | 0.243   | 0.323   | 0.187   | 0.193   | 0.333   | 0.250   | 1       |   |
| JW0624   | b0629 | ybeF   | 15 | 0.079   | 0.167   | 0.132   | -0.595  | -2.038  | 0.017   | 0.165   | -2.015  | -1.913  | 0.050   | 0.081   | -0.110  | 0.091   | 0.115   | 0.159   | -1.424  | -2.041  | -1.307  | 0.133   | 0.239   | 0.180   | 0.151   | 1       |   |
| JW0625   | b0630 | lipB   | 2  | -0.004  | 0.069   | 0.101   | 0.213   | 0.185   | -0.078  | 0.066   | 0.289   | 0.307   | 0.137   | 0.163   | 0.270   | 0.049   | 0.115   | 0.111   | 0.346   | 0.247   | 0.331   | 0.075   | 0.212   | 0.310   | 0.283   | 1       |   |
| JW0626   | b0631 | ybeD   | 15 | 0.040   | 0.160   | 0.061   | 0.231   | 0.284   | 0.022   | 0.087   | 0.251   | 0.286   | 0.148   | 0.120   | 0.197   | 0.240   | 0.302   | 0.162   | 0.313   | 0.277   | 0.414   | -0.019  | 0.254   | 0.269   | 0.193   | 1       |   |
| JW0627   | b0632 | dacA   | 3  | 0.18    |         |         |         |         |         |         |         |         |         |         |         |         |         |         |         |         |         |         |         |         |         |         |   |

|        |         |        |    |        |        |        |        |        |        |        |        |        |        |        |        |        |        |        |        |        |        |        |        |        |        |   |   |
|--------|---------|--------|----|--------|--------|--------|--------|--------|--------|--------|--------|--------|--------|--------|--------|--------|--------|--------|--------|--------|--------|--------|--------|--------|--------|---|---|
| JW0671 | b0684   | fldA   | 6  | 0.405  | 0.230  | 0.261  | 0.275  | 0.341  | 0.000  | 0.105  | 0.142  | 0.190  | 0.061  | 0.143  | 0.148  | 0.210  | 0.152  | 0.158  | 0.097  | 0.149  | 0.184  | 0.232  | 0.271  | 0.265  | 0.192  |   |   |
| JW0672 | b0685   | (ybfE) | 15 | 0.371  | 0.192  | 0.152  | 0.304  | 0.366  | 0.056  | 0.153  | 0.197  | 0.235  | 0.110  | 0.105  | 0.111  | 0.189  | 0.231  | 0.196  | 0.188  | 0.234  | 0.319  | 0.182  | 0.266  | 0.280  | 0.252  |   | 1 |
| JW0673 | b0686   | ybfF   | 15 | 0.208  | 0.127  | 0.040  | 0.017  | -0.037 | -0.038 | 0.154  | 0.130  | -0.087 | -0.034 | -0.086 | -0.073 | 0.114  | 0.058  | 0.087  | 0.142  | 0.119  | 0.084  | 0.047  | 0.211  | 0.185  | 0.130  |   | 1 |
| JW0674 | b0687   | seqA   | 10 | 0.337  | 0.196  | 0.267  | 0.313  | 0.433  | -0.025 | 0.256  | 0.292  | 0.417  | 0.049  | 0.071  | -0.049 | 0.367  | 0.112  | 0.111  | 0.381  | 0.392  | 0.373  | 0.271  | 0.226  | 0.305  | 0.158  |   | 1 |
| JW0675 | b0688   | pgm    | 6  | -0.246 | -0.226 | -0.243 | -0.029 | -0.662 | -0.109 | -0.225 | -0.016 | 0.089  | -0.122 | -0.124 | 0.085  | -0.251 | -0.449 | -0.115 | -0.136 | -0.020 | 0.097  | -0.060 | -0.119 | -0.178 | 0.022  |   | 1 |
| JW0677 | b0690   | ybfG   | 15 | -4.439 | -4.359 | -4.985 | -4.840 | -4.302 | -0.103 | -4.170 | -4.708 | -4.219 | 0.016  | 0.133  | -4.761 | -4.501 | -4.087 | -4.762 | -4.468 | -4.872 | -4.156 | -4.854 | -4.556 | -4.549 |        | 1 |   |
| JW0678 | b0691   | ybfH   | 15 | -3.467 | -3.464 | -4.078 | -3.892 | -3.390 | 0.087  | -3.255 | -3.643 | -3.753 | 0.133  | 0.076  | 0.155  | -3.644 | -3.525 | -3.281 | -3.750 | -3.723 | -3.899 | -3.375 | -3.783 | -3.508 | -3.488 |   | 1 |
| JW0679 | b0692   | potE   | 11 | 0.174  | -0.193 | -0.367 | -0.173 | 0.022  | 0.178  | -0.149 | 0.013  | -0.144 | 0.048  | 0.083  | 0.101  | -0.121 | -0.071 | -0.124 | -0.115 | -0.151 | -0.250 | -0.305 | -0.020 | -0.004 | -0.029 |   | 1 |
| JW0680 | b0693   | speF   | 5  | -0.294 | -0.543 | -0.769 | -0.167 | 0.027  | 0.157  | -0.511 | -0.573 | -0.036 | 0.131  | 0.090  | 0.111  | -0.396 | -0.358 | -0.426 | -0.674 | -0.485 | -0.665 | -0.636 | -0.306 | -0.008 | -0.264 |   | 1 |
| JW0681 | b0694   | ybfK   | 15 | -2.970 | -3.221 | -4.185 | -0.581 | 0.558  | 0.073  | -3.171 | -3.460 | 0.421  | -0.106 | 0.065  | -0.164 | -3.460 | -3.345 | -3.332 | -3.359 | -3.407 | -3.859 | -3.435 | -3.662 | 0.209  | -3.229 |   | 1 |
| JW0682 | b0694   | kdpE   | 9  | -0.134 | -0.318 | -0.377 | -0.425 | -0.347 | 0.070  | -0.243 | -0.282 | -0.476 | -0.031 | 0.029  | -0.146 | -0.370 | -0.450 | -0.422 | -0.375 | -0.268 | -0.420 | -0.353 | 0.087  | -0.239 | 0.012  |   | 1 |
| JW0683 | b0695   | kdpD   | 9  | 0.135  | -0.177 | -0.219 | -0.162 | -0.157 | 0.179  | -0.130 | -0.132 | -0.317 | 0.011  | -0.002 | -0.101 | -0.121 | -0.157 | -0.191 | -0.231 | -0.161 | -0.343 | -0.028 | -0.120 | -0.291 | -0.163 |   | 1 |
| JW0684 | b0696   | kdpC   | 11 | -0.663 | -0.322 | -0.225 | -0.256 | -0.347 | -0.117 | -0.434 | -0.294 | -0.188 | 0.102  | 0.099  | 0.046  | -0.170 | -0.639 | -0.287 | -0.359 | -0.156 | -0.387 | -0.218 | -0.229 | -0.164 | -0.192 |   | 1 |
| JW0685 | b0697   | kdpB   | 11 | -0.067 | -0.204 | -0.134 | 0.042  | -0.017 | -0.212 | -0.154 | -0.097 | -0.093 | 0.056  | 0.024  | -0.186 | -0.052 | -0.072 | -0.070 | 0.066  | -0.032 | -0.194 | -0.038 | 0.004  | -0.263 | -0.115 |   | 1 |
| JW0686 | b0698   | kdpA   | 11 | -0.029 | -0.076 | -0.139 | -0.150 | -0.191 | 0.029  | 0.021  | -0.291 | -0.265 | 0.103  | -0.007 | -0.253 | -0.027 | -0.192 | -0.185 | -0.447 | -0.193 | -0.198 | 0.102  | -0.126 | -0.189 | -0.077 |   | 1 |
| JW0687 | kdpF    |        | 11 | 0.182  | 0.683  | 0.381  | 0.521  | -0.199 | -0.157 | 0.040  | 0.225  | 0.529  | 0.645  | 0.376  | 0.643  | 0.376  | 0.136  | 0.156  | 0.932  | -0.183 | 0.398  | 0.740  | -0.393 | -1.434 | 0.686  |   | 1 |
| JW0688 | b0699   | ybfA   | 15 | 0.161  | 0.083  | 0.095  | -0.206 | -0.176 | -0.107 | 0.145  | -0.244 | -0.184 | -0.085 | -0.103 | -0.181 | -0.082 | -0.175 | -0.132 | -0.272 | -0.119 | -0.290 | 0.123  | -0.388 | -0.557 | -0.040 |   | 1 |
| JW0690 | 174f4.1 |        | 15 | -1.117 | 0.168  | 0.030  | -1.008 | -8.487 | 0.054  | -0.220 | -8.454 | -7.885 | -0.781 | 0.101  | 0.135  | -1.880 | -2.351 | -1.877 | -7.788 | -6.800 | -7.750 | 0.041  | -8.051 | -0.207 | -1.065 |   | 1 |
| JW0691 | b0702   | ybfB   | 15 | -1.903 | 0.078  | -0.166 | -0.936 | -1.954 | -0.236 | -0.087 | -2.153 | -1.839 | -1.738 | 0.065  | 0.175  | -2.075 | -1.915 | -1.692 | -2.141 | -1.866 | -2.164 | 0.060  | -1.991 | -1.748 | -2.019 |   | 1 |
| JW0692 | b0703   | (rfsA) | 15 | -0.047 | 0.305  | 0.146  | -0.840 | -5.902 | 0.128  | 0.039  | -6.038 | -5.917 | -0.220 | -0.012 | -0.107 | -0.879 | -1.047 | -0.940 | -5.667 | -5.366 | -5.543 | 0.132  | -7.656 | 0.074  | -1.039 |   | 1 |
| JW0693 | b0704   | ybfC   | 15 | 0.143  | 0.177  | -0.013 | -1.012 | -4.558 | -0.085 | 0.185  | -4.429 | -4.908 | 0.190  | 0.076  | -2.945 | -0.335 | -0.263 | -0.299 | -4.312 | -3.859 | -4.224 | 0.061  | -5.396 | -0.172 | -3.375 |   | 1 |
| JW0695 | b0705   | ybfL   | 15 | 0.163  | 0.316  | -0.044 | -1.117 | -2.353 | 0.673  | 0.234  | -6.843 | -6.463 | 0.704  | 0.365  | 0.702  | 0.349  | -0.085 | 0.601  | -1.188 | -0.513 | -1.367 | 0.031  | -6.794 | 0.590  | 0.330  |   | 1 |
| JW0696 | b0706   | ybfD   | 15 | 0.005  | 0.036  | -0.310 | -1.284 | -2.620 | 0.600  | -0.074 | -6.855 | -6.362 | 0.562  | 0.387  | 0.444  | 0.244  | -0.124 | 0.491  | -1.405 | -0.743 | -1.543 | -0.145 | -6.542 | 0.303  | -0.117 |   | 1 |
| JW0697 | b0707   | ybfA   | 15 | 0.005  | -0.030 | -0.239 | -0.348 | -0.264 | 0.034  | 0.023  | -0.542 | -0.396 | 0.042  | 0.034  | 0.013  | 0.129  | 0.094  | 0.159  | -0.526 | -0.362 | -0.644 | -0.063 | -0.110 | -0.025 | 0.242  |   | 1 |
| JW0698 | b0708   | phrB   | 10 | -0.238 | -0.305 | -0.440 | -0.456 | -0.395 | 0.138  | -0.228 | -0.643 | -0.576 | -0.073 | 0.019  | -0.152 | -0.188 | -0.221 | -0.187 | -0.787 | -0.629 | -0.637 | -0.351 | -0.238 | -0.369 | -0.031 |   | 1 |
| JW0699 | b0709   | ybfH   | 15 | -0.498 | -0.049 | -0.180 | -0.021 | -0.113 | -0.099 | -0.190 | -0.060 | -0.059 | 0.131  | 0.133  | 0.122  | -0.045 | -0.332 | -0.078 | -0.073 | 0.017  | -0.079 | -0.071 | 0.056  | -0.122 | -0.191 |   | 1 |
| JW0700 | b0710   | ybgJ   | 15 | 0.087  | 0.050  | 0.069  | 0.162  | 0.264  | -0.037 | 0.001  | 0.183  | 0.206  | 0.089  | 0.055  | 0.055  | 0.072  | 0.032  | 0.105  | 0.163  | 0.214  | 0.142  | 0.112  | 0.147  | 0.073  | 0.082  |   | 1 |
| JW0701 | b0711   | ybgJ   | 15 | 0.191  | -0.037 | -0.033 | 0.122  | 0.150  | 0.024  | -0.071 | 0.005  | -0.049 | 0.063  | 0.042  | 0.036  | 0.148  | -0.048 | -0.014 | -0.064 | -0.013 | -0.155 | -0.003 | 0.047  | -0.433 | -0.052 |   | 1 |
| JW0702 | b0712   | ybgK   | 15 | 0.198  | 0.015  | -0.010 | 0.107  | 0.076  | 0.076  | 0.117  | 0.008  | 0.005  | 0.010  | -0.028 | -0.127 | -0.019 | -0.067 | -0.023 | 0.037  | -0.016 | -0.279 | 0.061  | 0.012  | -0.062 | 0.084  |   | 1 |
| JW0703 | b0713   | ybgL   | 15 | -0.148 | -0.153 | -0.018 | -0.067 | -0.031 | -0.079 | -0.125 | -0.083 | -0.162 | -0.182 | -0.277 | -0.072 | 0.015  | -0.433 | -0.013 | -0.340 | -0.080 | -0.058 | 0.146  | -0.117 | 0.025  | 0.052  |   | 1 |
| JW0704 | b0714   | endB   | 8  | 0.012  | -0.095 | -0.250 | -0.117 | -0.020 | 0.017  | -0.184 | -0.108 | -0.169 | -0.144 | -0.193 | -0.078 | -0.141 | -0.253 | -0.151 | -0.340 | -0.281 | -0.258 | -0.021 | -0.091 | 0.105  | -0.032 |   | 1 |
| JW0705 | b0715   | abrB   | 15 | -0.659 | -0.281 | -0.361 | -0.401 | -0.305 | -0.025 | -0.331 | -0.461 | -0.326 | -0.108 | 0.015  | -0.182 | -0.307 | -0.469 | -0.190 | -0.704 | -0.447 | -0.451 | -0.325 | -0.186 | 0.225  | -0.116 |   | 1 |
| JW0706 | b0716   | ybgO   | 15 | -1.699 | -0.428 | -0.585 | -0.885 | -1.467 | 0.011  | -0.420 | -1.531 | -1.479 | 0.063  | -0.020 | -0.350 | -0.357 | -0.439 | -0.379 | -1.678 | -1.477 | -1.547 | -0.341 | -0.331 | -0.195 | -0.246 |   | 1 |
| JW0707 | b0717   | ybgP   | 3  | -2.109 | -0.519 | -0.690 | -1.130 | -2.260 | 0.073  | -0.453 | -2.032 | -2.379 | -0.004 | -0.042 | -0.537 | -0.427 | -0.467 | -0.564 | -2.482 | -2.032 | -2.039 | -0.567 | -0.432 | -0.422 | -0.296 |   | 1 |
| JW0708 | b0718   | ybgQ   | 3  | -2.592 | -0.195 | -0.550 | -1.168 | -3.361 | 0.191  | -0.330 | -3.380 | -3.956 | -0.070 | -0.150 | -0.308 | -0.602 | -0.639 | -0.619 | -3.118 | -4.469 | -4.489 | -0.334 | -0.546 | -0.459 | -0.381 |   | 1 |
| JW0709 | b0719   | ybgD   | 3  | -3.652 | -2.712 | -2.944 | -3.492 | -4.813 | 0.013  | -2.565 | -4.535 | -4.369 | -2.867 | -2.727 | -2.698 | -2.622 | -2.510 | -2.568 | -4.783 | -4.331 | -4.528 | -2.589 | -2.630 | -2.354 | -2.377 |   | 1 |
| JW0710 | b0720   | gltA   | 6  | 0.205  | 0.179  | 0.060  | 0.173  | 0.324  | 0.084  | 0.170  | 0.191  | 0.182  | -0.046 | -0.055 | 0.048  | 0.105  | 0.095  | 0.128  | 0.199  | 0.271  | 0.032  | 0.190  | 0.298  | 0.272  | 0.315  |   | 1 |
| JW0711 | b0721   | sdhC   | 6  | 0.184  | 0.042  | -0.079 | 0.032  | 0.448  | 0.008  | 0.056  | 0.251  | 0.322  | -0.027 | 0.023  | -0.046 | 0.141  | 0.166  | 0.118  | 0.305  | 0.301  | 0.336  | -0.024 | 0.159  | 0.219  | 0.254  |   | 1 |
| JW0712 | b0722   | sdhD   | 6  | 0.124  | -0.057 | -0.072 | 0.055  | 0.324  | 0.035  | 0.205  | 0.306  | 0.125  | -0.074 | -0.040 | -0.124 | 0.002  | -0.095 | -0.052 | 0.022  | 0.263  | 0.193  | 0.076  | 0.053  | 0.021  | 0.099  |   | 1 |
| JW0713 | b0723   | sdhA   | 6  | -0.272 | 0.040  | -0.178 | 0.021  | -0.005 | -0.039 | -0.113 | 0.113  | 0.040  | -0.177 | -0.120 | -0.082 | 0.066  | -0.195 | 0.071  | -0.056 | 0.071  | 0.011  | 0.016  | 0.236  | 0.183  | 0.102  |   | 1 |
| JW0714 | b0724   | sdhB   | 6  | 0.150  | 0.023  | 0.017  | 0.215  | 0.318  | -0.179 | 0.080  | 0.294  | 0.277  | 0.041  | 0.035  | 0.136  | 0.058  | 0.066  | 0.126  | 0.200  | 0.269  | 0.296  | 0.076  | 0.250  | 0.222  | 0.170  |   | 1 |
| JW0715 | b0726   | sucA   | 6  | 0.204  | 0.161  | 0.087  | 0.268  | 0.341  | 0.053  | 0.091  | 0.229  | 0.190  | 0.026  | 0.022  | 0.092  | 0.197  | 0.156  | 0.141  | 0.100  | 0.127  | 0.144  | 0.105  | 0.114  | 0.176  | 0.183  |   | 1 |
| JW0716 | b0727   | sucB   | 6  | 0.425  | 0.153  | 0.252  | 0.284  | 0.349  | 0.090  | 0.190  | 0.248  | 0.171  | 0.040  | 0.047  | -0.016 | 0.151  | 0.089  | 0.097  | 0.186  | 0.214  | 0.107  | 0.335  | 0.258  | 0.239  | 0.161  |   | 1 |
| JW0717 | b0728   | sucC   | 6  | 0.279  | 0.143  | 0.184  | 0.187  | 0.344  | 0.058  | 0.166  | 0.307  | 0.228  | 0.037  | 0.023  | -0.053 | 0.160  | 0.069  | 0.103  | 0.276  | 0.261  | 0.224  | 0.253  | 0.181  | 0.190  | 0.126  |   | 1 |
| JW0718 | b0729   | sucD   | 6  | 0.143  | -0.161 | -0.183 | -0.187 | -0.144 | 0.011  | -0.020 | -0.098 | -0.142 | 0.150  | 0.029  | -0.194 | -0.172 | -0.322 | -0.371 | -0.143 | -0.116 | -0.067 | -0.191 | -0.102 | 0.083  | -0.123 |   | 1 |
| JW0719 | b0730   | farR   | 13 | -4.863 | 0.029  | 0.017  | -0.070 | -0.282 | -0.140 | -0.288 | -5.185 | -0.052 | 0.081  | 0.221  | 0.047  | 0.034  | -0.124 | -0.036 | -5.074 | -5.173 | -5.316 | -0.011 | 0.039  | 0.196  | -0.058 |   | 1 |
| JW0720 | b0731   | hrsA   | 14 | -3.351 |        |        |        |        |        |        |        |        |        |        |        |        |        |        |        |        |        |        |        |        |        |   |   |





|        |       |            |    |        |        |        |        |        |        |        |        |        |        |        |        |        |        |        |        |        |        |        |        |        |        |   |
|--------|-------|------------|----|--------|--------|--------|--------|--------|--------|--------|--------|--------|--------|--------|--------|--------|--------|--------|--------|--------|--------|--------|--------|--------|--------|---|
| JW0855 | b0871 | poxB       | 6  | -0.056 | 0.116  | 0.209  | 0.007  | -0.066 | -0.011 | 0.192  | -0.097 | -0.066 | -0.184 | -0.236 | -0.101 | -0.167 | -0.285 | -0.248 | -0.019 | -0.058 | -0.221 | 0.277  | -0.213 | -0.287 | 0.119  |   |
| JW0856 | b0872 | ybjV / hcr | 14 | 0.015  | 0.134  | 0.307  | -0.012 | 0.094  | -0.090 | 0.190  | 0.021  | 0.062  | 0.038  | 0.020  | -0.171 | 0.115  | 0.025  | 0.106  | -0.056 | 0.011  | -0.022 | 0.208  | 0.232  | 0.122  | 0.155  | 1 |
| JW0857 | b0873 | ybjW / hcp | 14 | -0.473 | 0.053  | 0.005  | -0.050 | -0.248 | -0.192 | -0.034 | -0.075 | 0.036  | 0.195  | 0.193  | -0.162 | -0.070 | -0.227 | 0.044  | -0.011 | 0.043  | -0.063 | 0.010  | 0.258  | 0.118  | 0.233  | 1 |
| JW0858 | b0874 | ybjE       | 15 | 0.073  | 0.136  | 0.148  | -0.152 | -0.080 | -0.121 | 0.228  | -0.089 | 0.073  | 0.117  | 0.057  | -0.117 | 0.110  | 0.127  | 0.181  | -0.011 | 0.069  | -0.198 | 0.043  | 0.299  | -0.071 | 0.241  | 1 |
| JW0859 | b0875 | aqpZ       | 3  | -0.187 | 0.114  | 0.204  | -0.044 | -0.159 | -0.183 | 0.077  | -0.071 | 0.124  | 0.166  | 0.221  | 0.166  | 0.090  | -0.100 | 0.231  | -0.046 | -0.045 | -0.155 | 0.131  | 0.019  | -0.322 | -1.169 | 1 |
| JW0860 | b0876 | ybjD       | 15 | -0.129 | -0.069 | -0.102 | -0.048 | 0.004  | -0.114 | -0.235 | -0.026 | 0.085  | 0.093  | 0.156  | -0.266 | -0.210 | -0.212 | 0.045  | 0.171  | 0.033  | -0.126 | -0.005 | -0.194 | 0.151  |        | 1 |
| JW0861 | b0877 | ybjX       | 15 | 0.264  | 0.098  | 0.177  | 0.147  | 0.224  | -0.042 | 0.050  | 0.121  | 0.185  | 0.078  | 0.120  | 0.080  | 0.155  | 0.124  | 0.143  | 0.214  | 0.234  | 0.130  | 0.152  | -0.165 | 0.149  | 0.163  | 1 |
| JW0862 | b0878 | 213#3      | 15 | 0.353  | 0.143  | 0.138  | 0.057  | 0.070  | 0.016  | 0.051  | -0.019 | 0.007  | -0.081 | -0.094 | -0.066 | 0.160  | 0.203  | 0.176  | 0.006  | 0.039  | -0.070 | 0.111  | -0.039 | 0.125  | 0.040  | 1 |
| JW0864 | b0880 | cspD       | 14 | 0.305  | 0.183  | 0.151  | 0.185  | 0.276  | 0.027  | 0.178  | 0.143  | 0.223  | 0.054  | -0.011 | -0.013 | 0.439  | 0.180  | 0.174  | 0.326  | 0.260  | 0.179  | 0.059  | 0.196  | 0.106  | 0.222  | 1 |
| JW0865 | b0881 | yjaJ       | 15 | 0.373  | 0.226  | 0.232  | 0.057  | 0.269  | -0.118 | 0.151  | 0.144  | 0.221  | -0.098 | 0.014  | -0.127 | 0.096  | 0.100  | 0.099  | 0.215  | 0.184  | 0.289  | 0.112  | 0.297  | 0.215  | 0.231  | 1 |
| JW0866 | b0882 | clpA       | 14 | 0.314  | 0.007  | 0.117  | 0.097  | 0.160  | 0.045  | 0.007  | 0.088  | 0.107  | 0.007  | 0.031  | 0.141  | 0.147  | 0.169  | 0.149  | 0.131  | 0.094  | 0.127  | 0.063  | 0.238  | 0.087  | 0.076  | 1 |
| JW0867 | b0884 | infA       | 12 | -0.126 | 0.114  | 0.072  | 0.058  | 0.155  | -0.229 | 0.119  | 0.186  | 0.386  | 0.107  | 0.018  | 0.140  | 0.140  | -0.078 | 0.269  | 0.303  | 0.327  | 0.424  | 0.071  | 0.211  | 0.243  | 0.343  | 1 |
| JW0868 | b0885 | aat        | 12 | 0.161  | 0.175  | 0.188  | 0.006  | 0.096  | -0.091 | 0.108  | 0.000  | 0.156  | 0.043  | -0.002 | 0.081  | 0.097  | 0.111  | 0.207  | -0.003 | 0.058  | -0.450 | 0.248  | 0.158  | 0.089  | 0.090  | 1 |
| JW0869 | b0886 | cydC       | 11 | 0.261  | -0.038 | 0.044  | 0.017  | 0.039  | -0.010 | -0.037 | 0.060  | 0.011  | 0.041  | -0.019 | 0.059  | 0.033  | -0.009 | 0.029  | 0.034  | 0.121  | -0.316 | 0.098  | 0.282  | 0.029  | 0.144  | 1 |
| JW0870 | b0887 | cydD       | 11 | 0.223  | 0.092  | -0.022 | 0.058  | 0.143  | 0.056  | 0.064  | 0.087  | -0.031 | 0.058  | -0.035 | -0.002 | 0.132  | -0.049 | 0.035  | 0.032  | 0.117  | 0.023  | 0.080  | 0.093  | 0.090  | 0.121  | 1 |
| JW0871 | b0888 | trxB       | 8  | 0.269  | 0.121  | 0.188  | 0.006  | 0.215  | 0.012  | 0.121  | 0.059  | 0.096  | -0.103 | -0.076 | -0.054 | 0.053  | -0.029 | 0.017  | 0.063  | 0.126  | 0.027  | 0.245  | 0.220  | 0.221  | 0.212  | 1 |
| JW0872 | b0889 | lrp        | 5  | 0.314  | 0.135  | 0.111  | 0.035  | 0.350  | -0.045 | 0.181  | 0.239  | 0.279  | 0.008  | 0.019  | -0.082 | 0.104  | 0.084  | 0.093  | 0.269  | 0.302  | 0.332  | -0.010 | 0.243  | 0.149  | 0.202  | 1 |
| JW0873 | b0890 | ftsK       | 4  | -0.215 | 0.057  | 0.089  | 0.148  | 0.138  | -0.094 | -0.072 | 0.178  | 0.206  | -0.024 | 0.039  | 0.032  | 0.045  | -0.222 | 0.097  | 0.081  | 0.192  | -0.001 | 0.073  | 0.286  | 0.119  | 0.138  | 1 |
| JW0874 | b0891 | lolA       | 11 | 0.221  | 0.148  | 0.285  | 0.283  | 0.352  | 0.001  | 0.105  | 0.234  | 0.280  | 0.104  | 0.095  | 0.188  | 0.051  | 0.071  | 0.112  | 0.232  | 0.259  | 0.135  | 0.185  | 0.262  | 0.095  | 0.172  | 1 |
| JW0875 | b0892 | ycaJ       | 15 | 0.374  | 0.004  | 0.109  | 0.235  | 0.393  | 0.066  | -0.039 | 0.299  | 0.194  | 0.009  | 0.035  | -0.071 | 0.025  | 0.008  | 0.009  | 0.192  | 0.242  | 0.114  | 0.067  | 0.237  | -0.045 | 0.035  | 1 |
| JW0876 | b0893 | serS       | 12 | 0.351  | 0.118  | 0.149  | 0.147  | 0.220  | 0.110  | 0.122  | 0.151  | 0.101  | 0.001  | 0.033  | 0.056  | 0.107  | 0.141  | 0.106  | 0.203  | 0.205  | 0.063  | 0.123  | 0.304  | 0.114  | 0.183  | 1 |
| JW0877 | b0894 | dmsA       | 6  | 0.225  | 0.056  | 0.104  | 0.122  | 0.053  | 0.124  | 0.083  | 0.070  | -0.017 | 0.126  | 0.116  | 0.134  | 0.152  | 0.154  | 0.135  | 0.072  | 0.017  | -0.057 | 0.024  | 0.133  | -0.042 | 0.102  | 1 |
| JW0878 | b0895 | dmsB       | 6  | 0.261  | 0.183  | 0.053  | 0.061  | 0.017  | 0.140  | 0.121  | 0.020  | -0.055 | 0.115  | 0.075  | 0.017  | 0.295  | 0.199  | 0.216  | 0.126  | -0.021 | -0.111 | 0.008  | 0.075  | 0.133  | 0.087  | 1 |
| JW0879 | b0896 | dmsC       | 6  | 0.069  | 0.031  | -0.064 | 0.047  | 0.139  | 0.106  | -0.030 | 0.102  | 0.059  | 0.141  | 0.084  | 0.009  | 0.143  | 0.177  | 0.171  | 0.070  | 0.052  | -0.051 | -0.023 | -0.179 | 0.036  | -0.010 | 1 |
| JW0880 | b0897 | ycaC       | 15 | 0.170  | 0.037  | 0.041  | -0.063 | -0.195 | 0.126  | 0.155  | 0.085  | -0.203 | 0.139  | 0.142  | 0.045  | 0.089  | 0.090  | 0.133  | 0.142  | -0.005 | 0.029  | -0.032 | -0.009 | 0.033  | 0.007  | 1 |
| JW0881 | b0898 | ycaD       | 15 | -0.212 | 0.148  | 0.088  | 0.161  | 0.007  | -0.039 | 0.088  | -0.058 | 0.217  | 0.123  | 0.084  | 0.291  | 0.141  | -0.039 | 0.317  | -0.131 | -0.093 | -0.028 | 0.140  | -0.005 | -0.048 | 0.172  | 1 |
| JW0882 | b0899 | (yjeM)     | 15 |        |        |        |        |        |        |        |        |        |        |        |        |        |        |        |        |        |        |        |        |        |        |   |
| JW0883 | b0900 | ycaN       | 15 | -2.740 | 0.181  | 0.215  | -0.804 | -4.943 | 0.103  | 0.174  | -4.652 | -4.653 | 0.083  | 0.101  | 0.194  | 0.195  | 0.270  | 0.189  | -4.970 | -4.440 | -4.712 | 0.284  | 0.416  | 0.282  | 0.302  | 1 |
| JW0884 | b0901 | ycaK       | 15 | -4.634 | 0.095  | -0.122 | -0.911 | -5.095 | 0.172  | 0.116  | -5.035 | -4.795 | 0.059  | 0.089  | 0.079  | -0.011 | 0.093  | 0.081  | -5.300 | -5.048 | -5.319 | -0.052 | -0.133 | 0.228  | -1.514 | 1 |
| JW0885 | b0902 | pfiA       | 6  | 0.141  | 0.201  | -0.275 | 0.082  | 0.457  | 0.131  | 0.224  | 0.258  | 0.185  | 0.029  | 0.021  | -0.066 | 0.178  | 0.225  | 0.189  | 0.253  | 0.289  | 0.150  | 0.156  | 0.082  | 0.251  | 0.340  | 1 |
| JW0886 | b0903 | pfiB       | 6  | 0.022  | 0.270  | 0.258  | 0.300  | 0.533  | 0.208  | 0.279  | 0.517  | 0.263  | 0.131  | 0.086  | -0.024 | 0.131  | 0.181  | 0.093  | 0.288  | 0.280  | 0.280  | 0.197  | 0.159  | 0.119  | 0.343  | 1 |
| JW0887 | b0904 | focA       | 11 | -0.394 | 0.016  | 0.131  | 0.352  | 0.370  | 0.083  | 0.140  | 0.376  | 0.299  | 0.144  | 0.149  | 0.219  | 0.037  | -0.131 | 0.172  | 0.254  | 0.187  | 0.308  | 0.124  | 0.181  | 0.184  | 0.374  | 1 |
| JW0888 | b0905 | ycaO       | 15 | 0.183  | 0.160  | 0.052  | 0.202  | 0.200  | 0.233  | 0.139  | 0.151  | -0.137 | 0.126  | 0.105  | 0.103  | 0.108  | -0.004 | 0.080  | 0.027  | 0.018  | 0.031  | 0.161  | 0.059  | 0.033  | 0.200  | 1 |
| JW0889 | b0906 | ycaP       | 15 | 0.404  | 0.014  | 0.029  | 0.302  | 0.394  | 0.255  | 0.107  | 0.322  | 0.194  | 0.078  | 0.117  | 0.017  | 0.052  | 0.074  | 0.103  | 0.175  | 0.086  | 0.057  | -0.002 | -0.110 | 0.042  | 0.125  | 1 |
| JW0890 | b0907 | serC       | 1  | 0.189  | 0.168  | 0.229  | 0.097  | -0.171 | 0.186  | 0.203  | -0.081 | -0.270 | 0.107  | 0.109  | -0.108 | 0.151  | 0.111  | 0.180  | -0.278 | -0.296 | -0.278 | 0.185  | 0.213  | 0.160  | 0.222  | 1 |
| JW0891 | b0908 | aroA       | 1  | 0.083  | 0.156  | 0.138  | 0.217  | 0.314  | 0.035  | 0.064  | -0.022 | 0.109  | -0.011 | 0.085  | 0.224  | 0.018  | -0.137 | 0.228  | -0.243 | -0.195 | -0.184 | 0.270  | 0.091  | 0.070  | 0.245  | 1 |
| JW0892 | b0909 | ycaL       | 15 | 0.075  | 0.155  | 0.000  | 0.029  | 0.040  | 0.002  | 0.122  | -0.027 | -0.041 | 0.043  | -0.006 | 0.219  | 0.167  | 0.211  | 0.227  | -0.190 | -0.139 | -0.203 | 0.268  | 0.278  | 0.335  | 0.384  | 1 |
| JW0893 | b0910 | cmk        | 8  | 0.156  | 0.070  | 0.001  | -0.024 | 0.229  | 0.057  | -0.082 | 0.073  | -0.055 | 0.007  | 0.055  | 0.143  | -0.012 | -0.023 | -0.002 | -0.224 | -0.116 | -0.146 | 0.100  | 0.319  | 0.168  | 0.083  | 1 |
| JW0894 | b0911 | rpsA       | 12 | 0.376  | 0.220  | 0.061  | 0.341  | 0.618  | 0.213  | 0.187  | 0.366  | 0.233  | 0.083  | 0.068  | 0.128  | 0.215  | 0.140  | 0.137  | 0.212  | 0.246  | 0.206  | 0.354  | 0.326  | 0.188  | 0.227  | 1 |
| JW0895 | b0912 | himD       | 10 | 0.436  | 0.145  | 0.185  | 0.178  | 0.652  | 0.183  | 0.221  | 0.369  | 0.306  | -0.026 | 0.078  | -0.001 | 0.161  | 0.101  | 0.130  | 0.243  | 0.281  | 0.175  | 0.191  | 0.235  | 0.243  | 0.230  | 1 |
| JW0896 | b0913 | ycaI       | 15 | -0.100 | -0.113 | -0.053 | 0.074  | 0.046  | 0.183  | -0.100 | 0.055  | -0.093 | 0.095  | 0.140  | 0.182  | -0.056 | -0.004 | 0.034  | -0.151 | -0.131 | -0.255 | -0.158 | 0.173  | 0.125  | 0.080  | 1 |
| JW0897 | b0914 | msbA       | 11 | 0.261  | 0.073  | 0.187  | 0.255  | 0.315  | 0.124  | 0.083  | 0.221  | 0.099  | 0.110  | 0.123  | 0.155  | 0.154  | 0.094  | 0.116  | 0.129  | 0.133  | 0.085  | 0.093  | 0.214  | 0.189  | 0.175  | 1 |
| JW0898 | b0915 | lpxK       | 7  | 0.248  | 0.168  | 0.183  | 0.110  | 0.312  | 0.092  | 0.216  | 0.228  | 0.085  | -0.011 | 0.026  | -0.133 | 0.140  | -0.018 | 0.117  | 0.035  | 0.079  | 0.012  | 0.274  | 0.323  | 0.073  | 0.257  | 1 |
| JW0899 | b0916 | ycaQ       | 15 | 0.160  | 0.076  | 0.110  | 0.121  | 0.198  | 0.056  | -0.007 | 0.149  | 0.084  | 0.062  | 0.125  | 0.132  | 0.070  | 0.051  | 0.113  | 0.056  | 0.075  | 0.034  | 0.081  | 0.232  | 0.140  | 0.149  | 1 |
| JW0901 | b0918 | kdsB       | 3  | 0.163  | 0.136  | -0.030 | -0.008 | 0.025  | 0.050  | -0.117 | -0.051 | -0.049 | 0.177  | 0.136  | 0.212  | 0.218  | 0.199  | 0.180  | 0.173  | -0.003 | 0.018  | -0.100 | 0.237  | 0.224  | 0.219  | 1 |
| JW0902 | b0919 | 218#5      | 15 | 0.276  | 0.110  | 0.082  | 0.100  | 0.208  | 0.104  | 0.089  | 0.134  | 0.142  | 0.171  | 0.096  | 0.093  | 0.166  | 0.100  | 0.146  | 0.269  | 0.285  | 0.244  | 0.016  | 0.235  | 0.165  | 0.191  | 1 |
| JW0903 | b0920 | ycaC       | 15 | 0.286  | 0.073  | 0.098  | 0.104  | 0.202  | 0.065  | 0.105  | 0.134  | 0.135  | 0.059  | 0.017  | -0.081 | 0.063  | 0.053  | 0.101  | 0.221  | 0.167  | 0.007  | 0.061  | 0.203  | 0.119  | 0.062  | 1 |
| JW0904 | b0921 | smtA       | 2  | 0.270  | 0.120  | 0.144  | 0.149  | 0.3    |        |        |        |        |        |        |        |        |        |        |        |        |        |        |        |        |        |   |

|        |       |        |    |        |        |        |        |        |        |        |        |        |        |        |        |        |        |        |        |        |        |        |        |        |        |  |   |
|--------|-------|--------|----|--------|--------|--------|--------|--------|--------|--------|--------|--------|--------|--------|--------|--------|--------|--------|--------|--------|--------|--------|--------|--------|--------|--|---|
| JW0946 | b0963 | mgsA   | 5  | 0.412  | 0.042  | 0.114  | 0.194  | 0.488  | -0.035 | 0.172  | -0.016 | 0.353  | 0.011  | 0.035  | 0.100  | 0.141  | 0.160  | 0.125  | 0.370  | 0.330  | 0.339  | 0.220  | 0.286  | 0.221  | 0.167  |  |   |
| JW0947 | b0964 | 223#9  | 15 | 0.424  | 0.188  | 0.097  | 0.088  | 0.256  | 0.055  | 0.280  | -0.180 | 0.168  | 0.060  | 0.094  | 0.066  | 0.150  | 0.208  | 0.186  | 0.195  | 0.184  | 0.184  | 0.189  | 0.277  | 0.279  | 0.191  |  | 1 |
| JW0948 | b0965 | 223#10 | 15 | 0.045  | 0.002  | -0.248 | -0.203 | -0.105 | -0.157 | -0.091 | -0.172 | -0.123 | -0.122 | -0.088 | -0.403 | -0.096 | -0.058 | -0.056 | -0.215 | -0.206 | 0.009  | -0.202 | 0.136  | 0.009  | -0.039 |  | 1 |
| JW0949 | b0966 | ycyV   | 15 | 0.099  | 0.159  | 0.306  | 0.316  | 0.182  | -0.148 | 0.155  | 0.276  | 0.242  | 0.058  | 0.082  | 0.102  | 0.182  | 0.202  | 0.187  | 0.226  | 0.331  | 0.134  | 0.242  | 0.283  | 0.285  | 0.259  |  | 1 |
| JW0950 | b0967 | ycyW   | 15 | 0.113  | 0.081  | -0.025 | 0.140  | 0.173  | -0.034 | -0.043 | 0.030  | 0.127  | 0.092  | 0.154  | 0.176  | 0.122  | 0.049  | 0.010  | 0.106  | 0.032  | -0.032 | 0.036  | 0.158  | 0.020  | 0.061  |  | 1 |
| JW0951 | b0968 | acyP   | 7  | 0.202  | 0.024  | -0.108 | -0.061 | -0.018 | -0.023 | 0.191  | -0.004 | -0.004 | 0.070  | 0.049  | -0.091 | -0.068 | 0.161  | 0.019  | 0.030  | -0.092 | 0.028  | -0.105 | -0.119 | 0.081  | 0.104  |  | 1 |
| JW0953 | b0970 | ycyA   | 11 | 0.206  | 0.113  | -0.114 | -0.162 | 0.008  | -0.155 | 0.144  | -0.032 | 0.168  | 0.198  | 0.079  | -0.089 | 0.178  | 0.122  | 0.211  | 0.098  | 0.137  | 0.127  | -0.154 | 0.180  | 0.183  | 0.215  |  | 1 |
| JW0954 | b0972 | hyaA   | 6  | 0.017  | 0.192  | 0.047  | 0.166  | 0.104  | -0.098 | 0.041  | -0.035 | 0.196  | 0.133  | 0.121  | 0.152  | 0.083  | 0.067  | 0.181  | 0.009  | 0.083  | -0.114 | 0.149  | 0.164  | 0.108  | 0.242  |  | 1 |
| JW0955 | b0973 | hyaB   | 6  | 0.035  | 0.197  | -0.031 | 0.019  | 0.045  | 0.026  | -0.097 | -0.055 | -0.004 | 0.141  | 0.063  | 0.131  | 0.220  | 0.205  | 0.091  | -0.092 | -0.083 | -0.116 | -0.029 | 0.076  | -0.070 | -0.048 |  | 1 |
| JW0956 | b0974 | hyaC   | 6  | 0.420  | 0.266  | -0.122 | -0.006 | 0.187  | 0.083  | 0.008  | 0.042  | 0.007  | 0.074  | 0.053  | 0.064  | 0.227  | 0.246  | 0.140  | -0.015 | 0.033  | -0.190 | 0.038  | 0.139  | 0.018  | 0.023  |  | 1 |
| JW0957 | b0975 | hyaD   | 6  | 0.208  | 0.232  | -0.049 | -0.289 | -0.675 | -0.073 | 0.051  | -0.732 | -0.526 | 0.085  | 0.014  | -0.168 | 0.144  | 0.133  | 0.117  | -0.728 | -0.481 | -0.675 | -0.014 | 0.029  | 0.027  | -0.029 |  | 1 |
| JW0958 | b0976 | hyaE   | 6  | 0.284  | 0.232  | 0.102  | -0.072 | -0.188 | -0.139 | 0.129  | -0.231 | -0.041 | 0.242  | 0.050  | -0.286 | 0.239  | 0.159  | 0.226  | -0.002 | -0.157 | -0.245 | 0.113  | 0.401  | 0.314  | 0.169  |  | 1 |
| JW0959 | b0977 | hyaF   | 6  | 0.141  | 0.238  | 0.028  | -0.010 | 0.157  | -0.161 | 0.068  | 0.024  | 0.163  | -0.021 | 0.000  | 0.055  | 0.051  | -0.049 | 0.132  | 0.053  | 0.021  | -0.048 | 0.216  | 0.081  | 0.115  | 0.104  |  | 1 |
| JW0960 | b0978 | appC   | 6  | 0.188  | 0.142  | -0.089 | 0.096  | 0.163  | -0.043 | 0.027  | 0.086  | 0.083  | 0.150  | 0.033  | 0.075  | 0.170  | 0.079  | 0.079  | -0.125 | -0.062 | -0.058 | 0.119  | 0.149  | 0.107  | 0.035  |  | 1 |
| JW0961 | b0979 | appB   | 6  | 0.362  | 0.104  | -0.208 | -0.024 | 0.201  | 0.043  | -0.033 | 0.109  | 0.093  | -0.001 | 0.027  | 0.042  | -0.007 | -0.030 | -0.038 | 0.077  | 0.024  | 0.014  | -0.077 | 0.213  | 0.044  | 0.034  |  | 1 |
| JW0963 | b0980 | appA   | 5  | 0.283  | 0.297  | -0.126 | -0.075 | 0.155  | 0.055  | -0.019 | -0.011 | 0.006  | 0.029  | 0.026  | -0.001 | 0.118  | 0.156  | 0.134  | -0.058 | -0.054 | -0.142 | 0.061  | 0.052  | -0.042 | 0.146  |  | 1 |
| JW0964 | b0981 | ycyC   | 15 | 0.259  | 0.277  | 0.024  | -0.031 | 0.095  | 0.004  | 0.224  | -0.140 | 0.117  | 0.130  | 0.049  | -0.043 | 0.158  | 0.158  | 0.126  | -6.714 | -5.945 | -6.437 | 0.145  | 0.251  | 0.150  | 0.231  |  | 1 |
| JW0965 | b0982 | ycyY   | 15 | 0.497  | 0.301  | 0.147  | 0.064  | 0.343  | -0.089 | 0.337  | 0.149  | 0.309  | 0.051  | 0.130  | -0.235 | 0.158  | 0.048  | 0.097  | -6.974 | -6.344 | -7.077 | 0.173  | 0.286  | 0.405  | 0.177  |  | 1 |
| JW0966 | b0983 | ycyZ   | 15 | 0.285  | 0.264  | 0.050  | 0.085  | 0.277  | 0.016  | 0.163  | 0.060  | 0.176  | 0.156  | 0.084  | 0.012  | 0.216  | 0.278  | 0.216  | -5.799 | -5.814 | -6.510 | 0.145  | 0.357  | 0.114  | 0.194  |  | 1 |
| JW0967 | b0984 | ymcA   | 15 | 0.042  | -0.027 | -0.024 | -0.008 | 0.032  | -0.112 | 0.009  | -0.323 | 0.152  | 0.135  | 0.098  | 0.107  | -0.101 | -0.076 | -0.031 | -6.793 | -6.367 | -6.934 | 0.047  | -0.044 | -0.049 | 0.005  |  | 1 |
| JW0968 | b0985 | ymcB   | 15 | 0.280  | 0.309  | 0.068  | 0.139  | 0.178  | 0.045  | 0.225  | 0.139  | 0.161  | 0.154  | 0.096  | 0.081  | -0.174 | 0.312  | 0.219  | -7.059 | -6.759 | -7.489 | 0.143  | 0.384  | 0.249  | 0.175  |  | 1 |
| JW0969 | b0986 | ymcC   | 15 | 0.238  | 0.300  | -0.185 | -0.025 | 0.159  | -0.088 | 0.029  | 0.062  | 0.161  | 0.166  | 0.129  | -0.054 | 0.141  | 0.202  | 0.180  | -6.564 | -6.671 | -7.396 | -0.110 | 0.073  | 0.231  | 0.225  |  | 1 |
| JW0970 | b0987 | ymcD   | 15 | 0.119  | 0.309  | 0.043  | -0.108 | -0.166 | -0.065 | 0.275  | -0.058 | 0.015  | 0.203  | 0.197  | 0.070  | 0.389  | 0.383  | 0.459  | -4.368 | -4.926 | -5.155 | -0.019 | 0.157  | 0.360  | 0.303  |  | 1 |
| JW0973 | b0989 | cspH   | 14 | 0.303  | 0.633  | 0.276  | 0.356  | -0.123 | -0.192 | -0.100 | 0.085  | 0.330  | 0.626  | 0.314  | 0.558  | 0.498  | 0.363  | 0.363  | 0.581  | -0.352 | 0.034  | 0.522  | -0.031 | -0.698 | 0.554  |  | 1 |
| JW0974 | b0990 | cspG   | 14 | 0.030  | 0.141  | -0.100 | -0.056 | 0.317  | -0.137 | -0.065 | -0.106 | 0.291  | -0.077 | -0.055 | -0.069 | -0.157 | -0.086 | 0.068  | -0.051 | 0.038  | 0.001  | 0.040  | 0.128  | -0.031 | 0.184  |  | 1 |
| JW0975 | b0991 | sfa    | 7  | 0.212  | 0.277  | -0.289 | -0.003 | 0.462  | -0.126 | -0.073 | 0.290  | 0.322  | -0.003 | 0.061  | 0.121  | -0.006 | 0.198  | 0.178  | 0.139  | 0.126  | 0.213  | -0.113 | 0.070  | 0.129  | 0.267  |  | 1 |
| JW0977 | b0992 | ycyM   | 15 | 0.191  | 0.178  | -0.026 | -0.013 | -0.166 | -0.076 | 0.037  | -0.064 | 0.035  | 0.159  | 0.113  | 0.133  | 0.227  | 0.179  | 0.201  | -0.026 | 0.015  | 0.009  | 0.063  | 0.193  | 0.136  | 0.166  |  | 1 |
| JW0978 | b0993 | torS   | 13 | 0.287  | 0.136  | 0.019  | 0.147  | 0.242  | -0.009 | 0.096  | -0.057 | 0.126  | 0.047  | 0.041  | 0.047  | 0.132  | 0.128  | 0.070  | -0.045 | 0.001  | -0.053 | 0.165  | -0.022 | -0.090 | -0.110 |  | 1 |
| JW0979 | b0994 | torT   | 9  | 0.259  | -0.046 | -0.339 | -0.215 | -5.151 | -0.048 | -0.137 | -0.205 | -0.071 | -0.054 | -0.021 | -0.034 | -0.081 | -0.105 | -0.113 | -0.216 | -0.148 | -0.247 | -0.166 | -0.127 | -0.030 | 0.001  |  | 1 |
| JW0980 | b0995 | torR   | 6  | 0.179  | 0.238  | -0.049 | -0.219 | -2.544 | -0.029 | 0.183  | -0.283 | -0.209 | 0.111  | -0.010 | -0.083 | 0.077  | 0.110  | 0.069  | -0.216 | -0.212 | -0.290 | 0.117  | 0.229  | 0.107  | 0.169  |  | 1 |
| JW0981 | b0996 | torC   | 6  | 0.193  | 0.268  | 0.032  | 0.020  | 0.171  | -0.023 | 0.286  | 0.074  | 0.196  | 0.137  | 0.018  | -0.112 | 0.097  | 0.044  | 0.051  | 0.295  | 0.188  | 0.077  | 0.216  | 0.182  | 0.118  | 0.204  |  | 1 |
| JW0982 | b0997 | torA   | 6  | 0.318  | 0.142  | -0.122 | -0.161 | 0.091  | -0.062 | 0.117  | -0.035 | 0.129  | 0.021  | 0.057  | -0.198 | 0.061  | -0.073 | -0.002 | 0.053  | 0.166  | 0.074  | -0.034 | 0.229  | 0.226  | 0.040  |  | 1 |
| JW0983 | b0998 | torD   | 13 | -0.059 | 0.279  | 0.075  | -0.008 | 0.018  | -0.132 | 0.010  | -0.193 | 0.196  | 0.108  | 0.081  | 0.166  | -0.098 | -0.219 | -0.163 | -0.053 | 0.024  | 0.042  | 0.182  | 0.151  | 0.010  | -0.315 |  | 1 |
| JW0984 | b0999 | ycyD   | 15 | 0.152  | 0.115  | 0.125  | 0.073  | 0.081  | -0.082 | 0.102  | 0.003  | 0.083  | 0.088  | 0.041  | 0.134  | -0.067 | -0.020 | -0.114 | 0.041  | 0.093  | 0.254  | 0.184  | 0.311  | -0.086 | 0.221  |  | 1 |
| JW0985 | b1000 | cbpA   | 4  | 0.467  | 0.285  | 0.077  | 0.166  | 0.329  | 0.067  | 0.120  | 0.162  | 0.259  | 0.094  | 0.085  | 0.117  | 0.122  | 0.144  | 0.069  | 0.121  | 0.156  | 0.005  | 0.192  | 0.211  | 0.094  | 0.160  |  | 1 |
| JW0986 | b1001 | ycyE   | 15 | -0.568 | -0.986 | -0.901 | -1.792 | -4.853 | -0.090 | -0.536 | -4.712 | -4.202 | 0.050  | 0.084  | -1.116 | -3.628 | -4.182 | -4.298 | -4.541 | -4.305 | -4.731 | -0.707 | -0.678 | -1.416 | -0.816 |  | 1 |
| JW0987 | b1002 | agg    | 5  | 0.275  | 0.215  | 0.070  | -0.026 | -0.124 | -0.076 | 0.187  | -0.143 | 0.014  | 0.139  | 0.104  | -0.125 | 0.014  | 0.005  | -0.010 | 0.023  | -0.059 | -0.050 | 0.121  | 0.116  | 0.175  | 0.160  |  | 1 |
| JW0988 | b1003 | ycyJ   | 15 | 0.273  | 0.215  | -0.065 | 0.038  | 0.439  | -0.108 | 0.034  | 0.140  | 0.537  | -0.073 | -0.014 | 0.012  | -0.134 | -0.130 | 0.046  | 0.024  | 0.162  | -0.039 | 0.107  | 0.113  | -0.267 | 0.157  |  | 1 |
| JW0989 | b1004 | wrbA   | 1  | 0.088  | 0.078  | -0.146 | 0.025  | 0.191  | -0.140 | -0.061 | 0.166  | 0.380  | 0.192  | 0.056  | 0.060  | -0.050 | -0.040 | 0.080  | 0.207  | 0.272  | 0.241  | -0.048 | 0.200  | -5.437 | 0.140  |  | 1 |
| JW0990 | b1259 | (yciG) | 1  | -0.455 | 0.021  | -0.125 | -0.049 | 0.054  | 0.024  | -0.075 | -0.207 | 0.019  | 0.033  | 0.090  | 0.038  | -0.138 | -0.141 | -0.211 | -0.102 | 0.143  | -0.179 | -0.069 | -0.604 | -3.832 | 0.094  |  | 1 |
| JW0991 | b1006 | ycdG   | 15 | 0.296  | -0.155 | -0.162 | -0.028 | -0.018 | 0.050  | -0.015 | -0.062 | 0.050  | 0.127  | 0.028  | -0.157 | -0.059 | 0.010  | 0.002  | -0.086 | -0.008 | -0.170 | -0.043 | -0.009 | -5.975 | -0.022 |  | 1 |
| JW0992 | b1007 | 228#5  | 15 | 0.103  | -0.021 | -0.034 | -0.100 | -0.247 | 0.013  | -0.006 | -0.259 | -0.230 | 0.075  | -0.251 | -0.189 | -0.041 | 0.012  | -0.066 | -0.162 | -0.219 | -0.349 | 0.039  | -0.033 | -0.542 | -0.164 |  | 1 |
| JW0993 | b1008 | 228#6  | 15 | 0.060  | -0.105 | -0.099 | -0.099 | -0.139 | 0.023  | 0.041  | -0.158 | -0.068 | 0.086  | 0.034  | -0.374 | 0.052  | 0.057  | 0.028  | -0.182 | -0.097 | -0.273 | -0.016 | 0.076  | -0.054 | -0.119 |  | 1 |
| JW0994 | b1009 | 228#7  | 15 | 0.271  | 0.015  | 0.049  | 0.052  | 0.110  | -0.060 | 0.054  | -0.006 | 0.164  | 0.079  | 0.016  | -0.225 | 0.039  | -0.074 | 0.021  | 0.065  | 0.089  | -0.086 | 0.150  | -0.001 | -0.121 | -0.179 |  | 1 |
| JW0995 | b1010 | ycdK   | 15 | 0.015  | 0.048  | -0.048 | -0.077 | 0.000  | -0.016 | 0.030  | -0.033 | -0.026 | -0.084 | -0.037 | 0.029  | -0.025 | -0.069 | 0.110  | -0.436 | -0.290 | -0.331 | 0.147  | 0.082  | 0.124  | 0.232  |  | 1 |
| JW0996 | b1011 | 228#9  | 15 | 0.266  | 0.019  | -0.202 | -0.020 | 0.230  | -0.050 | -0.061 | 0.042  | 0.023  | 0.021  | -0.042 | -0.044 | -0.008 | -0.007 | -0.026 | -0.029 | 0.149  | -0.018 | 0.042  | 0.125  | 0.066  | 0.082  |  | 1 |
| J      |       |        |    |        |        |        |        |        |        |        |        |        |        |        |        |        |        |        |        |        |        |        |        |        |        |  |   |

|        |       |             |    |        |        |        |        |        |        |        |        |        |        |        |        |        |        |        |        |        |        |        |         |         |        |
|--------|-------|-------------|----|--------|--------|--------|--------|--------|--------|--------|--------|--------|--------|--------|--------|--------|--------|--------|--------|--------|--------|--------|---------|---------|--------|
| JW1048 | b1061 | dinI        | 10 | 0.311  | -0.013 | -0.054 | -0.096 | 0.305  | 0.014  | 0.162  | 0.133  | 0.321  | 0.022  | 0.127  | -0.081 | 0.101  | 0.067  | 0.120  | 0.222  | 0.260  | 0.101  | -0.040 | Invalid | Invalid | 0.157  |
| JW1049 | b1062 | pyrC        | 8  | 0.239  | 0.075  | -0.041 | -0.037 | 0.111  | -0.009 | 0.042  | 0.040  | 0.207  | 0.106  | 0.093  | 0.019  | 0.034  | 0.140  | 0.089  | -0.085 | 0.027  | -0.015 | 0.071  | 0.272   | 0.207   | 0.203  |
| JW1050 | b1063 | yceB        | 15 | 0.326  | 0.161  | -0.058 | 0.022  | 0.281  | 0.075  | 0.128  | 0.085  | 0.239  | 0.026  | 0.095  | -0.024 | 0.115  | 0.163  | 0.114  | 0.121  | 0.083  | 0.101  | 0.255  | -0.051  | 0.128   |        |
| JW1051 | b1064 | grxB        | 6  | 0.484  | 0.166  | -0.029 | 0.048  | 0.372  | 0.030  | 0.125  | 0.240  | 0.340  | 0.001  | 0.083  | -0.083 | 0.099  | 0.155  | 0.098  | 0.248  | 0.259  | 0.197  | 0.151  | 0.220   | 0.139   | 0.079  |
| JW1052 | b1065 | yqjV        | 15 | 0.220  | -0.005 | -0.206 | -0.124 | 0.024  | 0.009  | 0.115  | 0.091  | 0.131  | 0.089  | 0.054  | -0.290 | 0.093  | 0.140  | 0.137  | 0.192  | 0.121  | 0.051  | -0.143 | 0.172   | 0.156   | 0.125  |
| JW1053 | b1066 | rimJ        | 12 | 0.323  | 0.208  | -0.003 | -0.080 | 0.141  | -0.079 | 0.226  | 0.096  | 0.383  | 0.189  | 0.118  | -0.118 | 0.222  | 0.198  | 0.220  | 0.323  | 0.270  | 0.243  | 0.099  | 0.273   | 0.308   | 0.235  |
| JW1054 | b1067 | yceH        | 15 | 0.050  | 0.166  | 0.185  | 0.048  | 0.021  | -0.110 | 0.157  | -0.007 | 0.234  | 0.060  | 0.142  | 0.116  | -0.175 | -0.200 | -0.167 | 0.030  | 0.085  | -0.063 | 0.275  | 0.227   | 0.169   | -0.158 |
| JW1055 | b1068 | mviM        | 15 | 0.146  | 0.143  | -0.007 | -0.072 | -0.241 | -0.029 | -0.056 | -0.396 | -0.152 | 0.099  | 0.104  | -0.117 | -0.147 | -0.260 | -0.167 | -0.257 | -0.363 | -0.370 | 0.078  | -0.093  | -0.245  | -0.196 |
| JW1056 | b1069 | mviN        | 15 | 0.301  | 0.187  | -0.015 | 0.063  | 0.126  | 0.012  | 0.089  | 0.136  | 0.177  | 0.170  | 0.131  | 0.018  | 0.237  | 0.270  | 0.168  | 0.132  | 0.158  | 0.100  | 0.115  | 0.249   | 0.115   | 0.103  |
| JW1057 | b1070 | flgN        | 3  | 0.331  | 0.247  | -0.021 | 0.035  | 0.167  | -0.084 | 0.147  | 0.076  | 0.289  | 0.063  | -0.009 | -0.004 | 0.214  | 0.247  | 0.188  | 0.314  | 0.174  | 0.216  | 0.192  | 0.327   | 0.091   | 0.132  |
| JW1058 | b1071 | flgM        | 3  | 0.391  | 0.265  | 0.206  | 0.107  | 0.141  | -0.031 | 0.198  | 0.028  | 0.320  | 0.073  | 0.077  | -0.127 | 0.157  | 0.141  | 0.099  | 0.275  | 0.255  | 0.111  | 0.236  | 0.253   | 0.168   | 0.053  |
| JW1059 | b1072 | flgA        | 3  | -0.389 | 0.090  | 0.068  | 0.010  | -0.003 | -0.172 | 0.026  | 0.054  | 0.298  | 0.155  | 0.157  | -0.049 | 0.089  | -0.186 | 0.138  | 0.086  | 0.067  | 0.146  | 0.105  | 0.190   | 0.101   | -0.117 |
| JW1060 | b1073 | flgB        | 3  | 0.271  | 0.195  | 0.160  | 0.178  | 0.322  | -0.090 | 0.032  | 0.223  | 0.350  | 0.121  | 0.125  | 0.050  | 0.195  | 0.183  | 0.153  | 0.402  | 0.338  | 0.201  | 0.261  | 0.237   | 0.156   | 0.193  |
| JW1061 | b1074 | flgC        | 3  | 0.328  | 0.215  | 0.081  | 0.030  | -0.050 | -0.095 | 0.067  | -0.068 | 0.106  | 0.160  | 0.124  | 0.156  | 0.243  | 0.173  | 0.153  | 0.202  | 0.111  | 0.182  | 0.158  | 0.185   | 0.116   | 0.112  |
| JW1062 | b1075 | flgD        | 3  | 0.435  | 0.244  | 0.084  | 0.082  | 0.132  | -0.133 | 0.167  | 0.025  | 0.287  | 0.218  | 0.061  | -0.080 | 0.233  | 0.213  | 0.228  | 0.193  | 0.154  | 0.056  | 0.238  | 0.363   | 0.207   | 0.190  |
| JW1063 | b1076 | flgE        | 3  | 0.128  | 0.061  | -0.302 | -0.129 | 0.106  | -0.050 | 0.008  | -0.085 | 0.150  | 0.144  | 0.064  | -0.014 | 0.201  | 0.137  | 0.168  | 0.076  | -0.030 | -0.002 | 0.032  | 0.289   | -0.116  | -0.036 |
| JW1064 | b1077 | flgF        | 3  | -0.205 | 0.074  | -6.354 | -0.709 | 0.012  | -0.170 | -0.021 | 0.076  | 0.295  | 0.165  | 0.127  | 0.039  | 0.036  | -0.236 | 0.141  | 0.066  | 0.200  | 0.083  | 0.132  | 0.152   | 0.091   | 0.141  |
| JW1065 | b1078 | flgG        | 3  | 0.101  | 0.180  | -5.255 | -0.680 | 0.107  | -0.131 | 0.085  | 0.038  | 0.269  | 0.190  | 0.141  | 0.007  | 0.182  | 0.150  | 0.214  | 0.133  | 0.245  | 0.138  | 0.214  | 0.318   | 0.152   | 0.184  |
| JW1066 | b1079 | flgH        | 3  | 0.383  | 0.291  | -0.626 | -0.123 | 0.209  | -0.052 | 0.126  | 0.115  | 0.247  | 0.154  | 0.098  | 0.113  | 0.269  | 0.227  | 0.222  | 0.204  | 0.222  | 0.262  | 0.269  | 0.333   | 0.166   | 0.198  |
| JW1067 | b1080 | flgI        | 3  | 0.122  | 0.151  | -0.016 | 0.023  | 0.142  | 0.027  | 0.039  | 0.016  | 0.159  | 0.098  | 0.029  | -0.004 | 0.170  | 0.185  | 0.141  | 0.139  | 0.116  | 0.176  | 0.101  | 0.222   | 0.135   | 0.085  |
| JW1068 | b1081 | flgJ        | 3  | 0.224  | 0.219  | 0.089  | 0.071  | 0.153  | -0.045 | 0.188  | -0.007 | 0.203  | 0.150  | 0.068  | -0.063 | 0.111  | 0.077  | 0.123  | 0.126  | 0.155  | 0.143  | 0.198  | 0.224   | 0.182   | 0.139  |
| JW1069 | b1082 | flgK        | 3  | 0.139  | -0.008 | -0.188 | -0.107 | 0.023  | -0.044 | -0.091 | -0.053 | 0.120  | 0.131  | 0.091  | -0.328 | 0.011  | -0.002 | -0.032 | 0.047  | -0.053 | -0.110 | -0.075 | -0.058  | 0.072   | 0.027  |
| JW1070 | b1083 | flgL        | 3  | -0.436 | -0.184 | -0.130 | -0.178 | -0.156 | -0.189 | -0.062 | -0.199 | 0.117  | 0.100  | 0.047  | -0.191 | -0.179 | -0.365 | -0.072 | -0.112 | 0.015  | -0.104 | 0.021  | -0.308  | -0.111  | -0.050 |
| JW1071 | b1084 | rnc         | 8  | 0.045  | -0.013 | 0.001  | 0.022  | 0.053  | -0.023 | 0.000  | -0.016 | 0.133  | -0.025 | -0.050 | 0.018  | -0.163 | -0.061 | -0.071 | -0.144 | 0.065  | -0.083 | 0.152  | -0.148  | -0.060  | -0.073 |
| JW1072 | b1086 | fluC        | 12 | 0.351  | 0.033  | -0.153 | 0.041  | 0.309  | 0.001  | -0.091 | 0.207  | 0.371  | 0.090  | 0.096  | -0.034 | 0.005  | -0.092 | -0.040 | 0.187  | 0.290  | 0.069  | 0.000  | 0.109   | 0.093   | -0.017 |
| JW1073 | b1087 | yceF        | 15 | 0.325  | 0.106  | -0.123 | 0.102  | 0.309  | -0.032 | 0.082  | 0.287  | 0.352  | 0.092  | 0.081  | -0.039 | 0.039  | 0.055  | 0.093  | 0.281  | 0.365  | 0.238  | 0.110  | 0.267   | 0.271   | 0.186  |
| JW1074 | b1088 | yceD        | 15 | 0.477  | 0.253  | 0.105  | 0.077  | 0.472  | 0.017  | 0.219  | 0.291  | 0.457  | 0.033  | 0.077  | -0.061 | 0.196  | 0.080  | 0.121  | 0.359  | 0.374  | 0.262  | 0.282  | 0.315   | 0.273   | 0.231  |
| JW1075 | b1089 | rpmF        | 12 | 0.455  | 0.496  | 0.237  | 0.159  | 0.190  | -0.200 | -0.047 | 0.217  | 0.527  | 0.282  | 0.183  | 0.116  | 0.329  | 0.054  | 0.177  | 0.697  | 0.159  | 0.191  | 0.552  | 0.226   | -0.225  | 0.471  |
| JW1076 | b1090 | plsX        | 7  | 0.360  | 0.138  | -0.146 | -0.004 | 0.433  | -0.008 | 0.087  | 0.323  | 0.410  | -0.038 | 0.072  | -0.141 | 0.093  | 0.012  | 0.100  | 0.256  | 0.345  | 0.241  | 0.014  | 0.206   | 0.118   | 0.211  |
| JW1077 | b1091 | fabH        | 7  | -0.072 | 0.012  | -0.032 | -0.041 | 0.039  | -0.072 | -0.160 | 0.030  | 0.266  | 0.137  | 0.219  | 0.009  | 0.035  | -0.191 | 0.064  | 0.006  | 0.186  | 0.112  | -0.032 | 0.323   | 0.207   | 0.098  |
| JW1078 | b1092 | fabD        | 7  | 0.136  | 0.090  | 0.009  | 0.115  | 0.237  | -0.051 | -0.042 | 0.239  | 0.302  | 0.117  | 0.129  | 0.117  | 0.049  | 0.037  | 0.046  | 0.232  | 0.310  | 0.158  | 0.089  | 0.298   | 0.212   | 0.028  |
| JW1079 | b1093 | fabG        | 7  | 0.616  | 0.267  | 0.160  | 0.256  | 0.535  | 0.096  | 0.193  | 0.393  | 0.450  | 0.038  | 0.067  | 0.027  | 0.185  | 0.217  | 0.225  | 0.297  | 0.361  | 0.286  | 0.327  | 0.326   | 0.206   | 0.156  |
| JW1080 | b1094 | acpP        | 7  | 0.339  | 0.270  | 0.111  | 0.191  | 0.377  | -0.063 | 0.219  | 0.248  | 0.401  | 0.155  | 0.098  | 0.018  | 0.237  | 0.189  | 0.230  | 0.352  | 0.313  | 0.364  | 0.221  | 0.379   | 0.291   | 0.289  |
| JW1081 | b1095 | fabF        | 7  | 0.376  | 0.151  | 0.041  | 0.086  | 0.345  | 0.024  | 0.167  | 0.221  | 0.351  | 0.103  | 0.101  | -0.114 | 0.129  | 0.088  | 0.095  | 0.238  | 0.278  | 0.252  | 0.112  | 0.263   | 0.158   | 0.157  |
| JW1082 | b1096 | pabC        | 2  | -0.061 | -0.029 | -0.158 | -0.149 | 0.047  | -0.194 | -0.102 | 0.067  | 0.270  | 0.047  | 0.077  | 0.131  | -0.075 | -0.296 | 0.004  | 0.057  | 0.172  | 0.217  | -0.033 | 0.065   | 0.167   | 0.112  |
| JW1083 | b1097 | yceG        | 15 | 0.023  | -0.043 | -0.307 | -0.180 | 0.077  | -0.062 | -0.124 | 0.161  | 0.200  | 0.065  | 0.015  | -0.035 | -0.116 | -0.090 | 0.008  | -0.017 | 0.138  | 0.198  | -0.080 | 0.029   | 0.024   | 0.045  |
| JW1084 | b1098 | trk         | 8  | 0.516  | 0.290  | 0.035  | 0.366  | 0.226  | 0.023  | 0.093  | 0.241  | 0.197  | -0.063 | 0.066  | 0.077  | 0.187  | 0.167  | 0.228  | -0.021 | 0.270  | 0.092  | 0.220  | 0.415   | 0.260   | 0.259  |
| JW1085 | b1099 | holB        | 10 | 0.279  | 0.179  | -0.031 | 0.034  | 0.147  | 0.093  | 0.116  | 0.126  | 0.148  | 0.067  | 0.031  | -0.058 | 0.035  | 0.061  | 0.070  | 0.056  | 0.233  | -0.044 | 0.202  | 0.186   | 0.068   | 0.116  |
| JW1086 | b1100 | ycfH        | 15 | 0.274  | 0.195  | -0.073 | -0.066 | 0.253  | 0.016  | 0.195  | 0.048  | 0.183  | -0.004 | 0.007  | -0.225 | 0.125  | 0.080  | 0.154  | 0.070  | 0.123  | 0.082  | 0.085  | 0.260   | 0.163   | 0.126  |
| JW1087 | b1101 | ptsG        | 11 | 0.334  | 0.236  | 0.172  | 0.318  | 0.462  | 0.111  | 0.134  | 0.375  | 0.349  | 0.202  | 0.162  | 0.212  | 0.325  | 0.253  | 0.230  | 0.255  | 0.251  | 0.309  | 0.235  | 0.352   | 0.350   | 0.235  |
| JW1088 | b1102 | flhE        | 11 | 0.219  | 0.142  | -0.051 | 0.002  | 0.211  | 0.026  | 0.158  | 0.267  | 0.234  | 0.160  | 0.088  | -0.047 | 0.069  | 0.119  | 0.210  | 0.133  | 0.172  | 0.122  | 0.196  | 0.258   | 0.197   | 0.310  |
| JW1089 | b1103 | ycfF        | 15 | 0.252  | 0.270  | 0.186  | 0.241  | 0.422  | -0.101 | 0.093  | 0.280  | 0.444  | 0.134  | 0.148  | 0.205  | 0.199  | 0.091  | 0.245  | 0.225  | 0.294  | 0.431  | 0.272  | 0.442   | 0.291   | 0.327  |
| JW1090 | b1104 | ycfL        | 15 | 0.084  | 0.047  | -0.114 | 0.073  | 0.202  | 0.044  | -0.037 | -0.022 | 0.164  | 0.075  | 0.146  | 0.028  | 0.192  | 0.055  | 0.036  | -0.032 | -0.068 | -0.034 | -0.034 | 0.118   | 0.131   | 0.039  |
| JW1091 | b1105 | ycfM        | 15 | 0.499  | 0.294  | 0.134  | 0.261  | 0.383  | 0.085  | 0.188  | 0.178  | 0.340  | 0.118  | 0.084  | 0.043  | 0.246  | 0.260  | 0.284  | 0.177  | 0.214  | 0.242  | 0.300  | 0.385   | 0.311   | 0.306  |
| JW1092 | b1106 | ycfN        | 15 | 0.430  | 0.203  | -0.124 | 0.098  | 0.356  | 0.104  | 0.047  | 0.237  | 0.315  | 0.063  | 0.071  | -0.121 | 0.119  | 0.091  | 0.135  | 0.188  | 0.191  | 0.130  | 0.025  | 0.283   | 0.189   | 0.187  |
| JW1093 | b1107 | nagZ / ycfO | 14 | -0.199 | 0.057  | -0.177 | -0.168 | 0.028  | -0.005 | -0.011 | -0.089 | 0.026  | 0.035  | 0.076  | -0.121 | -0.112 | -0.109 | -0.088 | -0.054 | -0.143 | -0.093 | -0.100 | 0.125   | 0.063   | -0.061 |
| JW1094 | b1108 | ycfP        | 15 | -0.303 | -0.013 | -0.218 | -0.358 | -0.392 | -0.201 | -0.167 | -0.361 | -0.118 | 0.040  | 0.008  | -0.011 | -0.211 | -0.391 | -0.058 | -0.315 | -0.255 | -0.164 | -0.069 | 0.015   | 0.185   | 0.062  |
| JW1095 | b1109 | ndh         | 6  | 0.149  | 0.153  | -0.048 | -0.022 | 0.015  | -0.011 | 0.089  | 0.022  | 0.125  | 0.115  | 0.016  | 0.152  | 0.080  | 0.124  | 0.218  | -0.148 | -0.026 | -0.010 | 0.186  | 0.342   | 0       |        |



|        |       |                  |    |     |         |         |         |         |         |         |         |         |         |         |         |         |         |         |         |         |         |         |         |         |         |         |         |   |
|--------|-------|------------------|----|-----|---------|---------|---------|---------|---------|---------|---------|---------|---------|---------|---------|---------|---------|---------|---------|---------|---------|---------|---------|---------|---------|---------|---------|---|
| JW1138 | b1152 | 241#8            | 15 | e14 | -7.838  | -7.051  | -7.216  | -7.051  | -7.569  | -0.096  | -6.707  | -1.388  | 0.997   | 0.951   | -6.433  | -7.238  | -7.286  | -7.176  | -7.231  | -7.007  | 0.266   | -7.575  | 0.042   | -7.423  | -7.036  | -5.824  | 1       |   |
| JW1139 | b1153 | 241#9            | 15 | e14 | -4.957  | -5.829  | -4.216  | -3.448  | -5.569  | -0.511  | -4.330  | -5.788  | 0.651   | 0.235   | -5.518  | -4.697  | -4.718  | -5.933  | -6.077  | -6.085  | -0.780  | -6.761  | -0.822  | -3.078  | -4.930  | -5.669  | 1       |   |
| JW1140 | b1154 | ycfK             | 15 | e14 | -4.350  | -5.412  | -3.374  | -2.525  | -5.034  | -1.084  | -3.687  | -5.810  | -0.110  | -0.367  | -5.250  | -3.850  | -3.874  | -5.754  | -5.928  | -5.865  | -1.247  | -6.311  | -1.201  | -2.209  | -4.056  | -5.343  | 1       |   |
| JW1141 | b1155 | ymfS             | 15 | e14 | -4.078  | -5.717  | -3.827  | -3.489  | -3.039  | -4.026  | -4.582  | -5.605  | -2.605  | -2.620  | -5.748  | -5.330  | -5.744  | -5.639  | -5.560  | -5.611  | -4.267  | -6.104  | -2.860  | -6.090  | -5.693  | -5.475  | 1       |   |
| JW1142 | b1156 | ycfA / tfaE      | 14 | e14 | -2.870  | -6.004  | -1.445  | -0.712  | -0.680  | -1.792  | -2.823  | -6.291  | -0.492  | -1.156  | -6.148  | -5.779  | -6.402  | -6.135  | -6.172  | -1.790  | -3.470  | -6.890  | -0.214  | -6.255  | -5.816  | -5.773  | 1       |   |
| JW1143 | b1157 | ycfE             | 15 | e14 | -4.878  | -6.083  | -2.786  | -0.904  | -0.411  | -1.302  | -4.398  | -6.238  | 0.414   | -0.841  | -5.982  | -5.142  | -5.588  | -5.864  | -5.960  | -1.027  | -2.435  | -6.815  | -0.522  | -4.548  | -5.205  | -5.374  | 1       |   |
| JW1144 | b1158 | pin              | 14 | e14 | -0.789  | -5.767  | -1.994  | -1.878  | -2.754  | -1.986  | -0.642  | -5.283  | -0.242  | -0.262  | -4.876  | -0.442  | -2.729  | -4.103  | -3.179  | -5.127  | -5.699  | -4.901  | -1.350  | -0.826  | -0.565  | -0.377  | 1       |   |
| JW1145 | b1159 | mcrA             | 9  | e14 | -5.820  | -5.391  | -5.772  | -6.025  | -5.757  | -5.571  | -4.890  | -6.191  | -4.904  | -4.794  | -5.905  | -4.931  | -5.646  | -5.431  | -5.147  | -5.991  | -5.627  | -6.053  | -4.921  | -6.178  | -4.814  | -4.915  | 1       |   |
| JW1147 | b1160 | ycgW             | 15 |     | -3.926  | -0.219  | -0.755  | -1.380  | -3.762  | 0.175   | -0.371  | -3.784  | -3.496  | 0.134   | -1.507  | 0.163   | -0.226  | -0.180  | -0.181  | -3.646  | -3.665  | -3.894  | -0.485  | -4.232  | -0.167  | -0.299  | 1       |   |
| JW1148 | b1161 | ycgX             | 15 |     | -4.706  | 0.270   | -0.165  | 0.026   | 0.174   | 0.315   | 0.225   | 0.196   | 0.000   | 0.136   | -4.550  | -0.541  | 0.100   | 0.222   | 0.245   | 0.086   | 0.000   | 0.011   | 0.062   | -5.351  | 0.285   | 0.230   | 1       |   |
| JW1149 | b1162 | ycgE             | 9  |     | -6.716  | 0.244   | 0.003   | 0.207   | 0.378   | 0.204   | 0.255   | 0.352   | 0.153   | 0.120   | -6.085  | 0.035   | 0.156   | 0.213   | 0.246   | 0.270   | 0.159   | 0.267   | 0.178   | -6.840  | 0.305   | 0.364   | 1       |   |
| JW1150 | b1163 | 242#1            | 15 |     | -7.288  | 0.268   | 0.033   | 0.105   | -0.088  | 0.156   | 0.153   | -0.044  | -0.114  | 0.199   | -6.569  | 0.234   | 0.071   | 0.302   | 0.297   | -0.194  | -0.281  | -0.138  | 0.077   | -6.847  | 0.152   | 0.079   | 1       |   |
| JW1151 | b1164 | ycgZ             | 15 |     | -4.068  | 0.188   | -0.033  | 0.137   | 0.300   | 0.149   | 0.043   | 0.197   | 0.052   | -0.005  | -3.791  | -0.029  | 0.107   | 0.267   | 0.130   | -0.018  | -0.001  | -0.011  | 0.063   | -4.262  | Invalid | -3.583  | 1       |   |
| JW1152 | b1165 | ymgA             | 15 |     | -4.822  | 0.300   | -0.043  | 0.142   | 0.370   | 0.272   | 0.095   | 0.405   | 0.186   | 0.057   | -4.440  | 0.145   | 0.172   | 0.401   | 0.260   | 0.329   | 0.193   | 0.240   | 0.114   | -4.854  | 0.256   | -3.739  | 1       |   |
| JW1153 | b1166 | 242#1.4          | 15 |     | -5.011  | 0.339   | 0.051   | -0.044  | -0.253  | 0.322   | 0.284   | -0.038  | -0.248  | 0.180   | -4.401  | 0.002   | 0.169   | 0.603   | 0.351   | -0.075  | -0.336  | -0.405  | 0.156   | -4.640  | 0.159   | -3.397  | 1       |   |
| JW1155 | b1168 | (yahA)           | 15 |     | -7.766  | 0.234   | -0.147  | -0.418  | -1.227  | 0.015   | 0.105   | -1.183  | -1.218  | 0.118   | 0.133   | -1.144  | -0.378  | 0.093   | 0.083   | -1.215  | -1.344  | -0.250  | -0.156  | 0.035   | 0.039   | -6.379  | 1       |   |
| JW1156 | b1169 | 243#0.1          | 15 |     | -5.459  | 0.119   | -0.075  | -0.061  | -0.024  | -0.011  | 0.252   | -0.024  | -0.061  | 0.048   | 0.090   | 0.164   | -4.845  | -0.010  | 0.107   | -0.184  | -0.256  | -0.214  | 0.088   | 0.257   | -0.086  | -5.048  | 1       |   |
| JW1157 | b1169 | 243#1            | 15 |     | -7.015  | -4.052  | -4.630  | -1.824  | -0.886  | 0.295   | -3.946  | -0.971  | -0.945  | 0.072   | 0.121   | 0.157   | -6.699  | -4.020  | -3.835  | -1.146  | -1.266  | -1.120  | -4.221  | -3.939  | -3.997  | -6.383  | 1       |   |
| JW1158 | b1170 | (aidA)           | 3  |     | -5.650  | 0.019   | -0.240  | -0.391  | -1.162  | 0.276   | 0.018   | -1.047  | -1.426  | 0.025   | -0.001  | 0.158   | -5.398  | 0.031   | -0.002  | -1.177  | -1.362  | -1.163  | -0.076  | 0.292   | -0.038  | -3.177  | 1       |   |
| JW1159 | b1171 | ymgD             | 15 |     | -4.933  | 0.173   | 0.096   | 0.318   | 0.266   | 0.106   | 0.206   | 0.317   | 0.150   | 0.327   | 0.227   | 0.279   | -4.563  | 0.180   | 0.236   | 0.246   | 0.154   | 0.280   | 0.179   | 0.418   | 0.448   | 0.024   | 1       |   |
| JW1162 | b1173 | 243#5.1          | 15 |     | Invalid | 1 |
| JW1164 | b1175 | minD             | 4  |     | 0.300   | 0.275   | 0.085   | 0.502   | 0.572   | 0.445   | 0.199   | 0.504   | 0.147   | 0.152   | 0.126   | 0.119   | 0.159   | 0.289   | 0.195   | 0.195   | 0.251   | 0.251   | 0.252   | 0.127   | 0.124   | 1       |         |   |
| JW1165 | b1176 | minC             | 4  |     | 0.405   | 0.179   | -0.064  | 0.468   | 0.636   | 0.406   | 0.157   | 0.620   | 0.211   | 0.085   | 0.105   | -0.003  | -0.085  | 0.151   | 0.111   | 0.297   | 0.141   | 0.145   | 0.064   | 0.195   | 0.066   | 0.078   | 1       |   |
| JW1166 | b1177 | ycgJ             | 15 |     | 0.156   | 0.017   | -0.055  | 0.245   | 0.428   | 0.231   | 0.267   | 0.405   | 0.228   | 0.124   | 0.141   | -0.181  | 0.268   | 0.215   | 0.269   | 0.377   | 0.052   | 0.429   | 0.037   | 0.223   | 0.203   | 0.007   | 1       |   |
| JW1167 | b1178 | ycgK             | 15 |     | 0.158   | 0.157   | -0.273  | -0.053  | 0.136   | 0.252   | 0.028   | 0.100   | -0.028  | 0.083   | 0.103   | -0.086  | -0.068  | 0.083   | -0.005  | 0.026   | -0.076  | -0.011  | -0.149  | -0.324  | 0.097   | -0.121  | 1       |   |
| JW1168 | b1179 | ycgL             | 15 |     | 0.473   | 0.275   | 0.112   | 0.459   | 0.702   | 0.289   | 0.330   | 0.521   | 0.440   | 0.069   | 0.129   | 0.112   | 0.255   | 0.266   | 0.245   | 0.387   | 0.461   | 0.452   | 0.261   | 0.357   | 0.359   | 0.303   | 1       |   |
| JW1169 | b1180 | 243#12           | 15 |     | 0.192   | 0.127   | -0.120  | 0.122   | 0.518   | 0.237   | 0.170   | 0.403   | 0.184   | 0.178   | 0.074   | -0.210  | 0.177   | 0.106   | 0.163   | 0.271   | 0.347   | 0.402   | -0.004  | 0.282   | 0.299   | 0.261   | 1       |   |
| JW1170 | b1181 | ycgN             | 15 |     | 0.029   | 0.197   | -0.134  | 0.226   | 0.526   | 0.097   | 0.159   | 0.528   | 0.364   | 0.095   | 0.059   | 0.165   | 0.070   | 0.173   | 0.234   | 0.306   | 0.254   | 0.384   | 0.164   | 0.201   | 0.270   | 0.310   | 1       |   |
| JW1171 | b1182 | clpA / sheA/hlyE | 14 |     | 0.370   | 0.221   | -0.245  | -0.566  | -1.371  | 0.235   | 0.083   | -1.349  | -1.477  | 0.052   | 0.146   | 0.075   | 0.032   | 0.122   | 0.101   | -1.753  | -1.777  | -1.517  | -0.014  | 0.235   | 0.213   | 0.222   | 1       |   |
| JW1172 | b1183 | umuD             | 10 |     | 0.389   | 0.152   | -0.024  | 0.123   | 0.324   | 0.186   | 0.205   | 0.320   | 0.137   | 0.084   | 0.108   | -0.008  | 0.089   | 0.170   | 0.119   | 0.234   | 0.180   | 0.105   | 0.089   | 0.234   | 0.167   | 0.187   | 1       |   |
| JW1173 | b1184 | umuC             | 10 |     | 0.290   | 0.118   | -0.057  | 0.099   | 0.309   | 0.202   | 0.136   | 0.291   | 0.082   | 0.046   | 0.067   | -0.081  | 0.068   | 0.130   | 0.083   | 0.152   | 0.123   | 0.047   | 0.041   | 0.211   | 0.130   | 0.154   | 1       |   |
| JW1174 | b1185 | dsbB             | 3  |     | 0.263   | 0.146   | 0.049   | 0.049   | 0.332   | 0.059   | 0.226   | 0.138   | 0.139   | 0.131   | 0.049   | -0.133  | 0.153   | 0.049   | 0.120   | 0.113   | 0.134   | 0.088   | 0.246   | 0.329   | 0.164   | 0.195   | 1       |   |
| JW1175 | b1186 | nhaB             | 11 |     | 0.000   | 0.068   | -0.097  | 0.139   | 0.172   | 0.081   | 0.006   | 0.231   | 0.078   | 0.088   | 0.073   | 0.195   | -0.001  | 0.093   | 0.122   | -0.009  | 0.090   | -0.039  | 0.026   | 0.255   | 0.146   | 0.103   | 1       |   |
| JW1176 | b1187 | fadR             | 6  |     | 0.009   | 0.122   | -0.023  | 0.005   | 0.035   | 0.133   | 0.032   | -0.014  | -0.020  | 0.169   | 0.114   | 0.223   | 0.319   | 0.409   | 0.253   | -0.089  | -0.019  | -0.097  | 0.090   | 0.260   | 0.076   | 0.144   | 1       |   |
| JW1177 | b1188 | ycgB             | 15 |     | 0.273   | 0.117   | -0.109  | 0.126   | 0.217   | 0.168   | 0.114   | 0.225   | 0.064   | 0.147   | 0.142   | 0.176   | 0.150   | 0.171   | 0.080   | 0.111   | 0.082   | 0.058   | 0.038   | 0.226   | 0.125   | 0.061   | 1       |   |
| JW1178 | b1189 | dadA             | 5  |     | 0.354   | 0.012   | -0.141  | 0.107   | 0.207   | 0.156   | 0.018   | 0.165   | -0.008  | 0.106   | 0.050   | 0.044   | 0.029   | 0.057   | -0.013  | 0.058   | 0.025   | 0.092   | 0.061   | 0.243   | 0.098   | -0.008  | 1       |   |
| JW1179 | b1190 | dadX / alr2      | 5  |     | 0.196   | 0.519   | -0.029  | 0.071   | 0.312   | 0.092   | 0.058   | 0.154   | 0.118   | 0.030   | 0.104   | 0.082   | -0.006  | 0.077   | 0.053   | -0.015  | 0.095   | -0.026  | 0.167   | 0.288   | 0.065   | 0.123   | 1       |   |
| JW1180 | b1191 | ycgO             | 11 |     | 0.045   | 0.036   | -0.162  | -0.062  | -0.076  | 0.053   | 0.017   | -0.092  | -0.089  | 0.189   | 0.101   | -0.015  | 0.026   | 0.081   | 0.001   | -0.117  | -0.132  | -0.193  | 0.037   | 0.097   | -0.107  | -0.646  | 1       |   |
| JW1181 | b1192 | ldcA / ycgQ      | 14 |     | 0.172   | -0.022  | -0.085  | -0.031  | 0.100   | 0.001   | 0.082   | -0.082  | 0.075   | 0.141   | 0.089   | -0.085  | 0.060   | 0.048   | 0.085   | -0.031  | -0.055  | -0.047  | 0.041   | 0.170   | 0.132   | 0.130   | 1       |   |
| JW1182 | b1193 | mltE             | 3  |     | 0.212   | 0.173   | -0.082  | 0.072   | 0.397   | -0.109  | 0.094   | 0.181   | 0.282   | -0.043  | 0.025   | 0.147   | -0.031  | -0.022  | 0.142   | 0.098   | 0.131   | 0.166   | 0.241   | 0.251   | 0.189   | 0.185   | 1       |   |
| JW1183 | b1194 | ycgR             | 15 |     | 0.412   | 0.145   | -0.195  | -0.018  | 0.351   | 0.007   | -0.029  | 0.066   | 0.146   | -0.035  | 0.040   | 0.045   | -0.087  | 0.010   | -0.007  | -0.041  | 0.033   | 0.084   | 0.042   | 0.389   | 0.144   | 0.099   | 1       |   |
| JW1184 | b1195 | lag1             | 6  |     | 0.116   | 0.048   | -0.166  | -0.203  | -0.209  | 0.094   | 0.092   | -0.377  | -1.079  | 0.073   | 0.066   | 0.056   | -0.176  | -0.178  | -0.168  | -0.359  | -0.303  | -0.579  | 0.032   | -0.334  | -0.207  | -0.445  | 1       |   |
| JW1185 | b1196 | ycgY             | 15 |     | -3.502  | 0.335   | -0.095  | -1.025  | -4.072  | 0.139   | 0.235   | -3.671  | -3.472  | 0.043   | 0.103   | 0.046   | 0.115   | 0.235   | 0.174   | -4.073  | -3.909  | -4.094  | 0.123   | 0.323   | 0.165   | -4.094  | 1       |   |
| JW1186 | b1197 | ireA             | 4  |     | 0.109   | 0.259   | -0.041  | 0.037   | 0.279   | 0.128   | 0.261   | 0.134   | 0.084   | 0.128   | 0.100   | 0.020   | 0.201   | 0.209   | 0.182   | 0.085   | 0.139   | 0.077   | 0.244   | 0.336   | 0.179   | -3.966  | 1       |   |
| JW1189 | b1198 | ycgC / dhaM      | 15 |     | 0.237   | 0.152   | -0.081  | -0.071  | 0.114   | 0.039   | 0.214   | 0.090   | 0.075   | 0.169   | 0.067   | -0.114  | 0.131   | 0.115   | 0.153   | 0.110   | 0.184   | 0.094   | 0.109   | 0.302   | 0.237   | -1.317  | 1       |   |
| JW1190 | b1199 | ycgS / dhaL      | 15 |     | -0.054  | 0.210   | 0.000   | Invalid | 0.102   | 0.032   | 0.153   | 0.113   | 0.144   | 0.178   | 0.071   | 0.133   | 0.080   | 0.230   | 0.283   | 0.065   | 0.150   | 0.098   | 0.111   | Invalid | Invalid | -5.922  | 1       |   |
| JW1191 | b1200 | ycgT / dhaK      |    |     |         |         |         |         |         |         |         |         |         |         |         |         |         |         |         |         |         |         |         |         |         |         |         |   |

|        |       |             |    |        |        |        |        |        |        |        |        |        |        |        |        |        |        |        |        |        |        |        |        |        |        |  |   |
|--------|-------|-------------|----|--------|--------|--------|--------|--------|--------|--------|--------|--------|--------|--------|--------|--------|--------|--------|--------|--------|--------|--------|--------|--------|--------|--|---|
| JW1243 | b1251 | ycil        | 15 | 0.434  | 0.221  | 0.040  | 0.028  | -0.030 | -0.033 | 0.087  | -0.081 | 0.065  | 0.069  | 0.026  | -0.024 | 0.231  | 0.051  | 0.043  | 0.125  | 0.121  | -0.022 | 0.187  | 0.396  | 0.271  | 0.211  |  |   |
| JW1244 | b1252 | fonB        | 11 | 0.298  | 0.194  | 0.005  | -0.015 | -0.084 | 0.058  | -0.153 | -0.096 | -0.126 | 0.163  | 0.176  | -0.011 | 0.157  | 0.081  | 0.098  | 0.164  | 0.067  | -0.315 | 0.323  | 0.301  | 0.211  | -0.048 |  | 1 |
| JW1246 | b1254 | yciB        | 15 | 0.330  | 0.284  | -0.061 | 0.276  | 0.431  | 0.131  | 0.109  | 0.258  | 0.269  | 0.226  | 0.202  | 0.286  | 0.291  | 0.278  | 0.229  | 0.260  | 0.195  | 0.300  | 0.123  | 0.379  | 0.242  | 0.269  |  | 1 |
| JW1247 | b1255 | yciC        | 15 | 0.268  | 0.172  | -0.166 | -0.020 | 0.001  | 0.122  | -0.121 | -0.095 | -0.172 | 0.264  | 0.187  | 0.144  | 0.109  | 0.105  | 0.090  | 0.298  | 0.209  | -0.043 | 0.066  | 0.251  | 0.127  | -0.083 |  | 1 |
| JW1248 | b1256 | yciD / ompW | 14 | 0.449  | 0.099  | -0.233 | -0.345 | -0.960 | 0.275  | -0.223 | -1.030 | -1.063 | 0.158  | 0.128  | 0.129  | 0.001  | 0.050  | -0.035 | 0.028  | -0.050 | -1.365 | 0.073  | 0.042  | 0.059  | 0.160  |  | 1 |
| JW1249 | b1257 | yciE        | 15 | 0.309  | 0.189  | -0.064 | -1.038 | -4.641 | -0.008 | -3.722 | -4.411 | -4.252 | 0.170  | 0.155  | 0.016  | 0.051  | 0.082  | 0.069  | 0.238  | 0.083  | -4.873 | 0.098  | 0.177  | 0.066  | -3.812 |  | 1 |
| JW1250 | b1258 | yciF        | 15 | 0.346  | 0.192  | -0.143 | -1.110 | -5.545 | -0.130 | -4.687 | -5.379 | -4.931 | 0.198  | 0.188  | -0.001 | 0.186  | 0.222  | 0.245  | 0.300  | 0.177  | -5.289 | 0.026  | 0.290  | 0.272  | -4.963 |  | 1 |
| JW1252 | b1260 | trpA        | 1  | 0.012  | 0.150  | -0.137 | -0.244 | -0.480 | -0.010 | -0.336 | -0.697 | -0.616 | 0.077  | 0.076  | 0.188  | 0.035  | 0.220  | 0.146  | -0.246 | -0.229 | -0.737 | 0.126  | 0.195  | 0.140  | -0.255 |  | 1 |
| JW1253 | b1261 | trpB        | 1  | 0.105  | 0.156  | -0.074 | -0.001 | 0.051  | 0.096  | 0.089  | -0.042 | -0.089 | 0.124  | 0.074  | 0.171  | 0.091  | 0.200  | 0.107  | -0.207 | -0.100 | -0.206 | 0.128  | 0.173  | 0.017  | 0.042  |  | 1 |
| JW1254 | b1262 | trpC        | 1  | -0.230 | -0.067 | -0.167 | -0.043 | -0.016 | -0.051 | -0.111 | -0.009 | 0.031  | 0.004  | -0.055 | 0.103  | -0.063 | -0.196 | 0.011  | -0.135 | -0.062 | -0.150 | -0.056 | 0.224  | 0.028  | 0.011  |  | 1 |
| JW1255 | b1263 | trpD        | 1  | -0.119 | -0.106 | -0.172 | 0.017  | 0.018  | 0.034  | -0.154 | -0.142 | -0.137 | -0.042 | -0.024 | 0.128  | 0.007  | -0.054 | -0.012 | -0.136 | -0.113 | -0.203 | 0.040  | 0.051  | 0.012  | -0.083 |  | 1 |
| JW1256 | b1264 | trpE        | 1  | 0.067  | -0.257 | -0.120 | -0.074 | -0.085 | -0.025 | -0.142 | -0.126 | -0.171 | 0.075  | 0.087  | -0.208 | 0.043  | 0.001  | -0.064 | -0.106 | -0.050 | -0.182 | -0.031 | 0.310  | -0.292 | -0.101 |  | 1 |
| JW1258 | b1266 | yciV        | 15 | 0.277  | 0.190  | 0.006  | 0.113  | 0.235  | 0.023  | 0.102  | 0.121  | 0.142  | 0.232  | 0.161  | 0.099  | 0.168  | 0.128  | 0.118  | 0.247  | 0.203  | 0.199  | 0.185  | 0.257  | 0.186  | 0.136  |  | 1 |
| JW1259 | b1267 | yciO        | 15 | 0.314  | 0.044  | -0.306 | -0.091 | 0.158  | 0.004  | -0.089 | 0.042  | -0.043 | 0.016  | 0.126  | -0.065 | 0.033  | 0.031  | -0.069 | 0.041  | 0.071  | -0.002 | -0.007 | 0.134  | 0.145  | 0.122  |  | 1 |
| JW1260 | b1268 | yciQ        | 15 | -0.386 | -3.562 | -4.142 | -1.096 | -0.126 | 0.025  | -3.809 | -0.244 | -0.221 | 0.044  | 0.039  | -0.344 | -3.982 | -3.543 | -3.807 | -0.151 | -0.266 | -0.367 | -3.549 | -3.983 | -0.146 | -1.288 |  | 1 |
| JW1261 | b1269 | yciL        | 15 | -0.102 | -0.032 | -0.359 | -0.134 | 0.155  | 0.035  | -0.079 | 0.064  | 0.053  | 0.135  | 0.084  | -0.075 | -0.064 | -0.140 | -0.143 | 0.131  | -0.006 | -0.091 | -0.031 | 0.070  | 0.084  | -0.052 |  | 1 |
| JW1262 | b1270 | btuR        | 2  | -0.363 | 0.010  | -0.148 | -0.045 | -0.072 | -0.133 | -0.088 | 0.070  | 0.066  | 0.244  | 0.198  | 0.175  | -0.090 | -0.277 | -0.040 | 0.154  | 0.017  | -0.078 | 0.020  | 0.160  | 0.144  | 0.068  |  | 1 |
| JW1263 | b1271 | yciK        | 7  | 0.157  | 0.139  | -0.032 | 0.168  | 0.247  | -0.050 | 0.081  | 0.191  | 0.198  | 0.240  | 0.165  | 0.120  | 0.182  | 0.167  | 0.208  | 0.210  | 0.231  | 0.235  | 0.152  | 0.338  | 0.141  | 0.243  |  | 1 |
| JW1264 | b1272 | sohB        | 14 | 0.227  | 0.155  | -0.060 | 0.032  | 0.164  | 0.030  | 0.184  | 0.087  | 0.061  | 0.214  | 0.129  | -0.013 | 0.151  | 0.168  | 0.130  | 0.194  | 0.206  | 0.155  | 0.087  | 0.281  | 0.041  | 0.168  |  | 1 |
| JW1265 | b1273 | yciN        | 15 | 0.410  | 0.196  | 0.045  | 0.152  | 0.313  | 0.026  | 0.207  | 0.084  | 0.262  | 0.167  | 0.134  | -0.164 | 0.197  | 0.168  | 0.208  | 0.139  | 0.126  | 0.218  | 0.201  | 0.313  | 0.126  | 0.265  |  | 1 |
| JW1266 | b1274 | topA        | 10 | -0.088 | 0.108  | -0.112 | -0.068 | 0.021  | -0.158 | 0.010  | -0.018 | 0.144  | 0.041  | 0.078  | 0.050  | 0.047  | -0.099 | 0.186  | -0.050 | 0.020  | 0.006  | 0.059  | 0.072  | 0.112  | 0.344  |  | 1 |
| JW1267 | b1275 | cysB        | 1  | 0.009  | 0.002  | -0.251 | 0.016  | 0.253  | -0.110 | -0.093 | -0.113 | 0.291  | 0.176  | 0.092  | -0.012 | -0.108 | -0.013 | 0.044  | 0.065  | -0.102 | -0.055 | -0.044 | 0.054  | 0.106  | 0.251  |  | 1 |
| JW1268 | b1276 | acnA        | 6  | 0.280  | 0.082  | -0.179 | 0.028  | 0.232  | 0.013  | 0.053  | 0.059  | 0.107  | 0.136  | 0.121  | 0.096  | 0.134  | 0.096  | 0.100  | 0.084  | 0.135  | 0.171  | 0.057  | 0.342  | 0.156  | 0.219  |  | 1 |
| JW1269 | b1277 | ribA        | 2  | 0.308  | 0.271  | 0.018  | 0.134  | 0.305  | -0.066 | 0.132  | 0.136  | 0.169  | 0.195  | 0.157  | 0.139  | 0.289  | 0.240  | 0.273  | 0.253  | 0.201  | 0.205  | 0.194  | 0.355  | 0.198  | 0.298  |  | 1 |
| JW1270 | b1278 | pgpB        | 7  | 0.387  | 0.230  | -0.030 | 0.152  | 0.365  | 0.014  | 0.160  | 0.179  | 0.223  | 0.118  | 0.110  | 0.041  | 0.184  | 0.240  | 0.209  | 0.265  | 0.179  | 0.220  | 0.200  | 0.041  | 0.174  | 0.250  |  | 1 |
| JW1271 | b1279 | yciS        | 15 | 0.136  | 0.148  | -0.107 | -0.026 | -0.011 | 0.044  | 0.145  | -0.083 | -0.026 | -0.161 | 0.108  | -0.024 | -0.091 | -0.116 | -0.102 | -0.029 | -0.052 | -0.161 | 0.040  | 0.079  | -0.069 | -0.200 |  | 1 |
| JW1272 | b1280 | yciM        | 15 | 0.329  | 0.049  | -0.150 | -0.120 | 0.037  | 0.082  | 0.039  | -0.026 | -0.078 | 0.121  | 0.115  | -0.022 | 0.091  | 0.079  | 0.070  | -0.076 | -0.106 | -0.126 | -0.028 | 0.119  | -0.031 | 0.083  |  | 1 |
| JW1273 | b1281 | pyrF        | 8  | 0.033  | 0.070  | -0.129 | -0.048 | 0.143  | -0.110 | 0.055  | -0.012 | 0.195  | 0.038  | 0.090  | 0.163  | 0.074  | -0.056 | 0.247  | 0.002  | -0.095 | 0.079  | 0.127  | 0.074  | 0.070  | 0.293  |  | 1 |
| JW1274 | b1282 | yciH        | 15 | 0.298  | 0.232  | -0.004 | -0.005 | 0.099  | 0.001  | 0.118  | -0.154 | 0.003  | 0.053  | 0.114  | 0.147  | 0.184  | 0.184  | 0.162  | -0.298 | -0.009 | -0.079 | 0.127  | 0.035  | -0.010 | 0.278  |  | 1 |
| JW1275 | b1283 | osmB        | 4  | 0.024  | 0.119  | -0.168 | -0.350 | -0.417 | -0.045 | 0.175  | -0.114 | -0.493 | 0.111  | -0.011 | -0.057 | 0.125  | 0.130  | 0.162  | -0.112 | 0.019  | 0.117  | 0.045  | 0.253  | 0.265  | 0.315  |  | 1 |
| JW1276 | b1284 | yciT        | 15 | 0.100  | -0.023 | -0.329 | -0.124 | 0.284  | 0.021  | 0.000  | 0.162  | 0.188  | 0.116  | 0.124  | -0.029 | -0.001 | -0.038 | -0.033 | 0.106  | 0.100  | 0.072  | 0.009  | 0.150  | 0.003  | 0.058  |  | 1 |
| JW1278 | b1285 | yciR        | 15 | -0.245 | 0.119  | -0.039 | 0.040  | 0.102  | -0.145 | 0.078  | 0.102  | 0.181  | 0.189  | 0.203  | 0.042  | 0.048  | -0.048 | 0.200  | 0.092  | 0.094  | 0.018  | 0.137  | 0.211  | 0.032  | 0.205  |  | 1 |
| JW1279 | b1286 | rnb         | 8  | 0.235  | 0.151  | 0.051  | 0.209  | 0.326  | -0.043 | 0.067  | 0.210  | 0.240  | 0.218  | 0.187  | 0.109  | 0.115  | 0.118  | 0.144  | 0.150  | 0.174  | 0.212  | 0.266  | 0.247  | 0.092  | 0.097  |  | 1 |
| JW1280 | b1287 | yciW        | 15 | 0.360  | -0.170 | -0.383 | -0.114 | 0.075  | -0.058 | -0.217 | -0.148 | -0.014 | 0.147  | 0.109  | 0.102  | -0.019 | -0.084 | -0.138 | -0.053 | -0.043 | -0.081 | -0.153 | 0.126  | -0.017 | -0.078 |  | 1 |
| JW1281 | b1288 | envM / fabI | 7  | 0.411  | 0.123  | -0.078 | 0.081  | 0.297  | -0.006 | 0.135  | 0.080  | 0.196  | 0.188  | 0.152  | 0.077  | 0.166  | 0.218  | 0.166  | 0.268  | 0.267  | 0.193  | 0.142  | 0.302  | 0.124  | 0.156  |  | 1 |
| JW1282 | b1289 | yciD        | 15 | -3.496 | -0.303 | -0.570 | -1.334 | -4.005 | 0.034  | -0.254 | -3.813 | -3.534 | 0.115  | 0.050  | -0.257 | -0.204 | -0.260 | -0.281 | -4.013 | -4.056 | -4.186 | -0.400 | 0.031  | -0.147 | -0.175 |  | 1 |
| JW1283 | b1290 | sapF        | 4  | 0.288  | 0.152  | -0.042 | 0.046  | 0.176  | -0.081 | 0.171  | -0.030 | 0.165  | 0.180  | 0.124  | -0.060 | 0.189  | 0.162  | 0.180  | 0.124  | 0.095  | 0.067  | 0.187  | 0.228  | 0.086  | 0.118  |  | 1 |
| JW1284 | b1291 | sapD        | 11 | -0.047 | 0.126  | -0.022 | -0.099 | 0.113  | -0.124 | 0.041  | -0.075 | 0.147  | 0.070  | 0.079  | 0.120  | 0.051  | -0.181 | 0.199  | -0.118 | -0.041 | 0.020  | 0.203  | 0.156  | -0.025 | 0.235  |  | 1 |
| JW1285 | b1292 | sapC        | 11 | 0.172  | 0.093  | -0.153 | -0.072 | 0.209  | 0.028  | 0.125  | 0.042  | 0.061  | 0.093  | 0.072  | -0.092 | 0.111  | 0.093  | 0.084  | 0.035  | 0.122  | -0.005 | 0.177  | 0.330  | -0.115 | 0.185  |  | 1 |
| JW1286 | b1293 | sapB        | 11 | 0.003  | 0.094  | -0.002 | 0.054  | 0.222  | -0.153 | 0.067  | 0.050  | 0.283  | 0.166  | 0.122  | 0.134  | 0.087  | -0.057 | 0.195  | 0.047  | 0.182  | 0.131  | 0.161  | 0.215  | 0.202  | 0.265  |  | 1 |
| JW1287 | b1294 | sapA        | 11 | 0.329  | 0.125  | 0.070  | 0.061  | 0.090  | -0.092 | 0.036  | -0.022 | 0.048  | 0.133  | 0.102  | 0.090  | 0.200  | 0.134  | 0.184  | -0.096 | 0.024  | -0.045 | 0.289  | 0.281  | 0.019  | 0.136  |  | 1 |
| JW1288 | b1295 | ymjA        | 15 | 0.331  | 0.232  | 0.019  | 0.066  | 0.196  | -0.053 | 0.109  | 0.250  | 0.116  | 0.162  | 0.126  | 0.185  | 0.248  | 0.274  | 0.241  | 0.232  | 0.102  | 0.280  | 0.212  | 0.327  | 0.134  | 0.227  |  | 1 |
| JW1289 | b1296 | yjeE        | 11 | 0.037  | -0.162 | -0.377 | -1.216 | -4.022 | 0.069  | -0.150 | -3.845 | -3.845 | 0.197  | 0.108  | -0.637 | -0.101 | -0.024 | -0.152 | -4.067 | -3.829 | -4.280 | -0.146 | 0.027  | 0.118  | -0.101 |  | 1 |
| JW1290 | b1297 | yciK        | 1  | 0.418  | -0.027 | -0.210 | -1.210 | -8.267 | -0.070 | -0.024 | -7.910 | -7.410 | 0.155  | 0.106  | -0.257 | 0.042  | -0.012 | 0.000  | -7.687 | -7.079 | -7.774 | 0.096  | 0.233  | 0.022  | -0.008 |  | 1 |
| JW1291 | b1298 | yciL        | 15 | 0.152  | 0.040  | -0.173 | -1.155 | -4.942 | -0.140 | 0.027  | -4.649 | -4.605 | 0.169  | 0.079  | -0.108 | 0.046  | 0.006  | 0.087  | -4.977 | -4.689 | -4.968 | 0.109  | 0.240  | -0.044 | 0.056  |  | 1 |
| JW1292 | b1299 | yciC        | 15 | 0.259  | 0.116  | -0.083 | -1.159 | -5.466 | -0.157 | 0.038  | -5.834 | -5.422 | 0.067  | 0.038  | -0.003 | 0.096  | 0.105  | -0.001 | -5.754 | -5.841 | -5.976 | 0.216  | 0.200  | 0.211  | 0.138  |  | 1 |



|        |       |            |    |        |        |        |        |        |        |        |        |        |        |        |        |        |        |        |        |        |        |        |        |        |        |   |
|--------|-------|------------|----|--------|--------|--------|--------|--------|--------|--------|--------|--------|--------|--------|--------|--------|--------|--------|--------|--------|--------|--------|--------|--------|--------|---|
| JW1444 | b1449 | yncB       | 6  | 0.131  | -0.364 | -0.549 | -1.305 | -4.446 | -0.092 | -0.294 | -4.338 | -6.082 | -0.236 | -0.254 | -0.156 | -0.292 | -6.098 | -0.998 | -4.360 | -4.413 | -4.354 | -0.297 | -0.154 | -0.330 | -0.262 | 1 |
| JW1445 | b1450 | yncC       | 15 | 0.097  | -0.010 | -0.218 | -0.810 | -2.244 | -0.080 | -0.035 | -2.211 | -3.205 | 0.090  | -0.009 | 0.046  | -0.067 | -2.322 | 0.049  | -2.190 | -2.100 | -2.343 | -0.058 | -0.147 | -0.016 | 0.055  | 1 |
| JW1446 | b1451 | yncD       | 15 | 0.175  | -0.027 | -0.164 | -0.217 | -0.344 | 0.066  | 0.082  | -0.290 | -3.630 | 0.124  | 0.070  | -0.178 | -0.095 | -6.075 | -0.108 | -0.089 | -0.140 | -0.400 | 0.062  | -6.350 | -0.207 | 0.007  | 1 |
| JW1447 | b1452 | 274#5      | 15 | 0.268  | 0.047  | -0.020 | 0.101  | 0.317  | 0.073  | 0.164  | 0.121  | -3.109 | 0.145  | 0.051  | -0.135 | 0.127  | -5.788 | 0.093  | 0.165  | 0.142  | 0.085  | 0.180  | -6.829 | 0.023  | -0.098 | 1 |
| JW1448 | b1453 | ansP       | 11 | 0.268  | 0.015  | -0.253 | -0.308 | -0.373 | 0.194  | 0.033  | -0.800 | -3.765 | 0.294  | 0.127  | 0.101  | 0.117  | -2.137 | 0.196  | -0.282 | -0.215 | -0.360 | -0.074 | -7.610 | 0.172  | 0.103  | 1 |
| JW1449 | b1454 | 275#2      | 15 | 0.209  | -0.409 | -0.300 | -1.257 | -5.977 | -0.086 | 0.150  | -5.775 | -6.044 | 0.193  | 0.146  | -0.276 | 0.081  | -5.655 | 0.109  | -0.519 | -0.580 | -0.710 | -0.021 | -6.515 | -0.124 | 0.042  | 1 |
| JW1452 | b1457 | ycdC       | 15 | 0.196  | 0.128  | -0.081 | -1.294 | -5.228 | -0.175 | -0.305 | -5.809 | -5.327 | -0.028 | 0.134  | -0.052 | -4.792 | -5.008 | -4.409 | -5.308 | -5.135 | -5.739 | -0.048 | -6.195 | -4.476 | -4.872 | 1 |
| JW1453 | b1458 | (yhh1)     | 15 | 0.302  | 0.221  | 0.122  | -1.126 | -6.046 | -0.127 | 0.051  | -6.138 | -6.512 | 0.216  | 0.153  | 0.019  | -4.850 | -5.098 | -4.684 | -5.627 | -5.219 | -5.642 | 0.152  | -6.794 | -4.530 | -4.689 | 1 |
| JW1455 | b1460 | ycdC       | 15 | 0.376  | 0.244  | -0.145 | -1.197 | -2.157 | 0.752  | -0.015 | -7.114 | -6.356 | 0.590  | 0.377  | 0.718  | 0.252  | -0.041 | 0.553  | -1.246 | -0.595 | -1.449 | -0.170 | -6.903 | 0.610  | 0.261  | 1 |
| JW1456 | b1461 | ycdE       | 15 | 0.336  | 0.108  | 0.081  | -0.192 | -0.470 | -0.099 | 0.208  | -3.439 | -2.923 | 0.270  | 0.095  | 0.019  | -0.269 | -3.242 | -0.363 | -3.235 | -3.030 | -0.282 | 0.117  | -4.038 | -0.415 | -0.401 | 1 |
| JW1457 | b1462 | ycdH       | 15 | 0.289  | -0.486 | -0.670 | -0.474 | -0.336 | 0.019  | -0.457 | -0.498 | -3.228 | 0.126  | 0.108  | -0.745 | -0.231 | -4.946 | -0.266 | -0.302 | -0.423 | -0.752 | -0.440 | -6.701 | -0.514 | -0.476 | 1 |
| JW1458 | b1463 | rhoA       | 14 | 0.119  | -0.076 | -0.210 | -0.117 | 0.072  | -0.105 | -0.015 | -0.127 | -3.118 | -0.139 | -0.157 | 0.030  | -0.083 | -5.643 | 0.082  | -0.136 | -0.168 | -0.173 | -0.011 | -7.192 | -0.249 | -0.083 | 1 |
| JW1459 | b1464 | ycdE       | 15 | 0.138  | -0.220 | -0.391 | -0.461 | -0.408 | -0.079 | -0.230 | -0.209 | -3.511 | -0.337 | -0.368 | -0.066 | -0.126 | -5.811 | -0.098 | -0.560 | -0.464 | -0.613 | -0.205 | -6.865 | -0.333 | -0.293 | 1 |
| JW1460 | b1465 | narV       | 6  | 0.135  | -0.060 | -0.249 | -0.663 | -1.362 | -0.025 | 0.006  | -1.508 | -2.900 | 0.141  | 0.018  | -0.182 | -0.078 | -2.487 | -0.132 | -1.317 | -1.198 | -1.400 | -0.045 | -3.324 | -0.118 | 0.062  | 1 |
| JW1461 | b1466 | narW       | 6  | 0.154  | -0.099 | -0.078 | -0.290 | -0.328 | -0.046 | -0.019 | -0.466 | -2.121 | -0.098 | -0.144 | -0.302 | -0.193 | -1.741 | -0.230 | -0.500 | -0.480 | -0.554 | -0.019 | -2.295 | -0.201 | -0.240 | 1 |
| JW1462 | b1467 | narY       | 6  | 0.019  | -0.229 | -0.350 | -0.190 | -0.320 | 0.011  | -0.209 | -0.327 | -2.794 | 0.079  | 0.048  | 0.033  | -0.110 | -4.120 | -0.258 | -0.375 | -0.315 | -0.384 | -0.110 | -0.877 | -0.406 | -0.321 | 1 |
| JW1463 | b1468 | narZ       | 6  | 0.084  | 0.158  | -0.155 | -0.066 | 0.058  | 0.057  | 0.162  | -0.075 | -2.601 | 0.009  | -0.149 | -0.258 | 0.154  | -3.704 | 0.038  | -0.158 | 0.016  | -0.231 | 0.284  | 0.146  | -0.149 | -0.038 | 1 |
| JW1464 | b1469 | narU       | 11 | 0.080  | 0.075  | -0.220 | -0.114 | 0.057  | -0.011 | 0.149  | 0.022  | -3.117 | 0.005  | 0.047  | -0.139 | 0.061  | -5.535 | -0.247 | 0.143  | -0.082 | 0.011  | -0.075 | 0.106  | -0.126 | 0.115  | 1 |
| JW1466 | b1470 | yddJ       | 15 | -0.386 | 0.105  | -0.196 | -1.325 | -5.746 | -0.209 | 0.186  | -5.707 | -6.559 | 0.029  | 0.117  | -0.268 | 0.034  | -7.054 | -0.904 | -4.328 | -3.846 | -4.148 | -0.054 | -0.040 | 0.101  | 0.062  | 1 |
| JW1467 | b1471 | yddK       | 15 | -0.485 | 0.022  | -0.151 | -1.239 | -5.919 | -0.219 | 0.198  | -6.173 | -6.227 | 0.144  | 0.206  | 0.046  | -0.080 | -5.949 | 0.101  | -5.698 | -5.301 | -5.737 | 0.061  | 0.320  | -0.148 | 0.166  | 1 |
| JW1468 | b1472 | 277#2      | 15 | 0.521  | 0.180  | 0.034  | -1.063 | -3.781 | -0.113 | 0.131  | -3.913 | -4.039 | 0.163  | 0.059  | 0.098  | 0.150  | -3.929 | 0.147  | -3.475 | -2.366 | -4.000 | 0.134  | 0.445  | 0.322  | 0.351  | 1 |
| JW1469 | b1473 | yddG       | 15 | 0.156  | -0.163 | -0.428 | -0.386 | -0.372 | -0.046 | -0.172 | -0.415 | -3.509 | 0.221  | 0.100  | 0.117  | -1.750 | -5.642 | -0.325 | -0.369 | -0.364 | -0.412 | -0.267 | -0.120 | -0.262 | -0.258 | 1 |
| JW1470 | b1474 | fdnG       | 6  | 0.172  | 0.072  | -0.108 | 0.081  | 0.187  | -0.023 | 0.029  | 0.108  | -2.421 | 0.170  | 0.085  | -0.139 | -3.576 | -3.333 | 0.047  | 0.139  | -0.045 | -0.038 | 0.047  | 0.173  | -0.089 | -0.106 | 1 |
| JW1471 | b1475 | fdnH       | 6  | 0.369  | 0.140  | 0.038  | 0.220  | 0.361  | 0.053  | 0.164  | 0.241  | -2.484 | 0.088  | -0.108 | -0.085 | -3.480 | -3.396 | 0.039  | 0.267  | 0.183  | 0.158  | 0.209  | 0.165  | 0.076  | 0.064  | 1 |
| JW1472 | b1476 | fdnI       | 6  | 0.313  | 0.022  | -0.060 | 0.253  | 0.128  | 0.063  | 0.107  | 0.039  | -2.988 | 0.070  | 0.031  | -0.279 | -5.270 | -4.655 | 0.062  | 0.036  | -0.082 | -0.085 | 0.045  | 0.005  | 0.086  | -0.138 | 1 |
| JW1473 | b1477 | yddM       | 15 | 0.191  | -0.262 | -0.411 | -0.443 | -0.538 | -0.090 | -0.023 | -0.466 | -3.051 | 0.052  | 0.073  | -0.752 | -4.550 | -4.077 | -0.069 | -0.263 | -0.558 | -0.516 | -0.249 | 0.045  | -0.100 | -0.072 | 1 |
| JW1474 | b1478 | adhP       | 5  | -0.337 | -0.270 | -0.406 | -0.323 | -0.365 | -0.124 | -0.336 | -0.339 | -3.386 | 0.207  | 0.140  | -0.323 | -6.791 | -5.828 | -0.176 | -0.347 | -0.397 | -0.401 | -0.306 | -0.087 | -0.058 | -0.164 | 1 |
| JW1475 | b1479 | sfcA       | 6  | 0.056  | -0.009 | -0.140 | 0.115  | 0.137  | -0.023 | -0.075 | 0.028  | -2.048 | 0.186  | 0.138  | 0.037  | -2.744 | -2.621 | 0.080  | -0.031 | -0.053 | 0.021  | -0.009 | 0.238  | -0.072 | 0.081  | 1 |
| JW1476 | b1481 | yddX       | 15 | 0.357  | 0.211  | -0.015 | 0.116  | 0.291  | -0.086 | 0.176  | 0.175  | -2.613 | 0.238  | 0.047  | 0.104  | -4.318 | -3.670 | 0.167  | 0.322  | 0.264  | 0.299  | 0.118  | -3.498 | 0.091  | 0.191  | 1 |
| JW1477 | b1482 | osmC       | 4  | 0.313  | -0.133 | -0.163 | 0.059  | 0.162  | 0.055  | 0.001  | 0.049  | -3.034 | 0.038  | 0.065  | -0.099 | -5.267 | -0.304 | -0.417 | 0.028  | -0.087 | -0.049 | -0.015 | 0.078  | -0.080 | -0.167 | 1 |
| JW1478 | b1483 | yddO       | 11 | -0.019 | -0.111 | -0.130 | -0.774 | -3.016 | 0.063  | 0.044  | -2.643 | -3.077 | -0.001 | -0.015 | -0.162 | -2.992 | 0.119  | 0.077  | -3.220 | -2.948 | -3.164 | -0.052 | -0.086 | -0.037 | -0.012 | 1 |
| JW1479 | b1484 | yddP       | 11 | 0.103  | 0.002  | -0.155 | -1.059 | -5.844 | 0.186  | 0.045  | -5.454 | -6.001 | 0.147  | 0.064  | -0.264 | -5.837 | 0.057  | 0.035  | -5.618 | -5.330 | -5.710 | -0.035 | 0.127  | -0.234 | -0.029 | 1 |
| JW1480 | b1485 | yddQ       | 11 | -0.065 | -0.175 | -0.349 | -1.307 | -6.651 | -0.076 | -0.170 | -6.833 | -6.488 | -0.069 | 0.020  | -0.216 | -0.376 | -0.323 | -0.051 | -6.712 | -6.439 | -7.130 | -0.149 | 0.038  | -1.334 | -0.036 | 1 |
| JW1481 | b1486 | yddR       | 11 | 0.109  | 0.110  | -0.123 | -1.029 | -6.336 | -0.919 | 0.086  | -6.542 | -6.260 | 0.090  | 0.012  | 0.042  | 0.011  | 0.084  | 0.142  | -6.376 | -6.173 | -6.600 | 0.160  | -5.253 | 0.140  | 0.118  | 1 |
| JW1482 | b1487 | yddS       | 15 | 0.190  | 0.114  | -0.292 | -1.084 | -6.249 | 0.108  | -0.033 | -6.609 | -6.949 | 0.076  | 0.043  | 0.059  | 0.087  | 0.157  | 0.116  | -6.253 | -5.912 | -6.232 | -0.017 | -6.123 | -0.097 | 0.094  | 1 |
| JW1483 | b1488 | 280#1      | 15 | 0.343  | 0.147  | -0.204 | -1.053 | -4.693 | 0.039  | 0.027  | -4.651 | -5.680 | -0.003 | 0.043  | -0.076 | 0.020  | 0.149  | 0.086  | -5.037 | -5.365 | -5.325 | 0.046  | -1.366 | -0.123 | 0.049  | 1 |
| JW1484 | b1489 | dos / yddU | 14 | 0.053  | -0.048 | -0.293 | -0.072 | 0.113  | 0.167  | 0.063  | 0.073  | -2.941 | 0.066  | -0.857 | -0.048 | 0.014  | 0.122  | -0.017 | -0.018 | -0.123 | -0.065 | -0.166 | -2.129 | -0.003 | 0.002  | 1 |
| JW1485 | b1490 | 280#3      | 15 | 0.172  | 0.059  | -0.265 | -0.824 | -2.789 | 0.151  | 0.113  | -2.790 | -5.484 | -0.013 | -0.061 | -0.143 | 0.024  | 0.118  | 0.048  | -3.013 | -2.935 | -2.989 | 0.007  | -0.352 | 0.094  | 0.126  | 1 |
| JW1486 | b1491 | 280#4      | 15 | -0.226 | 0.062  | -0.118 | 0.158  | 0.062  | -0.004 | 0.045  | 0.000  | -3.226 | 0.209  | 0.244  | 0.049  | 0.087  | 0.083  | 0.230  | -0.009 | -0.175 | -0.174 | 0.103  | 0.157  | 0.030  | 0.086  | 1 |
| JW1487 | b1492 | xasA       | 11 | 0.078  | 0.126  | -0.130 | 0.269  | 0.377  | 0.236  | 0.030  | 0.398  | -2.189 | 0.102  | 0.083  | 0.122  | 0.117  | 0.279  | 0.245  | 0.251  | 0.136  | 0.148  | -0.009 | 0.245  | 0.168  | 0.188  | 1 |
| JW1488 | b1493 | gadB       | 5  | 0.126  | 0.157  | 0.100  | 0.253  | 0.257  | 0.197  | 0.132  | 0.416  | -1.077 | 0.087  | 0.061  | -0.089 | -0.406 | -0.329 | -0.348 | 0.200  | 0.008  | 0.090  | 0.155  | 0.141  | -0.266 | 0.075  | 1 |
| JW1489 | b1494 | pqqL       | 14 | 0.272  | 0.122  | -0.033 | 0.536  | 0.595  | 0.314  | 0.133  | 0.517  | -3.130 | 0.208  | 0.153  | -6.079 | -6.451 | -6.064 | -6.221 | 0.283  | -5.326 | -6.010 | 0.079  | 0.268  | 0.096  | 0.140  | 1 |
| JW1490 | b1495 | yddB       | 11 | 0.209  | -0.012 | -0.244 | 0.341  | 0.552  | 0.298  | 0.012  | 0.425  | -3.184 | 0.127  | 0.095  | -5.944 | -6.683 | -6.215 | -6.681 | 0.264  | -5.801 | -6.214 | -0.085 | 0.129  | -5.054 | 0.133  | 1 |
| JW1491 | b1496 | yddA       | 15 | 0.237  | 0.134  | -0.188 | -0.199 | 0.347  | 0.265  | 0.114  | 0.249  | -3.057 | 0.173  | 0.131  | -5.222 | -6.736 | -6.330 | -6.278 | 0.176  | -5.891 | -6.406 | -0.131 | 0.174  | -4.794 | 0.034  | 1 |
| JW1492 | b1497 | chuR       | 5  | 0.222  | 0.085  | -0.099 | 0.242  | 0.451  | -1.126 | 0.181  | 0.313  | -2.962 | 0.179  | 0.139  | -0.176 | -6.179 | -5.733 | -5.836 | 0.326  | 0.034  | 0.215  | 0.089  | 0.208  | -1.957 | 0.121  | 1 |
| JW1493 | b1498 | 301#2      | 15 | -0.167 | 0.067  | -0.210 | 0.065  | 0.216  | -0.197 | 0.026  | 0.159  | -3.261 | 0.125  | 0.104  | 0.010  | -6.903 | -7.054 | -6.385 | 0.104  | -0.148 | 0.075  | 0.054  | 0.179  | 0.009  | 0.185  | 1 |
| JW1494 | b1499 | ydeO       | 15 | 0.165  | 0.020  | -0.308 | 0.034  | 0.316  | 0.043  | 0.078  | 0.156  | -3.015 | 0.115  | 0.118  | -0.006 | -0.109 | 0.060  | 0.039  |        |        |        |        |        |        |        |   |



|        |       |            |    |     |        |        |        |        |        |        |        |        |        |        |        |        |        |        |        |        |        |        |        |        |        |        |        |   |
|--------|-------|------------|----|-----|--------|--------|--------|--------|--------|--------|--------|--------|--------|--------|--------|--------|--------|--------|--------|--------|--------|--------|--------|--------|--------|--------|--------|---|
| JW1538 | b1545 | tnpR       | 14 | Qin | -3.435 | -0.687 | -2.258 | -2.640 | -5.238 | -0.695 | -1.709 | -3.429 | -5.049 | -3.567 | -3.240 | -0.969 | -5.959 | -5.798 | -4.184 | -5.247 | -4.043 | -5.450 | -1.980 | -5.966 | -0.694 | -3.333 | 1      |   |
| JW1539 | b1546 | lyfM       | 15 | Qin | -0.372 | 0.036  | -1.559 | -1.207 | -2.808 | 0.756  | -0.370 | -0.366 | -2.677 | -0.867 | -0.499 | -1.342 | -4.546 | -4.594 | -1.704 | -2.578 | -1.370 | -2.917 | -1.368 | -4.364 | -0.020 | -0.356 | 1      |   |
| JW1540 | b1547 | Y314_LAMBD | 15 | Qin | -1.772 | -0.105 | -1.940 | -2.397 | -5.247 | 0.762  | -0.173 | -0.363 | -4.686 | -0.479 | -0.223 | -1.128 | -5.194 | -3.980 | -0.773 | -5.314 | -1.641 | -5.292 | -1.815 | -5.369 | -0.327 | -0.268 | 1      |   |
| JW1541 | b1548 | noxA       | 9  | Qin | -0.227 | 1.088  | -1.009 | -1.924 | -4.901 | 0.072  | -0.894 | 0.817  | -0.525 | -0.347 | -1.121 | -4.554 | -5.394 | -4.898 | -5.063 | -0.868 | -0.881 | -0.889 | -0.912 | -5.714 | -0.936 | 0.281  | 1      |   |
| JW1542 | b1549 | yfO        | 15 | Qin | -2.722 | -1.715 | -2.912 | -2.619 | -4.826 | -0.213 | -2.274 | -4.507 | -4.025 | -4.919 | -2.413 | -1.963 | -5.200 | -5.102 | -4.782 | -4.977 | -5.090 | -5.440 | -2.414 | -5.327 | -3.724 | -2.540 | 1      |   |
| JW1544 | b1552 | cspl       | 14 | Qin | -2.266 | 0.214  | -3.258 | -3.120 | -3.155 | 0.086  | -2.608 | -2.790 | -3.113 | -2.946 | -2.800 | -0.040 | -3.305 | -3.791 | -3.211 | -3.184 | -3.258 | -3.297 | -2.056 | -4.169 | -1.155 | -3.160 | 1      |   |
| JW1545 | b1553 | loc#2      | 15 | Qin | -1.266 | 0.560  | -1.944 | -2.344 | -2.873 | 0.373  | -1.753 | -0.540 | -2.911 | -4.867 | -2.266 | 0.327  | -1.771 | -1.441 | -2.488 | -2.577 | -2.469 | -2.661 | -1.522 | -2.614 | -0.355 | -5.571 | 1      |   |
| JW1546 | b1554 | ybcY       | 15 | Qin | 0.430  | 1.046  | -0.133 | -0.351 | -1.111 | 0.833  | -0.062 | 1.246  | -1.175 | -2.690 | -0.534 | 0.876  | 0.197  | 0.265  | -0.688 | -0.529 | -0.650 | -0.674 | 0.115  | -0.633 | 0.297  | -3.314 | 1      |   |
| JW1547 | b1555 | yfjR       | 15 | Qin | -4.064 | 0.190  | -2.090 | -2.230 | -3.815 | 0.332  | -1.645 | -1.779 | -3.206 | -4.031 | -2.356 | 0.167  | -2.759 | -2.981 | -2.865 | -2.519 | -2.583 | -2.743 | -2.015 | -5.131 | -1.507 | -2.424 | 1      |   |
| JW1548 | b1556 | (ydyS)     | 15 | Qin | -2.575 | 0.269  | -1.738 | -1.828 | -2.038 | 0.045  | -1.434 | -1.678 | -1.489 | -1.991 | -1.870 | -1.045 | -3.705 | -3.690 | -3.402 | -2.378 | -2.433 | -2.495 | -0.822 | -4.213 | -2.248 | -1.589 | 1      |   |
| JW1549 | b1557 | cspB       | 14 | Qin | -2.884 | 0.122  | -3.445 | -3.084 | -2.690 | 0.163  | -2.500 | -2.798 | -2.671 | -2.885 | -2.819 | 0.080  | -3.215 | -3.335 | -3.054 | -2.909 | -2.964 | -3.362 | -2.594 | -3.502 | -3.051 | -2.994 | 1      |   |
| JW1550 | b1558 | cspF       | 14 | Qin | -3.129 | 0.191  | -4.000 | -3.211 | -2.940 | 0.155  | -2.967 | -2.686 | -2.687 | -3.187 | -3.185 | -1.548 | -3.279 | -3.176 | -3.319 | -3.089 | -3.387 | -3.562 | -2.988 | -3.817 | -3.874 | -3.667 | 1      |   |
| JW1551 | b1559 | regQ_LAMBD | 15 | Qin | -2.396 | 0.319  | -2.899 | -3.017 | -1.009 | 0.326  | -1.056 | -0.432 | -0.555 | -1.053 | -3.169 | 0.377  | -2.691 | -2.469 | -3.188 | -3.375 | -3.343 | -3.514 | -1.211 | -3.306 | -1.849 | -6.108 | 1      |   |
| JW1552 | b1560 | 309#4      | 15 | Qin | -0.396 | 0.964  | -0.942 | -0.733 | -0.453 | 0.758  | -0.699 | -0.378 | 0.121  | -1.043 | -1.565 | 0.207  | -1.549 | -1.517 | -1.196 | -3.472 | -3.447 | -5.509 | -0.172 | -1.230 | -0.809 | -1.846 | 1      |   |
| JW1553 | b1561 | rem        | 15 | Qin | -3.368 | 0.222  | -0.494 | 0.032  | 0.273  | 0.292  | -0.097 | 0.113  | -3.121 | -3.999 | -3.935 | -0.257 | -3.784 | -3.671 | -3.397 | -4.562 | -4.956 | -4.912 | -3.623 | -0.358 | -0.419 | -3.578 | 1      |   |
| JW1555 | b1563 | reIE       | 15 | Qin | -3.539 | 0.224  | -4.328 | -4.102 | -3.580 | 0.179  | -3.208 | -3.386 | -3.328 | -3.953 | -3.769 | -3.365 | -4.304 | -3.937 | -3.794 | -4.567 | -4.921 | -5.042 | -3.437 | 0.291  | 0.251  | -3.971 | 1      |   |
| JW1556 | b1564 | reIB       | 9  | Qin | -4.001 | 0.191  | -4.798 | -4.527 | -3.960 | 0.193  | -3.489 | -3.807 | -3.703 | -4.245 | -3.949 | -3.700 | -4.366 | -4.046 | -4.090 | -4.508 | -4.880 | -4.936 | -3.711 | 0.324  | 0.200  | -4.413 | 1      |   |
| JW1557 | b1565 | yfjV       | 15 | Qin | -4.954 | 0.153  | -5.248 | -4.891 | -4.662 | 0.107  | -4.232 | -4.660 | -4.084 | -4.652 | -4.571 | -4.103 | -4.849 | -4.703 | -4.384 | -4.832 | -5.606 | -5.518 | -4.304 | -0.048 | -1.327 | -5.073 | 1      |   |
| JW1558 | b1566 | fixA       | 15 | Qin | -3.593 | 0.163  | -2.081 | -2.740 | -3.414 | -0.433 | -2.190 | -2.251 | -3.436 | -5.211 | -5.337 | -2.649 | -5.215 | -5.198 | -4.833 | -5.578 | -6.041 | -6.164 | -3.521 | -4.947 | -4.798 | -5.555 | 1      |   |
| JW1560 | b1568 | yfjX       | 15 | Qin | -0.961 | 0.607  | 0.360  | -0.119 | -0.877 | -3.228 | 0.545  | 0.828  | -0.946 | -4.279 | -4.416 | 0.006  | -4.558 | -4.358 | -4.251 | -4.724 | -5.101 | -4.834 | -1.337 | -4.617 | -4.182 | -4.279 | 1      |   |
| JW1561 | b1569 | dicC       | 4  | Qin | -1.569 | -0.292 | 0.354  | -0.171 | -1.277 | -3.366 | 0.460  | 0.146  | -1.505 | -3.939 | -3.842 | -0.683 | -2.937 | -2.983 | -3.091 | -4.167 | -3.910 | -4.761 | -1.780 | -3.571 | -3.217 | -3.115 | 1      |   |
| JW1562 | b1570 | dicA       | 4  | Qin | -2.634 | -2.165 | -0.096 | -0.850 | -3.804 | -2.747 | 0.107  | -1.940 | -2.716 | -4.197 | -4.217 | -3.027 | -3.265 | -2.888 | -2.629 | -6.167 | -6.484 | -6.660 | -2.210 | -4.496 | -3.445 | -3.784 | 1      |   |
| JW1565 | b1573 | yfjC       | 15 | Qin | 0.731  | 0.687  | 1.350  | 1.041  | 0.357  | 1.530  | 0.824  | 2.165  | 0.092  | -3.675 | -3.511 | -1.772 | -2.146 | -2.238 | 0.167  | -4.291 | -4.954 | -5.030 | 1.866  | -3.915 | 0.206  | -4.616 | 1      |   |
| JW1568 | b1577 | y0E        | 15 | Qin | 0.215  | 0.710  | 0.825  | 0.713  | 0.316  | 0.077  | 0.196  | 1.451  | 0.695  | -0.176 | -0.883 | 0.647  | -0.665 | -1.992 | -2.002 | -2.094 | -3.176 | -3.372 | 0.265  | -0.435 | -1.102 | -0.750 | 1      |   |
| JW1571 | b1579 | 309#17.2   | 15 | Qin | -0.411 | 0.101  | -0.631 | -3.915 | -4.028 | -0.052 | -3.575 | -3.485 | -3.728 | -3.710 | -3.736 | 0.085  | -3.544 | -3.560 | -3.598 | -4.034 | -4.040 | -4.346 | -1.122 | -3.626 | -1.390 | -4.867 | 1      |   |
| JW1572 | b1580 | rspB       | 14 | Qin | -1.937 | 0.018  | -0.831 | -0.509 | -0.515 | 0.027  | -0.562 | -0.506 | -0.677 | -0.585 | -0.644 | 0.077  | -0.558 | -0.623 | -0.569 | -0.604 | -0.816 | -3.055 | -0.340 | -3.016 | -0.423 | -5.689 | 1      |   |
| JW1573 | b1581 | rspA       | 14 | Qin | -1.761 | 0.103  | -0.143 | 0.230  | 0.389  | -0.010 | 0.116  | -0.070 | 0.194  | 0.138  | 0.011  | 0.029  | 0.194  | 0.209  | 0.185  | 0.337  | -0.192 | -0.169 | 0.018  | 0.207  | -0.158 | -2.294 | 1      |   |
| JW1574 | b1582 | ynfA       | 15 | Qin | -0.061 | 0.093  | -0.182 | -0.018 | 0.147  | -0.163 | 0.086  | 0.055  | 0.028  | -0.013 | 0.027  | 0.151  | -0.048 | -0.113 | 0.140  | -0.099 | -0.082 | 0.190  | -0.006 | 0.135  | 0.208  | -6.045 | 1      |   |
| JW1575 | b1583 | ynfB       | 15 | Qin | 0.127  | 0.226  | -0.181 | 0.134  | 0.273  | 0.043  | -0.073 | 0.140  | 0.007  | 0.023  | 0.057  | 0.153  | 0.091  | 0.152  | 0.059  | 0.052  | -0.040 | 0.128  | -0.043 | 0.250  | 0.011  | -5.087 | 1      |   |
| JW1576 | b1584 | speC       | 1  | Qin | -0.028 | 0.236  | -0.319 | -0.043 | 0.128  | -0.075 | -0.152 | 0.063  | -0.016 | -0.187 | -0.214 | -0.150 | -0.222 | -0.195 | -0.237 | 0.027  | -0.036 | -0.047 | -0.256 | -0.093 | -0.142 | -5.868 | 1      |   |
| JW1577 | b1585 | ynfC       | 15 | Qin | 0.142  | 0.202  | -0.309 | -0.150 | 0.002  | -0.201 | -0.003 | -0.123 | -0.052 | 0.080  | -0.002 | -0.064 | -0.013 | 0.019  | 0.033  | 0.093  | -0.062 | 0.022  | -0.172 | 0.027  | -0.093 | -0.013 | -6.518 | 1 |
| JW1578 | b1586 | ynfD       | 15 | Qin | 0.171  | 0.219  | -0.118 | -0.021 | 0.106  | -0.149 | 0.055  | 0.175  | 0.055  | 0.204  | 0.086  | 0.002  | 0.020  | 0.101  | 0.102  | 0.208  | 0.007  | 0.183  | -0.009 | 0.208  | 0.036  | -5.333 | 1      |   |
| JW1579 | b1587 | ynfE       | 6  | Qin | 0.142  | -0.002 | -0.284 | -0.068 | 0.033  | -0.162 | -0.083 | -5.801 | -0.054 | 0.183  | 0.051  | -0.099 | 0.007  | 0.088  | -0.009 | 0.013  | -5.411 | -5.969 | -0.133 | -0.011 | -0.986 | -6.050 | 1      |   |
| JW1580 | b1588 | ynfF       | 6  | Qin | 0.214  | 0.191  | -0.093 | 0.104  | 0.267  | -0.229 | -0.024 | -6.231 | 0.186  | 0.120  | 0.095  | -0.114 | 0.141  | 0.204  | 0.142  | 0.214  | -5.898 | -6.153 | 0.053  | -0.157 | -5.520 | -1.253 | 1      |   |
| JW1581 | b1589 | (dmsB)     | 6  | Qin | 0.135  | 0.021  | -0.186 | 0.007  | 0.331  | -0.127 | -0.057 | -2.297 | 0.195  | -0.074 | -0.041 | 0.155  | -0.038 | -0.022 | 0.038  | 0.057  | -1.983 | -2.271 | 0.071  | 0.156  | -2.037 | 0.073  | 1      |   |
| JW1582 | b1590 | (dmsC)     | 6  | Qin | -0.143 | -0.026 | -0.263 | 0.088  | 0.202  | 0.026  | -0.041 | -1.135 | 0.082  | 0.086  | 0.004  | 0.117  | 0.050  | 0.100  | 0.040  | 0.023  | -1.143 | -1.136 | 0.006  | 0.092  | -0.707 | -0.311 | 1      |   |
| JW1583 | b1591 | ynfI       | 15 | Qin | 0.443  | 0.150  | -0.071 | -0.004 | 0.370  | 0.017  | 0.059  | -0.021 | 0.131  | -0.004 | 0.004  | 0.024  | 0.098  | 0.129  | 0.065  | -0.040 | -0.110 | -0.045 | 0.122  | 0.033  | 0.036  | 0.033  | 1      |   |
| JW1584 | b1592 | (yadO)     | 15 | Qin | 0.194  | 0.108  | -0.151 | -0.065 | 0.164  | 0.055  | 0.104  | 0.050  | -0.084 | 0.010  | -0.012 | -0.001 | 0.077  | 0.164  | 0.062  | 0.000  | -0.041 | -0.037 | 0.110  | 0.167  | -0.022 | -0.026 | 1      |   |
| JW1585 | b1593 | (bioD)     | 2  | Qin | 0.229  | 0.026  | -0.135 | -0.070 | 0.221  | -0.023 | 0.142  | 0.126  | 0.092  | -0.003 | -0.050 | -0.133 | 0.046  | 0.112  | 0.065  | 0.202  | 0.132  | 0.145  | 0.051  | 0.204  | 0.014  | 0.041  | 1      |   |
| JW1586 | b1594 | mlc        | 14 | Qin | 0.136  | -0.006 | -0.259 | -0.219 | 0.031  | -0.073 | 0.049  | -0.037 | -0.103 | 0.027  | 0.035  | -0.161 | 0.023  | 0.059  | 0.029  | -0.011 | 0.015  | -0.031 | -0.161 | 0.115  | -0.098 | -0.008 | 1      |   |
| JW1587 | b1595 | ynfL       | 9  | Qin | 0.027  | -0.091 | -0.239 | -0.026 | 0.104  | -0.131 | -0.184 | 0.038  | 0.064  | 0.101  | 0.073  | 0.136  | -0.097 | -0.051 | -0.031 | -0.004 | 0.003  | 0.005  | -0.037 | 0.091  | -0.034 | -0.042 | 1      |   |
| JW1588 | b1596 | ynfM       | 15 | Qin | 0.053  | -0.012 | -0.246 | 0.012  | 0.068  | -0.008 | -0.059 | 0.066  | -0.004 | 0.172  | 0.087  | 0.164  | 0.103  | 0.149  | 0.035  | 0.021  | -0.073 | -0.026 | -0.114 | 0.161  | -0.082 | 0.026  | 1      |   |
| JW1589 | b1597 | asf        | 14 | Qin | 0.243  | 0.040  | -0.211 | -0.034 | 0.094  | 0.059  | -0.050 | 0.091  | 0.018  | 0.157  | 0.105  | 0.149  | 0.044  | 0.029  | -0.017 | 0.132  | 0.084  | 0.112  | -0.075 | 0.046  | 0.044  | 0.000  | 1      |   |
| JW1590 | b1598 | 311#13     | 15 | Qin | 0.268  | -0.094 | -0.259 | -0.083 | 0.099  | -0.003 | -0.077 | 0.067  | -0.008 | 0.148  | 0.083  | 0.032  | -0.036 | -0.029 | -0.131 | 0.153  | 0.029  | 0.044  | -0.066 | 0.175  | -0.035 | 0.022  | 1      |   |
| JW1591 | b1599 | 312#0.1    | 15 | Qin | 0.260  | 0.268  | 0.052  | 0.206  | 0.497  | -0.075 | 0.106  | 0.446  | 0.462  | 0.057  | 0.111  | 0.192  | 0.106  | 0.202  | 0.215  | 0.386  | 0.382  | 0.365  | 0.254  | 0.407  | 0.319  | 0.401  | 1      |   |
| JW1592 | b1600 | cbt        | 15 | Qin | 0.220  | 0.084  | -0.193 | -0.026 | 0.152  | -0.116 | -0.    |        |        |        |        |        |        |        |        |        |        |        |        |        |        |        |        |   |

|        |       |         |    |        |        |        |        |        |        |        |        |        |        |        |        |        |        |        |        |        |        |        |        |        |        |  |     |
|--------|-------|---------|----|--------|--------|--------|--------|--------|--------|--------|--------|--------|--------|--------|--------|--------|--------|--------|--------|--------|--------|--------|--------|--------|--------|--|-----|
| JW1635 | b1643 | ydhl    | 15 | 0.396  | 0.137  | -0.126 | 0.017  | 0.119  | -0.081 | 0.133  | 0.142  | 0.172  | 0.136  | 0.086  | -0.058 | 0.111  | 0.126  | 0.055  | 0.122  | 0.076  | -0.121 | -0.179 | 0.107  | 0.092  | 0.120  |  |     |
| JW1636 | b1644 | (yhqcQ) | 15 | 0.218  | 0.026  | -0.157 | 0.054  | 0.210  | -0.045 | -0.046 | 0.196  | 0.191  | 0.081  | 0.086  | -0.094 | 0.028  | 0.027  | -0.002 | 0.318  | 0.105  | 0.212  | -0.019 | 0.093  | 0.022  | -0.032 |  | 1   |
| JW1637 | b1645 | (yhpcP) | 15 | 0.129  | -0.215 | -0.382 | -0.195 | 0.164  | -0.178 | -0.335 | -0.004 | 0.013  | -0.063 | 0.007  | 0.018  | -0.245 | -0.288 | -0.199 | -0.049 | 0.010  | -0.043 | -0.134 | -0.155 | -0.057 | -0.237 |  | 1   |
| JW1638 | b1646 | sodC    | 4  | 0.227  | 0.048  | -0.152 | 0.030  | 0.266  | -0.047 | -0.054 | 0.170  | 0.081  | 0.005  | 0.008  | 0.098  | 0.016  | 0.090  | 0.004  | 0.062  | 0.048  | 0.026  | 0.052  | 0.040  | -0.042 | -0.074 |  | 1   |
| JW1639 | b1647 | ydHf    | 15 | 0.224  | 0.116  | -0.107 | -0.026 | 0.069  | 0.011  | 0.074  | 0.003  | -0.060 | 0.058  | 0.031  | 0.045  | 0.105  | 0.114  | 0.065  | -0.016 | 0.014  | -0.027 | 0.121  | 0.091  | -0.200 | -0.019 |  | 1   |
| JW1640 | b1648 | ydHL    | 15 | 0.487  | 0.138  | -0.062 | -0.042 | 0.148  | -0.017 | -0.396 | 0.038  | 0.059  | -0.139 | -0.035 | -0.048 | 0.145  | 0.197  | 0.089  | 0.038  | 0.014  | -0.127 | 0.128  | 0.115  | -0.114 | 0.105  |  | 1   |
| JW1641 | b1649 | ydHm    | 15 | 0.234  | 0.153  | 0.122  | 0.039  | 0.274  | -0.109 | 0.183  | 0.070  | 0.157  | 0.015  | -0.005 | -0.113 | 0.141  | 0.054  | 0.042  | 0.284  | 0.169  | 0.241  | 0.295  | 0.026  | -0.059 | -0.029 |  | 1   |
| JW1642 | b1650 | nemA    | 14 | 0.139  | 0.069  | -0.055 | -0.139 | -0.013 | -0.165 | 0.083  | -0.076 | -0.017 | 0.153  | 0.068  | -0.199 | 0.118  | 0.052  | 0.042  | 0.046  | -0.027 | -0.022 | 0.148  | 0.198  | -0.091 | -0.081 |  | 1   |
| JW1643 | b1651 | gloA    | 5  | 0.335  | 0.220  | -0.010 | 0.110  | 0.204  | -0.060 | 0.011  | 0.124  | 0.067  | 0.079  | 0.052  | 0.151  | 0.228  | 0.207  | 0.065  | 0.173  | 0.135  | 0.113  | 0.098  | 0.176  | 0.107  | 0.073  |  | 1   |
| JW1644 | b1652 | rnt     | 8  | 0.273  | 0.151  | 0.035  | 0.064  | 0.124  | 0.026  | 0.059  | 0.057  | -0.037 | 0.093  | 0.060  | 0.065  | 0.191  | 0.198  | 0.077  | 0.051  | 0.051  | 0.004  | 0.158  | 0.093  | -0.075 | -0.079 |  | 1   |
| JW1645 | b1653 | lhr     | 10 | -0.145 | -0.069 | -0.145 | -0.991 | -7.004 | -0.031 | -0.107 | 0.123  | -6.165 | -0.007 | 0.090  | 0.067  | -0.012 | -0.047 | -0.013 | -6.553 | -6.141 | -6.599 | 0.052  | -0.112 | -0.178 | -0.084 |  | 1   |
| JW1646 | b1654 | ydHD    | 15 | 0.311  | 0.255  | 0.028  | 0.136  | 0.297  | -0.091 | 0.010  | 0.264  | 0.167  | 0.084  | 0.044  | 0.144  | 0.191  | 0.211  | 0.091  | 0.197  | 0.102  | 0.194  | 0.117  | 0.226  | 0.149  | 0.061  |  | 1   |
| JW1647 | b1655 | ydHO    | 15 | 0.250  | 0.151  | -0.069 | 0.027  | 0.094  | 0.016  | 0.022  | 0.062  | -0.047 | 0.136  | 0.090  | 0.102  | 0.138  | 0.122  | 0.063  | 0.075  | 0.042  | 0.022  | 0.089  | 0.093  | -0.104 | 0.018  |  | 1   |
| JW1648 | b1656 | sodB    | 4  | 0.251  | 0.145  | -0.078 | 0.094  | 0.335  | 0.025  | 0.119  | 0.194  | 0.142  | 0.145  | 0.084  | 0.047  | 0.187  | 0.197  | 0.137  | 0.289  | 0.203  | 0.171  | 0.088  | 0.182  | -0.010 | 0.021  |  | 1   |
| JW1649 | b1657 | (araJ)  | 15 | 0.199  | 0.181  | -0.071 | 0.089  | 0.033  | -0.024 | 0.085  | 0.089  | 0.004  | 0.187  | 0.071  | -0.170 | 0.089  | 0.141  | 0.057  | 0.103  | 0.012  | 0.070  | 0.030  | 0.203  | -0.085 | -0.009 |  | 1   |
| JW1650 | b1658 | purR    | 8  | 0.307  | 0.006  | -0.090 | 0.168  | 0.304  | 0.082  | -0.010 | 0.183  | 0.074  | 0.022  | -0.014 | -0.144 | 0.047  | -0.157 | -0.083 | 0.171  | 0.092  | 0.099  | 0.054  | -0.074 | 0.001  | -0.316 |  | 1   |
| JW1651 | b1659 | ydHB    | 9  | 0.201  | 0.068  | -0.096 | -0.008 | 0.086  | -0.040 | -0.060 | 0.045  | -0.003 | 0.024  | 0.057  | -0.269 | 0.045  | 0.035  | 0.055  | 0.029  | -0.131 | 0.010  | 0.014  | 0.162  | 0.060  | -0.033 |  | 1   |
| JW1652 | b1660 | ydHC    | 15 | 0.117  | 0.023  | -0.241 | -0.054 | 0.236  | -0.095 | -0.098 | 0.180  | 0.115  | -0.010 | -0.007 | 0.015  | 0.019  | 0.067  | 0.109  | 0.067  | 0.070  | 0.088  | 0.021  | 0.137  | 0.038  | 0.098  |  | 1   |
| JW1653 | b1661 | cfa     | 7  | 0.275  | 0.017  | -0.252 | -0.030 | 0.288  | 0.034  | -0.061 | 0.213  | 0.154  | 0.022  | 0.035  | 0.003  | -0.073 | 0.046  | -0.006 | 0.063  | 0.051  | 0.082  | -0.069 | 0.028  | -0.033 | 0.088  |  | 1   |
| JW1654 | b1662 | ribE    | 2  | 0.201  | 0.050  | -0.175 | 0.004  | 0.299  | 0.062  | -0.024 | 0.216  | 0.071  | 0.010  | 0.018  | -0.102 | 0.039  | 0.071  | 0.020  | 0.081  | 0.037  | 0.012  | 0.039  | 0.122  | -0.052 | -0.007 |  | 1   |
| JW1655 | b1663 | ydHE    | 15 | 0.130  | 0.089  | -0.156 | -0.036 | 0.081  | 0.109  | 0.083  | 0.074  | -0.113 | 0.168  | 0.050  | -0.042 | 0.077  | 0.153  | 0.075  | 0.038  | -0.033 | -0.113 | 0.016  | 0.111  | -0.045 | 0.079  |  | 1   |
| JW1656 | b1664 | ag43    | 3  | -0.001 | -0.078 | -0.317 | -0.067 | 0.106  | 0.077  | -0.010 | 0.088  | -0.018 | 0.030  | 0.014  | -0.285 | -0.022 | 0.047  | 0.010  | 0.092  | -0.064 | -0.041 | -0.220 | 0.043  | 0.002  | 0.000  |  | 1   |
| JW1657 | b1665 | 319#9   | 15 | 0.164  | -0.095 | -0.402 | -0.337 | -0.270 | 0.041  | -0.071 | -0.204 | -0.439 | -0.025 | 0.107  | -0.316 | -0.190 | -0.240 | -0.194 | -0.306 | -0.271 | -0.321 | -0.239 | 0.219  | 0.018  | 0.051  |  | 1   |
| JW1658 | b1668 | 319#10  | 15 | 0.107  | 0.124  | -0.095 | -0.028 | 0.017  | -0.055 | 0.029  | 0.110  | 0.003  | 0.153  | 0.109  | -0.152 | 0.071  | 0.087  | 0.091  | 0.091  | -0.124 | 0.014  | 0.032  | 0.088  | -0.025 | 0.063  |  | 1   |
| JW1659 | b1669 | 319#11  | 15 | -0.123 | 0.105  | -0.222 | -0.086 | 0.057  | -0.025 | -0.122 | 0.177  | -0.072 | -0.106 | -0.062 | 0.038  | -0.095 | -0.083 | -0.064 | -0.108 | -0.068 | -0.061 | 0.000  | 0.021  | 0.036  | -0.019 |  | 1   |
| JW1660 | b1670 | pHsC    | 3  | 0.188  | -0.001 | -0.315 | -0.004 | 0.275  | 0.048  | -0.042 | 0.211  | 0.069  | 0.038  | 0.003  | 0.024  | -0.035 | 0.079  | 0.029  | 0.066  | 0.038  | 0.095  | -0.113 | 0.149  | 0.027  | -0.031 |  | 1   |
| JW1661 | b1671 | (nrFC)  | 15 | 0.275  | 0.115  | -0.144 | 0.041  | 0.248  | 0.133  | 0.095  | 0.104  | -0.073 | 0.058  | 0.028  | 0.039  | -0.017 | 0.066  | 0.014  | -0.016 | -0.065 | 0.053  | 0.040  | 0.131  | 0.006  | 0.086  |  | 1   |
| JW1662 | b1672 | 319#14  | 15 | 0.278  | 0.171  | -0.023 | 0.117  | 0.387  | 0.091  | 0.157  | 0.254  | 0.151  | 0.143  | 0.050  | -0.014 | 0.151  | 0.202  | 0.165  | 0.277  | 0.175  | 0.226  | 0.156  | 0.157  | 0.139  | 0.107  |  | 1   |
| JW1663 | b1673 | ydHV    | 15 | 0.050  | 0.015  | -0.297 | -0.045 | 0.109  | 0.066  | 0.042  | 0.060  | -0.045 | 0.161  | 0.080  | -0.218 | 0.013  | 0.044  | -0.004 | 0.219  | 0.019  | -0.027 | -0.064 | 0.190  | -0.062 | -0.004 |  | 1   |
| JW1664 | b1674 | 319#16  | 15 | 0.204  | 0.175  | -0.081 | -0.031 | 0.094  | -0.036 | 0.185  | 0.118  | 0.056  | 0.240  | 0.119  | -0.091 | 0.154  | 0.179  | 0.145  | 0.178  | 0.127  | 0.186  | 0.112  | 0.275  | 0.174  | 0.217  |  | 1   |
| JW1665 | b1675 | 319#17  | 15 | -0.049 | 0.108  | -0.096 | -0.020 | 0.119  | -0.158 | 0.063  | 0.141  | 0.099  | 0.138  | 0.109  | 0.178  | 0.095  | 0.120  | 0.150  | 0.227  | 0.195  | 0.242  | 0.057  | 0.402  | 0.177  | 0.038  |  | 1   |
| JW1666 | b1676 | ppyKF   | 6  | 0.090  | 0.105  | -0.402 | 0.059  | 0.242  | 0.080  | -0.330 | 0.166  | 0.073  | 0.185  | 0.121  | 0.060  | 0.227  | 0.126  | 0.150  | 0.106  | 0.019  | 0.091  | -0.247 | 0.227  | 0.080  | 0.084  |  | 1   |
| JW1667 | b1677 | lpp     | 3  | 0.391  | 0.239  | 0.109  | 0.204  | 0.392  | 0.131  | 0.063  | 0.268  | 0.201  | 0.139  | 0.119  | 0.129  | 0.322  | 0.204  | 0.100  | 0.301  | 0.222  | 0.197  | 0.212  | 0.271  | 0.129  | 0.388  |  | 1   |
| JW1668 | b1678 | ynhG    | 15 | 0.139  | 0.051  | -0.059 | -0.022 | -0.095 | 0.045  | 0.073  | -0.143 | -0.109 | 0.139  | 0.074  | -0.161 | 0.098  | 0.166  | 0.128  | -0.126 | -0.231 | -0.222 | 0.055  | 0.135  | 0.005  | 0.003  |  | 1   |
| JW1669 | b1679 | ynhA    | 15 | -0.184 | -0.061 | -0.253 | -0.231 | -0.414 | -0.054 | -0.125 | -0.470 | -0.366 | 0.115  | 0.092  | -0.039 | -0.117 | -0.094 | -0.053 | -0.454 | -0.475 | -0.525 | -0.100 | 0.090  | -0.001 | -0.064 |  | 1   |
| JW1670 | b1680 | sufS    | 14 | 0.185  | -0.127 | -0.300 | -0.172 | -0.217 | 0.031  | -0.180 | -0.121 | -0.319 | 0.105  | 0.003  | -0.253 | -0.141 | -0.103 | -0.162 | 0.044  | -0.060 | -0.157 | -0.162 | -0.005 | -0.232 | -0.104 |  | 1   |
| JW1671 | b1681 | ynhC    | 15 | 0.092  | -0.080 | -0.244 | -0.085 | 0.019  | -0.013 | -0.075 | -0.036 | -0.074 | 0.102  | 0.070  | -0.514 | 0.010  | -0.071 | -0.072 | -0.070 | -0.152 | -0.069 | -0.086 | 0.089  | -0.070 | -0.082 |  | 1   |
| JW1672 | b1682 | ynhD    | 15 | -0.048 | -0.060 | -0.168 | 0.038  | 0.113  | -0.029 | -0.215 | 0.065  | 0.093  | 0.055  | 0.096  | -0.138 | -0.042 | -0.293 | 0.031  | -0.033 | 0.073  | -0.053 | 0.003  | 0.137  | -0.097 | -0.037 |  | 1   |
| JW1673 | b1683 | ynhE    | 15 | 0.122  | -0.007 | -0.124 | 0.069  | 0.152  | -0.007 | -0.074 | 0.137  | 0.017  | 0.128  | 0.098  | 0.141  | -0.049 | -0.049 | -0.003 | 0.022  | 0.083  | 0.054  | 0.008  | 0.173  | -0.018 | 0.065  |  | 1   |
| JW1674 | b1684 | ydIC    | 15 | 0.218  | 0.215  | 0.058  | 0.178  | 0.237  | 0.036  | 0.051  | -0.133 | 0.032  | 0.093  | 0.093  | -0.004 | 0.202  | 0.242  | 0.168  | -0.118 | 0.110  | 0.152  | 0.157  | 0.091  | -0.011 | 0.172  |  | 1   |
| JW1675 | b1685 | ydIH    | 15 | 0.345  | 0.197  | -0.105 | 0.094  | -0.123 | 0.124  | 0.146  | 0.001  | -0.119 | 0.164  | 0.090  | 0.066  | 0.142  | 0.243  | 0.185  | 0.036  | -0.115 | -0.162 | 0.063  | 0.288  | 0.221  | 0.151  |  | 1   |
| JW1676 | b1686 | (ybdB)  | 15 | 0.194  | 0.202  | -0.037 | 0.102  | 0.207  | 0.062  | 0.136  | 0.113  | 0.042  | 0.139  | 0.059  | -0.183 | 0.061  | 0.074  | 0.074  | 0.207  | 0.131  | 0.161  | 0.076  | 0.407  | 0.084  | 0.270  |  | 1   |
| JW1677 | b1687 | ydIJ    | 15 | 0.256  | -0.085 | -0.220 | 0.009  | 0.079  | 0.102  | -0.124 | -0.032 | -0.111 | 0.087  | 0.032  | -0.253 | 0.102  | 0.064  | 0.099  | -0.191 | -0.192 | -0.278 | -0.052 | 0.034  | -0.284 | -0.165 |  | 1   |
| JW1678 | b1688 | 320#10  | 15 | 0.206  | 0.089  | -0.138 | 0.131  | 0.102  | 0.084  | 0.037  | 0.030  | -0.128 | 0.126  | 0.055  | 0.021  | 0.110  | 0.122  | 0.101  | -0.008 | -0.144 | -0.077 | 0.026  | 0.165  | 0.045  | 0.048  |  | 1   |
| JW1679 | b1689 | ydIL    | 15 | -0.205 | -0.217 | -0.409 | -0.158 | 0.162  | -0.109 | -0.112 | 0.070  | 0.140  | 0.124  | 0.058  | -0.009 | -0.101 | -0.268 | 0.062  | 0.116  | 0.063  | 0.206  | -0.201 | 0.016  | 0.002  | 0.130  |  | 1   |
| JW1680 | b1690 | ydIM    | 15 | 0.107  | 0.162  | -0.181 | -0.170 | -0.096 | 0.062  | 0.196  | -0.372 | -0.144 | 0.022  | -0.114 | -0.058 | 0.143  | 0.209  | 0.153  | -0.343 | -0.333 | -0.461 | 0.026  | 0.247  | 0.078  | 0.227  |  | 1</ |

|        |       |                  |    |        |               |               |        |               |        |               |               |               |        |               |               |               |               |               |               |               |               |               |        |        |               |       |   |
|--------|-------|------------------|----|--------|---------------|---------------|--------|---------------|--------|---------------|---------------|---------------|--------|---------------|---------------|---------------|---------------|---------------|---------------|---------------|---------------|---------------|--------|--------|---------------|-------|---|
| JW1726 | b1737 | ceiB             | 11 | 0.185  | 0.032         | -0.114        | 0.012  | 0.018         | 0.154  | 0.043         | -0.019        | -0.208        | 0.069  | -0.277        | -0.093        | <b>-2.650</b> | -0.692        | -0.753        | -0.017        | -0.137        | -0.159        | -0.034        | 0.188  | 0.018  | 0.000         | 1     |   |
| JW1727 | b1738 | ceiA             | 11 | 0.311  | 0.154         | 0.086         | 0.190  | 0.541         | 0.060  | 0.218         | 0.308         | 0.363         | 0.096  | <b>-3.830</b> | -0.107        | 0.123         | -0.068        | -0.041        | 0.353         | 0.264         | 0.297         | 0.116         | 0.293  | 0.226  | 0.159         | 1     |   |
| JW1728 | b1739 | osmE             | 14 | -0.103 | 0.172         | 0.154         | 0.287  | 0.321         | -0.098 | 0.057         | 0.405         | 0.376         | 0.217  | -0.397        | 0.176         | 0.209         | -0.064        | 0.134         | 0.357         | 0.349         | 0.404         | 0.177         | 0.276  | 0.222  | 0.215         | 1     |   |
| JW1729 | b1740 | nadE             | 2  | 0.076  | 0.117         | -0.039        | 0.193  | 0.250         | 0.004  | -0.128        | 0.344         | 0.110         | 0.193  | 0.160         | 0.119         | -0.057        | -0.050        | -0.013        | 0.198         | 0.102         | 0.158         | 0.005         | 0.183  | 0.064  | 0.100         | 1     |   |
| JW1730 | b1741 | 327#4            | 15 | 0.177  | 0.004         | -0.092        | 0.256  | 0.318         | 0.098  | -0.177        | 0.086         | 0.023         | 0.061  | 0.107         | 0.081         | 0.007         | -0.036        | -0.029        | 0.088         | -0.060        | -0.080        | -0.051        | 0.006  | -0.016 | -0.012        | 1     |   |
| JW1731 | b1742 | 327#5            | 15 | 0.273  | 0.111         | 0.117         | 0.213  | 0.167         | 0.140  | 0.068         | 0.123         | -0.005        | 0.062  | 0.046         | 0.026         | 0.207         | 0.283         | 0.225         | 0.139         | 0.094         | 0.000         | 0.139         | 0.182  | -0.003 | 0.119         | 1     |   |
| JW1732 | b1743 | spy              | 15 | 0.262  | 0.147         | 0.082         | 0.180  | 0.356         | -0.030 | 0.079         | 0.193         | 0.195         | 0.061  | 0.040         | -0.078        | 0.159         | 0.100         | 0.097         | 0.248         | 0.138         | 0.055         | 0.104         | 0.188  | 0.071  | -0.012        | 1     |   |
| JW1733 | b1744 | astE             | 1  | 0.046  | 0.222         | 0.210         | 0.215  | 0.268         | 0.084  | 0.185         | 0.149         | 0.135         | 0.107  | 0.064         | -0.130        | 0.127         | 0.106         | 0.101         | 0.221         | 0.141         | 0.221         | 0.164         | 0.197  | 0.160  | 0.001         | 0.031 | 1 |
| JW1734 | b1745 | astB             | 1  | -0.067 | -0.090        | -0.092        | -0.113 | -0.054        | -0.091 | -0.135        | -0.469        | -0.110        | -0.070 | -0.052        | -0.047        | -0.171        | -0.428        | -0.060        | -0.136        | -0.252        | -0.605        | 0.039         | -0.003 | -0.102 | -0.034        | 1     |   |
| JW1735 | b1746 | astD             | 1  | 0.116  | -0.042        | -0.118        | -0.035 | -0.009        | 0.007  | -0.173        | -0.188        | -0.167        | -0.165 | -0.175        | -0.203        | 0.021         | -0.125        | -0.047        | -0.296        | -0.341        | -0.358        | 0.082         | 0.028  | -0.108 | -0.082        | 1     |   |
| JW1736 | b1747 | astA             | 1  | 0.158  | 0.008         | -0.065        | -0.034 | -0.004        | 0.055  | -0.060        | -0.188        | -0.275        | -0.091 | -0.122        | -0.125        | 0.033         | -0.063        | -0.024        | -0.271        | -0.183        | -0.327        | 0.028         | 0.026  | -0.120 | -0.131        | 1     |   |
| JW1737 | b1748 | cstC / astC/argM | 1  | 0.187  | 0.151         | 0.107         | 0.094  | 0.009         | 0.048  | 0.012         | -0.065        | -0.187        | 0.031  | -0.040        | -0.134        | 0.189         | 0.124         | 0.133         | -0.082        | -0.063        | -0.118        | 0.174         | 0.094  | -0.099 | -0.078        | 1     |   |
| JW1738 | b1749 | xthA             | 8  | 0.132  | 0.150         | 0.067         | 0.101  | 0.138         | -0.011 | 0.056         | 0.033         | 0.046         | 0.116  | 0.063         | -0.094        | 0.135         | 0.087         | 0.125         | 0.101         | 0.077         | -0.030        | 0.118         | 0.192  | -0.117 | 0.036         | 1     |   |
| JW1739 | b1750 | ygeD             | 15 | 0.227  | 0.117         | -0.116        | 0.117  | 0.266         | -0.065 | 0.023         | 0.148         | 0.206         | 0.073  | 0.048         | -0.172        | 0.110         | 0.097         | 0.096         | 0.247         | 0.124         | 0.112         | -0.063        | 0.164  | -0.046 | -0.003        | 1     |   |
| JW1740 | b1751 | ydjY             | 15 | -0.067 | -0.019        | -0.232        | 0.008  | 0.170         | -0.115 | -0.128        | 0.136         | 0.238         | 0.069  | 0.027         | 0.082         | -0.046        | -0.164        | 0.065         | 0.147         | 0.091         | 0.140         | -0.045        | 0.061  | -0.027 | 0.045         | 1     |   |
| JW1741 | b1752 | ydjZ             | 15 | 0.051  | -0.040        | -0.176        | -0.107 | -0.154        | -0.064 | -0.078        | 0.065         | -0.165        | 0.118  | 0.019         | 0.060         | -0.002        | -0.048        | 0.016         | 0.021         | 0.085         | 0.154         | -0.043        | 0.054  | -0.003 | 0.017         | 1     |   |
| JW1742 | b1753 | ynjA             | 15 | 0.500  | -0.342        | -0.439        | -0.044 | 0.267         | 0.011  | -0.425        | 0.089         | 0.016         | 0.042  | 0.004         | 0.010         | -0.258        | -0.401        | -0.390        | -0.066        | 0.103         | 0.011         | -0.322        | -0.257 | -0.037 | -0.193        | 1     |   |
| JW1743 | b1754 | 328#9            | 15 | 0.164  | -0.162        | -0.154        | -0.062 | 0.066         | 0.155  | -0.109        | -0.010        | -0.165        | 0.048  | 0.024         | -0.129        | -0.059        | -0.167        | -0.165        | -0.095        | -0.083        | -0.157        | 0.012         | -0.049 | -0.219 | -0.144        | 1     |   |
| JW1745 | b1756 | 328#11           | 11 | 0.262  | -0.269        | -0.474        | -0.384 | -0.188        | 0.104  | -0.308        | -0.426        | -0.249        | 0.048  | 0.038         | -0.064        | -0.371        | -0.362        | -0.415        | -0.474        | -0.356        | -0.520        | -0.332        | 0.011  | -0.013 | -0.413        | 1     |   |
| JW1746 | b1757 | ynjE             | 15 | 0.136  | 0.040         | -0.061        | -0.036 | 0.134         | 0.044  | 0.041         | -0.128        | -0.027        | 0.020  | 0.011         | -0.239        | 0.039         | -0.035        | -0.024        | -0.149        | -0.087        | -0.193        | 0.048         | 0.026  | -0.043 | 0.022         | 1     |   |
| JW1747 | b1758 | 328#13           | 15 | -0.040 | -0.308        | 0.005         | -0.311 | -0.567        | -0.039 | 0.068         | -0.538        | -0.640        | -0.056 | -0.016        | -0.802        | 0.009         | -0.108        | -0.002        | -0.612        | -0.542        | -0.595        | 0.049         | 0.224  | -0.145 | 0.109         | 1     |   |
| JW1748 | b1759 | 328#14           | 8  | -0.445 | -0.228        | -0.212        | -0.124 | -0.129        | -0.155 | -0.285        | -0.037        | -0.125        | 0.111  | 0.097         | -0.128        | -0.082        | -0.380        | -0.187        | -0.153        | -0.185        | -0.195        | -0.184        | -0.124 | -0.177 | -0.258        | 1     |   |
| JW1749 | b1760 | 328#15           | 15 | -0.098 | -0.225        | 0.009         | 0.132  | 0.280         | -0.150 | -0.103        | -0.021        | 0.121         | -0.004 | 0.027         | -0.199        | 0.079         | 0.055         | 0.019         | -0.172        | -0.055        | 0.023         | 0.076         | 0.364  | 0.120  | 0.052         | 1     |   |
| JW1750 | b1761 | gdhA             | 1  | 0.222  | -0.059        | -0.191        | 0.032  | 0.095         | 0.046  | -0.227        | -0.081        | -0.079        | 0.081  | 0.080         | -0.125        | 0.009         | 0.266         | -0.086        | -0.042        | -0.131        | -0.158        | -0.111        | -0.001 | -0.089 | -0.222        | 1     |   |
| JW1751 | b1762 | 329#1            | 15 | 0.095  | 0.088         | -0.164        | -0.972 | <b>-2.818</b> | -0.022 | 0.046         | <b>-2.659</b> | <b>-2.925</b> | 0.070  | 0.032         | <b>-0.251</b> | 0.135         | 0.052         | 0.098         | <b>-3.221</b> | <b>-2.919</b> | <b>-3.007</b> | -0.043        | 0.130  | 0.059  | 0.030         | 1     |   |
| JW1752 | b1763 | topB             | 10 | 0.085  | 0.086         | 0.035         | -0.059 | 0.004         | 0.024  | 0.027         | -0.070        | 0.289         | 0.077  | 0.033         | -0.286        | 0.082         | -0.049        | -0.046        | -0.100        | -0.106        | -0.206        | 0.170         | 0.079  | -0.085 | -0.072        | 1     |   |
| JW1753 | b1764 | selD             | 12 | -0.328 | -0.195        | -0.148        | -0.022 | 0.006         | -0.081 | -0.251        | 0.019         | -0.026        | 0.057  | 0.165         | -0.015        | 0.146         | -0.158        | 0.126         | -0.122        | -0.186        | -0.122        | -0.051        | 0.253  | -0.154 | -0.113        | 1     |   |
| JW1754 | b1765 | yjdA             | 15 | -0.063 | -0.147        | -0.058        | 0.012  | -0.017        | -0.063 | -0.180        | -0.090        | -0.095        | 0.097  | 0.045         | -0.032        | -0.116        | -0.137        | -0.123        | -0.083        | -0.043        | -0.033        | 0.000         | 0.113  | -0.197 | -0.043        | 1     |   |
| JW1755 | b1766 | sppA             | 14 | 0.121  | -0.039        | -0.030        | 0.162  | 0.213         | 0.047  | -0.140        | 0.117         | -0.032        | 0.091  | 0.104         | -0.117        | 0.068         | -0.053        | 0.021         | 0.094         | 0.007         | 0.055         | -0.043        | 0.038  | -0.018 | -0.082        | 1     |   |
| JW1756 | b1767 | ansA             | 5  | 0.339  | 0.143         | -0.029        | 0.186  | 0.212         | 0.094  | -0.016        | 0.066         | 0.008         | 0.107  | 0.067         | -0.125        | 0.010         | 0.032         | 0.000         | 0.074         | -0.017        | 0.043         | 0.014         | 0.224  | 0.120  | 0.037         | 1     |   |
| JW1757 | b1768 | yjdB             | 15 | 0.257  | 0.056         | -0.049        | -0.100 | -0.193        | -0.064 | 0.030         | -0.257        | -0.268        | 0.010  | -0.041        | -0.206        | 0.102         | 0.026         | 0.031         | -0.169        | -0.263        | -0.267        | 0.036         | -0.315 | -0.056 | -0.005        | 1     |   |
| JW1758 | b1769 | yjdE             | 11 | 0.125  | <b>-6.190</b> | <b>-7.078</b> | -0.896 | 0.052         | -0.010 | <b>-6.099</b> | -0.017        | 0.030         | -0.071 | -0.103        | <b>-1.471</b> | <b>-6.647</b> | <b>-6.269</b> | <b>-6.195</b> | -0.018        | -0.202        | -0.113        | <b>-6.080</b> | 0.036  | -0.052 | <b>-6.473</b> | 1     |   |
| JW1759 | b1770 | yjdF             | 15 | 0.429  | <b>-5.953</b> | <b>-6.429</b> | -0.608 | 0.635         | 0.175  | <b>-5.819</b> | 0.297         | 0.261         | -0.111 | -0.004        | -0.106        | <b>-6.185</b> | <b>-6.193</b> | <b>-5.778</b> | 0.216         | 0.153         | 0.266         | <b>-5.800</b> | 0.124  | 0.049  | <b>-5.977</b> | 1     |   |
| JW1760 | b1771 | yjdG             | 15 | 0.366  | <b>-6.343</b> | <b>-7.226</b> | -0.793 | 0.262         | 0.176  | <b>-6.403</b> | 0.123         | 0.036         | -0.009 | 0.036         | -0.027        | <b>-6.817</b> | <b>-6.592</b> | <b>-6.553</b> | 0.073         | 0.010         | 0.096         | <b>-6.190</b> | 0.258  | 0.210  | <b>-6.427</b> | 1     |   |
| JW1761 | b1772 | 330#4            | 15 | 0.198  | <b>-6.277</b> | <b>-7.431</b> | -0.748 | 0.423         | 0.180  | <b>-6.375</b> | 0.346         | 0.138         | -0.098 | -0.118        | <b>-0.299</b> | <b>-6.909</b> | <b>-6.736</b> | <b>-6.552</b> | 0.194         | 0.123         | 0.101         | <b>-6.174</b> | -0.141 | -0.002 | <b>-6.613</b> | 1     |   |
| JW1762 | b1773 | 330#5            | 15 | -0.133 | <b>-6.935</b> | <b>-8.330</b> | -0.941 | 0.128         | 0.101  | <b>-6.681</b> | 0.127         | -0.014        | 0.064  | -0.095        | <b>-1.146</b> | <b>-7.196</b> | <b>-6.959</b> | <b>-7.051</b> | 0.123         | -0.032        | 0.054         | <b>-6.837</b> | 0.112  | 0.035  | <b>-7.302</b> | 1     |   |
| JW1763 | b1774 | yjdJ             | 15 | -0.209 | <b>-6.650</b> | <b>-7.774</b> | -0.665 | 0.041         | -0.077 | <b>-6.542</b> | 0.341         | 0.286         | 0.156  | 0.248         | <b>-4.979</b> | <b>-6.705</b> | <b>-7.028</b> | <b>-6.726</b> | 0.219         | 0.164         | 0.323         | <b>-6.203</b> | 0.245  | 0.248  | <b>-7.249</b> | 1     |   |
| JW1764 | b1775 | yjdK             | 11 | 0.127  | <b>-6.521</b> | <b>-7.121</b> | -0.614 | -0.178        | 0.078  | <b>-6.443</b> | 0.179         | 0.129         | 0.020  | 0.019         | 0.007         | <b>-6.730</b> | <b>-6.655</b> | <b>-6.375</b> | 0.130         | 0.031         | 0.092         | <b>-6.188</b> | 0.082  | -0.002 | <b>-6.748</b> | 1     |   |
| JW1765 | b1776 | (tdh)            | 15 | 0.099  | <b>-6.187</b> | <b>-6.527</b> | -0.584 | 0.329         | 0.175  | <b>-5.892</b> | 0.176         | 0.056         | 0.097  | 0.074         | 0.065         | <b>-6.295</b> | <b>-5.999</b> | <b>-5.977</b> | 0.183         | 0.008         | 0.092         | <b>-5.909</b> | 0.005  | -0.035 | <b>-6.217</b> | 1     |   |
| JW1766 | b1777 | 330#9            | 15 | 0.054  | -0.131        | -0.117        | 0.080  | 0.240         | 0.082  | -0.060        | 0.167         | 0.033         | -0.496 | -0.483        | 0.035         | -0.342        | -0.420        | -0.432        | 0.232         | 0.130         | 0.263         | -0.117        | 0.049  | 0.081  | -0.358        | 1     |   |
| JW1767 | b1778 | yeaA             | 15 | -0.189 | -0.186        | 0.001         | -0.008 | -0.041        | -0.124 | -0.038        | -0.049        | -0.015        | -0.053 | 0.099         | -0.132        | -0.209        | 0.111         | -0.293        | -0.308        | 0.047         | 0.064         | -0.031        | 0.172  | 0.108  | 1             |       |   |
| JW1768 | b1779 | gapA             | 6  | 0.176  | 0.123         | 0.150         | 0.237  | 0.466         | 0.030  | 0.059         | 0.384         | 0.269         | 0.150  | 0.060         | 0.121         | 0.140         | 0.117         | 0.164         | 0.250         | 0.229         | 0.337         | 0.238         | 0.293  | 0.178  | 0.174         | 1     |   |
| JW1769 | b1780 | yyzQ             | 15 | 0.033  | 0.040         | -0.029        | 0.073  | 0.027         | 0.146  | -0.002        | 0.045         | -0.150        | 0.002  | -0.032        | -0.128        | -0.018        | -0.045        | -0.012        | -0.104        | -0.195        | -0.047        | 0.032         | 0.110  | -0.116 | -0.058        | 1     |   |
| JW1770 | b1781 | 331#2            | 15 | 0.176  | -0.015        | -0.092        | 0.161  | 0.226         | 0.117  | -0.023        | 0.131         | 0.038         | 0.057  | 0.024         | -0.156        | 0.071         | -0.012        | 0.021         | -0.008        | -0.091        | -0.058        | -0.053        | -0.164 | 0.050  | -0.078        | 1     |   |
| JW1771 | b1782 | yeaF             | 3  | -0.017 | 0.039         | 0.137         | 0.339  | 0.392         | 0.002  | 0.064         | 0.386         | 0.235         | 0.154  | 0.100         | 0.110         | 0.061         | 0.089         | 0.123         | 0.258         | 0.186         | 0.350         | 0.165         | 0.172  | 0.007  | 0.099         | 1     |   |
| JW1772 | b1783 | yeaG             | 15 | 0.270  | 0.078         | 0.053         | 0.356  | 0.411         | 0.092  | 0.014         | 0.314         |               |        |               |               |               |               |               |               |               |               |               |        |        |               |       |   |

|        |       |             |    |        |        |        |        |        |        |        |        |        |        |        |        |        |        |        |        |        |        |        |        |        |        |  |   |
|--------|-------|-------------|----|--------|--------|--------|--------|--------|--------|--------|--------|--------|--------|--------|--------|--------|--------|--------|--------|--------|--------|--------|--------|--------|--------|--|---|
| JW1823 | b1834 | (pqjB)      | 15 | 0.103  | 0.027  | -0.060 | 0.252  | 0.064  | -0.003 | 0.010  | 0.042  | 0.070  | 0.005  | 0.007  | -0.253 | 0.149  | 0.056  | -0.032 | 0.036  | 0.053  | -0.070 | 0.063  | 0.052  | -0.100 | -0.241 |  |   |
| JW1824 | b1835 | yebU        | 15 | -0.379 | -0.029 | -0.147 | 0.192  | -0.136 | -0.065 | -0.235 | -0.175 | 0.029  | -0.206 | -0.266 | -0.200 | -0.153 | -0.092 | -0.110 | -0.224 | -0.208 | -0.273 | -0.169 | -0.181 | -0.187 | -0.693 |  | 1 |
| JW1825 | b1836 | 336#6       | 15 | -0.077 | 0.020  | -0.122 | 0.293  | 0.040  | 0.016  | -0.053 | 0.161  | 0.071  | 0.082  | -0.021 | 0.053  | 0.213  | 0.212  | 0.083  | 0.052  | 0.058  | 0.201  | -0.129 | 0.231  | 0.062  | 0.060  |  | 1 |
| JW1826 | b1837 | 336#7       | 15 | 0.284  | 0.071  | -0.099 | 0.349  | 0.199  | 0.039  | -0.026 | -0.005 | 0.146  | -0.111 | -0.103 | -0.094 | 0.266  | 0.259  | 0.137  | 0.103  | 0.162  | 0.169  | -0.045 | 0.147  | 0.172  | 0.061  |  | 1 |
| JW1827 | b1838 | pphA / prpA | 14 | 0.154  | 0.066  | -0.032 | 0.342  | 0.024  | -0.005 | 0.025  | -0.019 | 0.042  | -0.076 | -0.071 | -0.203 | 0.263  | 0.166  | 0.123  | 0.108  | -0.014 | -0.031 | -0.001 | 0.199  | 0.080  | -0.753 |  | 1 |
| JW1828 | b1839 | 336#9       | 15 | -0.034 | -0.156 | -0.260 | 0.159  | -0.117 | 0.027  | -0.114 | -0.037 | 0.479  | -0.130 | -0.202 | -0.135 | 0.110  | 0.133  | 0.104  | -0.108 | -0.193 | -0.066 | -0.162 | -0.096 | -0.008 | -2.070 |  | 1 |
| JW1829 | b1840 | 336#10      | 15 | -0.073 | 0.070  | -0.021 | 0.426  | 0.005  | -0.077 | -0.126 | 0.110  | 0.729  | -0.011 | 0.083  | 0.031  | 0.120  | 0.166  | 0.119  | 0.090  | 0.013  | -0.014 | 0.007  | 0.368  | 0.130  | -3.851 |  | 1 |
| JW1830 | b1841 | 336#11      | 15 | 0.168  | 0.331  | 0.187  | 0.600  | 0.278  | -0.029 | 0.028  | 0.170  | 1.013  | 0.130  | 0.057  | 0.095  | 0.270  | 0.266  | 0.153  | 0.235  | 0.021  | 0.227  | 0.154  | 0.291  | 0.107  | -4.973 |  | 1 |
| JW1831 | b1842 | holE        | 10 | 0.142  | 0.198  | 0.046  | 0.563  | 0.306  | 0.062  | 0.142  | 0.246  | 0.982  | 0.210  | 0.144  | 0.115  | 0.296  | 0.279  | 0.239  | 0.319  | 0.178  | 0.252  | 0.056  | 0.166  | 0.191  | -4.006 |  | 1 |
| JW1832 | b1843 | 336#13      | 10 | 0.201  | 0.190  | 0.119  | 0.552  | 0.186  | -0.048 | 0.140  | 0.200  | 0.771  | 0.132  | 0.058  | -0.171 | 0.160  | 0.160  | 0.145  | 0.211  | 0.043  | 0.122  | 0.112  | 0.252  | 0.018  | -2.499 |  | 1 |
| JW1833 | b1844 | exoX        | 10 | 0.079  | 0.071  | 0.022  | 0.413  | 0.136  | -0.102 | 0.005  | 0.117  | 0.766  | -0.048 | -0.023 | -0.170 | -0.104 | -0.058 | -0.009 | 0.029  | 0.016  | 0.042  | 0.142  | 0.005  | 0.078  | -3.202 |  | 1 |
| JW1834 | b1845 | ptrB        | 14 | 0.227  | 0.140  | 0.038  | 0.389  | 0.078  | -0.050 | 0.075  | -0.024 | 0.834  | 0.098  | 0.058  | 0.016  | 0.119  | 0.133  | 0.136  | 0.003  | -0.019 | 0.009  | 0.148  | 0.063  | 0.015  | -7.362 |  | 1 |
| JW1835 | b1846 | yebE        | 15 | 0.267  | 0.118  | 0.069  | 0.356  | 0.153  | -0.066 | 0.032  | 0.043  | 0.839  | -0.017 | 0.005  | -0.097 | 0.111  | 0.116  | 0.097  | 0.100  | 0.163  | 0.104  | 0.118  | 0.210  | -0.013 | -3.154 |  | 1 |
| JW1836 | b1847 | yebF        | 15 | 0.217  | 0.127  | 0.013  | 0.315  | 0.081  | -0.075 | 0.133  | -0.117 | 0.825  | 0.009  | 0.028  | -0.070 | 0.133  | 0.193  | 0.116  | 0.064  | 0.077  | 0.065  | 0.076  | 0.012  | -0.065 | -4.859 |  | 1 |
| JW1837 | b1848 | yebG        | 15 | 0.142  | 0.058  | -0.069 | 0.329  | 0.090  | -0.085 | 0.154  | 0.036  | 0.889  | 0.065  | -0.034 | -0.124 | 0.105  | 0.139  | 0.138  | 0.299  | 0.162  | 0.085  | -0.054 | 0.159  | 0.135  | -3.557 |  | 1 |
| JW1838 | b1849 | purT        | 8  | 0.200  | -0.097 | -0.014 | 0.245  | -0.063 | -0.120 | 0.036  | -0.167 | 0.737  | 0.014  | 0.018  | -0.277 | 0.059  | 0.021  | 0.072  | -0.128 | -0.105 | -0.174 | 0.046  | 0.187  | -0.185 | -7.669 |  | 1 |
| JW1839 | b1850 | eda         | 6  | 0.142  | 0.130  | 0.142  | 0.492  | 0.220  | -0.058 | 0.055  | 0.101  | 0.916  | 0.071  | 0.030  | 0.067  | 0.277  | 0.243  | 0.151  | 0.109  | 0.075  | 0.185  | 0.154  | 0.242  | 0.078  | -5.147 |  | 1 |
| JW1840 | b1851 | edd         | 6  | 0.214  | 0.087  | 0.067  | 0.466  | 0.158  | -0.009 | -0.005 | 0.144  | 0.708  | 0.082  | 0.027  | -0.037 | 0.175  | 0.103  | 0.110  | 0.169  | 0.074  | 0.077  | 0.115  | 0.204  | 0.108  | -2.310 |  | 1 |
| JW1841 | b1852 | zwf         | 6  | 0.336  | 0.091  | 0.179  | 0.476  | 0.330  | 0.000  | 0.099  | 0.198  | 0.961  | 0.007  | 0.032  | -0.104 | 0.192  | 0.183  | 0.141  | 0.194  | 0.180  | 0.089  | 0.218  | 0.243  | 0.098  | -6.928 |  | 1 |
| JW1842 | b1853 | yebK        | 15 | 0.243  | 0.194  | 0.043  | 0.432  | 0.146  | -0.060 | 0.149  | 0.151  | 0.948  | 0.015  | -0.010 | -0.114 | 0.044  | 0.107  | 0.008  | 0.157  | 0.134  | 0.102  | 0.104  | 0.135  | -0.032 | -6.030 |  | 1 |
| JW1843 | b1854 | pykA        | 6  | 0.219  | 0.232  | 0.156  | 0.476  | 0.183  | -0.183 | 0.067  | 0.141  | 1.072  | 0.044  | 0.076  | -0.178 | 0.201  | 0.118  | 0.141  | 0.285  | 0.103  | 0.171  | 0.190  | 0.276  | -0.005 | -3.725 |  | 1 |
| JW1844 | b1855 | mit         | 3  | 0.145  | 0.169  | -0.133 | 0.275  | 0.194  | -0.142 | -0.112 | 0.145  | 1.017  | 0.035  | 0.028  | 0.055  | 0.047  | 0.118  | 0.165  | 0.104  | 0.118  | 0.124  | -0.041 | 0.196  | 0.105  | 0.142  |  | 1 |
| JW1845 | b1856 | yebA        | 15 | 0.254  | 0.077  | -0.100 | 0.392  | 0.210  | -0.077 | 0.020  | 0.157  | 0.982  | 0.064  | -0.019 | 0.030  | 0.163  | 0.100  | 0.099  | 0.094  | 0.107  | 0.078  | 0.119  | 0.164  | 0.092  | 0.133  |  | 1 |
| JW1846 | b1857 | znuA / yebL | 11 | 0.251  | 0.063  | -0.036 | 0.270  | 0.072  | -0.018 | 0.015  | 0.041  | 0.821  | -0.003 | -0.062 | -0.024 | 0.073  | 0.069  | 0.005  | -0.026 | -0.023 | 0.001  | 0.131  | 0.130  | 0.044  | 0.080  |  | 1 |
| JW1847 | b1858 | znuC / yebM | 11 | 0.265  | -0.028 | 0.067  | 0.311  | 0.033  | -0.028 | 0.176  | -0.031 | 0.773  | 0.047  | 0.009  | -0.074 | 0.104  | 0.103  | 0.040  | 0.077  | 0.083  | 0.026  | 0.104  | 0.127  | -0.047 | 0.109  |  | 1 |
| JW1848 | b1859 | yebI / znuB | 11 | 0.143  | -0.058 | -0.371 | -0.031 | -0.126 | -0.098 | -0.194 | 0.012  | 0.774  | -0.179 | -0.170 | -0.232 | -0.058 | -0.125 | -0.071 | 0.043  | -0.010 | -0.086 | -0.280 | 0.005  | -0.338 | -0.048 |  | 1 |
| JW1849 | b1860 | ruvB        | 10 | 0.232  | -0.138 | -0.078 | 0.208  | -0.090 | -0.058 | 0.072  | 0.023  | 0.780  | 0.105  | 0.037  | -0.182 | 0.078  | 0.008  | 0.011  | 0.005  | -0.008 | -0.014 | 0.073  | 0.131  | -0.007 | 0.008  |  | 1 |
| JW1850 | b1861 | ruvA        | 10 | 0.304  | -0.059 | -0.411 | 0.012  | 0.041  | -0.079 | -0.289 | -0.001 | 0.843  | -0.231 | -0.205 | -0.512 | 0.033  | -0.057 | -0.009 | 0.015  | -0.002 | -0.091 | -0.267 | 0.183  | -0.159 | -0.330 |  | 1 |
| JW1851 | b1862 | yebB        | 15 | 0.029  | -0.330 | -0.227 | 0.074  | -0.203 | -0.194 | -0.205 | -0.235 | 0.637  | -0.117 | -0.111 | -0.162 | 0.022  | 0.022  | 0.103  | -0.115 | -0.326 | -0.294 | -0.224 | 0.027  | -0.168 | -0.134 |  | 1 |
| JW1852 | b1863 | ruvC        | 10 | 0.417  | -0.113 | 0.032  | 0.428  | 0.284  | -0.089 | -0.120 | 0.131  | 0.873  | -0.153 | -0.200 | -0.153 | 0.209  | 0.141  | 0.037  | 0.174  | 0.161  | 0.178  | 0.070  | 0.057  | 0.181  | 0.054  |  | 1 |
| JW1853 | b1864 | yebC        | 10 | 0.289  | -0.065 | 0.070  | 0.413  | 0.172  | -0.043 | 0.051  | -0.002 | 0.811  | -0.076 | -0.088 | -0.143 | 0.119  | 0.139  | 0.019  | 0.057  | 0.013  | 0.062  | 0.121  | 0.087  | -0.024 | 0.020  |  | 1 |
| JW1854 | b1865 | ntpA        | 10 | 0.315  | 0.195  | 0.230  | 0.436  | 0.147  | -0.211 | 0.100  | -0.022 | 0.788  | -0.051 | 0.116  | -0.084 | 0.177  | 0.306  | 0.055  | 0.031  | -0.024 | -0.093 | 0.255  | 0.180  | -0.185 | -0.138 |  | 1 |
| JW1855 | b1866 | aspS        | 12 | 0.140  | 0.000  | 0.002  | 0.141  | 0.042  | -0.097 | -0.018 | 0.031  | 0.891  | 0.081  | 0.030  | -0.161 | 0.021  | -0.021 | -0.078 | 0.052  | 0.019  | -0.067 | 0.043  | 0.090  | -0.140 | -0.123 |  | 1 |
| JW1856 | b1867 | yecD        | 15 | -0.102 | -0.159 | -0.257 | -0.086 | -0.532 | -0.245 | -0.260 | -0.438 | 0.471  | 0.095  | 0.057  | -0.315 | -0.337 | -0.444 | -0.357 | -0.167 | -0.312 | -0.298 | -0.243 | -0.203 | -0.195 | -0.349 |  | 1 |
| JW1857 | b1868 | yecE        | 15 | 0.134  | 0.148  | 0.074  | 0.067  | 0.078  | -0.240 | 0.035  | 0.123  | 0.996  | 0.091  | 0.075  | -0.061 | 0.145  | 0.158  | 0.158  | 0.326  | 0.143  | 0.269  | 0.129  | -0.787 | -0.849 | -0.837 |  | 1 |
| JW1858 | b1869 | yecN        | 15 | 0.139  | 0.157  | 0.122  | 0.075  | 0.247  | -0.195 | 0.143  | 0.232  | 1.055  | 0.024  | -0.041 | 0.171  | 0.173  | 0.200  | 0.246  | 0.238  | 0.279  | 0.327  | 0.209  | 0.217  | 0.245  | 0.268  |  | 1 |
| JW1859 | b1870 | yecO        | 15 | 0.315  | 0.069  | 0.010  | -0.094 | 0.096  | -0.105 | -0.032 | 0.021  | 0.801  | -0.032 | -0.049 | 0.085  | -0.016 | 0.051  | 0.022  | 0.011  | 0.111  | 0.066  | 0.121  | 0.07   | -0.036 | 0.042  |  | 1 |
| JW1860 | b1871 | yecP        | 15 | 0.182  | -0.214 | -0.340 | -0.270 | -0.302 | -0.039 | -0.247 | -0.322 | 0.412  | 0.047  | -0.001 | 0.007  | -0.192 | -0.203 | -0.263 | -0.329 | -0.388 | -0.155 | -0.245 | -0.112 | -0.098 | -0.147 |  | 1 |
| JW1861 | b1872 | bisZ        | 2  | 0.213  | -0.083 | -0.167 | -0.052 | 0.078  | 0.009  | 0.002  | 0.038  | 0.764  | -0.123 | -0.136 | -0.049 | -0.049 | -0.026 | -0.085 | 0.035  | 0.011  | -0.003 | -0.049 | 0.187  | -0.099 | -0.028 |  | 1 |
| JW1862 | b1873 | torY / yecK | 6  | -0.108 | -0.201 | -0.236 | -0.383 | -0.252 | -0.254 | -0.245 | -0.300 | 0.724  | -0.092 | -0.187 | -0.047 | -0.173 | -0.148 | -0.093 | -0.207 | -0.211 | -0.082 | -0.095 | -0.037 | -0.184 | -0.115 |  | 1 |
| JW1863 | b1874 | cutC        | 14 | 0.193  | 0.163  | 0.124  | 0.120  | 0.195  | -0.194 | 0.148  | 0.114  | 0.766  | 0.008  | -0.052 | -0.050 | 0.147  | 0.152  | 0.061  | 0.139  | 0.100  | 0.075  | 0.240  | 0.216  | 0.092  | 0.145  |  | 1 |
| JW1865 | b1876 | argS        | 12 | 0.121  | 0.102  | 0.081  | -0.183 | -0.391 | -0.047 | 0.086  | -0.406 | 0.366  | 0.058  | -0.015 | -0.115 | 0.194  | 0.054  | 0.035  | -0.391 | -0.403 | -0.437 | 0.199  | 0.111  | 0.000  | 0.052  |  | 1 |
| JW1866 | b1877 | yecT        | 15 | -0.075 | 0.165  | 0.005  | -1.171 | -6.289 | -0.069 | 0.161  | -6.098 | -4.338 | -0.023 | -0.017 | -0.442 | 0.064  | 0.061  | 0.145  | -5.994 | -4.831 | -5.491 | 0.085  | -0.111 | -0.473 | -0.509 |  | 1 |
| JW1867 | b1878 | flhE        | 3  | 0.157  | 0.124  | 0.122  | -0.241 | -0.750 | -0.365 | 0.001  | -0.651 | 0.103  | -0.192 | -0.056 | -0.248 | 0.103  | 0.091  | 0.044  | -0.440 | -0.696 | -0.685 | 0.102  | 0.017  | -0.287 | -3.130 |  | 1 |
| JW1868 | b1879 | flhA        | 3  | -0.120 | 0.003  | 0.064  | 0.039  | -0.158 | -3.772 | -0.015 | -0.137 | 0.651  | 0.047  | 0.056  | 0.071  | 0.072  | -0.134 | -0.059 | -0.056 | -0.132 | -0.206 | 0.133  | 0.268  | -0.137 | -0.886 |  | 1 |
| JW1869 | b1880 | flhB        | 3  | 0.157  | 0.138  | 0.171  | 0.054  | -0.098 | -6.477 | -0.002 | 0.025  | 0.601  | -0.091 | -0.123 | -0.026 | 0.151  | 0.117  | 0.037  | -0.087 | -0.082 | -0.092 | 0.183  | -0.019 | -0.089 | -0.057 |  |   |





|        |       |             |    |         |         |         |         |         |         |         |         |         |         |         |         |         |         |         |         |         |         |         |         |         |         |         |   |   |
|--------|-------|-------------|----|---------|---------|---------|---------|---------|---------|---------|---------|---------|---------|---------|---------|---------|---------|---------|---------|---------|---------|---------|---------|---------|---------|---------|---|---|
| JW2017 | b2032 | yefI        | 15 | -6.747  | -6.682  | -7.891  | -7.218  | -6.948  | -6.832  | -5.478  | -7.078  | -6.544  | -6.619  | -6.519  | -6.475  | -7.398  | -7.364  | -6.419  | -6.972  | -6.883  | -7.220  | -6.232  | -6.927  | -6.861  | -6.791  | 1       | 1 |   |
| JW2018 | b2033 | yfbJ        | 6  | -4.550  | -4.641  | -5.477  | -5.108  | -4.805  | -5.007  | -4.433  | -4.554  | -4.786  | -4.397  | -4.526  | -4.625  | -5.375  | -4.970  | -4.439  | -4.707  | -4.494  | -4.564  | -4.298  | -5.098  | -4.892  | -4.649  | 1       | 1 |   |
| JW2019 | b2034 | yefG        | 15 | -5.479  | -5.372  | -6.042  | -6.083  | -6.290  | -5.772  | -5.256  | -5.938  | -6.536  | -5.402  | -5.436  | -5.855  | -6.597  | -5.915  | -6.153  | -6.435  | -6.248  | -6.219  | -5.144  | -6.528  | -6.317  | -5.920  | 1       | 1 |   |
| JW2020 | b2035 | rfc         | 3  | -6.262  | -6.093  | -7.138  | -6.816  | -6.322  | -6.632  | -5.716  | -6.366  | -6.103  | -6.261  | -5.992  | -6.102  | -6.690  | -6.444  | -6.243  | -6.359  | -6.656  | -6.814  | -6.147  | -6.747  | -6.817  | -6.409  | 1       | 1 |   |
| JW2021 | b2036 | glf         | 6  | -7.030  | -6.430  | -7.755  | -7.316  | -7.104  | -7.238  | -6.612  | -6.985  | -6.712  | -6.921  | -6.527  | -6.802  | -7.086  | -6.993  | -6.851  | -7.177  | -7.070  | -7.195  | -6.508  | -7.083  | -7.361  | -7.415  | 1       | 1 |   |
| JW2022 | b2037 | rfbX        | 3  | -2.807  | -2.200  | -2.285  | -2.415  | -2.531  | -2.449  | -2.357  | -2.240  | -2.465  | -2.093  | -2.171  | -2.262  | -2.572  | -2.462  | -2.583  | -2.402  | -2.583  | -2.619  | -2.645  | -2.211  | -2.645  | -2.617  | 1       | 1 |   |
| JW2023 | b2038 | rfbC        | 5  | -6.081  | -5.214  | -6.624  | -6.478  | -6.274  | -6.187  | -5.724  | -5.739  | -5.671  | -5.872  | -5.134  | -5.809  | -6.183  | -6.248  | -5.651  | -5.698  | -6.210  | -5.973  | -5.481  | -5.835  | -6.628  | -6.651  | 1       | 1 |   |
| JW2024 | b2039 | rfbA        | 5  | -5.057  | -1.385  | -6.635  | -6.037  | -5.522  | -5.565  | -5.069  | -0.825  | -4.000  | -5.056  | -0.944  | -5.146  | -6.138  | -5.333  | -5.643  | -2.331  | -5.081  | -2.977  | -4.738  | -2.952  | -6.231  | -6.008  | 1       | 1 |   |
| JW2025 | b2040 | rfbD        | 5  | -3.285  | -0.160  | -5.888  | -4.183  | -3.199  | -3.491  | -3.339  | -0.573  | -3.215  | -3.216  | -0.714  | -3.300  | -4.247  | -3.577  | -4.113  | -1.328  | -3.035  | -2.007  | -2.916  | -1.820  | -5.134  | -4.120  | 1       | 1 |   |
| JW2026 | b2041 | rfbB        | 5  | -5.101  | -0.501  | -6.766  | -6.302  | -6.010  | -0.707  | -4.716  | 0.020   | -4.224  | -5.457  | -0.148  | -5.098  | -5.887  | -5.999  | -5.185  | -0.593  | -5.269  | -1.189  | -0.560  | -1.325  | -5.573  | -6.357  | 1       | 1 |   |
| JW2027 | b2042 | galF        | 5  | 0.048   | -0.247  | -3.225  | -3.232  | -0.098  | -0.402  | -0.229  | -0.007  | -0.230  | -0.398  | -0.189  | -0.175  | -1.772  | -1.681  | -0.434  | -0.278  | -0.006  | 0.024   | -0.292  | 0.320   | -1.096  | -2.656  | 1       | 1 |   |
| JW2028 | b2043 | wcaM        | 1  | -0.197  | -0.361  | -7.854  | -4.893  | -0.201  | -0.563  | -0.374  | -0.086  | -0.433  | -0.547  | -0.604  | -0.662  | -4.669  | -5.271  | -2.795  | -0.159  | -0.383  | -0.337  | -0.578  | -0.145  | -6.482  | -7.853  | 1       | 1 |   |
| JW2029 | b2044 | wcaL        | 1  | -0.137  | -0.352  | -7.684  | -4.823  | -0.145  | -0.614  | -0.319  | -0.131  | -0.298  | -0.511  | -0.483  | -0.703  | -3.607  | -4.029  | -6.344  | -0.119  | -0.315  | -0.247  | -0.398  | -0.334  | -7.028  | -7.449  | 1       | 1 |   |
| JW2030 | b2045 | wcaK        | 1  | -0.442  | -0.307  | -7.757  | -4.559  | -0.021  | -0.515  | -0.322  | 0.161   | -0.186  | -0.534  | -0.442  | -0.343  | -3.236  | -3.679  | -6.578  | -0.082  | -0.086  | -0.247  | -0.127  | -0.234  | -7.200  | -6.004  | 1       | 1 |   |
| JW2031 | b2046 | wzcJ        | 7  | 0.094   | -0.353  | -7.520  | -4.743  | -0.214  | -0.433  | -0.286  | 0.060   | -0.157  | -0.456  | -0.362  | -0.349  | -2.418  | -2.681  | -7.212  | -0.046  | -0.196  | -0.147  | -0.121  | -0.194  | -6.798  | -6.722  | 1       | 1 |   |
| JW2032 | b2047 | wcaJ        | 15 | 0.241   | -0.119  | -4.765  | -3.883  | 0.044   | -0.328  | -0.098  | 0.224   | -0.004  | -0.099  | -0.075  | -0.264  | -2.615  | -2.325  | -4.755  | 0.081   | 0.119   | 0.123   | -0.130  | 0.121   | -6.636  | -4.750  | 1       | 1 |   |
| JW2033 | b2048 | cpsG / manB | 5  | 0.781   | -0.048  | -7.647  | -0.948  | 0.135   | -0.358  | -0.158  | -0.075  | -0.217  | 0.527   | -0.382  | -0.482  | -2.524  | -2.836  | -6.888  | -0.046  | -0.285  | -0.365  | -0.072  | -0.158  | -7.282  | -0.319  | 1       | 1 |   |
| JW2034 | b2049 | cpsB / manC | 5  | -0.220  | -0.229  | -8.308  | -3.441  | 0.011   | -0.344  | -0.196  | 0.079   | -0.150  | 0.135   | -0.353  | -0.173  | -2.896  | -0.825  | -7.028  | -0.219  | -0.193  | -0.213  | -0.151  | -0.058  | -7.717  | -0.212  | 1       | 1 |   |
| JW2035 | b2050 | wcaL        | 14 | 0.042   | -0.052  | -7.135  | -4.444  | 0.175   | -0.229  | -0.066  | 0.092   | -0.070  | -0.235  | -0.225  | -0.086  | -2.934  | -0.031  | -6.179  | -0.098  | -0.007  | -0.171  | 0.159   | -0.006  | -6.677  | -0.136  | 1       | 1 |   |
| JW2036 | b2051 | wcaH        | 14 | 0.197   | -0.069  | -5.978  | -0.882  | 0.056   | -0.307  | -0.142  | -0.001  | -0.098  | -0.236  | -0.204  | -0.297  | -2.033  | -0.158  | -3.762  | -0.030  | -0.069  | 0.084   | -0.069  | -0.106  | -5.917  | -0.199  | 1       | 1 |   |
| JW2037 | b2052 | wcaG / fcl  | 5  | 0.124   | 0.007   | -4.877  | -0.822  | 0.101   | -0.154  | -0.030  | 0.122   | -0.040  | 0.040   | -0.201  | -0.435  | -2.039  | -0.204  | -5.783  | 0.096   | 0.041   | -0.042  | 0.034   | -0.036  | -7.257  | -0.072  | 1       | 1 |   |
| JW2038 | b2053 | gmd         | 5  | 0.077   | 0.117   | -4.064  | -0.760  | 0.221   | -0.061  | 0.064   | 0.211   | 0.078   | 0.042   | -0.132  | -0.325  | -1.575  | -0.119  | -6.026  | 0.182   | 0.055   | 0.100   | 0.028   | 0.182   | -7.726  | 0.080   | 1       | 1 |   |
| JW2039 | b2054 | wcaF        | 6  | -0.096  | 0.134   | -3.940  | -0.551  | 0.218   | -0.225  | -0.035  | 0.200   | 0.088   | 0.015   | 0.061   | -0.012  | -0.036  | -0.114  | -1.378  | 0.146   | 0.104   | 0.123   | 0.059   | 0.195   | -5.361  | 0.056   | 1       | 1 |   |
| JW2040 | b2055 | wcaE        | 14 | 0.014   | 0.133   | -3.937  | -0.461  | 0.103   | -0.269  | -0.235  | 0.048   | 0.000   | 0.088   | -0.126  | -0.136  | -0.116  | 0.057   | -0.139  | -0.038  | -0.109  | -0.068  | 0.076   | -1.293  | -7.162  | 0.112   | 1       | 1 |   |
| JW2041 | b2056 | wcaD        | 2  | 0.146   | 0.024   | -2.308  | -0.385  | 0.042   | -0.299  | -0.087  | 0.136   | 0.001   | 0.094   | -0.031  | -0.131  | 0.057   | 0.130   | 0.142   | 0.097   | 0.022   | 0.044   | -0.212  | -0.565  | -6.993  | -0.095  | 1       | 1 |   |
| JW2042 | b2057 | wcaC        | 2  | -0.019  | -0.242  | -2.769  | -0.527  | 0.012   | -0.454  | -0.169  | -0.182  | -0.147  | 0.112   | -0.376  | -0.138  | 0.057   | 0.164   | -0.064  | -0.095  | -0.113  | -0.149  | -0.081  | -0.141  | -2.964  | -0.142  | 1       | 1 |   |
| JW2043 | b2058 | wcaB        | 1  | -0.058  | 0.052   | -2.749  | -0.456  | 0.303   | -0.316  | -0.112  | 0.154   | 0.030   | -0.098  | -0.417  | -0.571  | -0.107  | -0.070  | -0.323  | -0.039  | -0.244  | -0.088  | -0.261  | -3.533  | -0.001  | 1       | 1       |   |   |
| JW2044 | b2059 | wcaA        | 14 | -0.010  | -0.025  | -1.585  | -0.484  | -0.031  | -0.278  | -0.207  | -0.216  | -0.270  | 0.038   | -0.299  | -0.056  | -0.096  | 0.033   | -0.043  | -0.130  | -0.235  | -0.097  | -0.278  | -0.174  | -2.457  | -0.025  | 1       | 1 |   |
| JW2045 | b2060 | (yccC)      | 15 | 0.001   | -0.103  | -3.128  | -0.643  | 0.001   | -0.543  | -0.219  | -0.112  | -0.292  | 0.104   | -0.217  | -0.323  | -0.004  | -0.188  | 0.044   | -0.040  | -0.134  | -0.084  | -0.156  | -0.198  | -7.782  | -0.319  | 1       | 1 |   |
| JW2046 | b2061 | wzb         | 14 | 0.273   | 0.133   | 0.026   | 0.146   | 0.210   | -0.132  | 0.114   | 0.233   | 0.132   | 0.076   | -0.083  | -0.176  | 0.093   | 0.145   | 0.096   | 0.226   | 0.218   | 0.276   | 0.176   | 0.038   | -6.792  | 0.019   | 1       | 1 |   |
| JW2047 | b2062 | wza         | 15 | Invalid | 1 | 1 |
| JW2048 | b2063 | yegH        | 15 | 0.136   | -0.006  | 0.035   | 0.140   | 0.301   | -0.179  | -0.069  | 0.039   | 0.112   | 0.054   | -0.095  | -0.029  | -0.047  | -0.041  | 0.115   | -0.002  | 0.016   | 0.037   | -0.009  | 0.062   | -1.322  | -0.033  | 1       | 1 |   |
| JW2049 | b2064 | asmA        | 15 | 0.363   | 0.039   | 0.064   | 0.208   | 0.295   | -0.071  | 0.000   | 0.206   | 0.096   | 0.035   | -0.316  | 0.050   | 0.122   | 0.034   | 0.097   | 0.095   | 0.179   | 0.186   | 0.090   | 0.188   | -2.800  | 0.066   | 1       | 1 |   |
| JW2050 | b2065 | dcd         | 8  | 0.297   | 0.080   | 0.170   | 0.139   | 0.250   | -0.045  | 0.071   | 0.094   | -0.005  | -0.027  | -0.122  | -0.072  | 0.052   | 0.038   | 0.028   | -0.005  | 0.040   | 0.088   | 0.233   | 0.158   | -0.792  | 0.036   | 1       | 1 |   |
| JW2051 | b2066 | udk         | 8  | -0.002  | 0.070   | 0.152   | 0.224   | 0.351   | -0.179  | 0.006   | 0.241   | 0.315   | 0.063   | 0.054   | 0.061   | 0.170   | -0.149  | 0.078   | 0.210   | 0.218   | 0.376   | 0.153   | 0.241   | -0.635  | 0.096   | 1       | 1 |   |
| JW2052 | b2067 | yegE        | 15 | 0.028   | -0.040  | -0.078  | 0.028   | 0.066   | -0.403  | -0.158  | 0.068   | 0.028   | 0.063   | -0.120  | -0.227  | 0.067   | -0.031  | 0.082   | 0.038   | 0.050   | 0.007   | -0.009  | 0.068   | 0.116   | 0.011   | 1       | 1 |   |
| JW2053 | b2068 | alkA        | 10 | 0.623   | 0.448   | 0.541   | 0.593   | 0.414   | 0.082   | 0.348   | 0.596   | 0.456   | 0.409   | 0.306   | 0.166   | 0.292   | 0.166   | 0.294   | 0.159   | 0.113   | 0.348   | 0.371   | 0.147   | 0.363   | 0.276   | 1       | 1 |   |
| JW2054 | b2069 | yegD        | 15 | 0.278   | -0.026  | 0.029   | 0.051   | 0.046   | -0.158  | -0.087  | 0.004   | -0.053  | -0.117  | -0.063  | -0.227  | 0.137   | -0.039  | -0.113  | -0.037  | 0.056   | -0.072  | 0.085   | 0.025   | -0.026  | -0.004  | 1       | 1 |   |
| JW2055 | b2070 | 356#6       | 15 | -0.227  | -0.244  | -0.271  | -0.281  | -0.354  | -0.423  | -0.201  | -0.356  | -0.341  | -0.215  | 0.032   | -0.374  | -0.016  | -0.176  | -0.128  | -0.323  | -0.295  | -0.357  | -0.272  | -0.215  | -0.301  | -0.177  | 1       | 1 |   |
| JW2056 | b2071 | 356#7       | 15 | -3.780  | -3.473  | -4.113  | -4.110  | -4.226  | -4.545  | -3.535  | -4.035  | -3.729  | 0.132   | 0.036   | -0.127  | -3.899  | -3.469  | -3.728  | -4.406  | -3.787  | -3.971  | -3.361  | -4.045  | 0.046   | -4.055  | 1       | 1 |   |
| JW2057 | b2072 | 356#8       | 15 | -0.928  | -0.746  | -0.912  | -0.699  | -0.400  | -0.989  | -0.734  | -0.634  | -0.372  | 0.046   | -0.038  | 0.137   | -0.464  | -0.704  | -0.654  | -0.529  | -0.477  | -0.499  | -0.520  | -0.656  | -0.465  | -0.455  | 1       | 1 |   |
| JW2058 | b2073 | 356#9       | 15 | -0.171  | -0.146  | -0.239  | -0.365  | -0.614  | -0.771  | -0.165  | -0.661  | -0.534  | 0.036   | -0.002  | 0.026   | -0.420  | -0.406  | -0.582  | -0.496  | -0.452  | -0.477  | -0.228  | -0.096  | -0.247  | -0.324  | 1       | 1 |   |
| JW2059 | b2074 | yegM        | 15 | 0.221   | -0.016  | -0.065  | -0.010  | 0.063   | -0.209  | 0.023   | 0.000   | 0.026   | 0.051   | 0.018   | -0.162  | 0.073   | 0.012   | -0.031  | 0.011   | 0.001   | 0.050   | 0.111   | -0.492  | -0.071  | -0.090  | 1       | 1 |   |
| JW2060 | b2075 | yegN        | 15 | 0.015   | 0.133   | 0.053   | -0.106  | -0.042  | -0.094  | 0.040   | -0.139  | -0.102  | -0.241  | -0.105  | -0.254  | 0.162   | -0.075  | -0.074  | -0.559  | -0.106  | -0.110  | 0.139   | 0.246   | -0.402  | -0.006  | 1       | 1 |   |
| JW2061 | b2076 | yegO        | 15 | 0.280   | -0.170  | -0.182  | -0.239  | -0.316  | -0.248  | -0.125  | -0.477  | -0.340  | -0.329  | -0.297  | -0.141  | -0.026  | 0.028   | 0.025   | -1.233  | -0.418  | -0.566  | -0.039  | -0.146  | -0.063  | -0.017  | 1       | 1 |   |
| JW2062 | b2077 | yegB        | 15 | 0.099   | -0.023  | -0.108  | -0.132  | -0.131  | -0.015  | 0.030   | -0.148  | -0.154  | 0.031   | -0.226  | -0.168  | 0.132   | 0.011   | 0.050   | -0.054  | -0.040  | -0.110  | 0.037   | 0.148   | -0.098  | 0.025   | 1       | 1 |   |
| JW2063 | b2078 |             |    |         |         |         |         |         |         |         |         |         |         |         |         |         |         |         |         |         |         |         |         |         |         |         |   |   |

|        |       |        |    |        |        |        |        |        |        |        |        |        |        |        |        |        |        |        |        |        |        |        |        |        |        |  |   |
|--------|-------|--------|----|--------|--------|--------|--------|--------|--------|--------|--------|--------|--------|--------|--------|--------|--------|--------|--------|--------|--------|--------|--------|--------|--------|--|---|
| JW2111 | b2123 | yehR   | 15 | 0.381  | 0.177  | -0.172 | 0.044  | 0.230  | 0.026  | 0.009  | 0.149  | 0.079  | -0.078 | 0.086  | 0.037  | 0.110  | 0.152  | 0.105  | 0.131  | 0.100  | 0.117  | -0.088 | 0.161  | 0.036  | 0.048  |  |   |
| JW2112 | b2124 | yehS   | 15 | 0.047  | 0.095  | 0.043  | 0.001  | 0.086  | -0.148 | 0.077  | 0.061  | 0.120  | -0.056 | -0.052 | 0.104  | 0.009  | 0.045  | 0.086  | 0.044  | 0.193  | 0.117  | 0.175  | 0.046  | 0.092  | 0.051  |  | 1 |
| JW2113 | b2125 | yehT   | 15 | 0.111  | 0.173  | -0.023 | 0.106  | 0.175  | -0.010 | 0.156  | 0.211  | 0.085  | -0.002 | -0.049 | 0.217  | 0.080  | 0.238  | 0.186  | -0.023 | 0.079  | 0.082  | 0.053  | 0.241  | 0.238  | 0.261  |  | 1 |
| JW2114 | b2126 | yehU   | 15 | 0.191  | -0.063 | -0.156 | 0.035  | 0.199  | 0.081  | -0.064 | 0.139  | -0.049 | 0.009  | -0.064 | -0.022 | 0.015  | 0.013  | -0.061 | -0.023 | -0.079 | 0.008  | -0.004 | -0.019 | -0.105 | -0.072 |  | 1 |
| JW2115 | b2127 | yehV   | 9  | 0.113  | -0.008 | -0.034 | -0.045 | -0.160 | -0.047 | 0.019  | -0.219 | -0.219 | 0.019  | -0.105 | -0.186 | -0.021 | 0.079  | 0.011  | -0.159 | -0.255 | -0.147 | 0.003  | 0.015  | -0.075 | -0.038 |  | 1 |
| JW2116 | b2128 | yehW   | 15 | 0.111  | -0.005 | 0.110  | -0.010 | -0.140 | -0.169 | 0.091  | -0.084 | -0.169 | -0.053 | -0.081 | -0.202 | 0.097  | 0.111  | 0.067  | -0.056 | 0.148  | 0.085  | -0.001 | -0.025 | 0.012  | -0.038 |  | 1 |
| JW2117 | b2129 | yehX   | 11 | -0.030 | -0.204 | -0.195 | -0.335 | -0.554 | -0.148 | -0.214 | -0.528 | -0.483 | -0.050 | -0.025 | -0.521 | -0.187 | -0.298 | -0.242 | -0.766 | -0.663 | -0.655 | -0.199 | -0.026 | -0.127 | -0.113 |  | 1 |
| JW2119 | b2131 | yehZ   | 15 | -0.330 | 0.106  | 0.281  | -0.041 | -0.434 | -0.052 | -0.058 | -0.499 | -0.398 | -0.018 | -0.392 | 0.048  | 0.113  | 0.102  | 0.028  | -0.439 | -0.603 | -0.246 | 0.171  | -0.007 | -0.473 | -0.411 |  | 1 |
| JW2120 | b2132 | bgfX   | 6  | 0.116  | 0.180  | 0.255  | 0.259  | 0.177  | -0.123 | -0.019 | 0.146  | 0.063  | -0.075 | 0.022  | 0.122  | 0.226  | 0.165  | 0.062  | 0.138  | 0.171  | 0.024  | 0.098  | 0.125  | 0.034  | -0.012 |  | 1 |
| JW2121 | b2133 | dld    | 6  | 0.106  | 0.069  | 0.161  | 0.157  | 0.055  | 0.027  | -0.073 | 0.089  | 0.002  | 0.065  | 0.078  | 0.065  | 0.084  | 0.085  | 0.065  | 0.089  | 0.021  | 0.028  | 0.058  | 0.105  | 0.016  | -0.061 |  | 1 |
| JW2122 | b2134 | pbpG   | 3  | -0.058 | 0.078  | 0.064  | -0.053 | -0.230 | -0.447 | -0.022 | -0.257 | -0.115 | -0.034 | -0.064 | -0.195 | -0.200 | -0.146 | -0.169 | -0.099 | -0.284 | -0.173 | -0.034 | 0.033  | -0.090 | -0.255 |  | 1 |
| JW2123 | b2135 | yohC   | 15 | -0.024 | -0.242 | 0.018  | -0.054 | -0.030 | -0.334 | -0.105 | 0.008  | 0.071  | 0.040  | 0.016  | 0.078  | -0.075 | -0.106 | 0.026  | 0.035  | 0.108  | 0.073  | -0.012 | 0.093  | -0.048 | -0.017 |  | 1 |
| JW2124 | b2136 | yohD   | 15 | -0.044 | -0.066 | -0.083 | -0.176 | -0.258 | -0.315 | -0.173 | -0.325 | -0.265 | -0.048 | -0.193 | -0.167 | -0.281 | -0.200 | -0.226 | -0.343 | -0.294 | -0.347 | -0.035 | -0.151 | -0.187 | -0.199 |  | 1 |
| JW2125 | b2137 | yohF   | 15 | 0.070  | -0.200 | -0.175 | -0.148 | -0.119 | -0.433 | -0.253 | -0.233 | -0.187 | -0.001 | 0.004  | -0.265 | -0.037 | -0.024 | -0.054 | -0.221 | -0.239 | -0.158 | -0.200 | -0.015 | -0.161 | -0.321 |  | 1 |
| JW2126 | b2138 | yohG   | 15 | 0.280  | 0.115  | 0.228  | 0.064  | 0.108  | -0.113 | 0.065  | -0.053 | 0.036  | -0.008 | -0.021 | -0.062 | 0.129  | 0.109  | -0.003 | 0.015  | 0.093  | -0.010 | 0.176  | 0.027  | -0.025 | 0.011  |  | 1 |
| JW2128 | b2140 | yohL   | 15 | 0.201  | 0.020  | 0.236  | 0.018  | -0.082 | -0.024 | 0.082  | -0.102 | -0.097 | 0.062  | 0.047  | 0.002  | 0.137  | 0.198  | 0.094  | -0.052 | -0.166 | -0.015 | 0.091  | 0.199  | -0.043 | -0.110 |  | 1 |
| JW2129 | b2141 | yohJ   | 15 | 0.251  | 0.121  | 0.122  | -0.010 | 0.003  | -0.278 | 0.119  | 0.070  | 0.136  | 0.224  | 0.039  | 0.025  | 0.148  | 0.191  | 0.108  | 0.421  | 0.316  | 0.336  | 0.011  | 0.118  | 0.018  | 0.051  |  | 1 |
| JW2130 | b2142 | yohK   | 15 | 0.206  | 0.008  | 0.077  | -0.043 | 0.017  | -0.101 | 0.099  | -0.036 | 0.020  | 0.024  | 0.015  | -0.091 | 0.008  | 0.101  | 0.048  | 0.043  | 0.058  | 0.005  | -0.022 | 0.120  | 0.021  | -0.027 |  | 1 |
| JW2131 | b2143 | cdt    | 8  | 0.202  | 0.125  | 0.182  | -0.104 | -0.090 | -0.183 | 0.048  | -0.079 | -0.012 | 0.055  | 0.027  | -0.153 | 0.101  | 0.030  | 0.083  | -0.007 | 0.091  | 0.060  | 0.105  | -0.087 | -0.005 | 0.011  |  | 1 |
| JW2132 | b2144 | sanA   | 14 | -0.185 | -0.008 | 0.070  | -0.113 | -0.313 | -0.228 | -0.115 | -0.107 | -0.227 | 0.049  | -0.039 | 0.093  | -0.214 | -0.064 | -0.078 | -0.102 | -0.116 | -0.115 | -0.034 | -0.102 | -0.036 | -0.126 |  | 1 |
| JW2133 | b2146 | (gltD) | 15 | 0.044  | 0.048  | 0.069  | -0.086 | -0.254 | -0.139 | -0.163 | -0.113 | -0.198 | 0.080  | 0.106  | 0.107  | 0.026  | -0.055 | -0.085 | -0.146 | 0.025  | -0.019 | -0.035 | 0.014  | -0.054 | -0.080 |  | 1 |
| JW2134 | b2147 | yeiA   | 15 | 0.176  | 0.108  | 0.220  | 0.079  | -0.039 | -0.094 | 0.041  | -0.060 | -0.053 | -0.016 | 0.017  | -0.068 | 0.122  | 0.197  | 0.117  | -0.013 | -0.044 | -0.017 | 0.095  | -0.015 | -0.180 | -0.209 |  | 1 |
| JW2135 | b2148 | mgfC   | 11 | 0.205  | 0.141  | 0.242  | 0.014  | -0.168 | -0.083 | 0.164  | -0.120 | -0.118 | 0.012  | 0.019  | 0.064  | 0.144  | 0.234  | 0.163  | -0.168 | -0.231 | -0.159 | 0.124  | 0.162  | -0.005 | 0.043  |  | 1 |
| JW2136 | b2149 | mgfA   | 11 | 0.127  | 0.176  | 0.150  | -0.090 | -0.140 | -0.223 | 0.151  | -0.091 | -0.081 | 0.050  | 0.073  | -0.089 | 0.081  | 0.182  | 0.116  | -0.063 | -0.052 | -0.056 | 0.054  | 0.160  | -0.009 | 0.027  |  | 1 |
| JW2137 | b2150 | mgfB   | 11 | 0.186  | 0.123  | 0.134  | -0.027 | 0.068  | -0.281 | 0.032  | 0.084  | 0.178  | 0.021  | 0.085  | -0.111 | 0.100  | 0.112  | 0.071  | 0.184  | 0.044  | 0.206  | 0.080  | 0.162  | -1.093 | 0.045  |  | 1 |
| JW2138 | b2151 | galS   | 6  | 0.063  | 0.066  | 0.180  | 0.012  | 0.114  | -0.237 | 0.032  | 0.182  | 0.185  | 0.009  | -0.022 | 0.067  | -0.033 | 0.034  | 0.069  | 0.109  | 0.198  | 0.245  | 0.130  | 0.135  | -2.041 | 0.049  |  | 1 |
| JW2139 | b2152 | yeiB   | 15 | -0.026 | -0.074 | -0.001 | -0.103 | -0.090 | -0.141 | -0.027 | -0.112 | -0.108 | -0.058 | -0.035 | -0.037 | 0.002  | 0.035  | -0.019 | -0.125 | -0.101 | 0.013  | -0.025 | -0.049 | -0.115 | -0.070 |  | 1 |
| JW2140 | b2153 | fofE   | 2  | 0.126  | 0.059  | -0.053 | -0.124 | -0.094 | -0.190 | -0.061 | -0.107 | -0.112 | -0.070 | -0.158 | -0.138 | -0.110 | -0.173 | -0.214 | -0.079 | -0.135 | -0.109 | 0.013  | -0.060 | -0.199 | -0.166 |  | 1 |
| JW2141 | b2154 | yeiG   | 14 | -0.071 | 0.039  | -0.096 | -0.234 | -0.313 | -0.138 | -0.067 | -0.452 | -0.362 | -0.059 | -0.166 | -0.242 | -0.402 | -0.219 | -0.305 | -0.355 | -0.420 | -0.447 | -0.038 | -0.415 | -0.436 | -0.219 |  | 1 |
| JW2142 | b2155 | cirA   | 11 | 0.069  | 0.031  | 0.106  | -0.006 | 0.065  | -0.079 | 0.088  | 0.057  | 0.083  | 0.076  | 0.024  | -0.107 | -0.005 | 0.061  | -0.015 | 0.167  | 0.102  | 0.157  | 0.014  | 0.061  | -0.132 | 0.093  |  | 1 |
| JW2143 | b2156 | lysP   | 11 | 0.126  | 0.106  | 0.153  | -0.040 | 0.063  | -0.130 | 0.146  | 0.043  | 0.149  | 0.066  | 0.057  | -0.108 | 0.090  | 0.122  | 0.076  | 0.187  | 0.201  | 0.214  | 0.043  | 0.262  | 0.172  | 0.159  |  | 1 |
| JW2144 | b2157 | yeiE   | 9  | -0.077 | -0.010 | 0.021  | -0.001 | 0.005  | -0.194 | -0.178 | 0.000  | 0.060  | 0.012  | -0.052 | 0.051  | -0.153 | -0.040 | -0.069 | 0.008  | 0.053  | 0.090  | -0.080 | -0.007 | -0.003 | -0.054 |  | 1 |
| JW2145 | b2158 | yehH   | 15 | 0.166  | 0.194  | 0.183  | 0.121  | 0.198  | -0.106 | -0.026 | 0.194  | 0.160  | 0.025  | 0.045  | 0.144  | 0.130  | 0.147  | 0.078  | 0.129  | 0.166  | 0.264  | 0.060  | 0.162  | 0.073  | 0.069  |  | 1 |
| JW2146 | b2159 | nfo    | 8  | 0.400  | 0.074  | 0.255  | 0.167  | 0.185  | -0.064 | 0.103  | 0.179  | 0.066  | -0.048 | 0.022  | 0.034  | 0.171  | 0.204  | 0.118  | 0.113  | 0.100  | 0.032  | 0.129  | 0.232  | 0.033  | 0.030  |  | 1 |
| JW2147 | b2160 | yeiL   | 15 | -0.002 | -1.867 | -2.106 | -2.142 | -1.980 | -0.172 | -1.840 | -2.213 | -1.752 | 0.141  | 0.010  | -0.118 | 0.016  | 0.088  | 0.030  | -1.969 | -1.992 | -2.088 | -1.986 | 0.005  | -0.076 | -1.954 |  | 1 |
| JW2148 | b2161 | yeiJ   | 15 | -0.227 | -0.504 | -0.718 | -0.514 | -0.337 | -0.154 | -0.498 | -3.925 | -0.197 | 0.042  | 0.064  | -0.653 | -0.337 | -0.257 | -0.327 | -3.899 | -3.738 | -3.930 | -0.669 | -0.329 | -0.272 | -0.527 |  | 1 |
| JW2149 | b2162 | yeiK   | 8  | -0.152 | -0.195 | -0.052 | -0.214 | -0.290 | -0.207 | -0.158 | -0.273 | -0.197 | 0.036  | 0.059  | -0.099 | -0.164 | -0.107 | -0.070 | -0.287 | -0.285 | -0.210 | -0.045 | -0.069 | -0.220 | -0.116 |  | 1 |
| JW2150 | b2163 | yeiL   | 15 | -0.020 | -0.176 | -0.127 | -0.174 | -0.101 | -0.149 | -0.136 | -0.247 | -0.117 | -0.031 | -0.018 | -0.173 | -0.131 | 0.021  | -0.053 | -0.253 | -0.214 | -0.213 | -0.185 | -0.123 | 0.047  | -0.033 |  | 1 |
| JW2151 | b2164 | yeiM   | 15 | -0.086 | -0.036 | -1.426 | -1.180 | -0.922 | -0.013 | -0.958 | -1.402 | -0.780 | 0.071  | 0.036  | 0.091  | -0.007 | 0.072  | -0.042 | -1.333 | -1.415 | -1.538 | -1.315 | 0.143  | -0.128 | -1.419 |  | 1 |
| JW2152 | b2165 | yeiN   | 15 | 0.021  | -0.482 | -1.125 | -1.363 | -1.475 | -0.021 | -0.893 | -1.389 | -1.289 | -0.051 | 0.005  | -0.266 | -0.391 | -0.368 | -0.492 | -1.311 | -1.348 | -1.550 | -1.077 | -0.182 | -0.456 | -1.438 |  | 1 |
| JW2153 | b2166 | yeiC   | 15 | 0.039  | 0.032  | -0.021 | -1.110 | -4.202 | -0.017 | 0.127  | -4.370 | -3.638 | 0.016  | 0.034  | -0.114 | -0.101 | 0.006  | -0.071 | -4.030 | -4.349 | -4.752 | -0.152 | 0.047  | 0.065  | -4.165 |  | 1 |
| JW2154 | b2167 | fruA   | 11 | 0.072  | -0.062 | 0.057  | 0.019  | -0.010 | -0.038 | -0.036 | 0.017  | -0.038 | 0.093  | 0.043  | 0.044  | 0.159  | 0.150  | 0.118  | 0.021  | 0.048  | 0.054  | -0.059 | 0.145  | 0.028  | -0.114 |  | 1 |
| JW2155 | b2168 | fruK   | 6  | 0.123  | 0.117  | 0.225  | 0.084  | 0.267  | -0.053 | 0.147  | 0.239  | 0.251  | 0.035  | 0.069  | -0.187 | 0.203  | 0.137  | 0.142  | 0.219  | 0.303  | 0.295  | 0.143  | 0.317  | 0.006  | 0.128  |  | 1 |
| JW2156 | b2169 | fruB   | 11 | -0.018 | -0.058 | 0.326  | 0.186  | 0.229  | -0.169 | 0.020  | 0.188  | 0.172  | 0.022  | 0.054  | 0.031  | 0.066  | 0.038  | 0.081  | 0.102  | 0.208  | 0.246  | 0.173  | 0.146  | 0.105  | 0.004  |  | 1 |
| JW2157 | b2170 | yeiO   | 15 | 0.140  | 0.086  | 0.175  | 0.175  | 0.200  | -0.090 | -0.008 | 0.236  | 0.043  | -0.024 | 0.059  | 0.036  | 0.121  | 0.078  | 0.068  | 0.065  | 0.116  | 0.133  | 0.062  | 0.111  | 0.102  | -0.026 |  | 1 |
| JW2159 | b2171 | yeiP   | 15 | 0.011  | 0.001  | -0.030 | -0.012 | 0.001  | -0.141 | -0.106 | -0.126 | -0.101 | -0.074 | -0.144 | -0.114 | -0.179 | -0.091 | -0.076 | -0.033 | -0.150 | -0.141 | -0.102 | -0.122 | -0.115 | -0.149 |  | 1 |
| JW2160 | b2172 | yeiQ   |    |        |        |        |        |        |        |        |        |        |        |        |        |        |        |        |        |        |        |        |        |        |        |  |   |





|        |       |         |    |               |               |               |               |               |        |               |               |               |        |        |               |               |               |               |               |               |               |               |               |               |               |   |
|--------|-------|---------|----|---------------|---------------|---------------|---------------|---------------|--------|---------------|---------------|---------------|--------|--------|---------------|---------------|---------------|---------------|---------------|---------------|---------------|---------------|---------------|---------------|---------------|---|
| JW2300 | b2303 | foiX    | 14 | 0.207         | 0.100         | 0.105         | 0.012         | 0.205         | -0.012 | 0.085         | -0.055        | 0.135         | -0.078 | -0.061 | 0.031         | -0.021        | 0.010         | -0.041        | 0.052         | 0.059         | 0.027         | 0.067         | 0.082         | 0.087         | 0.056         |   |
| JW2301 | b2304 | 406#7   | 15 | -0.032        | -0.179        | -0.071        | -0.184        | -0.080        | 0.028  | -0.101        | 0.018         | -0.208        | 0.011  | -0.032 | -0.167        | -0.007        | 0.013         | -0.071        | -0.118        | -0.118        | 0.033         | -0.058        | -0.171        | -0.213        | -0.191        |   |
| JW2302 | b2305 | yfcI    | 15 | 0.086         | 0.042         | 0.063         | -0.026        | 0.257         | 0.016  | 0.132         | -0.154        | 0.095         | -0.078 | -0.028 | -0.273        | 0.040         | 0.036         | 0.007         | -0.269        | -0.162        | <b>-4.979</b> | 0.081         | 0.060         | -0.177        | -0.081        | 1 |
| JW2303 | b2306 | hisP    | 11 | -0.313        | 0.082         | -0.011        | 0.022         | 0.157         | -0.034 | 0.049         | -0.079        | -0.041        | -0.138 | -0.015 | -0.278        | -0.109        | -0.032        | -0.123        | -0.219        | -0.217        | -0.305        | 0.078         | -0.005        | -0.107        | 0.049         | 1 |
| JW2304 | b2307 | hisM    | 11 | 0.004         | 0.057         | 0.140         | -0.147        | -0.253        | 0.055  | 0.180         | -0.279        | -0.312        | 0.101  | 0.023  | -0.040        | 0.056         | 0.158         | 0.056         | -0.302        | -0.235        | -0.341        | -0.044        | 0.167         | 0.132         | 0.147         | 1 |
| JW2305 | b2308 | hisQ    | 11 | 0.167         | 0.066         | -0.006        | -0.123        | -0.042        | -0.034 | 0.040         | -0.037        | -0.084        | -0.010 | -0.007 | -0.147        | 0.066         | 0.120         | 0.036         | -0.093        | -0.109        | -0.149        | -0.099        | 0.007         | -0.004        | 0.168         | 1 |
| JW2307 | b2310 | argT    | 11 | 0.019         | 0.001         | 0.112         | 0.025         | -0.061        | 0.003  | -0.026        | -0.138        | -0.204        | -0.031 | -0.015 | 0.110         | 0.035         | 0.029         | -0.020        | -0.260        | -0.163        | -0.265        | 0.003         | -0.006        | -0.018        | -0.050        | 1 |
| JW2308 | b2311 | ubiX    | 2  | 0.135         | 0.065         | 0.211         | 0.155         | 0.093         | 0.008  | 0.103         | 0.070         | -0.014        | 0.016  | 0.022  | 0.075         | 0.038         | 0.081         | 0.048         | 0.072         | 0.120         | 0.095         | 0.127         | 0.090         | 0.029         | 0.000         | 1 |
| JW2309 | b2312 | purF    | 8  | 0.056         | 0.088         | 0.273         | 0.127         | -0.030        | 0.017  | 0.126         | -0.092        | -0.098        | 0.034  | -0.006 | -0.112        | 0.184         | 0.191         | 0.106         | -0.103        | 0.001         | -0.174        | 0.150         | 0.163         | -0.078        | 0.023         | 1 |
| JW2310 | b2313 | dedE    | 14 | -0.326        | 0.000         | 0.077         | 0.132         | 0.062         | -0.153 | -0.017        | 0.131         | 0.160         | 0.117  | 0.026  | 0.154         | -0.007        | 0.050         | 0.092         | 0.155         | 0.240         | 0.241         | 0.023         | 0.185         | 0.091         | 0.076         | 1 |
| JW2311 | b2314 | dedD    | 15 | 0.136         | -0.121        | 0.041         | 0.006         | -0.076        | 0.022  | -0.064        | -0.015        | -0.249        | -0.108 | -0.002 | -0.091        | -0.042        | -0.027        | -0.113        | -0.099        | -0.194        | -0.277        | -0.044        | -0.002        | -0.162        | -0.159        | 1 |
| JW2312 | b2315 | folC    | 2  | 0.186         | 0.034         | 0.178         | 0.157         | 0.125         | 0.041  | 0.129         | 0.117         | 0.067         | 0.008  | 0.000  | -0.120        | -0.005        | -0.042        | -0.094        | 0.065         | 0.121         | 0.102         | 0.129         | 0.209         | -0.092        | -0.102        | 1 |
| JW2313 | b2316 | accD    | 7  | 0.269         | 0.061         | 0.290         | 0.190         | 0.187         | -0.135 | 0.104         | 0.074         | 0.152         | 0.004  | 0.003  | -0.191        | 0.113         | -0.036        | -0.013        | 0.164         | 0.141         | 0.165         | 0.197         | 0.169         | 0.017         | 0.003         | 1 |
| JW2314 | b2317 | dedA    | 15 | 0.019         | <b>-1.184</b> | <b>-1.219</b> | -0.328        | -0.031        | -0.090 | <b>-1.100</b> | 0.047         | 0.026         | 0.046  | 0.112  | 0.145         | -0.949        | <b>-1.065</b> | <b>-1.084</b> | 0.064         | 0.136         | 0.058         | <b>-1.089</b> | 0.187         | 0.180         | <b>-1.065</b> | 1 |
| JW2315 | b2318 | truA    | 12 | -0.267        | -0.145        | -0.161        | -0.061        | -0.310        | -0.102 | -0.319        | -0.374        | -0.469        | -0.216 | -0.143 | -0.187        | -0.377        | -0.329        | -0.375        | -0.368        | -0.444        | -0.302        | -0.365        | -0.232        | -0.314        | -0.378        | 1 |
| JW2316 | b2319 | usg1    | 1  | 0.175         | -0.029        | 0.122         | 0.186         | 0.081         | 0.061  | -0.080        | 0.104         | -0.075        | 0.065  | 0.043  | 0.109         | 0.020         | -0.012        | -0.074        | 0.104         | 0.094         | 0.086         | -0.011        | -0.002        | -0.136        | -0.137        | 1 |
| JW2317 | b2320 | pdxB    | 2  | -0.034        | -0.073        | 0.040         | 0.029         | -0.049        | 0.083  | -0.018        | -0.039        | -0.107        | -0.050 | 0.012  | -0.180        | -0.163        | -0.079        | -0.249        | -0.082        | -0.178        | -0.480        | -0.157        | -0.182        | -0.272        | -0.164        | 1 |
| JW2318 | b2321 | div     | 15 | 0.088         | 0.076         | 0.245         | 0.208         | 0.057         | -0.005 | 0.138         | 0.165         | -0.042        | 0.069  | -0.017 | -0.090        | -0.034        | -0.026        | -0.070        | 0.128         | 0.064         | 0.148         | 0.068         | 0.041         | -0.077        | -0.064        | 1 |
| JW2319 | b2322 | (yhHs)  | 15 | 0.040         | -0.147        | -0.082        | -0.025        | -0.107        | 0.093  | -0.053        | -0.140        | -0.202        | -0.093 | -0.101 | 0.039         | -0.053        | 0.009         | -0.075        | -0.194        | -0.167        | -0.165        | -0.176        | 0.011         | -0.062        | -0.174        | 1 |
| JW2320 | b2323 | fabB    | 7  | 0.011         | 0.017         | 0.055         | 0.026         | -0.002        | -0.058 | -0.068        | 0.046         | 0.009         | 0.025  | 0.015  | -0.123        | -0.067        | -0.040        | -0.094        | -0.008        | -0.010        | 0.029         | -0.090        | 0.020         | -0.040        | -0.223        | 1 |
| JW2321 | b2324 | ddpX    | 3  | -0.066        | 0.048         | 0.255         | 0.023         | -0.134        | -0.009 | 0.039         | -0.143        | -0.142        | -0.063 | 0.016  | -0.009        | 0.038         | -0.008        | 0.110         | -0.247        | -0.123        | -0.119        | 0.206         | 0.083         | -0.021        | -0.041        | 1 |
| JW2322 | b2325 | 406#3   | 15 | 0.106         | 0.049         | 0.300         | 0.098         | 0.056         | -0.098 | 0.128         | -0.280        | -0.025        | 0.046  | -0.045 | 0.023         | -0.015        | 0.116         | 0.016         | -0.077        | -0.207        | -0.278        | 0.109         | 0.049         | 0.045         | 0.012         | 1 |
| JW2323 | b2326 | yfcM    | 15 | -0.129        | -0.170        | -0.508        | -0.153        | -0.097        | 0.059  | -0.190        | -0.084        | -0.234        | -0.087 | 0.108  | -0.166        | -0.244        | -0.258        | -0.271        | -0.161        | -0.123        | -0.220        | -0.344        | -0.103        | -0.193        | -0.270        | 1 |
| JW2324 | b2327 | yfcA    | 15 | -0.170        | -0.211        | -0.177        | -0.177        | -0.277        | 0.085  | -0.093        | -0.356        | -0.314        | -0.094 | -0.012 | -0.254        | -0.112        | -0.088        | -0.193        | -0.358        | -0.109        | -0.431        | -0.267        | -0.134        | -0.176        | -0.204        | 1 |
| JW2325 | b2328 | mepA    | 3  | 0.012         | 0.062         | 0.145         | 0.131         | 0.196         | -0.006 | 0.139         | 0.044         | 0.071         | -0.059 | -0.032 | -0.136        | -0.175        | -0.154        | -0.187        | 0.154         | 0.137         | 0.060         | 0.086         | 0.172         | -0.033        | -0.007        | 1 |
| JW2326 | b2329 | aroC    | 1  | -0.200        | -0.377        | -0.296        | -0.281        | -0.351        | 0.033  | -0.271        | -0.323        | -0.384        | -0.059 | 0.016  | -0.712        | -0.354        | -0.425        | -0.441        | -0.490        | -0.405        | -0.444        | -0.346        | -0.328        | -0.401        | -0.428        | 1 |
| JW2327 | b2330 | yfcB    | 11 | -0.151        | -0.129        | -0.008        | 0.157         | 0.031         | 0.070  | -0.176        | -0.112        | -0.117        | 0.062  | 0.075  | 0.075         | 0.001         | -0.065        | -0.124        | -0.229        | -0.261        | -0.252        | -0.105        | 0.000         | -0.032        | -0.143        | 1 |
| JW2328 | b2331 | yfcN    | 15 | -0.658        | -0.130        | -0.033        | -0.156        | -0.602        | -0.022 | -0.115        | -0.500        | -0.538        | 0.063  | 0.037  | -0.034        | 0.000         | -0.010        | -0.093        | -0.705        | -0.469        | -0.471        | -0.165        | -0.026        | -0.076        | -0.150        | 1 |
| JW2329 | b2332 | 409#4   | 15 | <b>-4.831</b> | <b>-4.599</b> | <b>-4.951</b> | <b>-5.187</b> | <b>-5.350</b> | 0.070  | <b>-4.492</b> | <b>-4.870</b> | <b>-4.849</b> | 0.075  | 0.033  | <b>-4.560</b> | <b>-5.061</b> | <b>-4.623</b> | <b>-4.817</b> | <b>-5.283</b> | <b>-4.960</b> | <b>-5.242</b> | <b>-4.485</b> | <b>-5.090</b> | <b>-5.027</b> | <b>-4.871</b> | 1 |
| JW2330 | b2333 | 409#5   | 15 | <b>-5.274</b> | <b>-3.724</b> | <b>-5.178</b> | <b>-5.060</b> | <b>-5.348</b> | 0.081  | <b>-4.442</b> | <b>-3.950</b> | <b>-4.899</b> | 0.089  | 0.030  | <b>-3.880</b> | <b>-4.892</b> | <b>-4.475</b> | <b>-4.592</b> | <b>-4.115</b> | <b>-4.799</b> | <b>-5.212</b> | <b>-4.305</b> | <b>-5.090</b> | <b>-5.205</b> | <b>-5.077</b> | 1 |
| JW2331 | b2334 | 409#6   | 15 | <b>-5.261</b> | <b>-4.406</b> | <b>-5.585</b> | <b>-5.402</b> | <b>-5.635</b> | 0.051  | <b>-4.693</b> | <b>-5.304</b> | <b>-5.072</b> | 0.008  | 0.063  | <b>-4.104</b> | <b>-5.166</b> | <b>-4.831</b> | <b>-4.991</b> | <b>-5.468</b> | <b>-5.474</b> | <b>-5.520</b> | <b>-4.585</b> | <b>-5.293</b> | <b>-5.199</b> | <b>-5.300</b> | 1 |
| JW2332 | b2335 | 409#7   | 15 | <b>-5.170</b> | <b>-4.239</b> | <b>-5.136</b> | <b>-5.169</b> | <b>-4.906</b> | -0.030 | <b>-4.370</b> | <b>-5.199</b> | <b>-5.208</b> | 0.095  | 0.018  | <b>-4.226</b> | <b>-4.806</b> | <b>-4.626</b> | <b>-4.344</b> | <b>-5.189</b> | <b>-5.187</b> | <b>-5.601</b> | <b>-4.341</b> | <b>-4.993</b> | <b>-4.910</b> | <b>-4.809</b> | 1 |
| JW2333 | b2336 | yfcS    | 15 | <b>-2.912</b> | <b>-2.367</b> | <b>-1.262</b> | <b>-1.687</b> | <b>-3.241</b> | 0.146  | <b>-0.902</b> | <b>-4.309</b> | <b>-3.182</b> | 0.045  | 0.005  | <b>-2.211</b> | <b>-0.950</b> | <b>-0.944</b> | <b>-1.104</b> | <b>-4.044</b> | <b>-4.284</b> | <b>-4.690</b> | <b>-1.231</b> | <b>-1.122</b> | <b>-1.161</b> | <b>-0.938</b> | 1 |
| JW2334 | b2337 | (yfcU)  | 15 | <b>-3.122</b> | <b>-0.590</b> | <b>-0.142</b> | <b>-1.047</b> | <b>-4.291</b> | 0.119  | <b>-0.053</b> | <b>-4.467</b> | <b>-3.984</b> | 0.044  | -0.023 | <b>-0.595</b> | <b>-0.050</b> | <b>-0.014</b> | <b>-0.131</b> | <b>-4.678</b> | <b>-4.724</b> | <b>-5.079</b> | <b>-0.233</b> | <b>-0.071</b> | <b>-0.072</b> | <b>-0.123</b> | 1 |
| JW2335 | b2338 | yfcU    | 15 | <b>-3.006</b> | <b>-0.556</b> | <b>-0.667</b> | <b>-1.388</b> | <b>-4.874</b> | 0.094  | <b>-0.456</b> | <b>-5.270</b> | <b>-4.509</b> | 0.028  | -0.025 | <b>-0.529</b> | <b>-0.534</b> | <b>-0.417</b> | <b>-0.508</b> | <b>-5.129</b> | <b>-5.184</b> | <b>-5.923</b> | <b>-0.678</b> | <b>-0.585</b> | <b>-0.542</b> | <b>-0.570</b> | 1 |
| JW2336 | b2339 | 409#10  | 3  | <b>-1.611</b> | <b>-0.070</b> | 0.119         | <b>-0.559</b> | <b>-1.939</b> | 0.032  | <b>-0.104</b> | <b>-1.813</b> | <b>-1.957</b> | 0.095  | 0.114  | 0.098         | -0.007        | -0.329        | -0.352        | <b>-1.815</b> | <b>-1.689</b> | <b>-1.841</b> | -0.040        | 0.044         | 0.034         | -0.090        | 1 |
| JW2337 | b2340 | sixA    | 1  | -0.226        | 0.157         | 0.008         | 0.110         | 0.012         | 0.006  | 0.184         | 0.065         | -0.032        | 0.065  | 0.061  | -0.070        | 0.093         | 0.085         | 0.085         | 0.100         | 0.088         | 0.207         | 0.111         | 0.183         | 0.139         | 0.102         | 1 |
| JW2338 | b2341 | yfcX    | 6  | -0.283        | -0.135        | 0.070         | 0.351         | 0.087         | 0.126  | -0.147        | 0.088         | -0.113        | 0.006  | 0.079  | -0.078        | -0.065        | -0.048        | -0.043        | -0.111        | -0.180        | -0.197        | -0.047        | -0.021        | -0.117        | -0.085        | 1 |
| JW2339 | b2342 | yfcY    | 15 | -0.065        | -0.026        | 0.097         | 0.371         | 0.190         | 0.188  | -0.089        | 0.108         | -0.122        | -0.014 | 0.032  | -0.019        | 0.058         | -0.046        | -0.032        | -0.125        | -0.161        | -0.182        | -0.063        | 0.052         | -0.034        | -0.052        | 1 |
| JW2340 | b2343 | yfcZ    | 15 | 0.241         | 0.181         | 0.281         | 0.533         | 0.530         | 0.203  | 0.194         | 0.445         | 0.229         | 0.109  | 0.046  | 0.189         | 0.272         | 0.194         | 0.109         | 0.437         | 0.286         | 0.442         | 0.136         | 0.243         | 0.379         | 0.235         | 1 |
| JW2341 | b2344 | fadL    | 11 | 0.024         | 0.090         | 0.172         | -0.421        | <b>-1.225</b> | 0.269  | 0.127         | <b>-1.980</b> | <b>-2.138</b> | 0.109  | 0.116  | 0.008         | 0.203         | 0.235         | 0.123         | <b>-2.116</b> | <b>0.060</b>  | <b>-2.243</b> | 0.009         | 0.148         | 0.097         | 0.108         | 1 |
| JW2342 | b2345 | 410#5.1 | 11 | -0.578        | -0.357        | -0.361        | -0.863        | <b>-2.626</b> | 0.233  | -0.252        | <b>-2.502</b> | <b>-2.798</b> | 0.000  | -0.367 | -0.442        | -0.301        | -0.221        | -0.343        | <b>-3.150</b> | <b>-2.863</b> | <b>-2.982</b> | -0.437        | -0.295        | -0.242        | -0.367        | 1 |
| JW2343 | b2346 | vacJ    | 3  | -0.419        | -0.002        | -0.194        | -0.107        | -0.256        | -0.008 | -0.187        | -0.423        | -0.303        | -0.006 | -0.200 | -0.476        | -0.296        | -0.259        | -0.222        | -0.476        | -0.682        | -0.922        | -0.199        | -0.160        | -0.188        | -0.086        | 1 |
| JW2344 | b2347 | yfdC    | 15 | -0.300        | -0.215        | -0.273        | 0.129         | 0.186         | 0.271  | -0.226        | 0.128         | -0.128        | -0.140 | -0.053 | 0.176         | -0.233        | -0.047        | -0.064        | -0.192        | -0.211        | -0.185        | -0.386        | -0.148        | -0.290        | -0.163        | 1 |
| JW2345 | b2349 | yfdB    | 14 | KpLE1         | -0.268        | -0.298        |               |               |        |               |               |               |        |        |               |               |               |               |               |               |               |               |               |               |               |   |

|        |          |           |    |        |        |        |        |        |       |        |        |        |        |        |        |        |        |        |        |        |        |        |        |        |        |  |  |
|--------|----------|-----------|----|--------|--------|--------|--------|--------|-------|--------|--------|--------|--------|--------|--------|--------|--------|--------|--------|--------|--------|--------|--------|--------|--------|--|--|
| JW2392 | b2395    | yffA      | 15 | 0.156  | 0.160  | 0.130  | 0.185  | 0.062  | 1.153 | 0.016  | 0.336  | -0.180 | 0.033  | -0.004 | 0.128  | 0.138  | 0.122  | 0.108  | -0.172 | -0.156 | -0.081 | 0.151  | -0.005 | 0.081  | 0.154  |  |  |
| JW2393 | b2398    | yfeC      | 15 | 0.208  | 0.131  | 0.313  | 0.104  | 0.177  | 1.068 | 0.176  | 0.637  | -0.114 | 0.012  | 0.018  | 0.076  | 0.142  | 0.222  | 0.138  | 0.264  | 0.278  | 0.319  | 0.108  | -0.005 | 0.081  | 0.154  |  |  |
| JW2394 | b2399    | yfeD      | 15 | -0.143 | 0.142  | 0.349  | 0.022  | -0.182 | 0.989 | 0.114  | 0.064  | -0.250 | 0.031  | 0.035  | 0.060  | 0.106  | 0.155  | 0.110  | -0.242 | -0.236 | -0.080 | 0.206  | 0.183  | 0.236  | 0.165  |  |  |
| JW2395 | b2400    | gltX      | 12 | 0.067  | 0.044  | 0.231  | 0.132  | 0.155  | 1.074 | 0.114  | 0.394  | 0.030  | 0.040  | 0.036  | -0.047 | 0.047  | -0.001 | 0.051  | 0.051  | -0.007 | -0.012 | 0.145  | 0.152  | -0.022 | 0.121  |  |  |
| JW2396 | b2405    | xapR      | 8  | -1.855 | 0.069  | 0.008  | -0.047 | -0.170 | 0.576 | 0.022  | -0.042 | -0.190 | 0.008  | -0.075 | -0.398 | -2.248 | -1.774 | -2.017 | -0.090 | -0.255 | -0.131 | -0.069 | -2.265 | -2.236 | -2.200 |  |  |
| JW2397 | b2406    | xapB      | 8  | -6.439 | 0.633  | 0.206  | 0.097  | -0.277 | 0.950 | -0.003 | 0.047  | -0.161 | 0.072  | 0.253  | -0.092 | -6.225 | -6.153 | -6.188 | -0.189 | -0.324 | -0.370 | 0.089  | -6.313 | -6.290 | -6.506 |  |  |
| JW2398 | b2407    | xapA      | 8  | -5.443 | 0.215  | 0.273  | 0.091  | -0.409 | 1.012 | -0.036 | -0.198 | -0.504 | -0.015 | 0.147  | -0.041 | -5.320 | -5.255 | -5.222 | -0.552 | -0.580 | -0.634 | 0.108  | -5.606 | -5.612 | -5.648 |  |  |
| JW2399 | b2408    | yfeN      | 15 | -3.984 | 0.169  | 0.253  | -0.112 | -0.805 | 0.959 | 0.049  | -0.467 | -0.588 | 0.159  | 0.093  | 0.071  | -4.080 | -3.684 | -4.046 | -0.432 | -0.591 | -0.502 | 0.084  | -4.349 | -4.151 | -4.171 |  |  |
| JW2400 | b2409    | yfeR      | 9  | 0.039  | 0.090  | 0.234  | 0.178  | 0.087  | 1.065 | 0.064  | 0.380  | 0.047  | 0.111  | 0.116  | 0.110  | 0.118  | 0.185  | 0.051  | 0.120  | -0.013 | 0.172  | 0.052  | 0.041  | -0.025 | -0.024 |  |  |
| JW2401 | b2410    | yfeH      | 15 | 0.192  | 0.110  | 0.820  | 0.242  | 0.154  | 0.967 | 0.086  | 0.514  | 0.131  | 0.156  | 0.049  | 0.028  | 0.141  | 0.153  | 0.199  | 0.265  | 0.058  | 0.156  | 0.080  | 0.203  | 0.050  | 0.090  |  |  |
| JW2402 | b2411#10 |           | 15 | 0.225  | 0.063  | 0.311  | 0.034  | 0.230  | 0.878 | 0.123  | 0.265  | 0.137  | -0.053 | -0.039 | -0.280 | -0.051 | -0.192 | -0.094 | -0.057 | 0.014  | 0.165  | 0.210  | 0.200  | 0.120  | 0.085  |  |  |
| JW2403 | b2411    | lig       | 10 | 0.224  | 0.145  | 0.198  | 0.110  | 0.097  | 1.002 | 0.139  | 0.625  | -0.066 | -0.011 | -0.020 | -0.138 | 0.146  | -0.034 | 0.070  | 0.213  | -0.081 | -0.020 | 0.230  | 0.164  | 0.017  | 0.120  |  |  |
| JW2404 | b2412    | zipA      | 4  | -0.157 | -0.056 | 0.247  | 0.212  | 0.222  | 0.868 | -0.115 | 0.575  | 0.252  | 0.024  | 0.112  | 0.093  | 0.045  | -0.098 | 0.118  | 0.122  | 0.116  | 0.257  | 0.166  | 0.095  | 0.070  | 0.109  |  |  |
| JW2405 | 417#12.1 |           | 15 | 0.233  | 0.126  | 0.506  | 0.260  | 0.243  | 0.747 | 0.017  | 0.530  | 0.241  | 0.022  | 0.005  | 0.110  | -0.009 | -0.136 | 0.095  | -0.073 | 0.196  | 0.135  | 0.335  | 0.011  | 0.067  | 0.141  |  |  |
| JW2406 | b2413    | cysZ      | 11 | -0.084 | 0.060  | 0.188  | 0.179  | 0.068  | 0.960 | 0.012  | 0.303  | -0.038 | 0.061  | 0.031  | -0.152 | -0.056 | -0.083 | -0.022 | -0.104 | -0.281 | -0.081 | 0.062  | 0.059  | -0.111 | 0.002  |  |  |
| JW2407 | b2414    | cysK      | 1  | -0.055 | 0.116  | 0.161  | 0.161  | 0.088  | 0.970 | 0.037  | 0.416  | 0.096  | 0.113  | 0.055  | -0.034 | 0.094  | 0.161  | 0.174  | 0.154  | -0.110 | 0.208  | -0.001 | 0.128  | 0.106  | 0.115  |  |  |
| JW2408 | b2415    | ptsH      | 11 | -0.168 | 0.069  | 0.275  | 0.253  | 0.300  | 0.864 | 0.047  | 0.749  | 0.337  | 0.025  | 0.106  | 0.189  | 0.073  | -0.106 | 0.168  | 0.251  | 0.299  | 0.453  | 0.098  | 0.174  | 0.173  | 0.202  |  |  |
| JW2409 | b2416    | ptsL      | 11 | 0.018  | 0.059  | 0.218  | 0.267  | 0.303  | 1.030 | 0.013  | 0.611  | 0.218  | 0.088  | 0.043  | 0.137  | 0.114  | 0.143  | 0.124  | 0.145  | 0.143  | 0.253  | 0.100  | 0.158  | 0.078  | 0.099  |  |  |
| JW2410 | b2417    | gsr / crr | 11 | 0.096  | -0.097 | 0.038  | 0.082  | 0.156  | 1.001 | -0.096 | 0.228  | -0.024 | 0.116  | 0.077  | 0.115  | 0.021  | -0.026 | -0.006 | -0.054 | -0.094 | -0.026 | -0.033 | -0.034 | -0.102 | 0.015  |  |  |
| JW2411 | b2418    | pdxK      | 15 | -0.053 | -0.140 | -0.021 | -0.068 | -0.055 | 0.997 | -0.112 | 0.260  | -0.089 | 0.114  | 0.017  | 0.047  | 0.037  | -0.043 | -0.095 | 0.021  | -0.061 | 0.031  | -0.094 | -0.007 | -0.054 | -0.067 |  |  |
| JW2412 | b2419    | yfeK      | 15 | 0.076  | -0.219 | -0.211 | -0.415 | -0.625 | 0.939 | -0.180 | -0.420 | -0.658 | -0.029 | -0.018 | -0.265 | -0.268 | -0.293 | -0.284 | -0.733 | -0.713 | -0.868 | -0.259 | -0.274 | -0.298 | -0.045 |  |  |
| JW2413 | b2420    | 419#2     | 15 | -3.622 | -3.474 | -4.100 | -4.118 | -4.146 | 0.913 | -3.618 | -3.990 | -3.743 | 0.086  | 0.079  | -0.125 | 0.097  | 0.170  | 0.108  | -4.396 | -3.852 | -4.187 | -3.496 | -0.116 | -3.866 | -3.905 |  |  |
| JW2414 | b2421    | cysM      | 1  | -0.667 | -0.494 | -0.291 | -0.344 | -0.520 | 0.936 | -0.536 | -0.329 | -0.445 | -0.018 | 0.078  | -0.227 | -0.247 | -0.387 | -0.291 | -0.617 | -0.451 | -0.802 | -0.435 | -0.039 | -0.467 | -0.465 |  |  |
| JW2415 | b2422    | cysA      | 11 | 0.103  | -0.184 | 0.003  | 0.003  | -0.221 | 0.938 | -0.324 | -0.031 | -0.280 | 0.095  | 0.073  | 0.103  | -0.178 | -0.211 | -0.258 | -0.332 | -0.331 | -0.328 | -0.094 | -0.174 | -0.270 | -0.277 |  |  |
| JW2416 | b2423    | cysW      | 11 | -0.023 | -0.052 | 0.151  | 0.123  | -0.137 | 1.043 | -0.091 | 0.108  | -0.196 | 0.045  | 0.058  | -0.276 | 0.086  | 0.039  | 0.012  | -0.126 | -0.001 | -0.084 | -0.013 | -0.102 | -0.242 | -0.070 |  |  |
| JW2417 | b2424    | cysU      | 11 | -0.092 | -0.291 | 0.079  | 0.146  | 0.031  | 1.093 | -0.109 | -0.060 | -0.098 | 0.011  | 0.013  | -0.265 | 0.001  | -0.018 | -0.072 | -0.200 | -0.166 | 0.027  | -0.111 | 0.000  | -0.344 | -0.187 |  |  |
| JW2418 | b2425    | cysP      | 11 | -0.152 | -0.172 | 0.134  | 0.114  | -0.096 | 0.962 | 0.040  | 0.200  | -0.142 | 0.049  | 0.031  | -0.364 | -0.097 | -0.190 | -0.160 | -0.165 | -0.155 | -0.242 | 0.019  | -0.046 | -0.319 | -0.285 |  |  |
| JW2419 | b2426    | ucpA      | 7  | -0.044 | -0.105 | 0.094  | -0.018 | -0.199 | 0.920 | -0.027 | -0.034 | -0.196 | 0.087  | 0.020  | -0.204 | -0.090 | -0.067 | -0.064 | -0.231 | -0.280 | -0.188 | -0.005 | 0.012  | -0.129 | -0.069 |  |  |
| JW2420 | b2427    | yfeT      | 15 | -0.353 | -0.220 | 0.232  | -1.287 | -4.275 | 0.860 | -0.358 | -4.236 | -3.725 | 0.047  | 0.092  | -0.084 | -0.032 | -0.184 | 0.014  | -4.442 | -4.064 | -4.380 | -0.325 | -0.171 | -0.143 | -0.167 |  |  |
| JW2422 | b2429    | (ptbA)    | 15 | -0.118 | -0.047 | 0.118  | 0.063  | 0.000  | 0.968 | -0.062 | 0.059  | -0.034 | 0.056  | -0.020 | -0.001 | 0.027  | -0.025 | -0.016 | -0.357 | -0.171 | -0.204 | 0.041  | -0.035 | -0.013 | -0.072 |  |  |
| JW2423 | b2430    | yfeW      | 15 | -0.152 | -0.153 | 0.110  | -0.825 | -3.179 | 0.995 | -0.023 | -3.007 | -2.923 | 0.093  | 0.024  | 0.024  | 0.061  | 0.016  | -0.029 | -3.320 | -2.998 | -3.286 | -0.044 | -2.901 | -0.364 | 0.005  |  |  |
| JW2424 | b2431    | 420#4     | 15 | 0.176  | 0.165  | 0.127  | 0.089  | 0.131  | 1.049 | 0.001  | 0.329  | -0.041 | -0.062 | 0.029  | -0.274 | -0.173 | -0.137 | -0.189 | 0.062  | 0.019  | 0.054  | 0.081  | -0.080 | -0.082 | -0.176 |  |  |
| JW2425 | b2432    | 420#5     | 15 | 0.243  | -0.054 | 0.248  | 0.078  | 0.172  | 0.968 | 0.108  | 0.288  | 0.102  | 0.013  | -0.005 | -0.154 | 0.015  | -0.077 | -0.018 | -0.002 | 0.049  | -0.028 | 0.137  | -0.061 | 0.026  | -0.135 |  |  |
| JW2426 | b2433    | yfeZ      | 15 | 0.158  | -0.094 | -0.039 | -0.182 | -0.252 | 0.921 | 0.047  | -0.058 | -0.208 | 0.049  | -0.010 | -0.138 | -0.050 | -0.135 | -0.060 | -0.252 | -0.286 | -0.277 | -0.136 | 0.004  | -0.012 | -0.052 |  |  |
| JW2427 | b2434    | 420#7     | 15 | -0.402 | 0.006  | 0.212  | -0.033 | -0.229 | 0.801 | 0.014  | 0.161  | -0.056 | 0.057  | 0.104  | 0.149  | 0.105  | 0.065  | 0.034  | -0.172 | -0.143 | -0.075 | 0.015  | 0.102  | -0.011 | 0.086  |  |  |
| JW2428 | b2435    | amiA      | 3  | -0.036 | 0.081  | 0.219  | -0.015 | -0.308 | 0.916 | -0.092 | -0.061 | -0.280 | 0.093  | 0.093  | 0.119  | 0.001  | -0.064 | -0.078 | -0.211 | -0.125 | -0.222 | 0.103  | 0.141  | -0.088 | -0.004 |  |  |
| JW2429 | b2436    | hemF      | 2  | -0.102 | -0.164 | -0.047 | 0.005  | -0.127 | 1.067 | -0.256 | 0.124  | -0.163 | 0.033  | 0.076  | 0.082  | -0.074 | -0.100 | -0.152 | -0.247 | -0.136 | -0.268 | -0.192 | -0.279 | -0.354 | -0.221 |  |  |
| JW2430 | b2437    | yfeG      | 15 | 0.121  | -0.090 | 0.077  | 0.042  | -0.137 | 1.073 | -0.185 | 0.169  | -0.250 | 0.011  | 0.046  | 0.001  | -0.031 | -0.100 | -0.159 | -0.300 | -0.137 | -0.355 | -0.001 | -0.222 | -0.293 | -0.355 |  |  |
| JW2431 | b2438    | (cchA)    | 15 | 0.205  | 0.113  | 0.304  | 0.310  | 0.266  | 0.998 | 0.006  | 0.476  | 0.082  | 0.000  | 0.011  | -0.068 | 0.090  | 0.101  | 0.028  | 0.143  | 0.188  | 0.159  | 0.177  | 0.105  | 0.085  | -0.003 |  |  |
| JW2432 | b2439    | 421#4     | 15 | -0.094 | -0.379 | -0.123 | -0.049 | -0.121 | 0.766 | -0.207 | -0.139 | -0.075 | 0.077  | 0.024  | -0.527 | -0.163 | -0.321 | -0.292 | -0.241 | -0.210 | -0.310 | -0.168 | -0.399 | -0.581 | -0.355 |  |  |
| JW2433 | b2440    | eutC      | 7  | -0.108 | -0.173 | -0.022 | -0.028 | -0.226 | 1.014 | -0.169 | 0.284  | -0.200 | 0.000  | -0.002 | -0.434 | -0.185 | -0.286 | -0.266 | -0.015 | -0.020 | -0.093 | -0.127 | -3.573 | -0.351 | -0.244 |  |  |
| JW2434 | b2441    | eutB      | 7  | -0.276 | -0.191 | 0.071  | -0.141 | -0.231 | 0.866 | -0.154 | 0.078  | -0.119 | 0.031  | -0.029 | -0.105 | -0.119 | -0.360 | -0.112 | -0.326 | -0.100 | -0.119 | -0.140 | -6.866 | -0.203 | -0.079 |  |  |
| JW2435 | b2451    | 421#7     | 15 | -0.046 | -0.121 | -0.043 | -0.026 | -0.020 | 1.023 | -0.287 | 0.200  | -0.022 | -0.024 | -0.047 | -0.335 | -0.156 | -0.241 | -0.221 | -0.183 | -0.059 | -0.122 | -0.074 | -0.465 | -0.222 | -0.115 |  |  |
| JW2436 | b2452    | eutH      | 6  | 0.170  | -0.063 | -0.028 | 0.000  | -0.110 | 0.963 | -0.088 | 0.103  | -0.142 | 0.031  | -0.051 | 0.011  | 0.006  | -0.128 | -0.078 | -0.283 | -0.176 | -0.207 | 0.028  | -6.366 | -0.103 | -0.079 |  |  |
| JW2437 | b2453    | eutG      | 6  | 0.079  | -0.197 | -0.047 | -0.169 | -0.215 | 1.013 | -0.176 | -0.104 | -0.207 | 0.023  | -0.066 | -0.183 | -0.086 | -0.144 | -0.210 | -0.293 | -0.440 | -0.444 | -0.068 | -6.547 | -0.861 | -0.097 |  |  |
| JW2438 | b2454    | eutJ      | 15 | 0.184  | -0.064 | 0.094  | 0.015  | -0.206 | 0.974 | -0.148 | 0.156  | -0.249 | -0.037 | -0.036 | -0.153 | -0.028 | -0.083 | -0.142 | -0.171 | -0.082 | -0.155 | -0.017 | -2.843 | -0.191 | -0.171 |  |  |
| JW2439 | b2455    | eutE      | 6  | 0.127  | -0.042 | 0.226  | -0.047 | -0.110 | 0.983 | -0.    |        |        |        |        |        |        |        |        |        |        |        |        |        |        |        |  |  |

|        |       |             |    |        |        |        |        |        |        |        |        |        |        |        |        |        |        |        |        |        |        |        |        |        |        |   |
|--------|-------|-------------|----|--------|--------|--------|--------|--------|--------|--------|--------|--------|--------|--------|--------|--------|--------|--------|--------|--------|--------|--------|--------|--------|--------|---|
| JW2482 | b2497 | uraA        | 11 | 0.032  | 0.130  | 0.160  | -0.069 | -0.116 | -0.116 | 0.049  | -0.020 | 0.014  | -0.080 | -0.050 | -0.191 | 0.056  | 0.095  | 0.029  | 0.133  | -0.045 | 0.182  | -0.013 | 0.066  | 0.075  | 0.059  |   |
| JW2483 | b2498 | upp         | 8  | 0.067  | -0.001 | 0.288  | 0.079  | 0.280  | -0.135 | 0.060  | 0.200  | 0.271  | -0.083 | -0.057 | 0.173  | 0.047  | 0.032  | 0.072  | 0.157  | 0.233  | 0.264  | -0.287 | 0.036  | 0.042  | -0.008 | 1 |
| JW2484 | b2499 | purM        | 8  | 0.020  | 0.017  | -0.022 | -0.025 | -0.086 | -0.019 | -0.053 | 0.018  | -0.032 | -0.041 | -0.121 | 0.085  | -0.001 | 0.043  | -0.008 | -0.075 | 0.032  | 0.101  | -0.008 | 0.051  | -0.014 | 0.007  | 1 |
| JW2485 | b2500 | purN        | 8  | 0.029  | -0.044 | -0.073 | -0.109 | 0.016  | -0.144 | -0.125 | -0.121 | -0.089 | -0.307 | -0.188 | -0.151 | -0.188 | -0.127 | -0.203 | -0.138 | -0.111 | -0.054 | -0.008 | -0.147 | -0.105 | -0.129 | 1 |
| JW2486 | b2501 | ppk         | 5  | -0.056 | 0.026  | 0.262  | 0.139  | 0.125  | -0.133 | 0.042  | -0.017 | 0.160  | -0.143 | -0.148 | 0.036  | -0.035 | -0.023 | 0.000  | -0.004 | 0.176  | 0.234  | 0.156  | 0.103  | 0.080  | 0.076  | 1 |
| JW2487 | b2502 | ppx         | 5  | 0.071  | 0.036  | 0.181  | 0.140  | -0.022 | 0.008  | 0.086  | -0.009 | -0.053 | -0.014 | 0.005  | 0.041  | 0.112  | 0.103  | 0.070  | -0.011 | 0.050  | 0.118  | 0.069  | 0.124  | 0.083  | -0.016 | 1 |
| JW2488 | b2503 | 427#1       | 15 | -0.101 | 0.121  | 0.120  | -0.178 | -0.093 | -0.104 | 0.133  | -0.280 | -0.061 | 0.094  | 0.080  | 0.102  | 0.180  | 0.197  | 0.134  | -0.080 | -0.068 | -0.069 | 0.083  | 0.138  | 0.111  | 0.188  | 1 |
| JW2489 | b2505 | 427#2       | 15 | 0.001  | 0.009  | -0.069 | -0.081 | 0.121  | -0.026 | -0.033 | -0.046 | 0.046  | -0.048 | -0.364 | -0.070 | -0.131 | -0.138 | -0.218 | -0.002 | 0.096  | 0.133  | -0.069 | -0.138 | -0.132 | -0.087 | 1 |
| JW2490 | b2506 | 427#3       | 15 | 0.072  | 0.121  | 0.078  | -0.036 | 0.162  | -0.065 | 0.050  | 0.058  | 0.172  | 0.034  | -0.060 | -0.018 | 0.071  | 0.036  | -0.071 | 0.185  | 0.200  | 0.101  | 0.087  | 0.079  | 0.104  | 0.136  | 1 |
| JW2491 | b2507 | guaA        | 8  | -0.163 | -0.032 | 0.116  | -0.067 | -0.366 | -0.084 | -0.047 | -0.192 | -0.253 | 0.080  | -0.018 | -0.017 | 0.027  | 0.090  | 0.038  | -0.220 | -0.100 | -0.033 | -0.013 | -0.096 | -0.055 | -0.060 | 1 |
| JW2492 | b2508 | guaB        | 8  | -0.063 | -0.071 | 0.098  | -0.116 | -0.396 | -0.078 | -0.047 | -0.433 | -0.389 | 0.041  | -0.034 | -0.084 | 0.029  | -0.052 | -0.068 | -0.521 | -0.370 | -0.281 | -0.021 | -0.031 | -0.189 | -0.054 | 1 |
| JW2493 | b2509 | xseA        | 8  | 0.095  | -0.043 | 0.105  | -0.779 | -2.093 | 0.051  | -0.009 | -0.924 | -1.916 | 0.006  | -0.006 | -0.174 | 0.020  | 0.041  | -0.018 | -0.913 | -0.828 | -1.416 | -0.022 | -0.221 | -0.180 | -0.077 | 1 |
| JW2494 | b2510 | yfgJ        | 15 | -0.285 | -0.140 | -0.008 | -0.975 | -3.071 | 0.005  | 0.013  | -2.578 | -3.023 | -0.086 | 0.034  | -0.146 | -0.095 | -0.041 | -0.179 | -3.038 | -2.582 | -2.975 | -0.153 | 0.040  | -0.046 | -0.099 | 1 |
| JW2495 | b2511 | yfgK        | 15 | 0.067  | 0.101  | 0.232  | 0.064  | -0.030 | -0.027 | 0.148  | -0.030 | 0.009  | 0.036  | 0.015  | -0.127 | 0.086  | 0.079  | 0.031  | 0.020  | -0.008 | -0.092 | 0.106  | 0.116  | 0.080  | 0.007  | 1 |
| JW2496 | b2512 | yfgL        | 15 | 0.108  | 0.062  | 0.202  | 0.032  | -0.012 | -0.062 | 0.060  | -0.040 | 0.009  | -0.017 | 0.056  | -0.225 | 0.096  | 0.094  | 0.039  | 0.064  | 0.047  | 0.017  | 0.031  | 0.107  | 0.016  | 0.043  | 1 |
| JW2497 | b2513 | yfgM        | 15 | -0.020 | 0.151  | 0.361  | 0.284  | 0.178  | -0.069 | 0.013  | 0.053  | 0.158  | -0.079 | 0.077  | 0.140  | 0.139  | 0.124  | 0.051  | 0.102  | 0.150  | 0.155  | 0.177  | 0.165  | 0.127  | 0.102  | 1 |
| JW2498 | b2514 | hisS        | 12 | 0.034  | 0.178  | 0.187  | 0.211  | 0.019  | -0.017 | -0.053 | 0.003  | -0.047 | 0.083  | 0.078  | 0.077  | 0.152  | 0.085  | 0.031  | 0.027  | 0.048  | 0.017  | 0.065  | 0.089  | 0.029  | -0.112 | 1 |
| JW2499 | b2515 | gcpE        | 15 | 0.072  | -0.022 | 0.184  | 0.099  | -0.009 | 0.062  | -0.079 | -0.001 | -0.064 | 0.007  | 0.057  | -0.075 | 0.116  | 0.112  | 0.005  | 0.070  | 0.052  | -0.003 | 0.004  | 0.006  | -0.089 | -0.130 | 1 |
| JW2500 | b2516 | yfgA        | 15 | -0.058 | -0.032 | -0.056 | -0.162 | -0.280 | -0.090 | -0.227 | -0.371 | -0.435 | 0.014  | -0.149 | -0.250 | -0.217 | -0.148 | -0.180 | -0.324 | -0.399 | -0.420 | -0.114 | -0.157 | -0.305 | -0.304 | 1 |
| JW2501 | b2517 | yfgB        | 15 | -0.025 | 0.112  | 0.270  | 0.130  | -0.021 | -0.100 | 0.078  | -0.063 | 0.021  | 0.062  | -0.001 | -0.133 | 0.049  | 0.094  | 0.002  | 0.096  | 0.154  | 0.029  | 0.109  | 0.000  | -0.132 | -0.019 | 1 |
| JW2502 | b2518 | ndk         | 8  | 0.329  | 0.175  | 0.252  | -0.002 | -0.283 | -0.216 | 0.083  | -0.160 | -0.029 | 0.106  | 0.110  | -0.085 | 0.103  | 0.118  | 0.113  | 0.055  | 0.103  | 0.044  | 0.071  | 0.204  | 0.087  | -0.075 | 1 |
| JW2503 | b2519 | pbpC        | 3  | 0.065  | -0.065 | 0.182  | -0.066 | -0.247 | -0.012 | -0.013 | -0.243 | -0.316 | -0.061 | -0.010 | 0.052  | -0.043 | -0.083 | -0.093 | -0.343 | -0.349 | -0.217 | 0.103  | -0.181 | -0.068 | -0.061 | 1 |
| JW2504 | b2520 | 429#5       | 15 | 0.128  | 0.117  | 0.210  | 0.078  | -0.118 | 0.001  | 0.102  | -0.202 | -0.135 | 0.019  | -0.007 | 0.069  | 0.119  | 0.110  | 0.081  | -0.203 | -0.189 | -0.152 | 0.136  | -6.976 | -0.060 | -0.136 | 1 |
| JW2505 | b2521 | sseA        | 5  | 0.027  | 0.064  | 0.002  | -0.047 | -0.008 | -0.069 | -0.031 | -0.178 | -0.125 | -0.008 | -0.176 | -0.195 | -0.180 | -0.139 | -0.179 | -0.077 | -0.114 | -0.151 | -0.008 | -0.812 | -0.044 | -0.157 | 1 |
| JW2506 | b2522 | sseB        | 15 | 0.126  | -0.043 | -0.002 | -0.061 | -0.033 | -0.048 | 0.016  | 0.060  | -0.035 | -0.026 | -0.117 | -0.117 | -0.027 | -0.002 | -0.054 | -0.013 | -0.055 | -0.171 | -0.054 | 0.063  | 0.081  | -0.042 | 1 |
| JW2507 | b2523 | pepB        | 14 | 0.081  | 0.129  | 0.246  | 0.004  | -0.126 | -0.069 | 0.103  | -0.143 | -0.073 | 0.026  | 0.051  | -0.148 | 0.137  | 0.064  | 0.014  | -0.048 | 0.007  | -0.084 | 0.101  | 0.123  | -0.096 | 0.099  | 1 |
| JW2508 | b2524 | yfhJ        | 15 | -0.079 | 0.105  | 0.298  | -0.062 | -0.489 | -0.236 | 0.084  | -0.284 | -0.211 | 0.084  | 0.076  | 0.193  | 0.157  | 0.164  | 0.164  | -0.234 | -0.203 | -0.219 | 0.082  | 0.237  | -0.012 | -0.009 | 1 |
| JW2509 | b2525 | fdx         | 6  | -0.179 | 0.069  | 0.130  | -0.051 | -0.183 | -0.079 | -0.132 | -0.237 | -0.074 | -0.068 | -0.045 | 0.052  | 0.097  | 0.011  | -0.054 | -0.124 | -0.072 | -0.243 | -0.023 | -0.095 | -0.069 | -0.169 | 1 |
| JW2510 | b2526 | hscA        | 4  | 0.247  | -0.019 | 0.278  | 0.166  | 0.011  | 0.032  | -0.056 | -0.073 | -0.056 | 0.052  | 0.019  | -0.053 | 0.070  | 0.045  | -0.083 | -0.003 | 0.052  | 0.004  | 0.114  | 0.029  | -0.085 | -0.137 | 1 |
| JW2511 | b2527 | hscB        | 14 | 0.447  | 0.044  | 0.251  | 0.112  | 0.127  | 0.060  | -0.009 | 0.038  | 0.057  | -0.089 | 0.011  | -0.092 | 0.055  | 0.016  | -0.089 | 0.028  | 0.056  | 0.049  | 0.105  | -0.131 | -0.091 | -0.223 | 1 |
| JW2512 | b2528 | yfhF        | 15 | -0.108 | -0.049 | 0.017  | 0.055  | 0.052  | -0.101 | 0.019  | 0.072  | 0.134  | 0.088  | -0.002 | -0.188 | -0.041 | -0.018 | -0.164 | 0.240  | 0.066  | 0.045  | -0.115 | -0.052 | -0.087 | -0.134 | 1 |
| JW2513 | b2529 | iscS / yfhN | 14 | 0.087  | -0.016 | 0.270  | 0.109  | 0.154  | -0.074 | 0.087  | 0.151  | 0.243  | -0.099 | -0.031 | -0.188 | 0.040  | 0.066  | 0.078  | 0.237  | 0.230  | 0.153  | 0.095  | 0.030  | 0.150  | -0.073 | 1 |
| JW2514 | b2530 | iscS / yfhO | 1  | -0.208 | 0.050  | 0.257  | 0.094  | 0.026  | -0.108 | 0.021  | 0.023  | 0.129  | 0.022  | -0.053 | 0.089  | -0.014 | 0.032  | 0.013  | 0.032  | 0.185  | 0.056  | 0.144  | -0.001 | -0.058 | 0.030  | 1 |
| JW2515 | b2531 | iscR / yfhP | 15 | 0.068  | 0.040  | 0.087  | -0.112 | 0.233  | -0.055 | 0.025  | 0.122  | 0.130  | -0.049 | -0.041 | 0.067  | -0.030 | 0.013  | -0.041 | 0.051  | 0.151  | 0.091  | 0.146  | 0.031  | 0.024  | -0.015 | 1 |
| JW2516 | b2532 | yfhQ        | 15 | 0.080  | -0.007 | -0.025 | -0.048 | -0.010 | -0.057 | -0.062 | -0.091 | -0.094 | -0.069 | -0.182 | -0.122 | -0.190 | -0.115 | -0.127 | -0.063 | -0.067 | -0.113 | 0.036  | -0.148 | -0.027 | -0.082 | 1 |
| JW2517 | b2533 | subB        | 12 | -0.030 | -0.049 | 0.026  | -0.061 | 0.010  | -0.002 | -0.061 | -0.113 | -0.058 | -0.125 | -0.217 | -0.228 | -0.188 | -0.082 | -0.195 | 0.026  | -0.021 | -0.020 | -0.054 | -0.164 | -0.122 | -0.096 | 1 |
| JW2518 | b2534 | 431#2       | 15 | -0.194 | -0.002 | -0.042 | -0.172 | -0.224 | -0.120 | -0.033 | -0.237 | -0.182 | 0.034  | -0.153 | -0.181 | -0.166 | -0.122 | -0.157 | -0.184 | -0.181 | -0.136 | -0.107 | -0.161 | -0.156 | -0.088 | 1 |
| JW2519 | b2535 | csiE        | 14 | 0.121  | 0.060  | 0.182  | -0.053 | -0.128 | -0.057 | 0.033  | -0.104 | -0.026 | -0.078 | -0.061 | 0.262  | 0.014  | 0.035  | -0.036 | -0.051 | 0.015  | -0.137 | 0.004  | 0.056  | 0.061  | -0.028 | 1 |
| JW2520 | b2536 | yfhS        | 15 | -0.191 | 0.001  | 0.191  | -0.062 | -0.510 | -0.133 | -0.082 | -0.426 | -0.399 | -0.050 | -0.040 | 0.567  | 0.027  | 0.048  | 0.017  | -0.433 | -0.364 | -0.376 | 0.060  | 0.137  | 0.063  | 0.004  | 1 |
| JW2521 | b2537 | yfhT        | 15 | 0.088  | 0.152  | 0.245  | -0.923 | -4.007 | -0.085 | -0.001 | -3.819 | -3.851 | -0.009 | -0.006 | 0.049  | 0.155  | 0.085  | 0.071  | -3.932 | -3.721 | -3.966 | 0.074  | 0.073  | 0.007  | 0.007  | 1 |
| JW2522 | b2538 | dgxA        | 15 | 0.070  | -0.014 | 0.186  | -0.920 | -3.930 | -0.011 | -0.013 | -3.645 | -3.825 | -0.077 | -0.042 | -0.043 | 0.088  | 0.091  | 0.048  | -4.027 | -3.500 | -3.599 | 0.036  | 0.046  | -0.064 | -0.072 | 1 |
| JW2523 | b2539 | dgxB        | 6  | -0.118 | 0.144  | 0.305  | -0.895 | -4.119 | -0.043 | 0.116  | -3.643 | -3.944 | -0.264 | -0.217 | -0.261 | 0.163  | 0.177  | 0.108  | -4.114 | -3.890 | -4.061 | 0.147  | -0.244 | -0.399 | 0.051  | 1 |
| JW2524 | b2540 | hcaC        | 15 | 0.128  | 0.129  | 0.282  | -0.736 | -3.014 | -0.035 | 0.128  | -2.609 | -2.854 | -0.020 | -0.038 | -0.123 | 0.063  | 0.065  | 0.042  | -3.045 | -2.738 | -2.832 | 0.089  | -0.001 | -0.047 | -0.062 | 1 |
| JW2525 | b2541 | hcaB        | 5  | -0.091 | 0.157  | 0.197  | -0.658 | -2.003 | -0.148 | 0.037  | -1.791 | -1.706 | -0.053 | 0.007  | -0.138 | 0.049  | 0.024  | -0.023 | -1.702 | -1.505 | -1.497 | 0.091  | 0.134  | 0.044  | -0.030 | 1 |
| JW2526 | b2542 | hcaD        | 6  | -0.378 | 0.030  | 0.152  | -0.981 | -4.349 | -0.089 | -0.032 | -4.502 | -4.825 | -0.026 | -0.064 | -0.174 | -0.238 | -0.159 | -0.144 | -4.562 | -4.025 | -4.254 | 0.076  | 0.041  | -0.222 | 0.040  | 1 |
| JW2527 | b2543 | yphA        | 15 | -0.085 | 0.026  | 0.075  | -0.190 | -0.433 | -0.051 | -0.041 | -0.427 | -0.365 | -0.056 | -0.051 | 0.095  | -0.001 | 0.010  | -0.021 | -0.447 | -0.345 | -0.405 | 0.038  | 0.056  | -0.071 | 0.009  | 1 |
| JW2528 | b2544 | yphB        | 15 | -0.009 | 0.046  | 0.103  | -0.072 | -0.281 | 0.035  | -0.017 | -0.275 | -0.332 | -0.103 | -0.142 | -0.003 | 0.027  | -0.004 | -0.065 | -0     |        |        |        |        |        |        |   |







|        |       |        |    |        |        |        |        |        |        |        |        |        |        |        |        |        |        |        |        |        |        |        |        |        |        |   |   |
|--------|-------|--------|----|--------|--------|--------|--------|--------|--------|--------|--------|--------|--------|--------|--------|--------|--------|--------|--------|--------|--------|--------|--------|--------|--------|---|---|
| JW2752 | b2781 | mazG   | 15 | -0.070 | 0.001  | 0.085  | 0.041  | 0.160  | -0.043 | -0.018 | 0.136  | 0.100  | -0.085 | -0.054 | 0.202  | -0.047 | 0.032  | 0.038  | -0.004 | 0.061  | 0.162  | 0.085  | 0.042  | -0.140 | 0.022  |   |   |
| JW2753 | b2782 | chpA   | 14 | -0.068 | 0.161  | 0.031  | -0.048 | -0.069 | 0.015  | 0.143  | 0.040  | -0.056 | -0.066 | -0.044 | 0.217  | -0.033 | 0.155  | 0.056  | -0.008 | 0.055  | -3.930 | 0.061  | -3.972 | 0.178  | 0.138  | 1 | 1 |
| JW2754 | b2783 | chpR   | 14 | 0.213  | 0.043  | 0.031  | 0.023  | 0.188  | 0.036  | 0.067  | 0.136  | 0.054  | -0.245 | -0.061 | 0.063  | -0.022 | 0.092  | -0.012 | 0.089  | 0.055  | -3.815 | -0.013 | -4.029 | 0.051  | 0.056  | 1 | 1 |
| JW2755 | b2784 | relA   | 9  | -0.029 | -0.129 | -0.131 | -0.053 | 0.109  | 0.147  | -0.044 | -0.014 | -0.029 | -0.046 | 0.007  | 0.074  | -0.211 | -0.260 | -0.347 | -0.063 | -0.107 | -0.038 | -0.041 | -0.159 | -0.118 | 0.167  | 1 | 1 |
| JW2756 | b2785 | ycgA   | 12 | -0.008 | 0.078  | 0.108  | 0.207  | 0.157  | 0.052  | 0.069  | 0.202  | 0.040  | -0.006 | 0.007  | 0.212  | -0.008 | -0.071 | -0.080 | 0.215  | 0.166  | 0.333  | 0.077  | 0.104  | 0.036  | -0.015 | 1 | 1 |
| JW2757 | b2786 | barA   | 9  | 0.223  | 0.117  | 0.215  | 0.232  | 0.208  | 0.060  | 0.118  | 0.199  | 0.102  | -0.060 | 0.035  | 0.098  | 0.121  | 0.116  | 0.075  | 0.179  | 0.166  | 0.155  | 0.178  | 0.101  | 0.139  | 0.071  | 1 | 1 |
| JW2758 | b2787 | ycgX   | 5  | -0.148 | -0.136 | -0.168 | -0.145 | -0.050 | 0.043  | 0.005  | -0.187 | -0.131 | -0.112 | -0.065 | -0.290 | -0.133 | -0.110 | -0.199 | -0.236 | -0.186 | -0.216 | -0.149 | -0.116 | -0.214 | -0.057 | 1 | 1 |
| JW2759 | b2788 | gud2   | 5  | -0.200 | -0.043 | -0.181 | -0.266 | -0.278 | 0.000  | -0.140 | -0.101 | -0.248 | -0.020 | -0.031 | -0.246 | -0.113 | -0.038 | -0.231 | -0.154 | -0.176 | -0.181 | -0.132 | -0.244 | -0.226 | -0.070 | 1 | 1 |
| JW2760 | b2789 | gudT   | 11 | -0.144 | -0.063 | -0.096 | 0.040  | -0.043 | -0.024 | -0.093 | -0.044 | -0.022 | -0.028 | 0.030  | 0.076  | -0.071 | -0.060 | 0.000  | -0.091 | -0.092 | -0.037 | -0.061 | -0.033 | 0.020  | 0.008  | 1 | 1 |
| JW2761 | b2790 | (mioC) | 15 | -0.054 | -0.074 | 0.004  | 0.169  | 0.193  | -0.053 | -0.042 | 0.173  | 0.260  | 0.048  | 0.024  | 0.197  | -0.059 | -0.033 | -0.066 | 0.247  | 0.236  | 0.353  | -0.049 | 0.010  | 0.003  | -0.075 | 1 | 1 |
| JW2762 | b2791 | ycgC   | 15 | 0.016  | -0.081 | -0.223 | -0.124 | -0.093 | -0.007 | -0.212 | -0.145 | -0.222 | -0.058 | -0.179 | -0.072 | -0.145 | -0.131 | -0.113 | -0.127 | -0.230 | -0.184 | -0.152 | -0.064 | -0.139 | -0.138 | 1 | 1 |
| JW2763 | b2792 | ycgB   | 15 | 0.179  | 0.080  | 0.177  | 0.166  | 0.120  | 0.074  | 0.152  | 0.117  | 0.061  | -0.021 | 0.026  | 0.073  | 0.069  | 0.138  | 0.075  | 0.130  | 0.138  | 0.276  | 0.119  | 0.167  | 0.143  | 0.083  | 1 | 1 |
| JW2764 | b2793 | syd    | 4  | -0.114 | 0.063  | 0.107  | 0.250  | 0.363  | 0.066  | 0.092  | 0.262  | 0.332  | -0.056 | 0.016  | -0.090 | -0.062 | 0.013  | -0.040 | 0.325  | 0.205  | 0.343  | 0.018  | 0.038  | 0.014  | 0.035  | 1 | 1 |
| JW2765 | b2794 | ycgD   | 15 | -0.051 | 0.034  | 0.066  | 0.003  | -0.039 | -0.078 | 0.011  | 0.008  | 0.086  | 0.041  | 0.106  | -0.007 | 0.106  | 0.134  | 0.111  | 0.228  | 0.052  | 0.168  | -0.056 | 0.031  | 0.065  | 0.210  | 1 | 1 |
| JW2766 | b2795 | ycgH   | 15 | -0.273 | -0.092 | 0.071  | 0.120  | 0.101  | -0.056 | -0.057 | 0.208  | 0.247  | 0.054  | 0.086  | 0.161  | 0.016  | 0.061  | 0.202  | 0.169  | 0.190  | 0.286  | 0.033  | 0.141  | 0.072  | 0.125  | 1 | 1 |
| JW2767 | b2796 | sdaC   | 11 | -0.066 | 0.022  | 0.125  | 0.248  | 0.161  | -0.021 | -0.002 | 0.177  | 0.173  | 0.076  | 0.061  | 0.067  | -0.009 | -0.035 | 0.019  | 0.176  | 0.178  | 0.330  | 0.098  | 0.127  | 0.067  | 0.073  | 1 | 1 |
| JW2768 | b2797 | sdaB   | 5  | 0.175  | -0.015 | 0.098  | 0.338  | 0.281  | 0.083  | -0.061 | 0.093  | 0.201  | 0.053  | 0.051  | 0.012  | 0.064  | -0.065 | -0.039 | 0.136  | 0.137  | 0.189  | 0.061  | 0.004  | -0.025 | -0.026 | 1 | 1 |
| JW2769 | b2798 | exo    | 14 | 0.065  | 0.067  | 0.002  | 0.005  | 0.031  | -0.010 | -0.068 | -0.061 | -0.096 | -0.008 | -0.160 | -0.156 | -0.153 | -0.118 | -0.104 | -0.014 | -0.043 | -0.009 | -0.032 | -0.053 | -0.038 | -0.091 | 1 | 1 |
| JW2770 | b2799 | fucO   | 6  | 0.143  | 0.044  | 0.098  | 0.209  | 0.174  | 0.025  | 0.140  | 0.171  | 0.139  | 0.045  | 0.062  | -0.018 | -0.046 | -0.142 | -0.069 | 0.229  | 0.165  | 0.168  | 0.101  | 0.164  | 0.067  | 0.097  | 1 | 1 |
| JW2771 | b2800 | fucA   | 6  | 0.123  | 0.088  | 0.110  | 0.157  | 0.157  | -0.007 | 0.097  | 0.076  | 0.199  | -0.027 | 0.043  | -0.034 | -0.222 | -0.316 | -0.314 | 0.174  | 0.051  | 0.072  | 0.108  | 0.143  | 0.073  | -0.038 | 1 | 1 |
| JW2772 | b2801 | fucP   | 11 | -0.403 | -0.108 | -0.014 | 0.132  | 0.027  | -0.172 | -0.037 | 0.199  | 0.274  | 0.122  | 0.237  | 0.227  | -5.691 | -5.711 | -5.462 | 0.237  | 0.067  | 0.137  | -0.018 | 0.245  | 0.138  | -0.024 | 1 | 1 |
| JW2773 | b2802 | fucI   | 6  | -0.051 | 0.106  | 0.170  | 0.249  | 0.109  | -0.001 | -0.046 | 0.061  | 0.083  | 0.136  | 0.121  | 0.247  | 0.088  | 0.070  | 0.057  | 0.110  | 0.129  | 0.130  | 0.099  | 0.091  | 0.006  | 0.069  | 1 | 1 |
| JW2774 | b2803 | fucK   | 6  | 0.155  | 0.050  | 0.126  | 0.369  | 0.223  | 0.084  | -0.007 | 0.171  | 0.059  | 0.022  | 0.082  | 0.128  | 0.164  | 0.119  | 0.130  | 0.110  | 0.189  | 0.061  | 0.086  | 0.046  | 0.029  | 0.029  | 1 | 1 |
| JW2775 | b2804 | fucU   | 6  | 0.091  | 0.029  | 0.065  | 0.249  | 0.040  | 0.123  | 0.027  | 0.165  | 0.008  | 0.070  | 0.075  | 0.078  | 0.165  | 0.309  | 0.218  | 0.144  | 0.086  | 0.185  | 0.129  | -0.001 | -0.028 | -0.061 | 1 | 1 |
| JW2776 | b2805 | fucR   | 6  | 0.218  | 0.164  | 0.222  | 0.321  | 0.284  | 0.103  | 0.163  | 0.297  | 0.231  | 0.009  | 0.096  | 0.013  | 0.155  | 0.131  | 0.149  | 0.356  | 0.261  | 0.269  | 0.118  | 0.043  | -0.052 | 0.032  | 1 | 1 |
| JW2777 | b2806 | ycgE   | 15 | 0.077  | 0.026  | 0.039  | 0.195  | 0.133  | 0.022  | -0.043 | 0.216  | 0.157  | -0.024 | 0.037  | -0.193 | -0.036 | 0.016  | -0.005 | 0.257  | 0.037  | 0.116  | -0.054 | 0.064  | -0.016 | -0.088 | 1 | 1 |
| JW2778 | b2807 | ycgD   | 15 | -0.241 | -0.080 | 0.015  | 0.067  | 0.063  | -0.116 | -0.054 | 0.100  | 0.136  | -0.051 | 0.056  | 0.160  | -0.120 | -0.212 | -0.042 | 0.111  | 0.197  | 0.277  | 0.015  | 0.042  | -0.026 | 0.013  | 1 | 1 |
| JW2779 | b2808 | gcvA   | 5  | -0.164 | -0.080 | -0.086 | 0.066  | 0.044  | -0.011 | -0.091 | 0.094  | 0.168  | 0.045  | 0.044  | 0.219  | 0.026  | 0.101  | 0.077  | 0.093  | 0.099  | 0.190  | -0.134 | 0.093  | 0.084  | -0.020 | 1 | 1 |
| JW2780 | b2809 | ycgI   | 15 | -0.173 | 0.110  | 0.041  | 0.028  | -0.009 | -0.201 | 0.152  | 0.013  | 0.140  | 0.267  | -0.076 | 0.238  | 0.154  | 0.130  | 0.156  | 0.372  | 0.233  | 0.472  | -0.024 | 0.115  | 0.277  | 0.283  | 1 | 1 |
| JW2781 | b2810 | (nifs) | 15 | 0.022  | -0.057 | -0.001 | 0.018  | -0.088 | 0.103  | -0.040 | -0.046 | -0.181 | -0.006 | -0.014 | 0.070  | 0.111  | 0.037  | 0.024  | -0.118 | -0.092 | -0.103 | -0.003 | -0.127 | -0.124 | -0.125 | 1 | 1 |
| JW2782 | b2811 | ycgK   | 15 | 0.017  | -0.207 | -0.268 | -0.032 | 0.126  | -0.047 | -0.215 | 0.135  | 0.113  | -0.111 | -0.032 | -0.038 | -0.293 | -0.357 | -0.352 | 0.264  | 0.218  | 0.310  | -0.205 | -0.208 | -0.292 | -0.271 | 1 | 1 |
| JW2783 | b2812 | ycgL   | 2  | -0.120 | -0.305 | -0.145 | -0.128 | -0.100 | 0.089  | -0.057 | -0.202 | -0.196 | -0.035 | -0.010 | -0.053 | -0.112 | -0.114 | -0.124 | -0.199 | -0.168 | -0.192 | -0.252 | -0.067 | -0.200 | -0.107 | 1 | 1 |
| JW2784 | b2813 | mitA   | 3  | -0.330 | -0.151 | -0.019 | 0.175  | 0.134  | -0.034 | -0.180 | 0.183  | 0.137  | 0.005  | 0.218  | 0.188  | -0.037 | -0.143 | -0.048 | 0.077  | -0.006 | 0.106  | -0.059 | 0.032  | -0.091 | 0.080  | 1 | 1 |
| JW2785 |       | amiC   | 3  | -0.052 | 0.194  | 0.194  | 0.206  | 0.009  | 0.031  | -0.004 | -0.006 | 0.043  | -0.002 | 0.100  | 0.236  | 0.054  | 0.142  | 0.062  | -0.018 | -0.169 | 0.053  | 0.094  | 0.036  | -0.022 | -0.080 | 1 | 1 |
| JW2786 | b2818 | argA   | 1  | 0.086  | 0.011  | 0.116  | 0.269  | 0.225  | -0.008 | -0.030 | 0.219  | 0.152  | 0.062  | 0.078  | 0.166  | 0.126  | 0.066  | 0.090  | 0.298  | 0.213  | 0.414  | 0.058  | 0.096  | 0.020  | -0.041 | 1 | 1 |
| JW2787 | b2819 | recD   | 8  | 0.055  | -0.032 | 0.137  | 0.207  | 0.165  | 0.093  | -0.018 | 0.207  | 0.115  | 0.020  | 0.066  | 0.102  | 0.114  | 0.189  | 0.046  | 0.199  | 0.179  | 0.259  | 0.039  | 0.119  | 0.048  | -0.041 | 1 | 1 |
| JW2788 | b2820 | recB   | 8  | 0.308  | 0.149  | 0.184  | 0.259  | 0.164  | -0.073 | 0.015  | 0.209  | 0.116  | -0.015 | 0.011  | -0.062 | 0.159  | 0.040  | 0.072  | 0.327  | 0.193  | 0.197  | 0.134  | 0.119  | 0.092  | -0.053 | 1 | 1 |
| JW2789 | b2821 | ptr    | 14 | -0.072 | -0.056 | -0.090 | -0.158 | -0.196 | -0.006 | -0.022 | -0.166 | -0.047 | 0.041  | 0.016  | -0.332 | -0.236 | -0.178 | -0.252 | 0.059  | -0.005 | 0.064  | -0.178 | 0.027  | -0.097 | 0.082  | 1 | 1 |
| JW2790 | b2822 | recC   | 8  | -0.197 | -0.110 | 0.100  | 0.043  | -0.011 | -0.163 | -0.069 | -0.028 | 0.126  | -0.071 | 0.064  | 0.023  | -0.248 | -0.175 | -0.072 | -0.020 | -0.028 | -0.038 | 0.114  | 0.000  | -0.165 | 0.081  | 1 | 1 |
| JW2791 | b2823 | ppdC   | 15 | -0.200 | -0.171 | -0.129 | 0.076  | 0.110  | -0.122 | -0.217 | 0.211  | 0.218  | 0.063  | -0.058 | -0.082 | -0.158 | -0.127 | -0.140 | 0.369  | 0.374  | 0.493  | -0.217 | -0.300 | 0.117  | -0.182 | 1 | 1 |
| JW2792 | b2824 | ycgB   | 15 | -0.220 | -0.152 | -0.108 | -0.126 | -0.227 | -0.082 | -0.080 | -0.414 | -0.207 | -0.092 | -0.082 | -0.215 | -0.246 | -0.235 | -0.285 | -0.322 | -0.335 | -0.274 | -0.102 | -0.251 | -0.087 | -0.111 | 1 | 1 |
| JW2793 | b2825 | ppdB   | 15 | 0.079  | 0.054  | 0.033  | 0.081  | -0.018 | -0.011 | 0.104  | 0.041  | -0.022 | -0.049 | 0.004  | -0.025 | 0.093  | 0.116  | 0.078  | 0.099  | 0.063  | 0.164  | 0.007  | 0.087  | 0.093  | 0.094  | 1 | 1 |
| JW2794 | b2826 | ppdA   | 3  | 0.048  | 0.066  | 0.119  | 0.077  | 0.015  | -0.068 | 0.093  | 0.101  | 0.010  | -0.133 | -0.066 | -0.146 | 0.018  | -0.004 | 0.017  | 0.105  | 0.087  | 0.197  | -0.001 | -0.001 | 0.022  | 0.010  | 1 | 1 |
| JW2795 | b2827 | thyA   | 8  | -0.084 | -0.055 | -0.021 | -0.017 | -0.006 | 0.028  | -0.056 | -0.004 | -0.013 | 0.021  | 0.023  | -0.137 | -0.075 | -0.124 | -0.166 | 0.053  | 0.023  | 0.012  | -0.012 | -0.084 | -0.080 | -0.087 | 1 | 1 |
| JW2796 | b2828 | lgt    | 7  | -0.475 | -0.075 | -0.067 | 0.100  | -0.037 | -0.109 | -0.250 | 0.062  | 0.077  | 0.080  | -0.036 | 0.039  | -0.182 | -0.175 | -0.136 | -0.061 | -0.116 | 0.050  | -0.160 | -0.038 | -0.061 | -0.125 | 1 | 1 |
| JW2797 | b2829 | ptsP   | 11 | 0.030  | 0.165  | 0.216  | 0.231  | 0.137  | -0.003 | -0.010 | 0.027  | 0.046  | 0.025  | 0.096  | 0.223  | 0.110  | 0.110  | 0.121  | 0.075  | 0.063  | 0.099  |        |        |        |        |   |   |

|        |       |            |    |        |        |        |        |        |        |        |        |        |        |        |        |        |        |        |        |        |        |        |        |        |        |   |
|--------|-------|------------|----|--------|--------|--------|--------|--------|--------|--------|--------|--------|--------|--------|--------|--------|--------|--------|--------|--------|--------|--------|--------|--------|--------|---|
| JW2846 | b2878 | (gltD)     | 15 | 0.120  | 0.068  | 0.095  | 0.230  | 0.176  | 0.066  | 0.087  | 0.139  | 0.060  | 0.034  | -0.029 | -0.033 | -9.190 | 0.079  | 0.046  | 0.059  | 0.056  | 0.151  | 0.109  | -9.279 | 0.091  | 0.087  | 1 |
| JW2847 | b2879 | 467#1      | 15 | -0.054 | -0.041 | 0.041  | -0.003 | 0.042  | 0.121  | 0.056  | -0.070 | -0.110 | 0.005  | 0.013  | 0.068  | -6.429 | -0.080 | -0.057 | 0.069  | 0.001  | 0.069  | 0.063  | -7.182 | -0.099 | 0.004  | 1 |
| JW2848 | b2880 | ygfM       | 15 | -0.010 | 0.203  | 0.083  | 0.077  | 0.051  | 0.021  | 0.195  | 0.086  | -0.028 | -0.023 | 0.015  | 0.058  | -4.640 | 0.034  | 0.013  | 0.079  | 0.088  | 0.077  | 0.165  | -5.114 | -0.041 | 0.092  | 1 |
| JW2849 | b2881 | (yagR)     | 15 | -0.237 | -0.025 | 0.073  | 0.232  | 0.191  | -0.048 | -0.062 | 0.207  | 0.222  | -0.004 | 0.085  | 0.216  | -7.729 | -0.108 | 0.021  | 0.086  | 0.156  | 0.154  | 0.075  | -8.842 | 0.006  | -0.028 | 1 |
| JW2850 | b2882 | ygfO       | 11 | -0.089 | 0.045  | 0.012  | 0.212  | 0.114  | 0.067  | 0.010  | 0.200  | 0.082  | 0.026  | 0.054  | 0.159  | 0.027  | 0.121  | 0.182  | 0.056  | 0.068  | 0.081  | 0.014  | -6.863 | 0.108  | -5.834 | 1 |
| JW2851 | b2883 | ygfP       | 15 | 0.093  | 0.070  | 0.126  | 0.342  | 0.279  | 0.092  | 0.071  | 0.299  | 0.197  | 0.004  | 0.047  | 0.137  | 0.069  | 0.080  | 0.115  | 0.253  | 0.163  | 0.370  | 0.096  | -7.261 | 0.040  | -1.961 | 1 |
| JW2852 | b2884 | ygfQ       | 15 | 0.001  | -0.056 | -0.041 | -0.002 | -0.149 | 0.058  | 0.026  | -0.130 | -0.142 | 0.045  | 0.017  | 0.044  | -0.057 | 0.044  | 0.027  | 0.048  | -0.140 | 0.034  | -0.101 | -2.095 | 0.033  | -0.532 | 1 |
| JW2853 | b2885 | ygfR       | 15 | -0.146 | -0.105 | -0.345 | 0.040  | 0.054  | 0.057  | -0.246 | -0.171 | 0.065  | 0.089  | 0.008  | -0.147 | -0.469 | -0.386 | -0.270 | -0.149 | -0.237 | -0.140 | -0.050 | -2.505 | 0.148  | -2.779 | 1 |
| JW2854 | b2886 | ygfS       | 6  | 0.137  | 0.170  | 0.236  | 0.310  | 0.280  | -0.023 | 0.160  | -0.051 | 0.237  | 0.006  | -0.036 | -0.218 | 0.019  | 0.017  | 0.068  | 0.409  | 0.278  | 0.146  | 0.128  | -5.635 | -0.092 | 0.066  | 1 |
| JW2855 | b2887 | ygfT       | 15 | -0.203 | -0.091 | -0.091 | 0.173  | 0.286  | -0.031 | -0.031 | 0.053  | 0.252  | -0.020 | -0.106 | 0.167  | -0.102 | -0.098 | 0.069  | -0.082 | -0.113 | -0.114 | 0.027  | -6.086 | -0.019 | 0.026  | 1 |
| JW2856 | b2888 | pbuX       | 11 | -0.020 | -0.028 | -0.100 | 0.147  | 0.282  | -0.018 | -0.059 | 0.171  | 0.356  | 0.004  | -0.174 | 0.102  | -0.049 | 0.004  | 0.018  | -0.190 | -0.056 | -0.118 | 0.005  | 0.035  | 0.001  | 0.042  | 1 |
| JW2857 | b2889 | idi        | 14 | 0.047  | -0.127 | -0.086 | 0.161  | 0.206  | 0.072  | -0.056 | 0.039  | 0.011  | -0.043 | -0.358 | 0.039  | -0.090 | -0.052 | -0.081 | 0.084  | 0.146  | 0.155  | 0.042  | -0.321 | 0.084  | -0.035 | 1 |
| JW2858 | b2890 | lysS       | 12 | 0.042  | -0.013 | 0.015  | 0.162  | 0.200  | 0.164  | 0.019  | 0.169  | -0.195 | 0.049  | -0.446 | -0.015 | -0.164 | -0.176 | -0.259 | 0.149  | 0.104  | 0.285  | 0.098  | -0.135 | -0.211 | 0.068  | 1 |
| JW2859 | b2891 | prfB       | 12 | 0.139  | 0.034  | 0.035  | 0.015  | 0.252  | 0.027  | 0.065  | 0.200  | 0.094  | -0.122 | -0.383 | -0.053 | -0.034 | -0.121 | -0.072 | 0.174  | 0.182  | 0.271  | 0.115  | 0.089  | -0.033 | 0.086  | 1 |
| JW2860 | b2892 | recJ       | 8  | -0.077 | -0.033 | -0.114 | -0.265 | -0.429 | 0.035  | 0.002  | -0.235 | -0.479 | -0.019 | -0.653 | -0.265 | -0.046 | -0.087 | -0.174 | -0.497 | -0.205 | -0.007 | -0.108 | -0.145 | -0.226 | -0.070 | 1 |
| JW2861 | b2893 | dsbC       | 3  | -0.291 | -0.049 | 0.088  | 0.168  | 0.176  | -0.088 | -0.087 | 0.225  | 0.242  | -0.047 | -0.493 | 0.094  | -0.339 | -0.477 | -0.365 | 0.142  | 0.202  | 0.259  | 0.052  | 0.083  | 0.000  | 0.033  | 1 |
| JW2862 | b2894 | xerD       | 10 | -0.004 | -0.015 | 0.042  | 0.039  | -0.021 | 0.089  | 0.055  | 0.122  | 0.015  | 0.087  | -0.248 | -0.134 | -0.167 | -0.157 | -0.234 | 0.157  | 0.115  | 0.220  | -0.014 | -0.005 | 0.003  | 0.006  | 1 |
| JW2863 | b2895 | fldB       | 2  | 0.021  | 0.110  | 0.148  | 0.201  | 0.237  | -0.029 | 0.196  | 0.283  | 0.225  | 0.073  | -0.013 | 0.008  | 0.111  | 0.073  | 0.105  | 0.464  | 0.254  | 0.331  | 0.109  | 0.193  | -0.133 | 0.137  | 1 |
| JW2864 | b2896 | ygfX       | 15 | -0.018 | 0.104  | 0.099  | 0.041  | -0.005 | -0.076 | 0.060  | -0.174 | 0.041  | -0.092 | -0.439 | -0.022 | 0.079  | 0.038  | 0.073  | -0.029 | 0.028  | -0.102 | 0.038  | 0.070  | -0.188 | 0.070  | 1 |
| JW2865 | b2897 | ygfY       | 15 | -0.066 | 0.008  | 0.027  | 0.020  | 0.087  | -0.071 | -0.059 | 0.103  | 0.164  | -0.054 | -0.235 | 0.052  | -0.057 | -0.054 | -0.009 | 0.193  | 0.230  | 0.184  | -0.005 | -0.025 | -0.047 | -0.013 | 1 |
| JW2866 | b2898 | up14       | 15 | -0.117 | 0.092  | 0.237  | 0.124  | -0.076 | 0.028  | 0.115  | -0.098 | -0.081 | -0.011 | -0.240 | 0.161  | 0.111  | 0.091  | 0.057  | -0.112 | -0.085 | -0.036 | 0.209  | 0.041  | -0.257 | 0.020  | 1 |
| JW2867 | b2899 | yqfA       | 15 | -0.135 | -0.012 | -0.053 | -0.071 | -0.211 | 0.067  | 0.051  | -0.363 | -0.200 | -0.007 | -0.465 | 0.045  | -0.127 | -0.068 | -0.101 | -0.138 | -0.222 | -0.152 | -0.059 | -0.122 | -0.117 | -0.107 | 1 |
| JW2868 | b2900 | yqfB       | 15 | 0.020  | -0.033 | -0.295 | -0.100 | -0.148 | 0.033  | -0.036 | -0.076 | -0.001 | -0.009 | -0.362 | -0.260 | -0.148 | -0.105 | 0.168  | 0.105  | -0.083 | -0.112 | -0.062 | -0.159 | -0.127 | -0.127 | 1 |
| JW2869 | b2901 | bgfA       | 6  | -0.067 | 0.000  | -0.051 | -0.084 | -0.234 | -0.068 | -0.135 | -0.239 | -0.094 | -0.023 | -0.226 | -0.294 | -0.075 | -0.132 | -0.201 | -0.116 | -0.187 | -0.168 | -0.108 | -0.151 | -0.077 | -0.100 | 1 |
| JW2870 | b2902 | ygfF       | 15 | -2.392 | -0.149 | -0.115 | -0.781 | -2.417 | -0.286 | -0.214 | -2.407 | -2.307 | -0.173 | -2.207 | -0.240 | -0.301 | -0.315 | -0.201 | -2.534 | -2.310 | -2.382 | -0.168 | -0.153 | -0.479 | -0.305 | 1 |
| JW2871 | b2903 | gcvP       | 5  | -0.114 | -0.031 | 0.145  | 0.199  | 0.176  | 0.078  | -0.026 | -0.022 | 0.023  | -0.048 | -0.340 | 0.082  | 0.105  | 0.039  | 0.035  | 0.044  | 0.060  | -0.009 | 0.112  | -0.031 | -0.030 | -0.045 | 1 |
| JW2872 | b2904 | gcvH       | 5  | -0.098 | 0.128  | 0.156  | 0.150  | -0.021 | -0.034 | -0.041 | -0.146 | 0.095  | 0.020  | -0.104 | 0.145  | -0.003 | 0.035  | -0.020 | 0.053  | 0.028  | 0.002  | 0.098  | 0.116  | 0.023  | -0.027 | 1 |
| JW2873 | b2905 | gcvT       | 5  | -0.030 | 0.067  | 0.161  | 0.285  | 0.003  | 0.031  | 0.031  | -0.094 | -0.082 | 0.018  | -0.164 | 0.186  | 0.192  | 0.139  | 0.090  | 0.012  | 0.025  | 0.069  | 0.084  | 0.028  | 0.074  | -0.018 | 1 |
| JW2874 | b2906 | visC       | 2  | -0.141 | -0.092 | -0.048 | 0.072  | -0.192 | 0.083  | -0.089 | 0.064  | -0.156 | 0.005  | -0.201 | -0.013 | 0.030  | 0.076  | -0.052 | -0.069 | -0.137 | -0.186 | -0.150 | -0.311 | -0.125 | -0.112 | 1 |
| JW2875 | b2907 | ubfH       | 2  | 0.043  | -0.277 | -0.338 | -0.159 | -0.161 | 0.200  | -0.395 | -0.178 | -0.242 | -0.004 | -0.555 | -0.144 | -0.239 | -0.219 | -0.392 | -0.363 | -0.342 | -0.307 | -0.446 | -0.528 | -0.085 | -0.440 | 1 |
| JW2876 | b2908 | pepP       | 14 | -0.098 | -0.012 | -0.111 | -0.025 | -0.228 | -0.016 | -0.198 | 0.065  | -0.143 | 0.059  | -0.312 | -0.173 | -0.032 | 0.009  | -0.073 | 0.251  | -0.076 | 0.012  | -0.145 | 0.019  | -0.144 | -0.141 | 1 |
| JW2877 | b2909 | ygfB       | 15 | 0.087  | 0.126  | 0.162  | 0.153  | -0.029 | -0.089 | 0.128  | 0.024  | 0.103  | -0.030 | -0.142 | -0.044 | 0.094  | 0.102  | 0.116  | 0.187  | 0.006  | 0.154  | 0.042  | -0.060 | -0.018 | -0.083 | 1 |
| JW2878 | b2910 | ygfE       | 15 | -0.218 | -0.056 | -0.013 | -0.109 | -0.070 | -0.163 | -0.083 | -0.020 | 0.094  | 0.083  | -0.125 | 0.026  | 0.091  | 0.133  | 0.156  | 0.122  | 0.184  | 0.251  | 0.014  | 0.079  | -0.019 | -0.060 | 1 |
| JW2879 | b2912 | ygfA       | 15 | 0.060  | -0.014 | -0.048 | 0.066  | 0.128  | 0.043  | 0.059  | 0.177  | 0.093  | -0.058 | -0.112 | -0.012 | -0.022 | 0.049  | 0.004  | 0.000  | -0.057 | 0.114  | -0.053 | -0.017 | 0.034  | -0.036 | 1 |
| JW2880 | b2913 | serA       | 1  | 0.183  | 0.083  | 0.236  | 0.167  | 0.168  | 0.056  | 0.179  | 0.168  | 0.121  | -0.028 | -0.051 | 0.020  | 0.084  | 0.088  | 0.054  | 0.270  | 0.242  | 0.232  | 0.231  | -0.008 | 0.128  | 0.049  | 1 |
| JW2881 | b2914 | rpiA       | 6  | 0.054  | 0.101  | 0.130  | 0.166  | 0.190  | -0.028 | 0.145  | 0.118  | 0.212  | -0.019 | -0.162 | -0.043 | -0.002 | 0.030  | 0.001  | 0.219  | 0.119  | 0.190  | 0.104  | -0.047 | 0.066  | -0.040 | 1 |
| JW2882 | b2915 | ygfE       | 15 | -0.729 | -0.689 | -0.834 | -0.402 | -0.305 | -0.142 | -0.626 | -0.146 | -0.140 | -0.095 | -0.956 | -0.183 | -0.798 | -0.883 | -0.903 | -0.002 | 0.041  | -0.190 | -0.692 | -1.045 | -0.796 | -0.021 | 1 |
| JW2883 | b2916 | iciA       | 10 | -0.266 | 0.093  | 0.216  | 0.173  | -0.078 | -0.061 | 0.036  | 0.044  | 0.021  | 0.021  | -0.201 | 0.204  | -0.131 | -0.118 | -0.164 | 0.007  | 0.033  | 0.108  | 0.147  | 0.096  | 0.113  | -0.087 | 1 |
| JW2884 | b2917 | sbm        | 6  | 0.083  | 0.116  | 0.119  | -0.034 | -0.560 | -0.024 | -0.013 | -0.615 | -0.585 | 0.081  | 0.061  | 0.217  | 0.167  | 0.118  | 0.099  | -0.572 | -0.580 | -0.420 | 0.018  | 0.060  | -0.022 | -0.021 | 1 |
| JW2885 | b2918 | argK       | 11 | 0.262  | 0.117  | 0.234  | -0.755 | -4.887 | 0.060  | 0.027  | -4.523 | -4.553 | -0.067 | 0.045  | 0.112  | 0.175  | 0.129  | 0.058  | -4.903 | -4.721 | -4.730 | 0.144  | -0.116 | -0.055 | -0.097 | 1 |
| JW2886 | b2919 | ygfG       | 15 | 0.251  | -0.026 | 0.176  | -0.761 | -4.786 | 0.029  | 0.053  | -4.158 | -4.569 | -0.143 | 0.050  | 0.017  | 0.006  | 0.013  | -0.035 | -4.821 | -4.485 | -4.750 | 0.090  | -0.010 | -0.128 | -0.188 | 1 |
| JW2887 | b2920 | ygfH       | 15 | 0.052  | -0.103 | 0.206  | -0.823 | -3.670 | -0.007 | 0.058  | -3.020 | -3.599 | 0.029  | 0.017  | 0.080  | 0.019  | -0.027 | -0.032 | -3.712 | -3.573 | -3.069 | 0.180  | 0.013  | -0.015 | -0.053 | 1 |
| JW2888 | b2921 | ygfI       | 9  | -0.009 | -0.041 | 0.079  | -0.007 | -0.268 | -0.054 | 0.076  | -0.181 | -0.165 | 0.022  | 0.048  | -0.181 | -0.019 | -0.025 | -0.055 | 0.065  | -0.079 | -0.128 | 0.019  | -0.040 | -0.127 | -0.073 | 1 |
| JW2889 | b2922 | yggE       | 15 | -0.044 | 0.091  | 0.122  | -0.052 | -0.242 | -0.205 | 0.047  | -0.141 | -0.057 | -0.019 | 0.119  | -0.206 | 0.030  | 0.083  | 0.094  | -0.015 | -0.150 | 0.048  | -0.023 | 0.064  | 0.025  | 0.001  | 1 |
| JW2890 | b2923 | yggA       | 15 | -0.468 | -0.357 | -0.322 | -0.179 | -0.170 | -0.109 | -0.263 | -0.051 | 0.014  | 0.034  | 0.041  | -0.161 | -0.297 | -0.266 | -0.274 | -0.104 | -0.002 | 0.139  | -0.273 | -0.355 | -0.224 | -0.265 | 1 |
| JW2891 | b2924 | yggB       | 15 | -0.038 | -0.072 | 0.021  | 0.023  | -0.039 | -0.006 | -0.019 | -0.013 | -0.042 | 0.022  | 0.040  | 0.076  | -0.026 | -0.011 | -0.041 | -0.125 | -0.038 | 0.139  | 0.001  | -0.050 | -0.100 | -0.020 | 1 |
| JW2892 | b2925 | fbA / fbaA | 6  | 0.157  | 0.055  | 0.134  | 0.110  | -0.061 | 0.083  | 0.122  | 0.079  | -0.103 | 0.045  | 0.009  | 0.111  | 0.110  | 0.126  | 0.078  | -0.016 | -0     |        |        |        |        |        |   |

|        |       |        |    |         |         |         |         |         |         |         |         |         |         |         |         |         |         |         |         |         |         |         |         |         |         |   |
|--------|-------|--------|----|---------|---------|---------|---------|---------|---------|---------|---------|---------|---------|---------|---------|---------|---------|---------|---------|---------|---------|---------|---------|---------|---------|---|
| JW2935 | b2968 | epsM   | 15 | -2.721  | -2.404  | -2.336  | -0.981  | -0.861  | 0.003   | -2.218  | -0.578  | -0.534  | -0.082  | -0.592  | -2.443  | -0.337  | -0.390  | -0.491  | 0.016   | -0.531  | -0.462  | -0.371  | -2.912  | -0.371  | -2.555  | 1 |
| JW2936 | b2969 | exeL   | 15 | -4.813  | -4.625  | -5.082  | -0.815  | -0.558  | 0.032   | -4.566  | -0.279  | -0.157  | -0.072  | -0.437  | -4.658  | -0.042  | -0.014  | -0.079  | 0.322   | -0.239  | -0.108  | -0.041  | -5.375  | -0.180  | -4.933  | 1 |
| JW2937 | b2970 | exeC   | 15 | -5.187  | -4.636  | -5.252  | -1.228  | -0.940  | -0.053  | -4.956  | -0.522  | -0.339  | -0.370  | -0.337  | -5.085  | -4.649  | -0.278  | -0.369  | -0.064  | -0.337  | -0.381  | -0.146  | -5.507  | -0.286  | -5.322  | 1 |
| JW2938 | b2971 | 477#5  | 15 | -4.673  | -4.352  | -5.202  | -0.907  | -0.474  | -0.031  | -4.453  | -0.005  | 0.100   | -0.352  | -0.168  | -4.579  | -4.800  | -0.185  | -0.161  | 0.215   | -0.014  | -0.015  | -0.128  | -5.477  | -0.176  | -5.240  | 1 |
| JW2939 | b2972 | 477#6  | 4  | -5.504  | -5.172  | -5.854  | -1.200  | -0.713  | -0.055  | -5.213  | -0.460  | -0.275  | -0.497  | -0.542  | -5.066  | -2.332  | -0.311  | -0.317  | -0.176  | -0.425  | -0.340  | -0.372  | -6.407  | -0.464  | -5.748  | 1 |
| JW2940 | b2973 | 477#7  | 15 | -9.014  | -8.263  | -9.151  | -1.848  | -1.532  | -0.059  | -8.846  | -0.901  | -1.011  | -1.826  | -0.591  | -8.293  | -8.595  | 0.113   | 0.084   | -0.381  | -1.389  | -0.380  | 0.206   | -8.384  | -0.462  | -8.254  | 1 |
| JW2941 | b2974 | 478#1  | 15 | -8.726  | -7.732  | -8.729  | -1.077  | -0.563  | 0.116   | -8.347  | -0.799  | -0.219  | -0.036  | -1.006  | -8.178  | -8.553  | -0.388  | -0.506  | -0.835  | -0.826  | -0.675  | -0.330  | -7.099  | -0.295  | -7.866  | 1 |
| JW2942 | b2975 | yghK   | 11 | -5.827  | -5.013  | -6.507  | -0.919  | -0.389  | 0.061   | -5.563  | -0.082  | -0.005  | -0.029  | -0.130  | -5.551  | -5.519  | -0.041  | -0.133  | 0.065   | -0.063  | -0.046  | 0.021   | -1.038  | -0.060  | -5.700  | 1 |
| JW2943 | b2976 | glcB   | 5  | -8.644  | 0.043   | -9.189  | -0.997  | -0.515  | -0.045  | -7.929  | 0.078   | 0.001   | -0.082  | -0.215  | -8.170  | -8.231  | 0.074   | -0.028  | 0.127   | 0.020   | -0.028  | 0.006   | 0.018   | -0.089  | -8.498  | 1 |
| JW2944 | b2977 | glcG   | 5  | -4.899  | 0.003   | -5.147  | -0.668  | -0.254  | -0.024  | -4.332  | 0.198   | 0.131   | -0.090  | -0.151  | -4.468  | -4.852  | -0.025  | -0.013  | 0.084   | 0.145   | 0.253   | 0.057   | 0.014   | 0.032   | -5.324  | 1 |
| JW2945 | b2978 | glcF   | 5  | -4.866  | -0.134  | -2.791  | -0.711  | -0.447  | -0.038  | -2.909  | -0.031  | -0.091  | -0.062  | -0.219  | -4.639  | -2.815  | -0.351  | -0.366  | -0.021  | -0.002  | 0.093   | 0.008   | -0.110  | -0.076  | -3.173  | 1 |
| JW2946 | b2979 | glcD   | 5  | -5.792  | -0.058  | -5.663  | -0.895  | -0.356  | 0.060   | -5.138  | -0.073  | -0.155  | -0.241  | -0.116  | -5.517  | -5.760  | 0.007   | -0.056  | -0.034  | -0.199  | -0.062  | 0.057   | -0.101  | -0.111  | -5.787  | 1 |
| JW2947 | b2980 | glcC   | 5  | -5.271  | 0.072   | -5.526  | -0.687  | -0.047  | -0.053  | -4.659  | 0.018   | 0.122   | -0.059  | -0.011  | -4.974  | -5.252  | 0.094   | 0.058   | 0.223   | 0.026   | 0.167   | 0.182   | 0.069   | 0.067   | -5.300  | 1 |
| JW2948 | b2981 | 500#6  | 15 | -7.224  | -0.181  | -7.360  | -0.920  | -0.279  | -0.319  | -2.574  | -0.171  | -0.099  | -0.254  | -0.271  | -6.984  | -7.199  | -0.171  | -0.234  | 0.029   | -0.241  | -0.173  | -0.183  | -0.063  | -0.226  | -6.410  | 1 |
| JW2951 | b2983 | yghC   | 15 | -2.549  | -0.101  | -0.028  | 0.027   | -0.136  | -0.046  | -0.030  | 0.010   | 0.021   | -0.201  | -0.019  | -2.738  | -0.045  | -2.402  | -2.616  | 0.099   | 0.028   | 0.087   | -0.117  | -0.068  | -0.125  | -0.085  | 1 |
| JW2952 | b2984 | yghR   | 15 | -5.976  | 0.009   | -0.556  | -0.214  | -0.156  | -0.061  | -0.546  | -0.073  | -0.009  | -0.037  | -0.095  | -5.439  | -0.637  | -1.914  | -1.806  | 0.043   | -0.112  | -0.018  | 0.160   | -0.203  | -0.052  | -0.589  | 1 |
| JW2953 | b2985 | yghS   | 15 | -2.533  | 0.003   | -0.068  | 0.022   | -0.135  | -0.001  | -0.002  | -0.108  | -0.016  | 0.075   | -0.194  | -2.248  | -0.013  | -2.248  | -2.326  | -0.009  | -0.104  | 0.103   | 0.041   | -0.108  | -0.095  | 0.053   | 1 |
| JW2954 | b2986 | yghT   | 15 | -3.669  | -0.126  | 0.096   | -0.099  | -0.386  | 0.095   | 0.180   | 0.077   | -0.244  | -0.005  | -0.183  | -3.851  | -0.153  | -3.439  | -3.955  | -0.107  | -0.002  | 0.116   | 0.185   | 0.109   | -0.764  | 0.184   | 1 |
| JW2955 | b2987 | pitB   | 11 | -0.357  | -0.046  | 0.107   | -0.163  | -0.439  | 0.088   | 0.141   | -0.357  | -0.316  | 0.025   | -0.179  | -3.664  | 0.160   | -2.617  | -2.881  | 0.047   | -0.342  | -0.277  | 0.192   | -0.044  | -0.187  | -0.001  | 1 |
| JW2956 | b2988 | gsp    | 5  | 0.042   | 0.067   | 0.103   | 0.006   | -0.075  | 0.073   | 0.166   | -0.077  | 0.001   | -0.005  | -0.083  | 0.032   | 0.129   | 0.124   | 0.040   | 0.204   | -0.179  | 0.002   | 0.083   | 0.081   | -0.026  | 0.171   | 1 |
| JW2957 | b2989 | yghU   | 15 | -0.215  | 0.127   | 0.062   | -0.115  | -0.292  | -0.017  | 0.086   | -0.120  | -0.093  | -0.013  | 0.009   | -0.052  | -0.145  | -0.182  | -0.321  | 0.047   | 0.020   | -0.059  | 0.067   | -0.218  | -0.065  | 0.064   | 1 |
| JW2958 | b2990 | hybG   | 6  | -0.088  | 0.092   | 0.086   | 0.049   | -0.088  | -0.126  | 0.009   | -0.018  | 0.119   | -0.072  | -0.020  | -0.108  | -0.226  | -0.266  | -0.164  | 0.148   | 0.088   | 0.067   | -0.017  | -0.201  | -0.041  | 0.057   | 1 |
| JW2959 | b2991 | hybF   | 6  | -0.322  | 0.022   | 0.038   | 0.250   | 0.305   | 0.014   | -0.074  | 0.460   | 0.389   | -0.160  | -0.001  | 0.140   | -0.082  | -0.190  | 0.086   | 0.260   | 0.467   | 0.544   | 0.039   | -0.151  | -0.195  | 0.074   | 1 |
| JW2960 | b2992 | hybE   | 6  | 0.006   | 0.026   | 0.138   | 0.102   | -0.036  | -0.155  | -0.036  | -0.015  | 0.146   | -0.051  | -0.015  | 0.128   | 0.030   | -0.049  | 0.002   | 0.082   | 0.180   | 0.275   | 0.117   | -0.019  | 0.005   | 0.075   | 1 |
| JW2961 | b2993 | hybD   | 6  | 0.039   | 0.037   | 0.114   | 0.144   | -0.024  | -0.071  | -0.050  | 0.122   | 0.076   | -0.052  | -0.047  | 0.119   | 0.041   | -0.006  | -0.034  | 0.139   | 0.183   | 0.352   | 0.071   | -0.005  | -0.103  | 0.024   | 1 |
| JW2962 | b2994 | hybC   | 6  | -0.023  | -0.082  | 0.000   | 0.076   | -0.083  | 0.041   | -0.052  | -0.033  | -0.043  | 0.025   | -0.149  | 0.077   | 0.044   | -0.049  | -0.034  | 0.020   | 0.056   | 0.073   | -0.012  | -0.060  | 0.000   | -0.013  | 1 |
| JW2963 | b2995 | hybB   | 6  | -0.045  | -0.040  | 0.048   | 0.069   | -0.126  | 0.004   | 0.080   | 0.026   | -0.052  | -0.003  | -0.096  | -0.053  | 0.085   | -0.069  | 0.010   | 0.196   | 0.022   | 0.069   | 0.045   | -0.037  | -0.018  | 0.000   | 1 |
| JW2964 | b2996 | hybA   | 6  | -0.411  | -0.096  | 0.044   | 0.041   | -0.244  | -0.157  | -0.083  | 0.039   | 0.085   | 0.046   | 0.021   | 0.158   | -0.135  | -0.095  | -0.063  | 0.142   | 0.086   | 0.211   | -0.061  | 0.093   | -0.006  | -0.018  | 1 |
| JW2965 | b2997 | hoxK   | 6  | -0.068  | -0.067  | 0.043   | 0.095   | -0.075  | 0.000   | -0.158  | 0.042   | 0.101   | 0.003   | 0.024   | 0.018   | -0.072  | 0.001   | -0.126  | 0.071   | 0.069   | 0.204   | -0.144  | 0.054   | -0.086  | -0.133  | 1 |
| JW2966 | b2998 | yghW   | 15 | -0.049  | 0.063   | 0.178   | 0.117   | 0.070   | -0.100  | 0.201   | 0.127   | 0.176   | 0.136   | 0.172   | 0.153   | -0.082  | 0.010   | 0.005   | 0.226   | 0.172   | 0.326   | -0.013  | 0.084   | 0.194   | 0.141   | 1 |
| JW2967 | b2999 | 504#11 | 15 | -0.038  | -0.014  | 0.206   | 0.109   | -0.024  | -0.131  | 0.167   | -0.299  | 0.002   | 0.226   | 0.190   | 0.045   | -0.310  | -0.219  | -0.243  | 0.150   | -0.014  | 0.412   | -0.009  | -0.074  | 0.069   | 0.016   | 1 |
| JW2968 | b3000 | 504#12 | 15 | -0.023  | -0.090  | -0.054  | 0.036   | -0.034  | 0.002   | 0.009   | -0.480  | 0.055   | -0.061  | 0.028   | -0.016  | -0.082  | 0.004   | -0.067  | -0.012  | -0.093  | 0.120   | -0.043  | -0.267  | -0.047  | -0.223  | 1 |
| JW2970 | b3001 | (yajO) | 15 | -0.119  | 0.034   | 0.037   | -0.043  | -0.191  | -0.055  | 0.008   | -0.187  | -0.154  | 0.001   | -0.094  | -0.166  | -0.075  | -0.065  | -0.098  | 0.030   | -0.157  | -0.141  | 0.016   | -0.069  | -0.147  | -0.109  | 1 |
| JW2971 | b3002 | yqhA   | 15 | -0.130  | 0.078   | 0.061   | 0.101   | 0.061   | -0.038  | 0.248   | 0.120   | 0.185   | 0.040   | 0.051   | -0.135  | 0.022   | 0.198   | 0.116   | 0.318   | 0.108   | 0.345   | -0.056  | 0.050   | 0.132   | 0.184   | 1 |
| JW2972 | b3003 | yqhA   | 5  | -0.066  | 0.040   | 0.163   | 0.064   | -0.227  | 0.038   | 0.026   | 0.009   | -0.141  | 0.046   | 0.118   | 0.237   | -0.013  | 0.051   | -0.042  | 0.077   | 0.012   | 0.042   | 0.020   | -0.009  | -0.173  | 0.040   | 1 |
| JW2973 | b3005 | extD   | 11 | 0.085   | 0.031   | 0.189   | 0.101   | -0.147  | -0.077  | 0.070   | -0.156  | -0.098  | 0.034   | 0.029   | 0.099   | 0.070   | 0.073   | 0.036   | 0.066   | -0.075  | 0.105   | 0.147   | 0.065   | -0.026  | 0.062   | 1 |
| JW2974 | b3006 | extB   | 11 | -0.017  | 0.048   | 0.015   | 0.019   | -0.042  | -0.021  | -0.014  | -0.032  | -0.059  | 0.008   | -0.130  | -0.108  | -0.170  | -0.066  | -0.065  | 0.086   | -0.054  | 0.045   | -0.002  | -0.141  | 0.090   | 0.012   | 1 |
| JW2975 | b3008 | metC   | 1  | 0.006   | 0.036   | 0.021   | 0.024   | 0.054   | -0.010  | 0.079   | 0.161   | 0.083   | 0.090   | -0.029  | -0.086  | 0.062   | 0.055   | 0.036   | -0.027  | 0.157   | 0.362   | -0.020  | -0.032  | 0.119   | 1       |   |
| JW2976 | b3009 | yghB   | 15 | 0.104   | 0.148   | 0.212   | 0.076   | 0.105   | -0.093  | 0.179   | 0.103   | 0.209   | -0.019  | -0.025  | -0.020  | 0.144   | 0.103   | 0.093   | 0.231   | 0.233   | 0.270   | 0.173   | 0.178   | 0.122   | 0.152   | 1 |
| JW2977 | b3010 | exsA   | 15 | -0.311  | -0.029  | 0.130   | 0.199   | 0.061   | -0.126  | -0.091  | 0.048   | 0.195   | -0.028  | 0.126   | 0.181   | 0.053   | -0.030  | 0.009   | 0.111   | -0.015  | 0.261   | 0.068   | 0.137   | 0.054   | 0.039   | 1 |
| JW2978 | b3011 | yqhD   | 6  | -0.149  | 0.130   | 0.148   | 0.215   | 0.094   | -0.030  | -0.001  | 0.159   | 0.208   | 0.095   | 0.103   | 0.308   | 0.086   | 0.205   | 0.102   | 0.241   | 0.308   | 0.450   | 0.035   | 0.085   | 0.064   | 0.140   | 1 |
| JW2979 | b3012 | yghE   | 15 | 0.350   | 0.235   | 0.091   | 0.135   | 0.211   | -0.026  | 0.151   | 0.173   | 0.255   | 0.101   | 0.107   | 0.155   | 0.328   | 0.392   | 0.326   | 0.330   | 0.218   | 0.288   | 0.088   | -0.374  | 0.167   | 0.288   | 1 |
| JW2980 | b3013 | (yqhC) | 15 | -0.410  | -0.186  | -0.203  | -0.195  | -0.393  | -0.069  | -0.199  | -0.363  | -0.257  | 0.012   | -0.170  | -0.067  | -0.112  | -0.192  | -0.212  | -0.471  | -0.218  | -0.066  | -0.285  | -0.627  | -0.251  | -0.443  | 1 |
| JW2981 | b3013 | yqhC   | 15 | 0.142   | 0.178   | 0.132   | 0.173   | -0.072  | -0.186  | 0.188   | 0.113   | 0.176   | 0.130   | 0.026   | 0.064   | 0.210   | 0.146   | 0.215   | 0.205   | 0.272   | 0.312   | 0.118   | 0.061   | 0.173   | 0.182   | 1 |
| JW2982 | b3014 | yqhH   | 3  | Invalid | 1 |
| JW2983 | b3015 | ygiQ   | 15 | -0.537  | -0.345  | -0.161  | -0.110  | -0.155  | -0.121  | -0.271  | -0.059  | 0.023   | -0.018  | 0.099   | -0.104  | -0.195  | -0.325  | -0.225  | -0.050  | -0.116  | 0.048   | -0.124  | -0.434  | -0.445  | -0.260  | 1 |
| JW2984 | b3016 | ygiR   | 15 | -0.122  | -0.273  | 0.052   | -0.092  | -0.385  | -0.019  | -0.028  | -0.175  | -0.265  | -0.041  | -0.065  | -0.085  | -0.161  | -0.082  | -0.130  | -0.065  | -0.175  | -0.157  | -0.006  | -0.226  | -0.220  | 0.077   | 1 |
| JW2985 | b3017 |        |    |         |         |         |         |         |         |         |         |         |         |         |         |         |         |         |         |         |         |         |         |         |         |   |



|        |       |            |    |        |        |        |         |        |        |        |        |        |        |        |        |        |        |        |        |         |         |         |         |         |        |  |   |
|--------|-------|------------|----|--------|--------|--------|---------|--------|--------|--------|--------|--------|--------|--------|--------|--------|--------|--------|--------|---------|---------|---------|---------|---------|--------|--|---|
| JW3030 | b3058 | foiB       | 14 | 0.117  | 0.088  | 0.168  | 0.157   | 0.213  | 0.111  | 0.097  | 0.255  | 0.234  | -0.148 | -0.024 | 0.076  | 0.050  | 0.131  | 0.075  | 0.217  | 0.233   | 0.280   | 0.175   | 0.106   | 0.095   | 0.064  |  | 1 |
| JW3031 | b3059 | ygIH       | 15 | -0.094 | 0.055  | -0.009 | 0.041   | 0.064  | 0.056  | 0.049  | 0.109  | 0.058  | 0.011  | 0.027  | 0.008  | 0.052  | -0.016 | -0.018 | 0.156  | 0.112   | 0.044   | 0.076   | -0.005  | -0.073  | 0.094  |  | 1 |
| JW3032 | b3060 | ygIP       | 9  | -0.220 | 0.045  | 0.084  | 0.238   | 0.269  | -0.109 | -0.044 | 0.119  | 0.369  | -0.081 | 0.084  | 0.148  | 0.148  | 0.022  | 0.174  | 0.130  | 0.194   | 0.287   | 0.089   | 0.128   | 0.126   | 0.133  |  | 1 |
| JW3033 | b3061 | ttfA       | 6  | -0.229 | -0.073 | 0.083  | 0.091   | -0.053 | -0.054 | -0.166 | -0.017 | -0.071 | -0.027 | 0.018  | 0.051  | -0.133 | -0.193 | -0.133 | -0.079 | 0.027   | -0.071  | 0.052   | -0.089  | -0.035  | -0.033 |  | 1 |
| JW3034 | b3062 | ttfB       | 6  | 0.015  | -0.054 | -0.016 | -0.023  | -0.259 | -0.002 | -0.086 | -0.222 | -0.235 | -0.019 | 0.035  | 0.001  | -0.010 | -0.017 | -0.024 | -0.168 | -0.224  | -0.105  | -0.074  | -0.087  | -0.130  | -0.106 |  | 1 |
| JW3035 | b3063 | ygJE       | 15 | 0.016  | -0.064 | -0.037 | 0.108   | -0.023 | 0.056  | -0.051 | 0.021  | -0.029 | -0.058 | -0.013 | -0.071 | 0.017  | -0.007 | -0.011 | 0.120  | 0.080   | 0.086   | -0.001  | -0.040  | -0.108  | -0.049 |  | 1 |
| JW3036 | b3064 | ygJD       | 15 | -0.057 | -0.097 | -0.143 | -0.094  | -0.190 | -0.071 | -0.193 | -0.298 | -0.237 | -0.028 | -0.102 | -0.408 | -0.331 | -0.421 | -0.330 | -0.187 | -0.206  | -0.163  | -0.099  | -0.312  | -0.253  | -0.336 |  | 1 |
| JW3037 | b3065 | rpsU       | 12 | 0.133  | 0.150  | 0.316  | Invalid | 0.125  | -0.075 | 0.131  | 0.074  | 0.273  | -0.022 | 0.004  | 0.004  | 0.154  | 0.105  | 0.102  | 0.292  | Invalid | 0.397   | Invalid | Invalid | 0.120   |        |  | 1 |
| JW3038 | b3066 | dnaG       | 10 | -0.143 | 0.058  | 0.089  | 0.182   | 0.270  | -0.105 | 0.018  | 0.214  | 0.289  | -0.014 | 0.086  | 0.176  | 0.005  | -0.055 | 0.137  | 0.112  | 0.126   | 0.226   | 0.229   | 0.018   | -0.054  | 0.079  |  | 1 |
| JW3039 | b3067 | rpoD       | 9  | 0.172  | 0.113  | 0.286  | 0.185   | 0.306  | 0.080  | 0.130  | 0.206  | 0.274  | -0.027 | 0.054  | -0.029 | 0.096  | -0.029 | 0.195  | 0.286  | 0.283   | 0.260   | 0.084   | 0.085   | 0.041   |        |  | 1 |
| JW3040 | b3068 | ygjF       | 15 | -0.109 | -0.026 | -0.063 | -0.160  | -0.158 | -0.071 | -0.115 | -0.155 | 0.001  | -0.140 | -0.047 | 0.157  | -0.070 | -0.014 | 0.038  | -0.198 | -0.026  | 0.280   | -0.073  | 0.046   | 0.129   | -0.033 |  | 1 |
| JW3041 | b3070 | ygjH       | 15 | 0.165  | -0.038 | 0.146  | 0.071   | 0.079  | 0.017  | 0.055  | 0.047  | 1.264  | -0.062 | 0.010  | -0.058 | 0.106  | 0.108  | 0.072  | 0.023  | 0.110   | 0.243   | 0.094   | 0.041   | 0.157   | 0.053  |  | 1 |
| JW3042 | b3071 | ygjI       | 15 | 0.006  | -0.074 | 0.081  | -0.103  | -0.189 | 0.093  | 0.052  | -0.048 | 1.074  | -0.040 | -0.019 | 0.027  | -0.030 | 0.131  | 0.045  | -0.105 | 0.014   | 0.083   | -0.066  | 0.013   | -0.076  | 0.086  |  | 1 |
| JW3043 | b3072 | aer        | 4  | 0.002  | 0.039  | 0.080  | 0.055   | 0.139  | 0.058  | 0.095  | -0.077 | 1.336  | -0.007 | 0.012  | -0.158 | 0.068  | -0.050 | -0.008 | 0.054  | 0.005   | -0.020  | 0.126   | 0.034   | -0.057  | 0.042  |  | 1 |
| JW3044 | b3073 | ygjG / oat | 1  | -0.104 | 0.178  | 0.057  | -0.023  | -0.033 | -0.012 | 0.123  | 0.028  | 1.159  | -0.048 | -0.015 | -0.085 | 0.107  | -0.033 | 0.023  | -0.019 | 0.055   | 0.098   | 0.224   | 0.010   | -0.216  | 0.123  |  | 1 |
| JW3045 | b3074 | ygjH       | 15 | -0.259 | -0.077 | 0.068  | 0.016   | 0.000  | -0.125 | -0.088 | 0.021  | 1.333  | -0.129 | 0.048  | 0.129  | -0.040 | -0.247 | 0.005  | 0.003  | 0.196   | 0.041   | -0.030  | 0.041   | 0.049   | -0.032 |  | 1 |
| JW3046 | b3075 | ebgR       | 6  | -0.185 | 0.100  | -0.015 | 0.021   | -0.138 | -0.148 | -0.089 | -0.200 | 0.921  | 0.003  | -0.071 | -0.032 | -0.222 | -0.071 | -0.005 | -0.158 | -0.099  | -0.061  | 0.000   | -0.190  | -0.075  | -0.132 |  | 1 |
| JW3047 | b3076 | ebgA       | 6  | 0.118  | 0.074  | 0.178  | 0.185   | -0.009 | 0.044  | 0.084  | 0.006  | 1.360  | -0.051 | 0.050  | 0.052  | 0.111  | 0.102  | 0.119  | 0.068  | 0.063   | 0.144   | 0.107   | 0.035   | 0.079   | -0.082 |  | 1 |
| JW3048 | b3077 | ebgC       | 6  | 0.132  | 0.078  | 0.185  | 0.192   | 0.229  | -0.013 | 0.095  | 0.122  | 1.471  | -0.040 | 0.030  | -0.029 | 0.163  | 0.155  | 0.161  | 0.193  | 0.292   | 0.302   | 0.150   | 0.081   | -0.219  | 0.081  |  | 1 |
| JW3049 | b3078 | ygjI       | 15 | 0.184  | 0.126  | 0.207  | 0.192   | 0.204  | -0.021 | 0.182  | 0.154  | 1.571  | -0.025 | 0.033  | -0.148 | 0.093  | 0.091  | 0.111  | 0.375  | 0.200   | 0.245   | 0.219   | 0.038   | -0.241  | 0.128  |  | 1 |
| JW3050 | b3079 | ygjJ       | 15 | -0.182 | 0.109  | 0.097  | 0.007   | -0.183 | -0.100 | 0.147  | -0.214 | 1.141  | 0.050  | 0.040  | -0.013 | 0.256  | 0.110  | 0.100  | -0.011 | -0.138  | -0.016  | 0.065   | -0.229  | -3.616  | 0.089  |  | 1 |
| JW3051 | b3080 | ygjK       | 15 | -0.380 | -0.172 | 0.107  | -0.054  | -0.171 | -0.054 | 0.004  | -0.173 | 1.214  | -0.015 | 0.020  | 0.186  | -0.021 | -0.124 | 0.088  | -0.368 | -0.063  | -0.231  | 0.133   | -0.064  | -7.139  | 0.062  |  | 1 |
| JW3052 | b3081 | fadh       | 6  | -0.340 | -0.372 | -0.383 | -0.269  | -0.190 | 0.027  | -0.291 | -0.211 | 1.136  | -0.157 | -0.072 | 0.124  | -0.278 | -0.222 | -0.158 | -0.413 | -0.356  | -0.306  | -0.303  | -0.526  | -6.977  | -0.217 |  | 1 |
| JW3053 | b3082 | ygjM       | 15 | 0.090  | -0.007 | 0.002  | -0.053  | -0.157 | 0.003  | 0.014  | -0.266 | 1.246  | -0.089 | 0.020  | 0.220  | 0.051  | 0.082  | 0.066  | -0.015 | 0.138   | 0.187   | -0.111  | 0.053   | -3.796  | 0.148  |  | 1 |
| JW3054 | b3083 | ygjN       | 15 | 0.165  | -2.200 | -2.621 | -2.373  | -2.615 | 0.015  | -2.202 | -2.296 | -1.328 | -0.159 | -0.024 | 0.035  | -0.064 | 0.067  | 0.033  | -2.593 | -2.515  | -2.521  | -2.116  | 0.041   | -1.796  | 0.058  |  | 1 |
| JW3055 | b3084 | ygjO       | 15 | -0.405 | -0.210 | -0.104 | -0.128  | -0.315 | -0.133 | -0.240 | -0.179 | 1.167  | 0.032  | 0.093  | 0.162  | -0.175 | -0.248 | -0.073 | -0.242 | -0.176  | -0.138  | -0.073  | -0.095  | -0.040  | -0.093 |  | 1 |
| JW3056 | b3085 | ygjP       | 15 | -0.055 | -0.187 | -0.182 | -0.163  | -0.319 | -0.095 | -0.188 | -0.710 | 1.077  | 0.076  | 0.055  | 0.191  | -0.052 | -0.067 | -0.023 | -0.210 | -0.180  | -0.108  | -0.139  | -0.170  | -0.049  | -0.224 |  | 1 |
| JW3057 | b3086 | ygjQ       | 15 | -0.474 | -0.250 | -0.211 | -0.198  | -0.428 | -0.027 | -0.205 | -0.454 | 0.868  | 0.047  | 0.056  | 0.223  | -0.131 | -0.152 | -0.168 | -0.381 | -0.367  | -0.568  | -0.203  | -0.104  | -0.008  | -0.200 |  | 1 |
| JW3058 | b3087 | ygjR       | 15 | -0.259 | -0.169 | -0.120 | -0.130  | -0.299 | -0.001 | -0.065 | -0.316 | 1.019  | -0.004 | 0.014  | 0.091  | -0.095 | -0.119 | -0.107 | 0.082  | -0.298  | -0.309  | -0.078  | -0.211  | -0.139  | -0.169 |  | 1 |
| JW3059 | b3088 | ygjT       | 15 | 0.053  | 0.040  | 0.184  | 0.103   | 0.003  | -0.018 | 0.207  | 0.008  | 1.312  | 0.038  | 0.040  | 0.012  | 0.153  | 0.071  | 0.124  | 0.174  | 0.073   | 0.129   | 0.173   | 0.124   | 0.104   | 0.127  |  | 1 |
| JW3060 | b3089 | ygjU       | 15 | -0.045 | -0.116 | 0.049  | -0.013  | -0.124 | -0.103 | 0.015  | -0.141 | 1.101  | -0.009 | 0.023  | -0.003 | -0.059 | -0.027 | -0.066 | 0.025  | -0.070  | 0.077   | 0.014   | 0.058   | -0.150  | -0.105 |  | 1 |
| JW3061 | b3090 | ygjV       | 15 | -0.063 | -0.033 | -0.007 | 0.003   | -0.069 | -0.234 | -0.028 | -0.038 | 1.493  | -0.019 | 0.024  | 0.136  | -0.096 | -0.069 | -0.029 | 0.054  | 0.024   | -0.319  | -0.004  | -0.032  | 0.099   | 0.052  |  | 1 |
| JW3062 | b3091 | uxaA       | 6  | -0.114 | -0.165 | 0.039  | -0.197  | -0.105 | 0.077  | -0.030 | -0.116 | 1.216  | 0.016  | 0.026  | -0.112 | -0.045 | 0.010  | -0.019 | -0.102 | -0.040  | -0.007  | -0.029  | -0.068  | -0.147  | -0.012 |  | 1 |
| JW3063 | b3092 | uxaC       | 6  | 0.037  | 0.163  | -0.002 | 0.036   | 0.099  | 0.023  | 0.130  | 0.007  | 1.461  | 0.035  | 0.020  | 0.076  | 0.096  | 0.100  | 0.015  | 0.199  | 0.193   | 0.108   | 0.115   | 0.097   | 0.018   | 0.090  |  | 1 |
| JW3064 | b3093 | uxaT       | 11 | 0.144  | 0.035  | 0.096  | 0.101   | -0.031 | -0.094 | 0.042  | -0.034 | 1.348  | 0.031  | 0.012  | 0.118  | -0.011 | -0.016 | -0.031 | 0.071  | 0.134   | 0.143   | 0.080   | 0.034   | 0.056   | 0.029  |  | 1 |
| JW3065 | b3094 | exuR       | 6  | -0.310 | -0.094 | -0.176 | -0.245  | -0.443 | -0.183 | 0.006  | -0.163 | 0.959  | 0.040  | 0.116  | -0.134 | 0.015  | 0.091  | 0.051  | 0.176  | 0.107   | 0.142   | -0.289  | -0.226  | -0.067  | -0.165 |  | 1 |
| JW3066 | b3095 | ygjA       | 15 | 0.171  | 0.038  | 0.053  | 0.092   | 0.114  | 0.048  | 0.184  | 0.125  | 1.422  | -0.033 | 0.070  | 0.146  | 0.072  | 0.230  | 0.092  | 0.128  | 0.074   | 0.048   | -0.275  | -0.096  | 0.105   | 0.041  |  | 1 |
| JW3067 | b3096 | ygjB       | 15 | 0.025  | -0.235 | -0.279 | -0.236  | -0.192 | -0.055 | -0.184 | -0.219 | 1.090  | -0.010 | 0.049  | -0.043 | 0.123  | 0.137  | 0.071  | -0.129 | -0.193  | -0.182  | -0.271  | 0.032   | -0.253  | 0.089  |  | 1 |
| JW3068 | b3097 | ygjC       | 15 | 0.078  | -0.024 | -0.047 | -0.065  | -0.022 | -0.045 | -0.029 | -0.017 | 1.409  | -0.069 | 0.101  | -0.057 | 0.136  | 0.164  | 0.052  | 0.096  | 0.014   | 0.024   | -0.149  | 0.026   | -0.030  | 0.167  |  | 1 |
| JW3069 | b3098 | ygjD       | 15 | -0.101 | -0.031 | 0.030  | 0.231   | 0.247  | -0.122 | -0.081 | 0.288  | 1.642  | 0.081  | 0.171  | 0.265  | 0.034  | 0.087  | 0.041  | 0.351  | 0.352   | 0.480   | -0.032  | 0.050   | 0.154   | 0.011  |  | 1 |
| JW3070 | b3099 | ygjE       | 15 | -0.162 | -0.142 | -0.078 | 0.019   | -0.149 | -0.048 | -0.153 | -0.155 | 1.105  | 0.046  | 0.083  | 0.015  | 0.000  | -0.004 | -0.069 | -0.099 | -0.082  | 0.012   | -0.121  | -0.255  | -0.140  | -0.092 |  | 1 |
| JW3071 | b3100 | ygjK       | 15 | 0.077  | 0.020  | 0.162  | 0.099   | -0.100 | 0.006  | -0.058 | -0.095 | 0.693  | 0.033  | 0.041  | 0.117  | 0.037  | 0.038  | -0.073 | 0.084  | 0.005   | 0.092   | 0.023   | -0.005  | -0.016  | -0.077 |  | 1 |
| JW3072 | b3101 | ygjF       | 15 | 0.077  | -0.065 | -0.034 | -0.121  | -0.453 | -0.111 | 0.022  | 0.095  | 0.912  | -0.088 | -0.009 | 0.080  | 0.051  | 0.095  | -0.072 | -0.053 | -0.271  | -0.127  | -0.059  | -0.539  | 0.077   | -0.034 |  | 1 |
| JW3073 | b3102 | ygjG       | 15 | -0.035 | -0.177 | -0.066 | -0.088  | -0.134 | -0.002 | -0.076 | -0.118 | 1.146  | 0.009  | 0.031  | -0.127 | -0.159 | -0.117 | -0.123 | -0.071 | -0.087  | -0.044  | -0.048  | -0.131  | -0.105  | -0.036 |  | 1 |
| JW3074 | b3103 | yhaH       | 15 | 0.179  | 0.005  | 0.153  | Invalid | -0.041 | 0.162  | 0.255  | 0.256  | 1.156  | 0.018  | 0.122  | 0.252  | 0.219  | 0.392  | 0.245  | 0.269  | 0.236   | Invalid | 0.015   | Invalid | Invalid | 0.196  |  | 1 |
| JW3075 | b3104 | yhaI       | 15 | 0.025  | -0.748 | -0.942 | -1.225  | -1.840 | -0.054 | -0.722 | -1.624 | -1.240 | 0.005  | 0.061  | 0.007  | -0.803 | -0.661 | -0.813 | -1.988 | -1.651  | -1.772  | -0.752  | -2.048  | -1.991  | 0.062  |  | 1 |
| JW3076 | b3105 | yhaJ       | 9  | 0.133  |        |        |         |        |        |        |        |        |        |        |        |        |        |        |        |         |         |         |         |         |        |  |   |

|        |       |             |    |        |        |        |        |        |        |        |        |        |        |        |        |        |        |        |        |        |        |        |        |        |        |   |   |
|--------|-------|-------------|----|--------|--------|--------|--------|--------|--------|--------|--------|--------|--------|--------|--------|--------|--------|--------|--------|--------|--------|--------|--------|--------|--------|---|---|
| JW3119 | b3150 | yraP        | 15 | 0.030  | -0.139 | -0.106 | -0.088 | -0.002 | 0.102  | -0.041 | 0.005  | -0.066 | 0.004  | -0.010 | -0.009 | -0.125 | -0.107 | -0.188 | -0.050 | 0.034  | -0.105 | -0.152 | -0.137 | -0.024 | -0.155 |   | 1 |
| JW3120 | b3151 | yraQ        | 15 | 0.038  | -0.131 | -0.056 | 0.018  | 0.092  | 0.040  | 0.013  | -0.058 | 0.080  | -0.070 | -0.064 | -0.118 | -0.125 | -0.186 | -0.161 | 0.077  | 0.149  | 0.037  | -0.189 | -0.089 | -0.177 | -0.058 |   | 1 |
| JW3121 | b3152 | yraR        | 15 | -0.174 | -0.186 | -0.083 | -0.107 | -0.211 | 0.040  | -0.256 | -0.051 | -0.205 | -0.130 | -0.026 | 0.171  | -0.366 | -0.269 | -0.268 | -0.212 | -0.067 | -0.114 | -0.129 | -0.080 | -0.137 | -0.287 |   | 1 |
| JW3122 | b3153 | yhbO        | 15 | -0.194 | -0.251 | -0.172 | -1.116 | -4.430 | 0.072  | -0.283 | -0.340 | -3.989 | -0.013 | 0.030  | 0.185  | -0.342 | -0.220 | -0.312 | -0.283 | -0.211 | 0.013  | -0.222 | -0.254 | -0.100 | -0.274 |   | 1 |
| JW3123 | b3154 | yhbP        | 15 | -0.025 | -0.130 | -0.061 | -0.154 | -0.305 | 0.112  | -0.123 | -0.118 | -0.416 | -0.076 | 0.022  | 0.102  | -0.019 | 0.083  | -0.066 | -0.283 | -0.281 | 0.001  | -0.114 | 0.053  | -0.168 | -0.195 |   | 1 |
| JW3124 | b3155 | yhbQ        | 15 | 0.228  | 0.072  | 0.124  | 0.079  | -0.050 | -0.067 | 0.083  | -0.012 | 0.060  | -0.042 | 0.001  | 0.034  | -0.136 | -0.141 | -0.251 | 0.237  | 0.668  | -0.057 | 0.087  | -0.148 | -0.172 | -0.126 |   | 1 |
| JW3125 | b3156 | yhbS        | 15 | -0.208 | -0.039 | -0.157 | -0.025 | -0.158 | -0.128 | -0.181 | -0.182 | -0.162 | -0.036 | -0.153 | -0.094 | -0.137 | -0.110 | -0.128 | -0.164 | -0.153 | -0.137 | -0.144 | -0.123 | -0.076 | -0.101 |   | 1 |
| JW3126 | b3157 | yhbT        | 15 | 0.081  | -0.003 | 0.061  | 0.192  | 0.136  | 0.131  | 0.102  | 0.234  | 0.103  | 0.032  | 0.058  | 0.155  | 0.082  | 0.126  | 0.047  | 0.241  | 0.165  | 0.194  | -0.019 | 0.055  | 0.014  | 0.047  |   | 1 |
| JW3127 | b3158 | yhbU        | 15 | 0.032  | -0.052 | 0.069  | 0.181  | 0.143  | 0.166  | 0.039  | 0.197  | 0.116  | 0.034  | 0.046  | 0.022  | -0.107 | -0.030 | -0.185 | -0.031 | -0.080 | 0.141  | 0.019  | -0.162 | -0.228 | -0.270 |   | 1 |
| JW3128 | b3159 | yhbV        | 15 | -0.042 | -0.172 | -0.042 | -0.025 | -0.176 | 0.068  | -0.038 | 0.031  | -0.009 | 0.071  | 0.026  | 0.044  | -0.102 | -0.072 | -0.164 | 0.047  | 0.126  | 0.171  | -0.146 | -0.164 | -0.138 | -0.153 |   | 1 |
| JW3129 | b3160 | yhbW        | 15 | -0.183 | -0.150 | -0.130 | -0.228 | -0.476 | 0.032  | -0.144 | -0.363 | -0.354 | -0.083 | -0.003 | -0.324 | -0.340 | -0.365 | -0.359 | -0.452 | -0.275 | -0.421 | -0.237 | -0.187 | -0.116 | -0.185 |   | 1 |
| JW3130 | b3161 | mtr         | 11 | -0.339 | -0.268 | -0.515 | -0.309 | -0.410 | -0.019 | -0.293 | -0.472 | -0.306 | -0.032 | -0.023 | -0.161 | -0.291 | -0.224 | -0.239 | -0.490 | -0.427 | -0.401 | -0.386 | -0.275 | -0.368 | -0.254 |   | 1 |
| JW3131 | b3162 | dehD        | 13 | -0.002 | -0.047 | 0.216  | 0.119  | 0.041  | 0.112  | 0.108  | 0.021  | -0.017 | 0.036  | 0.045  | 0.107  | 0.093  | 0.183  | 0.100  | -0.092 | 0.075  | -0.002 | 0.159  | -0.094 | 0.038  | 0.052  |   | 1 |
| JW3132 | b3163 | nlpI / yhbM | 15 | 0.139  | 0.143  | 0.191  | 0.234  | 0.253  | 0.066  | 0.194  | 0.304  | 0.292  | -0.002 | 0.068  | 0.042  | 0.082  | 0.153  | 0.007  | 0.327  | 0.285  | 0.340  | 0.113  | 0.147  | 0.087  | 0.102  |   | 1 |
| JW3133 | b3164 | pnp         | 13 | 0.005  | 0.091  | 0.098  | 0.048  | -0.035 | 0.016  | -0.038 | -0.115 | 0.027  | -0.113 | 0.096  | -0.054 | 0.023  | 0.069  | 0.027  | 0.174  | 0.077  | 0.024  | -0.012 | 0.011  | 0.036  | 0.021  |   | 1 |
| JW3134 | b3165 | rpsO        | 12 | -0.078 | 0.057  | 0.129  | 0.037  | 0.213  | -0.066 | 0.025  | 0.157  | 0.252  | -0.076 | -0.052 | 0.269  | -0.012 | 0.015  | 0.004  | 0.114  | 0.242  | 0.269  | 0.142  | -0.039 | 0.092  | 0.051  |   | 1 |
| JW3135 | b3166 | trubB       | 12 | -0.196 | -0.238 | -0.313 | -0.270 | -0.219 | 0.037  | -0.212 | -0.231 | -0.148 | 0.051  | 0.000  | 0.272  | -0.267 | -0.133 | -0.239 | -0.362 | -0.255 | -0.240 | -0.237 | -0.285 | -0.207 | -0.244 |   | 1 |
| JW3136 | b3167 | rfaA        | 12 | 0.056  | 0.064  | 0.188  | -0.014 | 0.334  | 0.131  | 0.097  | 0.337  | 0.214  | -0.162 | 0.005  | 0.158  | 0.096  | 0.159  | 0.071  | 0.181  | 0.242  | 0.282  | 0.068  | 0.068  | -0.023 | 0.043  |   | 1 |
| JW3137 | b3168 | infB        | 12 | 0.093  | -0.082 | 0.055  | 0.046  | 0.195  | 0.131  | 0.061  | 0.129  | 0.061  | -0.101 | 0.010  | 0.105  | -0.031 | -0.057 | -0.106 | 0.109  | 0.086  | 0.122  | 0.143  | -0.046 | 0.017  | -0.046 |   | 1 |
| JW3138 | b3169 | nusA        | 13 | -0.021 | 0.088  | 0.112  | 0.052  | 0.202  | 0.117  | 0.087  | 0.193  | 0.171  | 0.041  | 0.052  | 0.067  | 0.109  | 0.154  | 0.074  | 0.215  | 0.234  | 0.240  | 0.002  | -0.031 | 0.005  | 0.191  |   | 1 |
| JW3139 | b3170 | yhbC        | 15 | 0.189  | 0.161  | 0.204  | 0.062  | 0.357  | -0.010 | 0.245  | 0.232  | 0.359  | -0.054 | 0.058  | -0.076 | 0.056  | 0.055  | 0.051  | 0.366  | 0.298  | 0.281  | 0.113  | 0.109  | 0.186  | 0.220  |   | 1 |
| JW3140 | b3172 | argG        | 1  | -0.212 | 0.019  | 0.167  | 0.117  | -0.025 | -0.006 | 0.038  | 0.046  | 0.061  | 0.045  | 0.088  | 0.273  | -0.012 | 0.132  | 0.137  | 0.012  | 0.057  | 0.057  | 0.097  | 0.074  | 0.109  | 0.096  |   | 1 |
| JW3141 | b3173 | yhbX        | 15 | -0.076 | 0.119  | -0.096 | 0.155  | 0.103  | -0.023 | -0.066 | 0.138  | 0.201  | -0.017 | 0.057  | 0.254  | 0.038  | 0.167  | 0.203  | 0.236  | 0.188  | 0.226  | -0.180 | 0.001  | -5.176 | -0.016 |   | 1 |
| JW3142 | b3175 | secG        | 4  | -0.325 | 0.116  | 0.004  | 0.109  | 0.112  | -0.032 | 0.105  | 0.079  | 0.194  | -0.106 | 0.079  | 0.271  | 0.219  | 0.245  | 0.230  | 0.377  | 0.286  | 0.406  | -0.011 | 0.194  | 0.389  | 0.224  |   | 1 |
| JW3143 | b3176 | mrsA        | 5  | -0.277 | 0.038  | 0.131  | 0.148  | 0.005  | -0.024 | 0.020  | 0.030  | 0.086  | -0.039 | 0.041  | 0.189  | 0.008  | 0.141  | 0.138  | 0.000  | 0.090  | 0.161  | 0.117  | 0.074  | 0.089  | 0.034  |   | 1 |
| JW3144 | b3177 | foiP        | 2  | 0.057  | 0.094  | 0.115  | 0.195  | 0.174  | 0.080  | 0.050  | 0.262  | 0.131  | -0.090 | 0.029  | 0.113  | 0.011  | 0.173  | 0.104  | 0.180  | 0.196  | 0.210  | 0.021  | 0.079  | 0.106  | -0.050 |   | 1 |
| JW3145 | b3178 | ftsH        | 4  | 0.173  | 0.023  | 0.170  | 0.271  | 0.284  | 0.134  | 0.119  | 0.249  | 0.224  | 0.014  | 0.062  | 0.205  | 0.107  | 0.137  | 0.034  | 0.359  | 0.318  | 0.253  | 0.155  | 0.094  | 0.099  | 0.059  |   | 1 |
| JW3146 | b3179 | ftsJ / rrmJ | 4  | 0.223  | 0.101  | 0.174  | 0.261  | 0.416  | 0.135  | 0.232  | 0.372  | 0.326  | -0.051 | 0.108  | 0.108  | 0.144  | 0.273  | 0.147  | 0.366  | 0.297  | 0.346  | 0.079  | 0.042  | 0.176  | 0.145  |   | 1 |
| JW3147 | b3180 | yhbY        | 15 | 0.160  | 0.182  | 0.354  | 0.198  | 0.198  | 0.007  | 0.235  | 0.258  | 0.348  | 0.059  | 0.094  | 0.083  | 0.169  | 0.233  | 0.119  | 0.453  | 0.404  | 0.426  | 0.193  | 0.137  | 0.161  | 0.200  |   | 1 |
| JW3148 | b3181 | greA        | 12 | 0.243  | 0.179  | 0.336  | 0.240  | 0.364  | -0.052 | 0.166  | 0.357  | 0.426  | -0.001 | 0.082  | -0.037 | 0.069  | 0.075  | 0.092  | 0.463  | 0.443  | 0.466  | 0.209  | 0.127  | 0.180  | 0.177  |   | 1 |
| JW3149 | b3182 | dacB        | 3  | -0.278 | -0.134 | -0.024 | 0.126  | 0.164  | -0.059 | -0.128 | 0.170  | 0.256  | -0.021 | 0.056  | 0.205  | -0.130 | -0.013 | -0.013 | 0.111  | 0.146  | 0.204  | -0.045 | 0.023  | 0.106  | 0.128  |   | 1 |
| JW3150 | b3183 | yhbZ        | 15 | -0.044 | -0.025 | 0.077  | 0.132  | 0.056  | 0.046  | 0.018  | 0.167  | 0.054  | -0.072 | 0.004  | 0.249  | 0.047  | 0.142  | 0.119  | 0.132  | 0.131  | 0.201  | 0.009  | 0.087  | -0.045 | 0.008  |   | 1 |
| JW3151 | b3184 | yhbE        | 15 | 0.157  | 0.036  | 0.142  | 0.228  | 0.328  | 0.111  | 0.145  | 0.298  | 0.241  | -0.129 | 0.015  | 0.095  | 0.081  | 0.228  | 0.123  | 0.290  | 0.229  | 0.186  | 0.085  | 0.082  | 0.073  | 0.058  |   | 1 |
| JW3152 | b3185 | rpmA        | 12 | 0.179  | 0.099  | 0.281  | 0.250  | 0.273  | 0.103  | 0.188  | 0.372  | 0.318  | 0.006  | 0.055  | -0.038 | 0.077  | 0.187  | 0.099  | 0.390  | 0.360  | 0.394  | 0.145  | 0.067  | 0.125  | 0.137  |   | 1 |
| JW3153 | b3186 | rplU        | 12 | 0.237  | 0.147  | 0.205  | 0.176  | 0.288  | -0.068 | 0.147  | 0.268  | 0.318  | -0.090 | 0.064  | -0.025 | 0.006  | 0.105  | 0.154  | 0.445  | 0.397  | 0.340  | 0.028  | 0.141  | 0.243  | 0.162  |   | 1 |
| JW3154 | b3187 | ispB        | 2  | -0.216 | 0.018  | 0.075  | 0.064  | 0.040  | -0.057 | 0.059  | 0.048  | 0.093  | -0.218 | -0.184 | 0.143  | -0.013 | 0.069  | 0.065  | -0.068 | 0.030  | 0.157  | 0.112  | -0.149 | 0.054  | 0.115  |   | 1 |
| JW3155 | b3188 | nlp         | 6  | 0.036  | 0.016  | -0.067 | -0.010 | 0.062  | -0.091 | -0.063 | 0.077  | 0.134  | -0.204 | -0.178 | 0.123  | -0.078 | 0.072  | 0.001  | 0.210  | 0.226  | 0.340  | -0.068 | 0.056  | 0.038  | 0.041  |   | 1 |
| JW3156 | b3189 | murA        | 3  | 0.088  | -0.031 | 0.025  | 0.008  | 0.112  | 0.059  | 0.024  | 0.148  | 0.051  | -0.078 | -0.102 | 0.088  | 0.005  | 0.001  | -0.085 | 0.081  | 0.090  | 0.166  | 0.116  | 0.086  | 0.035  | -0.002 |   | 1 |
| JW3157 | b3190 | yrbA        | 14 | 0.185  | 0.039  | 0.001  | 0.080  | 0.248  | 0.009  | 0.107  | 0.246  | 0.290  | -0.119 | 0.037  | 0.101  | 0.047  | 0.158  | 0.026  | 0.307  | 0.286  | 0.365  | 0.101  | 0.190  | 0.335  | 0.140  |   | 1 |
| JW3158 | b3191 | yrbB        | 15 | 0.052  | -0.107 | -0.151 | -0.053 | 0.164  | 0.001  | 0.021  | 0.079  | 0.096  | -0.159 | -0.042 | -0.004 | -0.101 | -0.013 | 0.088  | 0.136  | 0.122  | -0.088 | -0.090 | -0.050 | 0.052  |        | 1 |   |
| JW3159 | b3192 | yrbC        | 15 | -0.021 | 0.186  | 0.135  | -0.069 | -0.049 | -0.022 | 0.144  | 0.006  | 0.059  | 0.047  | 0.038  | 0.001  | 0.140  | 0.168  | 0.043  | 0.161  | 0.059  | 0.027  | 0.073  | 0.106  | 0.024  | 0.178  |   | 1 |
| JW3160 | b3193 | yrbD        | 15 | 0.141  | 0.166  | 0.211  | 0.288  | 0.262  | 0.040  | 0.120  | 0.244  | 0.284  | 0.028  | 0.059  | 0.205  | 0.142  | 0.162  | 0.138  | 0.352  | 0.273  | 0.387  | 0.188  | 0.028  | 0.129  | 0.152  |   | 1 |
| JW3161 | b3194 | yrbE        | 15 | 0.178  | 0.110  | 0.118  | 0.168  | 0.183  | 0.116  | 0.202  | 0.236  | 0.229  | -0.035 | 0.052  | 0.126  | 0.122  | 0.258  | 0.186  | 0.302  | 0.227  | 0.286  | 0.109  | 0.004  | 0.134  | 0.211  |   | 1 |
| JW3162 | b3195 | yrbF        | 11 | 0.180  | 0.030  | 0.147  | 0.126  | 0.175  | 0.061  | 0.145  | 0.269  | 0.199  | -0.025 | 0.058  | 0.056  | 0.114  | 0.144  | 0.163  | 0.262  | 0.281  | 0.356  | 0.054  | 0.158  | 0.111  | 0.159  |   | 1 |
| JW3163 | b3196 | yrbG        | 15 | 0.102  | 0.130  | 0.186  | 0.147  | 0.229  | 0.040  | 0.178  | 0.168  | 0.325  | -0.056 | 0.047  | 0.031  | 0.021  | 0.087  | 0.057  | 0.342  | 0.335  | 0.244  | 0.091  | 0.060  | 0.146  | 0.042  |   | 1 |
| JW3164 | b3197 | yrbH        | 15 | -0.418 | -0.080 | 0.166  | 0.045  | -0.109 | -0.106 | -0.091 | 0.040  | 0.092  | -0.051 | 0.091  | 0.198  | -0.047 | -0.086 | 0.014  | 0.062  | 0.019  | 0.093  | 0.038  | 0.076  | -0.031 | -0.043 |   | 1 |
| JW3165 | b3198 | yrbI        | 1  |        |        |        |        |        |        |        |        |        |        |        |        |        |        |        |        |        |        |        |        |        |        |   |   |

|        |       |             |    |         |         |         |         |         |         |         |         |         |         |         |         |         |         |         |         |         |         |         |         |         |         |         |   |   |
|--------|-------|-------------|----|---------|---------|---------|---------|---------|---------|---------|---------|---------|---------|---------|---------|---------|---------|---------|---------|---------|---------|---------|---------|---------|---------|---------|---|---|
| JW3209 | b3240 | yhCP        | 15 | 0.028   | 0.037   | 0.092   | 0.109   | 0.144   | 0.009   | 0.012   | 0.167   | 0.227   | -0.070  | -0.015  | 0.162   | 0.048   | 0.096   | 0.080   | 0.141   | 0.218   | 0.196   | 0.172   | 0.069   | 0.090   | 0.113   |         |   |   |
| JW3210 | b3241 | yhCQ        | 15 | 0.090   | 0.040   | 0.045   | 0.059   | 0.126   | 0.071   | 0.052   | 0.112   | 0.104   | -0.193  | -0.121  | 0.047   | -0.019  | 0.049   | 0.039   | 0.081   | 0.121   | 0.160   | 0.149   | 0.053   | 0.054   | 0.177   |         | 1 |   |
| JW3211 | b3242 | yhCR        | 15 | Invalid |   | 1 |
| JW3212 | b3243 | yhCS        | 9  | 0.007   | -0.081  | 0.013   | -0.040  | -0.032  | 0.052   | 0.071   | 0.096   | 0.015   | -0.209  | -0.145  | 0.000   | 0.057   | 0.109   | 0.040   | -0.035  | 0.151   | 0.096   | -0.028  | Invalid | Invalid | -0.016  | -0.103  |   | 1 |
| JW3213 | b3244 | tidD        | 12 | -0.078  | -0.083  | 0.020   | 0.175   | 0.196   | 0.046   | -0.063  | 0.227   | 0.227   | 0.006   | 0.040   | 0.193   | -0.062  | -0.020  | -0.063  | 0.139   | 0.256   | 0.283   | -0.064  | 0.094   | 0.088   | 0.039   |         | 1 |   |
| JW3214 | b3245 | yhDP        | 15 | 0.103   | 0.074   | 0.139   | 0.228   | 0.207   | 0.022   | 0.237   | 0.205   | -0.022  | 0.016   | 0.168   | 0.098   | 0.034   | 0.036   | 0.340   | 0.255   | 0.239   | 0.107   | 0.063   | 0.051   | 0.059   |         |         | 1 |   |
| JW3215 | b3246 | yhDR        | 15 | 0.146   | 0.042   | 0.185   | 0.217   | 0.176   | 0.126   | 0.071   | 0.207   | 0.136   | -0.069  | 0.056   | 0.111   | 0.095   | 0.150   | 0.098   | 0.236   | 0.165   | 0.179   | 0.151   | 0.067   | 0.132   | 0.057   |         | 1 |   |
| JW3216 | b3247 | rng         | 14 | 0.070   | -0.005  | 0.069   | 0.079   | 0.093   | 0.097   | 0.057   | 0.181   | 0.110   | 0.011   | 0.073   | 0.050   | 0.117   | 0.213   | 0.115   | 0.233   | 0.258   | 0.205   | -0.066  | Invalid | Invalid | 0.046   |         | 1 |   |
| JW3217 | b3248 | yhDE        | 15 | 0.098   | 0.014   | 0.041   | 0.051   | 0.076   | 0.008   | 0.045   | 0.036   | 0.189   | -0.044  | 0.048   | -0.192  | -0.080  | -0.033  | 0.009   | 0.208   | 0.110   | 0.169   | 0.017   | -0.110  | 0.072   | -0.067  |         | 1 |   |
| JW3218 | b3249 | mreD        | 3  | -0.201  | 0.026   | 0.009   | -0.006  | 0.066   | -0.039  | 0.074   | 0.075   | 0.183   | -0.030  | -0.004  | 0.176   | 0.081   | 0.063   | 0.179   | 0.067   | 0.200   | 0.114   | -0.045  | -0.054  | 0.098   | 0.175   |         | 1 |   |
| JW3219 | b3250 | mreC        | 3  | -0.111  | -0.101  | 0.001   | -0.061  | 0.102   | 0.061   | -0.080  | 0.153   | 0.140   | -0.132  | -0.056  | 0.151   | -0.016  | -0.014  | -0.027  | 0.052   | 0.139   | 0.156   | -0.016  | Invalid | Invalid | -0.007  |         | 1 |   |
| JW3220 | b3251 | mreB        | 3  | Invalid |   | 1 |
| JW3221 | b3252 | yhDA        | 15 | 0.151   | 0.134   | 0.186   | 0.167   | 0.162   | 0.127   | 0.096   | 0.231   | 0.125   | 0.053   | 0.028   | 0.250   | 0.123   | 0.118   | 0.096   | 0.121   | 0.149   | 0.239   | 0.267   | 0.132   | 0.095   | 0.181   |         | 1 |   |
| JW3222 | b3253 | yhDH        | 15 | 0.168   | 0.073   | 0.088   | 0.189   | 0.207   | 0.213   | 0.092   | 0.246   | 0.169   | 0.012   | 0.039   | 0.107   | 0.141   | 0.180   | 0.083   | 0.191   | 0.173   | 0.280   | 0.142   | -0.045  | 0.136   | 0.180   |         | 1 |   |
| JW3223 | b3255 | accB        | 7  | 0.294   | 0.216   | 0.162   | 0.258   | 0.479   | 0.087   | 0.158   | 0.356   | 0.391   | -0.018  | 0.031   | 0.078   | 0.153   | 0.116   | 0.091   | 0.438   | 0.454   | 0.466   | 0.197   | 0.107   | 0.204   | 0.145   |         | 1 |   |
| JW3224 | b3256 | accC        | 7  | 0.116   | 0.156   | 0.062   | 0.088   | 0.260   | 0.060   | 0.184   | 0.278   | 0.260   | 0.067   | 0.003   | 0.069   | 0.127   | 0.140   | 0.103   | 0.278   | 0.375   | 0.338   | 0.099   | 0.061   | 0.197   | 0.263   |         | 1 |   |
| JW3225 | b3257 | yhDT        | 15 | -0.353  | -0.051  | -0.085  | 0.056   | 0.035   | 0.118   | -0.076  | 0.113   | 0.082   | 0.014   | 0.065   | -0.072  | -0.229  | -0.279  | -0.096  | -0.069  | 0.032   | -0.016  | -0.138  | -0.160  | -0.339  | -0.042  |         | 1 |   |
| JW3226 | b3258 | panF        | 11 | -0.194  | -0.063  | -0.015  | 0.069   | -0.023  | 0.045   | -0.085  | 0.036   | 0.048   | -0.112  | -0.055  | 0.150   | -0.023  | 0.034   | 0.005   | 0.091   | 0.087   | 0.145   | -0.067  | 0.060   | -0.145  | -0.013  |         | 1 |   |
| JW3227 | b3259 | prmA        | 12 | -0.007  | 0.082   | 0.200   | 0.224   | 0.114   | 0.173   | 0.101   | 0.140   | 0.047   | 0.033   | 0.106   | 0.243   | 0.009   | 0.049   | 0.014   | 0.108   | 0.062   | 0.175   | 0.132   | 0.089   | 0.053   | 0.081   |         | 1 |   |
| JW3228 | b3260 | yhDG        | 15 | 0.147   | 0.170   | 0.258   | 0.287   | 0.301   | 0.120   | 0.206   | 0.405   | 0.275   | 0.055   | 0.088   | 0.183   | 0.186   | 0.213   | 0.204   | 0.547   | 0.386   | 0.547   | 0.251   | 0.126   | 0.218   | 0.183   |         | 1 |   |
| JW3229 | b3261 | fis         | 10 | 0.002   | 0.158   | 0.146   | 0.256   | 0.203   | 0.040   | 0.159   | 0.377   | 0.354   | 0.187   | 0.121   | 0.367   | 0.176   | 0.261   | 0.288   | 0.488   | 0.378   | 0.594   | 0.104   | 0.275   | 0.339   | 0.370   |         | 1 |   |
| JW3230 | b3262 | yhDJ        | 15 | -0.276  | -0.009  | -0.015  | 0.162   | 0.067   | 0.009   | 0.000   | 0.114   | 0.283   | 0.104   | 0.157   | 0.113   | -0.026  | 0.020   | 0.153   | 0.174   | 0.054   | 0.156   | 0.022   | 0.023   | 0.145   | 0.121   |         | 1 |   |
| JW3232 | b3264 | envR        | 13 | 0.157   | 0.121   | 0.150   | 0.201   | 0.242   | 0.079   | 0.297   | 0.133   | 0.277   | 0.070   | 0.099   | -4.017  | 0.051   | 0.119   | 0.082   | 0.401   | 0.087   | 0.300   | 0.193   | -3.789  | 0.226   | 0.128   |         | 1 |   |
| JW3233 | b3265 | acrE        | 3  | -0.102  | -0.015  | -0.046  | 0.083   | 0.114   | 0.085   | 0.039   | 0.041   | 0.159   | 0.091   | 0.124   | -5.503  | -0.008  | 0.153   | 0.093   | 0.323   | 0.241   | 0.288   | -0.115  | -6.201  | 0.113   | 0.099   |         | 1 |   |
| JW3234 | b3266 | envD / acrF | 14 | -0.111  | 0.075   | 0.098   | 0.196   | 0.138   | 0.050   | 0.031   | 0.250   | 0.181   | 0.023   | 0.080   | -4.997  | 0.065   | 0.117   | 0.148   | 0.352   | 0.099   | 0.252   | 0.184   | -5.419  | 0.217   | 0.144   |         | 1 |   |
| JW3235 | b3267 | yhDV        | 15 | -0.141  | 0.040   | 0.054   | 0.231   | 0.217   | 0.184   | -0.021  | 0.272   | 0.134   | -0.086  | -0.059  | -2.948  | -0.077  | 0.152   | 0.040   | 0.218   | 0.144   | 0.182   | -0.038  | -3.369  | -0.078  | -2.594  |         | 1 |   |
| JW3236 | b3268 | yhDW        | 15 | -0.166  | -0.141  | -0.159  | 0.105   | 0.062   | 0.195   | 0.011   | 0.111   | 0.017   | 0.005   | 0.003   | -4.639  | -0.079  | 0.060   | -0.059  | 0.164   | 0.049   | 0.147   | -0.181  | -0.191  | 0.026   | 0.030   |         | 1 |   |
| JW3237 | b3269 | yhDX        | 15 | -0.062  | -0.003  | 0.036   | 0.151   | -0.063  | 0.244   | 0.136   | -0.035  | -0.021  | 0.100   | 0.111   | -4.219  | -0.018  | 0.157   | 0.091   | 0.061   | -0.214  | 0.064   | -0.045  | -0.147  | 0.090   | 0.138   |         | 1 |   |
| JW3238 | b3270 | yhDY        | 15 | -0.103  | -0.139  | -0.165  | 0.185   | 0.208   | 0.213   | -0.053  | 0.179   | 0.155   | 0.039   | 0.084   | -0.079  | -0.133  | -0.041  | -0.058  | 0.226   | 0.061   | 0.117   | -0.232  | -0.101  | -0.023  | -0.035  |         | 1 |   |
| JW3239 | b3271 | yhDZ        | 11 | -0.501  | -0.250  | -0.340  | -0.072  | 0.063   | 0.088   | -0.214  | 0.128   | 0.069   | 0.042   | 0.082   | 0.192   | -0.200  | -0.117  | -0.005  | 0.071   | 0.047   | 0.071   | -0.280  | -0.228  | -0.105  | -0.079  |         | 1 |   |
| JW3240 | b3279 | yrdA        | 15 | -0.005  | 0.101   | -0.035  | 0.323   | 0.310   | 0.173   | 0.139   | 0.325   | 0.244   | -0.003  | 0.056   | 0.329   | 0.017   | 0.220   | 0.205   | 0.211   | 0.115   | 0.219   | 0.105   | 0.129   | 0.349   | 0.068   |         | 1 |   |
| JW3241 | b3280 | yrdB        | 15 | -0.125  | -0.179  | -0.297  | 0.134   | 0.366   | 0.120   | -0.140  | 0.331   | 0.215   | -0.161  | 0.029   | 0.244   | -0.213  | -0.180  | -0.226  | 0.185   | 0.151   | -0.066  | -0.248  | 0.128   | 0.252   | 0.065   |         | 1 |   |
| JW3242 | b3281 | aroE        | 1  | -0.123  | -0.026  | -0.161  | 0.166   | 0.179   | 0.261   | 0.028   | 0.275   | 0.001   | 0.033   | 0.062   | 0.181   | -0.036  | 0.098   | 0.035   | 0.193   | 0.054   | 0.079   | -0.077  | 0.090   | 0.143   | 0.046   |         | 1 |   |
| JW3243 | b3282 | yrdC        | 15 | 0.139   | 0.042   | -0.004  | 0.123   | 0.284   | 0.267   | 0.067   | 0.375   | 0.046   | -0.067  | 0.024   | 0.023   | -0.083  | -0.062  | -0.053  | 0.230   | 0.224   | 0.331   | 0.031   | 0.008   | 0.024   | 0.090   |         | 1 |   |
| JW3244 | b3283 | yrdD        | 15 | -0.409  | 0.068   | 0.009   | 0.106   | 0.049   | -0.026  | -0.088  | 0.155   | 0.054   | 0.046   | -0.014  | 0.138   | -0.175  | -0.087  | 0.010   | 0.100   | 0.041   | 0.112   | 0.021   | 0.075   | 0.221   | 0.160   |         | 1 |   |
| JW3245 | b3284 | smg         | 15 | -0.189  | -0.273  | -0.210  | 0.150   | 0.171   | 0.327   | -0.037  | 0.137   | 0.027   | -0.024  | 0.128   | 0.056   | -0.163  | -0.152  | -0.178  | 0.097   | -0.112  | 0.035   | -0.159  | 0.050   | 0.098   | 0.050   |         | 1 |   |
| JW3246 | b3285 | smf         | 14 | 0.200   | 0.110   | 0.299   | 0.451   | 0.440   | 0.257   | 0.220   | 0.394   | 0.272   | 0.202   | 0.080   | 0.211   | 0.182   | 0.183   | 0.157   | 0.425   | 0.114   | 0.474   | 0.284   | 0.124   | 0.236   | 0.300   |         | 1 |   |
| JW3247 | b3286 | smf         | 15 | 0.159   | -0.170  | -0.185  | 0.350   | 0.412   | 0.118   | 0.013   | 0.431   | 0.163   | -0.086  | 0.066   | -0.213  | -0.026  | -0.021  | -0.055  | 0.264   | 0.101   | 0.117   | -0.082  | -0.151  | 0.162   | -0.085  |         | 1 |   |
| JW3248 | b3287 | def / fms   | 15 | 0.100   | 0.082   | 0.106   | 0.506   | 0.586   | 0.304   | 0.972   | 0.542   | 0.422   | 0.018   | 0.147   | 0.076   | 0.004   | 0.052   | 0.077   | 0.469   | 0.307   | 0.370   | 0.116   | 0.196   | 0.186   | 0.140   |         | 1 |   |
| JW3249 | b3288 | fmt         | 12 | -0.252  | -0.180  | 0.274   | 0.629   | 0.480   | 0.202   | 0.248   | 0.378   | 0.394   | 0.135   | 0.324   | 0.414   | 0.062   | 0.111   | 0.123   | 0.269   | 0.176   | 0.042   | 0.196   | 0.130   | 0.138   | -0.007  |         | 1 |   |
| JW3250 | b3289 | sun         | 14 | -0.196  | -0.084  | 0.145   | 0.423   | 0.211   | 0.037   | -0.100  | 0.245   | 0.110   | 0.146   | 0.187   | 0.382   | 0.009   | 0.091   | 0.000   | -0.139  | 0.013   | -0.079  | -0.029  | 0.027   | -0.005  | 0.010   |         | 1 |   |
| JW3251 | b3290 | trkA        | 11 | 0.013   | 0.007   | 0.120   | 0.633   | 0.526   | 0.390   | 0.010   | 0.620   | 0.222   | 0.080   | 0.160   | 0.328   | 0.149   | 0.216   | 0.130   | 0.480   | 0.275   | 0.515   | 0.007   | 0.036   | 0.207   | 0.103   |         | 1 |   |
| JW3252 | b3291 | mscL        | 11 | -0.235  | 0.158   | -0.048  | 0.313   | 0.263   | 0.374   | 0.012   | 0.304   | 0.108   | 0.081   | 0.167   | 0.254   | 0.128   | 0.312   | 0.230   | 0.218   | -0.019  | 0.099   | -0.142  | -4.113  | 0.000   | -0.043  |         | 1 |   |
| JW3253 | b3292 | yhDL        | 15 | 0.223   | 0.118   | -0.039  | 0.231   | 0.292   | 0.124   | 0.018   | 0.312   | 0.180   | -0.112  | 0.088   | 0.055   | 0.080   | 0.164   | 0.144   | 0.276   | 0.079   | 0.155   | -0.022  | -3.765  | -0.139  | 0.047   |         | 1 |   |
| JW3254 | b3292 | zntR        | 9  | 0.003   | 0.043   | 0.137   | 0.308   | 0.200   | 0.255   | 0.178   | 0.331   | 0.175   | 0.040   | 0.153   | 0.139   | 0.052   | 0.144   | 0.066   | 0.339   | 0.100   | 0.261   | 0.040   | -5.039  | 0.232   | 0.070   |         | 1 |   |
| JW3255 | b3293 | yhDN        | 15 | -0.050  | 0.030   | -0.027  | 0.293   | 0.293   | 0.215   | 0.006   | 0.456   | 0.226   | -0.002  | 0.104   | 0.334   | 0.091   | 0.253   | 0.219   | 0.360   | 0.288   | 0.383   | -0.089  | -4.210  | 0.114   | 0.234   |         | 1 |   |
| JW3256 | b3294 | rplQ        | 12 | 0.079   | 0.180   | 0.340   | 0.557   | 0.600   | 0.277   | 0.140   | 0.606   | 0.363   | 0.104   | 0.076   | 0.293   | 0.237   | 0.286   | 0.182   | 0.538   | 0.450   |         |         |         |         |         |         |   |   |

|        |       |             |    |        |        |        |        |        |        |        |        |        |        |        |        |        |        |        |        |        |        |        |        |        |        |   |
|--------|-------|-------------|----|--------|--------|--------|--------|--------|--------|--------|--------|--------|--------|--------|--------|--------|--------|--------|--------|--------|--------|--------|--------|--------|--------|---|
| JW3298 | b3336 | bfr         | 11 | -2.727 | -3.077 | -3.520 | -3.137 | -2.877 | 0.413  | -2.631 | 0.219  | -2.774 | -0.041 | 0.088  | 0.107  | -2.892 | -2.889 | -3.038 | 0.218  | 0.120  | 0.168  | -3.262 | -3.317 | 0.146  | -5.209 | 1 |
| JW3300 | b3338 | chia / yheB | 14 | -6.498 | -6.447 | -6.903 | -7.066 | -7.301 | 0.316  | -6.063 | 0.055  | -6.305 | -0.053 | 0.087  | -0.094 | -6.709 | -6.275 | -6.360 | 0.009  | -0.055 | 0.009  | -6.126 | -6.356 | -0.281 | -1.057 | 1 |
| JW3301 | b3339 | tufA        | 12 | 0.251  | 0.134  | 0.232  | 0.465  | 0.583  | 0.356  | 0.196  | 0.558  | 0.319  | 0.032  | 0.055  | 0.303  | 0.123  | 0.327  | 0.093  | 0.649  | 0.293  | 0.351  | 0.245  | 0.158  | 0.133  | 0.177  | 1 |
| JW3302 | b3340 | fusA        | 12 | 0.176  | 0.157  | 0.252  | 0.503  | 0.635  | 0.357  | 0.279  | 0.362  | 0.242  | 0.010  | 0.065  | 0.203  | 0.149  | 0.197  | 0.081  | 0.380  | 0.338  | 0.388  | 0.314  | 0.125  | 0.187  | 0.174  | 1 |
| JW3303 | b3341 | rpsL        | 12 | -0.220 | -0.267 | -0.214 | -0.019 | 0.421  | 0.307  | -0.105 | 0.297  | 0.012  | -0.075 | 0.001  | 0.083  | -0.238 | -0.292 | -0.319 | 0.336  | 0.335  | 0.371  | -0.304 | -0.135 | 0.185  | -0.032 | 1 |
| JW3304 | b3342 | rnsG        | 12 | 0.517  | 0.116  | 0.280  | 0.415  | 1.007  | 0.300  | 0.183  | 0.289  | 0.376  | -0.102 | 0.064  | -0.034 | 0.120  | 0.083  | 0.061  | 0.402  | 0.379  | 0.021  | 0.244  | 0.094  | 0.191  | 0.191  | 1 |
| JW3305 | b3343 | yheL        | 15 | -0.268 | -0.074 | 0.006  | 0.213  | 0.312  | 0.152  | -0.131 | -0.036 | 0.177  | -0.100 | 0.028  | 0.115  | -0.218 | -0.115 | -0.120 | -0.157 | -0.121 | -0.153 | -0.111 | -0.081 | -0.008 | -0.038 | 1 |
| JW3306 | b3344 | yheM        | 15 | -0.168 | 0.131  | 0.151  | 0.293  | 0.112  | 0.184  | 0.154  | 0.322  | 0.110  | 0.077  | 0.093  | 0.240  | 0.096  | 0.219  | 0.174  | 0.243  | -0.351 | 0.199  | 0.109  | 0.107  | 0.194  | 0.168  | 1 |
| JW3307 | b3345 | yheN        | 15 | -0.099 | -0.390 | -0.478 | -0.178 | -0.195 | 0.207  | -0.264 | 0.016  | -0.253 | -0.076 | 0.042  | -0.069 | -0.389 | -0.202 | -0.307 | -0.162 | -0.596 | -0.141 | -0.414 | -0.580 | -0.537 | -0.361 | 1 |
| JW3308 | b3346 | yheO        | 15 | -0.002 | 0.090  | 0.109  | 0.311  | 0.277  | 0.228  | 0.126  | 0.388  | 0.264  | 0.074  | 0.070  | 0.061  | 0.036  | 0.117  | 0.062  | 0.374  | -0.004 | 0.320  | 0.022  | 0.084  | 0.191  | 0.126  | 1 |
| JW3309 | b3347 | fkpA        | 4  | 0.188  | 0.236  | 0.196  | 0.381  | 0.435  | 0.092  | 0.220  | 0.413  | 0.416  | -0.091 | 0.103  | 0.022  | 0.112  | 0.209  | 0.188  | 0.360  | 0.021  | 0.321  | 0.144  | 0.071  | 0.196  | 0.179  | 1 |
| JW3310 | b3348 | slyX        | 15 | 0.208  | 0.173  | 0.365  | 0.198  | 0.238  | 0.144  | 0.148  | 0.381  | 0.104  | -0.007 | 0.025  | 0.244  | 0.132  | 0.474  | 0.318  | 0.344  | 0.368  | 0.276  | 0.338  | 0.091  | 0.206  | 0.173  | 1 |
| JW3311 | b3349 | slyD        | 12 | -0.181 | -0.049 | 0.059  | 0.161  | 0.051  | 0.112  | -0.021 | 0.156  | -0.021 | 0.011  | 0.043  | 0.158  | -0.032 | 0.090  | 0.059  | 0.027  | 0.040  | 0.091  | 0.023  | -0.076 | 0.063  | -0.014 | 1 |
| JW3312 | b3350 | g25#3       | 15 | 0.010  | 0.016  | 0.167  | 0.414  | 0.393  | 0.098  | 0.096  | 0.276  | 0.375  | 0.049  | 0.037  | 0.250  | 0.056  | 0.145  | 0.056  | 0.368  | -0.344 | 0.424  | 0.070  | 0.086  | 0.159  | 0.059  | 1 |
| JW3313 | b3350 | kefB        | 11 | -0.010 | -0.145 | -0.148 | 0.067  | -0.046 | 0.284  | -0.022 | 0.130  | -0.149 | -0.029 | 0.041  | -0.051 | -0.050 | 0.008  | -0.068 | 0.072  | -0.319 | -0.062 | -0.129 | -0.061 | 0.016  | 0.034  | 1 |
| JW3314 | b3351 | yheR        | 7  | -0.062 | -0.064 | -0.083 | 0.032  | -0.058 | 0.032  | -0.078 | -0.180 | -0.184 | -0.046 | -0.190 | -0.195 | -0.184 | -0.162 | -0.193 | -0.067 | -0.154 | -0.205 | -0.083 | -0.051 | -0.126 | -0.167 | 1 |
| JW3315 | b3352 | yheS        | 11 | -0.029 | 0.074  | 0.086  | 0.186  | 0.126  | 0.194  | 0.067  | 0.195  | 0.163  | -0.031 | 0.022  | -0.130 | 0.041  | 0.083  | -0.002 | -0.161 | 0.106  | 0.088  | 0.031  | -0.140 | -0.100 | -0.059 | 1 |
| JW3316 | b3353 | yheT        | 15 | 0.384  | 0.152  | 0.169  | 0.011  | -0.101 | 0.122  | 0.019  | -0.042 | -0.162 | -0.084 | 0.075  | -0.052 | 0.107  | 0.080  | 0.151  | 0.007  | -0.023 | -0.013 | 0.080  | -0.150 | 0.277  | -0.022 | 1 |
| JW3317 | b3354 | yheU        | 15 | -0.041 | 0.012  | -0.002 | 0.008  | 0.096  | -0.026 | -0.001 | 0.175  | 0.158  | -0.245 | -0.087 | 0.201  | -0.060 | 0.031  | 0.034  | -0.013 | 0.137  | 0.174  | 0.010  | 0.001  | 0.015  | 0.039  | 1 |
| JW3318 | b3355 | prkB        | 15 | -0.072 | 0.076  | 0.089  | 0.138  | 0.053  | 0.051  | 0.116  | 0.145  | 0.049  | -0.015 | -0.038 | 0.165  | -0.047 | 0.140  | 0.028  | 0.062  | 0.132  | 0.178  | 0.138  | -0.085 | 0.049  | 0.153  | 1 |
| JW3319 | b3356 | yhfA        | 15 | 0.079  | 0.049  | -0.033 | 0.087  | 0.189  | 0.180  | 0.120  | 0.060  | 0.126  | -0.114 | 0.013  | 0.064  | 0.023  | 0.149  | 0.030  | 0.249  | 0.165  | 0.133  | -0.015 | 0.047  | -0.002 | 0.073  | 1 |
| JW3320 | b3357 | crp         | 9  | -0.030 | 0.227  | 0.272  | 0.197  | 0.283  | 0.095  | 0.326  | 0.322  | 0.328  | -0.006 | -0.025 | 0.113  | 0.257  | 0.230  | 0.147  | 0.331  | 0.384  | 0.364  | 0.308  | 0.223  | 0.126  | 0.127  | 1 |
| JW3321 | b3358 | ynfK        | 15 | -0.089 | 0.204  | 0.151  | 0.045  | -0.008 | 0.091  | 0.084  | 0.076  | 0.074  | -0.013 | 0.053  | -0.052 | -1.699 | 0.130  | 0.060  | 0.093  | 0.071  | -0.035 | 0.178  | -0.017 | -0.098 | 0.204  | 1 |
| JW3322 | b3359 | argD        | 1  | -0.030 | -0.096 | -0.171 | -0.135 | -0.083 | 0.120  | -0.092 | -0.097 | -0.067 | -0.045 | 0.001  | 0.188  | -0.054 | 0.108  | -0.018 | -0.126 | -0.009 | 0.023  | -0.200 | -0.021 | 0.012  | 0.103  | 1 |
| JW3323 | b3360 | pabA        | 2  | -0.189 | 0.017  | 0.177  | 0.101  | -0.032 | -0.083 | -0.021 | -0.065 | 0.127  | -0.053 | 0.004  | 0.200  | 0.018  | 0.098  | 0.077  | 0.114  | 0.161  | 0.193  | 0.119  | 0.116  | 0.171  | -0.018 | 1 |
| JW3324 | b3361 | fic         | 4  | 0.053  | 0.003  | 0.083  | -0.011 | -0.294 | -0.001 | 0.025  | 0.065  | -0.211 | -0.045 | 0.035  | 0.110  | 0.021  | 0.103  | 0.021  | 0.167  | 0.214  | -0.238 | 0.009  | -0.005 | 0.183  | 0.033  | 1 |
| JW3326 | b3363 | ppiA        | 12 | 0.053  | 0.086  | 0.189  | 0.169  | 0.051  | 0.055  | 0.145  | 0.189  | 0.144  | 0.069  | 0.090  | 0.182  | 0.035  | 0.127  | 0.091  | 0.306  | 0.200  | 0.265  | 0.103  | 0.075  | 0.151  | 0.071  | 1 |
| JW3327 | b3364 | yhfC        | 15 | -0.005 | 0.039  | 0.078  | 0.077  | -0.031 | 0.013  | 0.197  | 0.091  | 0.122  | 0.069  | 0.056  | 0.012  | 0.068  | 0.156  | 0.105  | 0.236  | 0.113  | 0.168  | -0.030 | 0.045  | 0.036  | 0.069  | 1 |
| JW3328 | b3365 | nirB        | 6  | 0.265  | 0.115  | 0.119  | 0.054  | -0.054 | -0.061 | 0.152  | 0.087  | 0.132  | 0.009  | 0.128  | -0.100 | 0.062  | 0.016  | 0.021  | 0.123  | 0.141  | 0.173  | 0.133  | 0.107  | 0.132  | 0.113  | 1 |
| JW3329 | b3366 | nirD        | 6  | 0.005  | -0.153 | 0.002  | -0.070 | -0.039 | -0.063 | -0.064 | -0.104 | 0.073  | -0.123 | -0.074 | 0.088  | -0.223 | -0.230 | -0.172 | 0.004  | 0.101  | -0.042 | 0.049  | -0.131 | -0.119 | -0.013 | 1 |
| JW3330 | b3367 | nirC        | 6  | 0.039  | 0.018  | 0.100  | -0.010 | -0.191 | -0.151 | 0.092  | -0.282 | -0.104 | 0.007  | -0.019 | 0.229  | -0.207 | 0.125  | 0.027  | -0.165 | -0.069 | -0.174 | 0.078  | 0.129  | -0.024 | 0.129  | 1 |
| JW3331 | b3368 | chsG        | 2  | -0.295 | -0.290 | 0.015  | -0.105 | -0.260 | 0.094  | 0.038  | -0.104 | -0.147 | 0.054  | 0.054  | -0.145 | -0.149 | -0.024 | -0.155 | -0.107 | -0.098 | -0.163 | -0.029 | -0.147 | -0.170 | -0.149 | 1 |
| JW3333 | b3370 | ynfM        | 15 | -0.087 | 0.068  | 0.171  | -1.077 | -6.220 | -0.015 | 0.215  | -6.135 | -5.552 | -0.041 | 0.038  | -0.020 | 0.072  | 0.160  | 0.073  | -6.037 | -5.887 | -6.266 | 0.091  | 0.068  | -5.892 | 0.176  | 1 |
| JW3334 | b3371 | yhfN        | 15 | -0.147 | 0.022  | 0.131  | -1.104 | -5.860 | -2.804 | 0.089  | -5.690 | -5.471 | 0.000  | -0.002 | -0.071 | -0.036 | 0.003  | -0.033 | -5.559 | -5.448 | -5.797 | 0.080  | 0.018  | -5.739 | 0.072  | 1 |
| JW3335 | b3372 | yhfO        | 15 | 0.098  | 0.122  | 0.227  | -1.018 | -4.814 | -4.814 | 0.130  | -4.611 | -4.406 | -0.100 | -0.008 | -0.121 | 0.013  | 0.004  | 0.060  | -4.707 | -4.723 | -4.923 | 0.089  | -0.041 | -5.476 | 0.101  | 1 |
| JW3336 | b3373 | yhfP        | 15 | -0.246 | 0.073  | -0.195 | -1.163 | -4.555 | -4.305 | -0.222 | -4.415 | -4.074 | 0.056  | 0.034  | 0.241  | 0.116  | 0.207  | 0.085  | -4.207 | -4.568 | -4.626 | -0.268 | 0.006  | -4.793 | 0.003  | 1 |
| JW3337 | b3374 | yhfQ        | 15 | -0.032 | -0.008 | 0.252  | -0.966 | -5.387 | -1.848 | 0.059  | -4.945 | -4.874 | 0.000  | 0.023  | 0.170  | 0.013  | 0.111  | -0.027 | -5.038 | -4.997 | -5.107 | 0.138  | 0.017  | -5.292 | -0.035 | 1 |
| JW3338 | b3375 | yhfR        | 9  | -0.106 | -0.215 | 0.254  | -0.869 | -5.527 | -0.192 | 0.176  | -5.230 | -4.943 | 0.019  | 0.077  | 0.127  | -0.125 | -0.015 | -0.150 | -5.278 | -5.219 | -5.638 | 0.189  | 0.055  | -5.340 | -0.094 | 1 |
| JW3339 | b3376 | yhfS        | 15 | -5.786 | 0.087  | 0.120  | -0.390 | -0.997 | -0.001 | 0.108  | -1.161 | -0.850 | 0.002  | 0.011  | 0.025  | -0.059 | 0.072  | -0.039 | -0.922 | -0.717 | -1.296 | 0.032  | -0.876 | -0.714 | -0.474 | 1 |
| JW3340 | b3377 | yhfT        | 15 | -6.386 | -0.189 | -0.143 | -0.226 | -0.384 | -0.157 | -0.031 | -0.280 | -0.110 | -0.001 | 0.070  | 0.025  | -0.084 | -0.020 | -0.064 | -0.076 | -0.152 | -0.107 | -0.256 | -0.136 | -0.113 | -0.114 | 1 |
| JW3341 | b3378 | yhfU        | 15 | -4.922 | -0.210 | -0.219 | -0.210 | -0.212 | -0.095 | -0.138 | -0.093 | -0.028 | 0.025  | -0.019 | 0.258  | -0.201 | -0.126 | -0.154 | -0.099 | -0.013 | -0.118 | -0.212 | -0.056 | 0.014  | -0.140 | 1 |
| JW3342 | b3379 | php         | 6  | -5.839 | -0.101 | -0.153 | -0.173 | -0.204 | -0.066 | -0.098 | -0.131 | -0.138 | -0.053 | -0.018 | 0.225  | -0.197 | -0.072 | -0.118 | -0.101 | -0.024 | -0.090 | -0.166 | -0.138 | -0.060 | -0.087 | 1 |
| JW3344 | b3381 | yhfX        | 15 | -6.339 | -0.441 | -0.347 | -0.488 | -0.769 | -0.089 | -0.372 | -0.666 | -0.498 | 0.097  | 0.028  | 0.315  | -0.343 | -0.220 | -0.288 | -0.559 | -0.484 | -0.592 | -0.364 | -0.488 | -0.405 | -0.214 | 1 |
| JW3346 | b3383 | yhfZ        | 15 | -5.023 | -0.208 | -0.264 | -0.143 | -0.118 | 0.035  | -0.204 | -0.098 | -0.019 | -0.320 | -0.248 | 0.114  | -0.169 | -0.038 | -0.157 | 0.010  | -0.122 | -0.054 | -0.321 | -0.685 | -0.249 | -0.333 | 1 |
| JW3347 | b3384 | trpS        | 12 | -0.024 | 0.097  | 0.115  | 0.027  | -0.045 | -0.058 | 0.171  | 0.048  | 0.150  | 0.034  | 0.037  | 0.115  | 0.120  | 0.231  | 0.092  | 0.277  | 0.243  | 0.205  | 0.073  | 0.084  | 0.172  | 0.121  | 1 |
| JW3348 | b3385 | gph         | 15 | 0.088  | 0.069  | 0.117  | 0.029  | -0.105 | -0.064 | 0.015  | 0.009  | 0.174  | -0.351 | -0.198 | -0.076 | -0.144 | -0.114 | -0.096 | 0.208  | 0.040  | 0.058  | -0.011 | -0.148 | -0.100 | -0.030 | 1 |
| JW3349 | b3386 | rpe         | 6  | -0.190 | -0.153 | -0.090 | 0.004  | 0.105  | -0.075 | -0.078 | 0.081  | 0.195  | -0.092 | -0.060 | 0.223  | -0.025 | 0.045  | 0.026  | -0.026 | 0.068  | 0.     |        |        |        |        |   |





|        |       |       |    |        |        |        |        |        |       |        |        |        |        |        |        |        |        |        |        |        |        |        |        |        |        |
|--------|-------|-------|----|--------|--------|--------|--------|--------|-------|--------|--------|--------|--------|--------|--------|--------|--------|--------|--------|--------|--------|--------|--------|--------|--------|
| JW3486 | b3518 | yjhA  | 15 | -0.159 | 0.015  | -0.031 | 0.009  | -0.016 | 0.859 | -0.009 | 0.325  | 0.105  | -0.050 | 0.039  | 0.249  | -0.058 | 0.166  | 0.126  | 0.023  | 0.066  | 0.196  | -0.116 | 0.039  | 0.041  | 0.037  |
| JW3487 | b3519 | treF  | 6  | -0.033 | 0.061  | -0.049 | -0.106 | -0.139 | 0.952 | 0.359  | 0.239  | -0.088 | -0.003 | 0.039  | 0.034  | -0.076 | 0.066  | -0.079 | -0.035 | -0.006 | -0.038 | -0.052 | 0.003  | 0.062  | 0.102  |
| JW3488 | b3520 | yjhB  | 15 | -0.086 | 0.046  | 0.115  | 0.097  | -0.075 | 0.764 | 0.713  | 0.397  | 0.158  | -0.014 | 0.037  | 0.180  | 0.109  | -0.359 | 0.195  | 0.097  | 0.190  | 0.154  | 0.097  | 0.015  | 0.227  | 0.217  |
| JW3489 | b3521 | yjhC  | 15 | 0.009  | 0.009  | 0.140  | 0.141  | -0.012 | 0.820 | 1.985  | 0.411  | 0.117  | 0.060  | 0.091  | 0.192  | 0.005  | 0.194  | 0.134  | 0.193  | 0.211  | 0.327  | 0.072  | -0.057 | 0.235  | 0.043  |
| JW3490 | b3522 | yjhD  | 15 | 0.061  | -0.151 | -0.049 | 0.007  | -0.081 | 0.895 | 1.806  | 0.344  | 0.003  | -0.011 | 0.056  | 0.165  | 0.008  | 0.156  | 0.067  | 0.103  | 0.063  | 0.171  | -0.203 | -0.042 | 0.068  | 0.041  |
| JW3491 | b3523 | yjhE  | 15 | 0.074  | -0.153 | -0.071 | -0.122 | -0.306 | 0.877 | 1.751  | 0.026  | -0.161 | 0.053  | 0.041  | 0.130  | -0.066 | 0.060  | -0.031 | -0.405 | -0.378 | 0.126  | -0.143 | -0.104 | -0.149 | -0.092 |
| JW3492 | b3524 | yjhG  | 15 | 0.009  | 0.008  | 0.030  | -0.050 | -0.173 | 0.777 | 2.098  | 0.303  | 0.053  | 0.033  | 0.007  | -0.098 | -0.037 | 0.025  | -0.031 | 0.118  | 0.124  | 0.133  | -0.002 | -0.034 | -0.023 | -0.009 |
| JW3493 | b3525 | yjhH  | 15 | 0.057  | 0.173  | 0.036  | -0.008 | -0.004 | 0.730 | 1.849  | 0.392  | 0.166  | -0.111 | 0.124  | 0.030  | -0.035 | -0.097 | -0.019 | 0.232  | 0.188  | 0.135  | -0.049 | 0.045  | 0.072  | -0.024 |
| JW3494 | b3526 | kdgK  | 5  | -0.125 | 0.090  | 0.199  | 0.201  | 0.067  | 0.839 | 1.907  | 0.544  | 0.211  | -0.022 | 0.080  | 0.220  | 0.058  | 0.171  | 0.076  | 0.241  | 0.307  | 0.205  | 0.072  | 0.003  | 0.061  | 0.023  |
| JW3495 | b3527 | yjhJ  | 15 | 0.157  | 0.016  | 0.009  | -0.231 | -0.473 | 0.808 | 1.988  | 0.030  | -0.231 | -0.002 | 0.038  | -0.004 | 0.007  | 0.061  | -0.008 | -0.114 | -0.157 | -0.233 | -0.018 | -0.002 | 0.013  | 0.069  |
| JW3496 | b3528 | dctA  | 11 | 0.244  | 0.138  | 0.145  | 0.002  | -0.040 | 0.744 | 2.154  | 0.430  | 0.179  | -0.021 | 0.096  | 0.014  | 0.072  | 0.136  | 0.206  | 0.290  | 0.224  | 0.157  | 0.043  | 0.052  | 0.149  | 0.170  |
| JW3497 | b3529 | yjhK  | 15 | -0.110 | 0.011  | 0.052  | 0.119  | -0.019 | 0.831 | 1.986  | 0.468  | 0.092  | 0.055  | 0.005  | 0.316  | -0.055 | 0.075  | 0.073  | -0.040 | 0.125  | 0.144  | 0.103  | 0.018  | 0.076  | 0.156  |
| JW3498 | b3530 | yjhL  | 15 | 0.151  | 0.116  | 0.209  | -0.035 | -0.224 | 0.926 | 2.145  | 0.092  | -0.215 | -0.031 | -0.069 | 0.214  | 0.073  | 0.085  | 0.008  | -0.264 | -0.039 | -0.198 | 0.295  | -4.208 | -0.131 | 0.084  |
| JW3499 | b3531 | yjhM  | 5  | 0.182  | -0.043 | 0.089  | 0.040  | 0.111  | 0.944 | 2.006  | 0.567  | 0.155  | -0.110 | -0.046 | 0.152  | 0.019  | 0.173  | 0.048  | 0.160  | 0.239  | 0.110  | -0.020 | -0.031 | 0.154  | 0.059  |
| JW3500 | b3532 | yjhN  | 15 | 0.094  | 0.038  | 0.183  | 0.045  | -0.029 | 0.853 | 2.153  | 0.393  | 0.001  | -0.055 | -0.042 | 0.098  | 0.095  | 0.099  | 0.032  | 0.125  | 0.219  | 0.187  | 0.198  | -0.028 | 0.052  | 0.065  |
| JW3501 | b3533 | yjhO  | 15 | 0.028  | -0.137 | -0.162 | -0.095 | -0.162 | 0.963 | 1.849  | 0.210  | -0.208 | -0.020 | -0.045 | 0.118  | -0.049 | -1.504 | -0.082 | -0.119 | -0.082 | -0.095 | -0.070 | -0.008 | 0.060  | 0.035  |
| JW3502 | b3534 | yjhQ  | 15 | 0.094  | 0.045  | 0.278  | 0.190  | -0.002 | 0.720 | 1.895  | 0.356  | 0.191  | -0.004 | 0.035  | 0.347  | 0.129  | -2.915 | 0.142  | 0.137  | 0.255  | 0.182  | 0.172  | 0.051  | 0.075  | 0.140  |
| JW3504 | b3536 | yjhS  | 15 | 0.064  | 0.059  | 0.206  | 0.025  | -0.221 | 0.933 | 2.197  | 0.210  | -0.078 | 0.111  | 0.080  | 0.240  | 0.042  | -6.638 | 0.106  | 0.051  | -0.032 | 0.066  | 0.082  | 0.028  | 0.177  | 0.186  |
| JW3506 | b3538 | yjhU  | 15 | 0.051  | 0.014  | 0.072  | 0.148  | -0.024 | 0.930 | 2.058  | 0.463  | 0.065  | 0.069  | 0.039  | 0.156  | -3.340 | -3.123 | 0.125  | 0.183  | 0.124  | 0.096  | 0.046  | 0.116  | 0.121  | 0.118  |
| JW3507 | b3539 | 603#8 | 15 | -0.123 | 1.052  | 1.223  | 0.692  | 0.254  | 0.467 | 2.640  | 0.017  | 0.358  | -0.077 | 0.001  | -0.235 | -1.607 | -1.505 | 0.651  | -0.424 | -0.425 | 0.840  | 0.491  | 1.151  | 1.265  | 1.562  |
| JW3509 | b3540 | dppF  | 11 | -0.208 | -0.329 | -0.021 | -0.133 | -0.155 | 0.894 | 1.517  | 0.193  | -0.165 | -0.132 | -0.049 | 0.036  | -2.576 | -2.257 | -2.432 | -0.235 | -0.214 | -0.278 | -0.117 | -0.459 | -0.541 | 0.056  |
| JW3510 | b3541 | dppD  | 11 | -0.215 | -0.055 | 0.238  | -0.003 | -0.100 | 0.905 | 2.222  | 0.422  | -0.168 | -0.008 | -0.021 | 0.001  | -4.839 | -4.654 | -4.562 | 0.026  | 0.076  | 0.034  | 0.150  | -0.088 | 0.035  | -0.101 |
| JW3511 | b3542 | dppC  | 11 | 0.039  | 0.049  | 0.059  | 0.013  | -0.082 | 0.576 | 1.419  | 0.345  | -0.026 | -0.067 | 0.028  | -0.022 | -1.575 | -1.387 | -1.570 | 0.047  | 0.019  | -0.030 | 0.098  | -0.247 | 0.009  | -0.169 |
| JW3512 | b3543 | dppB  | 11 | -0.234 | -0.163 | -0.074 | -0.022 | -0.143 | 0.856 | 1.616  | 0.397  | -0.117 | -0.027 | -0.013 | 0.106  | -4.451 | -4.260 | -4.063 | -0.182 | -0.071 | -0.159 | -0.167 | -0.215 | -0.158 | -0.403 |
| JW3513 | b3544 | dppA  | 4  | 0.046  | -0.171 | -0.103 | 0.039  | 0.029  | 0.992 | 1.786  | 0.652  | -0.018 | 0.058  | 0.139  | 0.148  | -0.049 | -0.825 | -0.068 | 0.061  | 0.077  | 0.063  | -0.147 | -0.122 | -0.014 | -0.050 |
| JW3515 | b3546 | yjhJ  | 15 | 0.084  | 0.126  | 0.334  | 0.247  | -0.166 | 1.035 | 1.898  | 0.342  | -0.111 | 0.115  | 0.144  | 0.237  | 0.025  | 0.110  | 0.032  | -0.016 | -0.107 | -0.060 | 0.133  | -0.018 | 0.082  | -0.116 |
| JW3516 | b3547 | yjhX  | 15 | -0.151 | -0.069 | -0.175 | -0.347 | -0.785 | 0.985 | 1.764  | -0.392 | -0.616 | 0.127  | 0.058  | 0.193  | -0.131 | -0.023 | -0.107 | -0.751 | -0.721 | -0.826 | -0.273 | -0.221 | -0.183 | -0.120 |
| JW3517 | b3548 | yjhY  | 15 | -0.048 | 0.057  | 0.098  | 0.150  | -0.046 | 0.805 | 1.892  | 0.392  | 0.118  | 0.095  | 0.042  | 0.081  | 0.054  | 0.128  | 0.093  | 0.216  | 0.131  | 0.151  | -0.003 | 0.033  | 0.002  | 0.202  |
| JW3518 | b3549 | tag   | 10 | 0.149  | 0.174  | 0.118  | 0.173  | -0.021 | 0.758 | 1.648  | 0.286  | 0.129  | -0.055 | 0.095  | -0.051 | 0.048  | 0.129  | 0.192  | 0.074  | 0.000  | 0.030  | -0.059 | 0.112  | -0.104 | 0.106  |
| JW3519 | b3550 | yiaC  | 15 | -0.317 | -0.175 | -0.204 | -0.121 | -0.039 | 0.805 | 1.610  | 0.234  | 0.038  | -0.084 | -0.066 | 0.284  | -0.154 | -0.060 | 0.001  | -0.186 | -0.083 | -0.019 | -0.179 | -0.183 | -0.077 | -0.067 |
| JW3521 | b3552 | yiaD  | 15 | -0.009 | 0.007  | 0.155  | 0.198  | 0.214  | 0.751 | 1.624  | 0.514  | 0.154  | 0.004  | -0.047 | 0.161  | -0.045 | 0.120  | 0.028  | 0.056  | 0.217  | 0.230  | 0.095  | -0.081 | 0.231  | 0.068  |
| JW3522 | b3553 | yiaE  | 15 | 0.048  | 0.092  | 0.079  | 0.059  | 0.154  | 0.982 | 2.167  | 0.638  | 0.078  | 0.092  | 0.052  | 0.098  | 0.095  | 0.234  | 0.083  | 0.238  | 0.296  | 0.226  | 0.030  | 0.035  | 0.041  | 0.163  |
| JW3523 | b3554 | yiaF  | 15 | -0.010 | 0.192  | 0.123  | 0.063  | 0.197  | 0.888 | 1.693  | 0.575  | 0.268  | -0.077 | -0.056 | 0.097  | -0.099 | -0.041 | -0.153 | 0.321  | 0.281  | 0.253  | 0.092  | 0.025  | 0.034  | -0.061 |
| JW3524 | b3555 | yiaG  | 15 | -0.108 | 0.105  | 0.102  | 0.293  | 0.304  | 0.821 | 1.946  | 0.858  | 0.372  | 0.139  | 0.183  | 0.352  | 0.157  | 0.321  | 0.250  | 0.406  | 0.494  | 0.513  | -0.044 | 0.221  | 0.415  | 0.260  |
| JW3525 | b3556 | cspA  | 14 | -0.088 | 0.103  | 0.268  | 0.242  | 0.250  | 0.654 | 1.787  | 0.613  | 0.101  | 0.034  | 0.223  | 0.340  | 0.151  | 0.195  | 0.107  | 0.274  | 0.254  | 0.277  | 0.097  | 0.151  | 0.212  | 0.102  |
| JW3530 | b3559 | glyS  | 12 | 0.050  | 0.024  | 0.240  | 0.341  | 0.231  | 1.046 | 2.017  | 0.456  | 0.077  | -0.006 | 0.029  | 0.222  | 0.159  | 0.181  | 0.153  | 0.196  | 0.277  | 0.282  | 0.146  | -0.115 | 0.067  | 0.033  |
| JW3531 | b3560 | glyQ  | 12 | -0.214 | 0.002  | 0.379  | 0.735  | 0.180  | 0.932 | 1.715  | 0.208  | 0.094  | 0.011  | 0.013  | 0.093  | -0.135 | -0.161 | -0.193 | 0.125  | 0.064  | 0.048  | 0.104  | -0.191 | 0.104  | -0.234 |
| JW3532 | b3560 | 601#3 | 15 | 0.117  | 0.051  | 0.148  | 0.173  | 0.040  | 0.776 | 2.037  | 0.453  | 0.158  | 0.108  | 0.062  | 0.096  | 0.194  | 0.130  | 0.048  | 0.262  | 0.032  | -0.121 | 0.023  | 0.001  | 0.229  | 0.056  |
| JW3533 | b3561 | yiaH  | 15 | -0.088 | 0.172  | 0.098  | 0.032  | -0.145 | 0.911 | 0.227  | 0.178  | -0.032 | -0.022 | -4.895 | 0.109  | 0.113  | 0.238  | 0.234  | 0.046  | -0.080 | -0.001 | -0.057 | 0.103  | 0.320  | 0.265  |
| JW3534 | b3562 | yiaA  | 15 | -0.217 | -0.204 | -0.491 | -0.607 | -1.090 | 0.731 | -0.154 | -0.866 | -0.731 | 0.214  | -1.166 | 0.377  | -0.236 | -0.046 | -0.018 | -0.826 | -0.906 | -0.844 | -0.397 | -0.268 | -0.059 | 0.150  |
| JW3535 | b3563 | yiaB  | 15 | -0.032 | -0.079 | -0.290 | -0.030 | 0.033  | 0.934 | -0.051 | 0.347  | 0.107  | -0.364 | 0.063  | 0.323  | -0.257 | 0.058  | -0.012 | 0.045  | 0.057  | 0.182  | -0.281 | -0.117 | 0.015  | -0.002 |
| JW3536 | b3564 | xyiB  | 6  | 0.089  | -0.104 | 0.023  | 0.017  | 0.018  | 1.036 | 0.053  | 0.357  | -0.027 | -5.499 | -0.123 | 0.300  | 0.024  | 0.185  | 0.037  | 0.077  | 0.082  | 0.090  | -0.058 | -0.039 | 0.039  | 0.042  |
| JW3537 | b3565 | xyiA  | 6  | 0.063  | -0.024 | 0.056  | 0.076  | 0.228  | 1.063 | 0.043  | 0.490  | 0.113  | -5.210 | -0.038 | 0.236  | -0.021 | 0.154  | 0.049  | 0.204  | 0.173  | 0.033  | 0.012  | 0.004  | 0.162  | 0.033  |
| JW3538 | b3566 | xyiF  | 11 | -0.010 | -0.149 | -0.140 | -0.085 | -0.173 | 0.954 | 0.019  | 0.212  | -0.058 | -0.874 | -0.045 | 0.054  | -0.191 | 0.054  | -0.103 | -0.007 | -0.050 | -0.002 | -0.173 | -0.232 | -0.037 | -5.140 |
| JW3539 | b3567 | xyiG  | 11 | 0.002  | 0.117  | 0.114  | 0.063  | 0.091  | 0.888 | 0.119  | 0.444  | 0.129  | -0.046 | 0.008  | 0.076  | 0.024  | 0.094  | -0.012 | 0.181  | 0.215  | 0.181  | 0.122  | -0.041 | 0.139  | -7.463 |
| JW3540 | b3568 | xyiH  | 11 | -0.171 | 0.125  | 0.089  | -0.019 | -0.160 | 0.913 | 0.033  | 0.284  | -0.017 | -0.028 | 0.107  | 0.058  | 0.119  | 0.056  | 0.065  | 0.063  | -0.057 | -0.092 | 0.096  | 0.079  | -0.056 | -8.306 |
| JW3541 | b3569 | xyiR  | 6  | -0.102 | -0.040 | 0.049  | 0.111  | 0.041  | 0.882 | -0.053 | 0.176  | 0.111  | 0.011  | 0.098  | 0.327  | -0.031 | 0.169  | 0.079  | 0.035  | 0.035  | -0.025 | -0.003 | -0.012 | 0.150  | -6.684 |
| JW3542 | b3570 | bax   | 15 | 0.105  | 0.016  | 0.145  | 0.198  | 0.175  | 0.747 | 0.138  | 0.446  | 0.348  | 0.024  | 0.050  | 0.167  | 0.091  | 0.136  | 0.100  | 0.336  | 0.233  | 0.328  | 0.     |        |        |        |



|        |       |             |    |         |         |         |         |         |         |         |         |         |         |         |         |         |         |         |         |         |         |         |         |         |         |         |   |   |
|--------|-------|-------------|----|---------|---------|---------|---------|---------|---------|---------|---------|---------|---------|---------|---------|---------|---------|---------|---------|---------|---------|---------|---------|---------|---------|---------|---|---|
| JW3677 | b3700 | recF        | 10 | 0.200   | -0.065  | 0.057   | 0.089   | 0.172   | 0.066   | 0.101   | 0.151   | 0.197   | -0.070  | 0.056   | -0.055  | -0.088  | -0.040  | -0.006  | 0.086   | 0.201   | 0.045   | -0.014  | -0.180  | 0.211   | 0.105   |         |   |   |
| JW3678 | b3701 | dnaN        | 10 | -0.265  | -0.118  | -0.007  | 0.081   | 0.018   | -0.015  | -0.189  | -0.004  | 0.078   | 0.007   | 0.057   | 0.248   | -0.022  | 0.050   | 0.052   | -0.027  | 0.051   | 0.038   | 0.053   | -0.324  | -0.095  | -0.138  |         | 1 |   |
| JW3679 | b3702 | dnaA        | 10 | 0.150   | 0.109   | 0.330   | 0.333   | 0.173   | 0.141   | 0.110   | 0.183   | 0.104   | -0.040  | 0.104   | 0.136   | 0.115   | 0.228   | 0.154   | 0.199   | 0.101   | 0.115   | 0.277   | 0.103   | -0.036  | -0.052  |         | 1 |   |
| JW3680 | b3703 | rpmH        | 12 | 0.225   | 0.421   | 0.388   | 0.332   | 0.081   | -0.070  | 0.095   | 0.305   | 0.450   | 0.508   | 0.212   | 0.589   | 0.316   | 0.315   | 0.241   | 0.179   | 0.179   | 0.457   | 0.510   | 0.046   | -0.220  | 0.486   |         | 1 |   |
| JW3681 | b3704 | rnpA        | 8  | 0.119   | 0.064   | 0.120   | 0.214   | 0.258   | 0.088   | 0.185   | 0.332   | 0.310   | -0.076  | -0.001  | 0.040   | 0.046   | 0.186   | 0.099   | 0.340   | 0.378   | 0.349   | 0.038   | 0.001   | 0.175   | 0.133   |         | 1 |   |
| JW3682 |       | yidD        | 15 | 0.080   | 0.071   | 0.122   | 0.144   | 0.205   | -0.056  | 0.155   | 0.269   | 0.326   | 0.005   | 0.047   | -0.025  | -0.098  | 0.046   | 0.141   | 0.423   | 0.381   | 0.402   | -0.056  | 0.074   | 0.238   | 0.173   |         | 1 |   |
| JW3683 | b3705 | yidC        | 15 | -0.103  | 0.145   | 0.175   | 0.269   | 0.124   | -0.042  | -0.047  | 0.265   | 0.271   | 0.118   | 0.114   | 0.355   | 0.045   | 0.167   | 0.092   | 0.338   | 0.508   | 0.388   | 0.044   | 0.169   | 0.207   | 0.057   |         | 1 |   |
| JW3684 | b3706 | thdF        | 4  | -0.260  | -0.035  | 0.081   | 0.108   | -0.193  | 0.097   | -0.097  | -0.055  | -0.107  | 0.072   | 0.108   | 0.334   | 0.225   | 0.297   | 0.179   | -0.101  | 0.002   | -0.006  | -0.031  | -0.110  | -0.058  | -0.266  |         | 1 |   |
| JW3686 | b3708 | tnaA        | 5  | -0.144  | -0.138  | -0.048  | 0.107   | 0.059   | 0.137   | 0.005   | 0.207   | 0.127   | 0.073   | 0.089   | 0.229   | -0.024  | 0.063   | -0.014  | 0.254   | 0.151   | 0.233   | -0.080  | -0.085  | 0.002   | -5.082  | 1       |   |   |
| JW3687 | b3709 | tnaB        | 11 | -0.203  | -0.100  | 0.007   | -0.065  | -0.442  | 0.097   | 0.091   | -0.333  | -0.329  | 0.148   | 0.156   | 0.268   | 0.015   | 0.196   | 0.117   | -0.252  | -0.419  | -0.448  | -0.122  | -0.034  | -0.172  | -3.702  | 1       |   |   |
| JW3688 | b3710 | yidY        | 15 | -0.259  | -0.236  | -0.124  | -0.073  | -0.200  | 0.042   | 0.039   | -0.082  | -0.090  | -0.029  | 0.152   | 0.054   | -0.062  | 0.095   | 0.066   | -0.132  | -0.100  | -0.111  | -0.233  | -0.066  | -0.033  | -0.020  |         | 1 |   |
| JW3689 | b3711 | yidZ        | 9  | -0.301  | -0.156  | -0.162  | -0.031  | 0.029   | 0.027   | -0.097  | -0.045  | 0.084   | -0.012  | -0.019  | 0.255   | -0.135  | -0.006  | -0.027  | 0.001   | 0.045   | 0.169   | -0.014  | -0.196  | -0.114  | 0.017   |         | 1 |   |
| JW3690 | b3712 | yieE        | 15 | 0.036   | 0.083   | -0.011  | 0.140   | 0.018   | 0.020   | 0.003   | -0.002  | 0.046   | -0.161  | -0.095  | 0.230   | -0.092  | 0.078   | -0.011  | 0.044   | 0.053   | 0.182   | 0.034   | 0.008   | 0.087   | 0.043   |         | 1 |   |
| JW3691 | b3713 | yieF        | 15 | 0.083   | -0.052  | 0.041   | 0.097   | 0.127   | 0.161   | 0.031   | 0.178   | 0.063   | -0.034  | -0.024  | 0.093   | -0.016  | 0.048   | -0.043  | 0.049   | 0.074   | 0.190   | 0.079   | -0.097  | 0.005   | -0.067  |         | 1 |   |
| JW3692 | b3714 | yieG        | 15 | -0.251  | 0.056   | -0.168  | -0.162  | -0.298  | 0.177   | -0.032  | -0.121  | -0.237  | 0.029   | 0.051   | -0.162  | -0.268  | -0.106  | -0.262  | -0.142  | -0.225  | -0.238  | -0.142  | -0.543  | -0.167  | -0.460  |         | 1 |   |
| JW3693 | b3715 | yieH        | 15 | -2.680  | 0.080   | -0.029  | -0.620  | -2.326  | 0.111   | 0.167   | -2.137  | -1.955  | -0.048  | -0.066  | 0.021   | 0.108   | 0.042   | -0.015  | -2.142  | -2.016  | -1.999  | 0.044   | -0.083  | -3.882  | -0.162  | 1       |   |   |
| JW3694 | b3716 | yieI        | 15 | -4.972  | -0.249  | -0.553  | -0.664  | -1.086  | -0.107  | -0.181  | -0.893  | -0.892  | -0.282  | -0.234  | -0.240  | -0.341  | -0.160  | -0.260  | -0.897  | -0.940  | -1.159  | -0.509  | -0.202  | -5.494  | -0.082  | 1       |   |   |
| JW3695 | b3717 | yieJ        | 15 | -3.942  | -0.058  | -0.077  | -0.807  | -3.276  | 0.031   | -0.036  | -3.361  | -2.910  | -0.047  | -0.045  | 0.129   | -0.045  | 0.064   | 0.051   | -3.321  | -3.059  | -3.256  | -0.055  | -0.113  | -4.452  | -0.485  | 1       |   |   |
| JW3696 | b3718 | yieK        | 15 | -1.821  | -0.234  | -0.097  | 0.042   | -0.066  | 0.076   | -0.147  | -0.036  | 0.082   | -0.125  | -0.071  | 0.065   | -0.197  | -0.095  | -0.113  | -0.130  | -0.191  | -0.065  | -0.154  | -0.281  | -2.119  | 0.058   | 1       |   |   |
| JW3697 | b3719 | yieL        | 15 | -5.609  | 0.044   | 0.068   | 0.105   | 0.121   | 0.235   | 0.132   | 0.033   | -0.030  | -0.039  | -0.004  | 0.029   | 0.164   | 0.023   | 0.062   | -0.026  | -0.019  | 0.050   | -0.021  | -5.800  | 0.029   | 1       |         |   |   |
| JW3698 | b3720 | yieC        | 15 | -7.113  | 0.064   | -0.058  | -0.004  | 0.095   | 0.212   | 0.173   | 0.070   | -0.080  | -0.183  | -0.118  | 0.058   | -0.124  | 0.107   | -0.002  | -0.037  | -0.017  | -0.123  | -0.072  | -0.192  | -7.141  | 0.063   | 1       |   |   |
| JW3699 | b3721 | gibB        | 6  | -7.057  | 0.038   | -0.111  | -0.013  | 0.379   | 0.117   | 0.045   | 0.127   | 0.099   | -0.205  | -0.087  | -0.082  | -5.575  | 0.078   | 0.013   | 0.178   | 0.125   | 0.135   | -0.259  | -0.168  | -7.174  | 0.101   | 1       |   |   |
| JW3700 | b3722 | gibF        | 11 | -7.141  | -0.051  | -0.045  | 0.107   | -0.157  | 0.088   | -0.027  | -0.025  | -0.048  | -0.110  | -0.127  | -0.358  | -6.477  | 0.085   | 0.057   | -0.119  | -0.105  | -0.034  | -0.085  | -0.121  | -6.965  | 0.071   | 1       |   |   |
| JW3701 | b3723 | gibG        | 6  | -4.794  | 0.143   | 0.041   | 0.107   | 0.041   | 0.062   | 0.045   | 0.097   | 0.122   | -0.111  | 0.011   | -4.051  | -2.282  | 0.289   | 0.247   | 0.118   | 0.084   | 0.127   | 0.011   | 0.049   | -4.857  | 0.183   | 1       |   |   |
| JW3702 | b3724 | phoU        | 9  | 0.057   | 0.098   | 0.250   | 0.280   | 0.246   | 0.154   | 0.121   | 0.259   | 0.342   | -0.058  | 0.029   | 0.176   | 0.057   | 0.159   | 0.052   | 0.232   | 0.145   | 0.276   | 0.171   | -0.008  | 0.073   | 0.147   |         | 1 |   |
| JW3703 | b3725 | pstB        | 11 | 0.061   | 0.112   | 0.203   | 0.328   | 0.244   | 0.141   | 0.164   | 0.282   | 0.485   | -0.069  | 0.008   | 0.083   | 0.068   | 0.116   | 0.095   | 0.359   | 0.228   | 0.211   | 0.181   | 0.083   | 0.122   | 0.085   |         | 1 |   |
| JW3704 | b3726 | pstA        | 11 | -0.214  | -0.134  | -0.095  | -0.002  | -0.216  | 0.113   | -0.060  | 0.007   | -0.056  | -0.104  | -0.114  | -0.034  | -0.139  | -0.106  | -0.146  | -0.075  | -0.028  | -0.113  | -0.133  | -0.222  | -0.095  | -0.086  |         | 1 |   |
| JW3705 | b3727 | pstC        | 11 | -0.177  | 0.006   | -0.074  | -0.042  | -0.373  | 0.018   | -0.040  | -0.112  | -0.153  | 0.046   | -0.034  | 0.006   | -0.016  | 0.045   | -0.010  | -0.032  | -0.254  | -0.004  | -0.169  | -0.029  | -0.066  | 0.095   |         | 1 |   |
| JW3706 | b3728 | pstS        | 11 | -0.315  | 0.104   | -0.086  | 0.114   | 0.108   | 0.043   | -0.137  | 0.275   | 0.188   | 0.043   | 0.113   | -0.038  | 0.019   | 0.122   | 0.144   | 0.237   | 0.187   | 0.186   | -0.036  | 0.052   | 0.161   | 0.211   |         | 1 |   |
| JW3707 | b3729 | gimS        | 5  | -0.165  | -0.188  | -0.075  | 0.031   | -0.043  | 0.172   | -0.103  | 0.097   | -0.093  | 0.064   | 0.101   | 0.005   | -0.035  | 0.036   | -0.076  | 0.075   | 0.039   | 0.036   | -0.176  | -0.139  | 0.019   | 0.039   |         | 1 |   |
| JW3708 | b3730 | gimU        | 5  | -0.111  | -0.063  | 0.074   | 0.092   | -0.028  | 0.157   | 0.038   | 0.127   | -0.004  | 0.054   | 0.069   | -0.048  | -0.008  | 0.075   | 0.007   | 0.184   | 0.025   | 0.046   | -0.018  | -0.084  | -0.036  | 0.004   |         | 1 |   |
| JW3709 | b3731 | atpC / uncC | 3  | 0.175   | 0.157   | 0.308   | 0.309   | 0.278   | 0.101   | 0.254   | 0.363   | 0.347   | 0.051   | 0.082   | 0.137   | 0.183   | 0.268   | 0.183   | 0.447   | 0.401   | 0.452   | 0.217   | 0.134   | 0.185   | 0.209   |         | 1 |   |
| JW3710 | b3732 | uncD / atpD | 3  | 0.156   | 0.149   | 0.264   | 0.279   | 0.258   | 0.088   | 0.282   | 0.372   | 0.330   | -0.008  | 0.168   | 0.035   | 0.108   | 0.121   | 0.149   | 0.373   | 0.343   | 0.366   | 0.183   | 0.004   | 0.231   | 0.186   |         | 1 |   |
| JW3711 | b3733 | atpG        | 6  | -0.009  | 0.018   | 0.135   | 0.162   | 0.321   | -0.004  | 0.009   | 0.290   | 0.404   | -0.079  | -0.018  | 0.222   | -0.004  | 0.048   | 0.032   | 0.153   | 0.227   | 0.313   | 0.157   | -0.043  | 0.103   | 0.118   |         | 1 |   |
| JW3712 | b3734 | atpA        | 6  | -0.115  | -0.032  | 0.252   | 0.178   | 0.150   | 0.066   | 0.162   | 0.202   | 0.156   | 0.091   | -0.005  | 0.331   | 0.122   | 0.267   | 0.118   | 0.136   | 0.265   | 0.206   | 0.203   | 0.065   | 0.068   | 0.190   |         | 1 |   |
| JW3713 | b3735 | atpH        | 6  | 0.325   | 0.228   | 0.278   | 0.346   | 0.506   | 0.129   | 0.275   | 0.456   | 0.351   | -0.112  | 0.052   | 0.221   | 0.206   | 0.290   | 0.189   | 0.300   | 0.290   | 0.305   | 0.351   | 0.161   | 0.323   | 0.264   |         | 1 |   |
| JW3714 | b3736 | atpF        | 6  | Invalid |   | 1 |
| JW3715 | b3737 | atpE        | 6  | -0.078  | 0.013   | -0.138  | 0.141   | 0.245   | 0.020   | 0.044   | 0.343   | 0.331   | -0.164  | -0.033  | 0.318   | -0.069  | 0.149   | 0.119   | 0.270   | 0.292   | 0.373   | -0.088  | 0.014   | 0.229   | 0.231   |         | 1 |   |
| JW3716 | b3738 | atpB        | 6  | -0.013  | 0.085   | 0.075   | 0.224   | 0.238   | 0.067   | 0.063   | 0.363   | 0.198   | 0.113   | 0.095   | 0.330   | 0.094   | 0.150   | 0.102   | 0.264   | 0.201   | 0.390   | 0.107   | 0.065   | 0.148   | 0.230   |         | 1 |   |
| JW3717 | b3739 | atpI        | 6  | 0.173   | 0.089   | 0.026   | 0.219   | 0.333   | 0.184   | 0.176   | 0.435   | 0.230   | -0.056  | 0.053   | 0.296   | 0.082   | 0.303   | 0.168   | 0.388   | 0.242   | 0.381   | 0.018   | 0.074   | 0.200   | 0.224   |         | 1 |   |
| JW3718 | b3740 | gidB        | 10 | -0.039  | 0.165   | -0.041  | 0.119   | 0.163   | 0.114   | 0.005   | 0.192   | 0.111   | 0.067   | 0.088   | 0.223   | -0.009  | 0.077   | -0.033  | 0.197   | 0.075   | 0.212   | -0.025  | 0.068   | 0.086   | 0.232   |         | 1 |   |
| JW3719 | b3741 | gidA        | 10 | -0.113  | 0.146   | 0.030   | 0.025   | 0.139   | 0.124   | 0.100   | 0.225   | 0.104   | 0.042   | 0.056   | 0.149   | 0.094   | 0.258   | 0.078   | 0.113   | 0.131   | 0.188   | -0.031  | -0.086  | -0.029  | 0.168   |         | 1 |   |
| JW3720 | b3742 | mioC        | 10 | -0.147  | -0.104  | -0.233  | -0.164  | 0.077   | -0.021  | -0.056  | 0.194   | 0.151   | -0.147  | -0.043  | 0.035   | -0.177  | -0.056  | -0.128  | 0.031   | 0.069   | 0.066   | -0.206  | -0.202  | 0.049   | 0.005   |         | 1 |   |
| JW3721 | b3743 | asnC        | 1  | -0.353  | 0.076   | 0.144   | 0.132   | 0.037   | 0.071   | 0.097   | 0.120   | 0.092   | 0.023   | 0.104   | 0.308   | 0.043   | 0.222   | 0.187   | 0.137   | 0.087   | 0.158   | 0.061   | 0.069   | 0.238   | -0.008  |         | 1 |   |
| JW3722 | b3744 | asnA        | 1  | -0.072  | -0.072  | -0.118  | -0.083  | 0.076   | 0.039   | -0.059  | 0.073   | 0.068   | -0.198  | -0.170  | 0.024   | -0.110  | -0.093  | -0.136  | 0.169   | 0.179   | 0.101   | -0.186  | -0.185  | -0.048  | 0.029   |         | 1 |   |
| JW3723 | b3745 | yieM        | 15 | -0.306  | 0.142   | 0.255   | 0.217   | -0.027  | 0.038   | 0.101   | 0.096   | 0.034   | 0.034   | 0.084   | 0.339   | 0.090   | 0.265   | 0.209   | 0.088   | 0.140   | 0.147   | 0.157   | 0.019   | -0.125  | 0.131   |         | 1 |   |
| JW3725 | b3746 | yieN        | 15 | -0.160  | 0.151   | 0.216   | 0.203   | -0.113  | 0.108   | 0.136   | 0.024   |         |         |         |         |         |         |         |         |         |         |         |         |         |         |         |   |   |



|        |       |                  |    |        |        |        |        |        |        |        |        |        |        |        |        |        |        |        |        |        |        |        |         |        |        |   |   |
|--------|-------|------------------|----|--------|--------|--------|--------|--------|--------|--------|--------|--------|--------|--------|--------|--------|--------|--------|--------|--------|--------|--------|---------|--------|--------|---|---|
| JW3769 | b3793 | rfft             | 3  | 0.070  | -0.033 | -0.052 | -0.046 | -0.054 | -0.026 | 0.085  | -0.049 | 0.053  | -0.072 | 0.051  | -0.068 | -0.032 | 0.070  | 0.033  | 0.065  | 0.110  | 0.085  | -0.136 | -0.025  | 0.143  | 0.060  |   |   |
| JW3770 | b3794 | wecG / rffM      | 3  | -0.641 | -0.504 | -0.351 | -0.250 | -0.357 | -0.006 | -0.516 | -0.314 | -0.285 | 0.016  | 0.108  | 0.251  | -0.453 | -0.376 | -0.448 | 0.211  | 0.090  | 0.062  | -0.471 | -0.351  | 0.174  | -0.404 |   | 1 |
| JW3771 | b3795 | yifK             | 11 | -0.062 | -0.080 | 0.018  | 0.129  | -0.126 | 0.019  | -0.091 | -0.043 | -0.020 | 0.031  | 0.036  | 0.174  | 0.082  | 0.066  | 0.035  | 0.099  | 0.042  | 0.029  | -0.048 | -0.120  | -0.052 | -0.032 |   | 1 |
| JW3772 | b3800 | asiB             | 5  | -0.140 | -0.306 | -0.226 | -0.289 | -0.530 | 0.005  | -0.130 | -0.297 | -0.338 | -0.132 | -0.153 | -0.086 | -0.186 | -0.241 | -0.274 | -0.355 | -0.362 | -0.328 | -0.138 | -0.585  | -0.240 | -0.231 |   | 1 |
| JW3773 | b3801 | asiA             | 5  | -0.127 | -3.420 | -3.685 | -1.222 | -0.461 | -0.011 | -3.389 | -0.409 | -0.293 | -0.138 | -0.062 | -3.394 | -3.585 | -3.401 | -3.330 | -0.295 | -0.205 | -0.315 | -3.460 | -3.614  | -3.551 | -3.580 | 1 |   |
| JW3774 | b3802 | hemY             | 15 | -0.010 | -0.074 | 0.031  | -0.023 | -0.178 | 0.062  | -0.005 | -0.087 | 0.026  | -0.122 | -0.141 | -0.052 | 0.007  | 0.064  | 0.025  | 0.074  | 0.058  | -0.009 | -0.002 | -0.156  | -0.033 | 0.051  |   | 1 |
| JW3775 | b3803 | hemX             | 2  | -0.313 | -0.130 | 0.097  | 0.094  | -0.055 | -0.047 | -0.114 | 0.078  | 0.124  | -0.051 | 0.130  | 0.233  | 0.047  | 0.033  | 0.092  | 0.120  | 0.119  | 0.089  | -0.008 | 0.081   | 0.044  | 0.035  |   | 1 |
| JW3776 | b3804 | hemD             | 2  | -0.156 | 0.020  | 0.061  | 0.119  | 0.039  | -0.031 | -0.150 | 0.081  | 0.038  | 0.018  | 0.095  | 0.098  | 0.130  | 0.115  | 0.035  | 0.152  | 0.116  | 0.144  | 0.005  | -0.021  | 0.022  | 0.020  |   | 1 |
| JW3777 | b3805 | hemC             | 2  | 0.003  | -0.089 | 0.044  | 0.128  | -0.034 | 0.060  | -0.113 | -0.046 | -0.004 | 0.063  | 0.082  | 0.245  | 0.089  | 0.041  | 0.035  | 0.018  | -0.011 | 0.188  | -0.015 | -0.150  | 0.038  | -0.008 |   | 1 |
| JW3778 | b3806 | cyaA             | 9  | -0.054 | 0.105  | 0.218  | 0.171  | 0.031  | 0.079  | 0.039  | 0.053  | 0.035  | 0.025  | 0.110  | 0.167  | 0.107  | 0.129  | 0.101  | 0.043  | 0.043  | 0.006  | 0.140  | 0.040   | 0.096  | 0.039  |   | 1 |
| JW3779 | b3807 | cyaY             | 15 | -0.227 | 0.005  | -0.037 | 0.121  | -0.094 | -0.031 | 0.058  | 0.062  | 0.106  | 0.057  | 0.107  | 0.086  | 0.093  | 0.113  | 0.058  | 0.044  | -0.157 | 0.100  | -0.075 | -0.436  | 0.022  | -0.108 |   | 1 |
| JW3780 | b3808 | ycyX             | 15 | -0.109 | -0.643 | -0.764 | -0.554 | -0.743 | 0.039  | -0.516 | -0.482 | 0.033  | 0.113  | 0.012  | 0.167  | 0.244  | 0.241  | -0.431 | -0.391 | -0.459 | -0.690 | -0.590 | -0.051  | 0.053  |        | 1 |   |
| JW3781 |       | yifL             | 15 | -0.071 | -0.009 | 0.080  | 0.058  | 0.108  | -0.084 | -0.004 | 0.185  | 0.230  | -0.078 | 0.027  | 0.218  | 0.060  | -0.031 | 0.149  | 0.197  | 0.254  | 0.283  | 0.027  | 0.020   | 0.154  | 0.267  |   | 1 |
| JW3782 | b3809 | dapF             | 1  | -0.047 | -0.051 | 0.003  | -0.045 | -0.167 | -0.010 | -0.109 | -0.120 | 0.046  | 0.016  | 0.048  | 0.173  | -0.028 | -0.032 | 0.008  | -0.145 | -0.124 | -0.136 | -0.014 | -0.172  | -0.067 | 0.114  |   | 1 |
| JW3783 | b3810 | yigA             | 15 | 0.020  | 0.070  | 0.204  | 0.232  | 0.140  | 0.072  | 0.106  | 0.240  | 0.089  | -0.062 | 0.047  | 0.163  | 0.118  | 0.144  | 0.103  | 0.239  | 0.377  | -0.164 | 0.237  | 0.019   | 0.138  | 0.132  |   | 1 |
| JW3784 | b3811 | xerC             | 10 | -0.203 | -0.001 | 0.107  | 0.014  | -0.056 | 0.041  | 0.044  | 0.019  | -0.043 | -0.053 | -0.002 | -0.017 | 0.072  | 0.083  | 0.020  | 0.076  | 0.111  | -0.106 | 0.085  | -0.247  | 0.084  | -0.087 |   | 1 |
| JW3785 | b3812 | yigB             | 15 | -0.128 | 0.088  | 0.235  | 0.249  | 0.069  | 0.030  | 0.143  | 0.098  | 0.161  | -0.057 | 0.036  | -0.038 | 0.136  | 0.044  | 0.123  | 0.190  | 0.253  | -0.088 | 0.243  | 0.087   | 0.097  | 0.113  |   | 1 |
| JW3786 | b3813 | uvrD             | 10 | 0.128  | -0.145 | 0.147  | 0.141  | -0.028 | 0.034  | 0.087  | 0.033  | 0.098  | -0.018 | 0.038  | -0.076 | 0.155  | 0.029  | 0.110  | 0.077  | 0.154  | -0.080 | 0.180  | -0.005  | 0.115  | -0.054 |   | 1 |
| JW3787 | b3814 | (yigE)           | 15 | 0.022  | 0.056  | 0.089  | 0.159  | 0.209  | 0.050  | 0.085  | 0.254  | 0.241  | -0.020 | 0.061  | 0.266  | 0.031  | -0.065 | 0.122  | 0.156  | 0.226  | -4.270 | 0.028  | -0.184  | 0.307  | 0.359  | 1 |   |
| JW3788 | b3815 | yigF             | 15 | -0.062 | -0.031 | -0.043 | 0.070  | 0.104  | -0.004 | 0.044  | 0.100  | 0.142  | -0.009 | 0.034  | 0.286  | 0.037  | 0.082  | 0.051  | 0.067  | 0.142  | -1.928 | 0.109  | -0.047  | 0.175  | 0.177  | 1 |   |
| JW3789 | b3816 | corA             | 11 | 0.097  | 0.011  | 0.041  | 0.041  | 0.051  | 0.069  | 0.026  | 0.024  | 0.010  | 0.044  | 0.024  | 0.099  | 0.065  | 0.031  | -0.026 | 0.024  | 0.031  | 0.049  | 0.148  | -0.050  | 0.026  | 0.278  |   | 1 |
| JW3790 | b3817 | yigF             | 15 | -3.418 | -3.413 | -4.259 | -4.169 | -4.018 | 0.178  | -3.268 | -3.749 | -3.255 | -0.058 | 0.096  | -3.328 | -3.900 | -3.480 | -3.428 | -3.896 | -3.706 | -4.174 | -3.524 | -0.325  | 0.027  | -3.536 | 1 |   |
| JW3791 | b3818 | yigG             | 15 | -3.441 | -3.074 | -4.207 | -3.850 | -3.422 | 0.072  | -3.145 | -3.065 | -2.848 | -0.106 | 0.079  | -3.303 | -3.736 | -3.331 | -3.298 | -3.486 | -3.402 | -4.007 | -3.222 | -0.417  | -0.064 | -3.405 | 1 |   |
| JW3792 | b3819 | radD             | 15 | -0.111 | 0.231  | 0.028  | 0.004  | 0.083  | 0.018  | 0.241  | -0.135 | 0.212  | 0.099  | 0.093  | 0.005  | 0.092  | 0.070  | 0.033  | 0.084  | 0.103  | 0.066  | 0.171  | -0.032  | -0.018 | 0.336  |   | 1 |
| JW3793 | b3820 | yigH             | 15 | -0.175 | -0.080 | 0.173  | 0.163  | -0.020 | -0.118 | 0.079  | 0.000  | 0.190  | 0.039  | 0.085  | 0.190  | -0.132 | -0.179 | -0.032 | 0.067  | 0.130  | 0.092  | 0.176  | -0.023  | 0.101  | 0.247  |   | 1 |
| JW3794 | b3821 | pldA             | 5  | -0.060 | 0.043  | 0.082  | 0.082  | -0.188 | -0.073 | 0.074  | -0.159 | -0.009 | 0.035  | 0.025  | 0.221  | 0.073  | 0.068  | 0.110  | -0.029 | 0.027  | 0.111  | 0.157  | 0.024   | 0.110  | 0.188  |   | 1 |
| JW3795 | b3822 | recQ             | 10 | -0.013 | -0.137 | -0.090 | 0.399  | -0.127 | 0.078  | -0.080 | -0.152 | -0.056 | -0.104 | -0.119 | 0.089  | 0.010  | 0.095  | 0.082  | -0.045 | 0.014  | -0.173 | -0.072 | 0.033   | -0.181 | 0.093  |   | 1 |
| JW3797 | b3823 | yigJ             | 11 | -0.177 | 0.056  | -0.043 | -0.251 | -0.479 | -0.007 | 0.027  | -0.362 | -0.308 | -0.308 | -0.203 | -0.214 | -0.139 | -0.042 | -0.017 | -0.327 | -0.352 | -0.360 | 0.030  | -0.451  | -0.099 | 0.015  |   | 1 |
| JW3798 | b3824 | yigK             | 11 | 0.001  | 0.111  | 0.324  | 0.083  | 0.232  | 0.082  | 0.219  | 0.262  | 0.233  | -0.030 | 0.008  | 0.069  | -0.021 | -0.027 | 0.001  | 0.214  | 0.313  | 0.283  | 0.145  | -0.078  | 0.120  | 0.168  |   | 1 |
| JW3799 | 551#4 |                  | 15 | -0.191 | 0.169  | 0.087  | 0.052  | 0.001  | 0.046  | 0.315  | 0.117  | 0.142  | 0.045  | 0.061  | 0.054  | 0.165  | 0.126  | 0.182  | 0.194  | 0.132  | 0.141  | 0.130  | 0.063   | 0.211  | 0.325  |   | 1 |
| JW3800 | b3825 | pldB             | 5  | -0.359 | 0.048  | 0.191  | 0.188  | 0.132  | -0.096 | 0.035  | 0.185  | 0.311  | 0.041  | 0.069  | 0.209  | -0.011 | 0.018  | 0.126  | 0.264  | 0.363  | 0.287  | 0.104  | 0.050   | 0.143  | 0.230  |   | 1 |
| JW3801 |       | (yigL)           | 15 | -0.065 | 0.114  | 0.182  | 0.244  | 0.312  | -0.001 | 0.027  | 0.305  | 0.280  | -0.031 | 0.066  | 0.203  | 0.033  | 0.177  | 0.087  | 0.282  | 0.365  | 0.339  | 0.092  | 0.153   | 0.250  | 0.066  |   | 1 |
| JW3803 | b3827 | yigM             | 15 | 0.091  | -0.064 | 0.077  | 0.151  | 0.036  | -0.052 | 0.042  | 0.086  | 0.190  | -0.104 | -0.110 | 0.192  | 0.069  | 0.033  | 0.041  | 0.305  | 0.295  | 0.262  | 0.088  | -0.051  | 0.119  | 0.089  |   | 1 |
| JW3804 | b3828 | metR             | 1  | -0.044 | -0.165 | 0.051  | 0.017  | -0.070 | 0.030  | -0.061 | -0.041 | -0.044 | -0.247 | -0.233 | 0.098  | -0.016 | -0.042 | -0.052 | 0.021  | -0.040 | -0.009 | 0.069  | -0.148  | -0.053 | -0.089 |   | 1 |
| JW3805 | b3829 | metE             | 1  | 0.017  | -0.043 | 0.115  | 0.031  | -0.094 | -0.044 | 0.180  | -0.074 | 0.014  | 0.097  | 0.040  | -0.131 | 0.062  | 0.041  | 0.046  | 0.041  | 0.049  | -0.033 | 0.107  | -0.193  | 0.074  | 0.073  |   | 1 |
| JW3806 | b3830 | ysgA             | 15 | 0.060  | -0.115 | 0.010  | 0.001  | 0.052  | 0.057  | -0.111 | 0.043  | 0.004  | -0.185 | -0.180 | 0.141  | -0.063 | -0.070 | -0.114 | -0.131 | -0.031 | -0.045 | 0.040  | -0.010  | -0.003 | -0.008 |   | 1 |
| JW3808 | b3831 | udp              | 8  | 0.183  | 0.131  | 0.194  | 0.186  | 0.236  | 0.068  | 0.186  | 0.351  | 0.205  | 0.055  | 0.054  | 0.224  | 0.131  | 0.225  | 0.150  | 0.360  | 0.420  | 0.433  | 0.250  | 0.089   | 0.264  | 0.252  |   | 1 |
| JW3809 | b3832 | yigN             | 15 | -0.120 | 0.069  | 0.130  | 0.030  | -0.016 | -0.089 | 0.059  | -0.164 | 0.148  | 0.001  | 0.090  | 0.247  | 0.054  | 0.063  | 0.173  | -0.068 | -0.089 | 0.086  | 0.193  | 0.028   | 0.167  | 0.196  |   | 1 |
| JW3810 | b3833 | ubiE             | 2  | 0.063  | 0.106  | 0.223  | 0.238  | 0.220  | -0.082 | 0.050  | 0.310  | 0.288  | 0.070  | 0.070  | 0.280  | 0.147  | 0.179  | 0.218  | 0.397  | 0.435  | 0.455  | 0.164  | 0.120   | 0.275  | 0.224  |   | 1 |
| JW3811 | b3834 | yigP             | 15 | 0.109  | 0.113  | 0.211  | 0.268  | 0.230  | 0.037  | 0.052  | 0.286  | 0.165  | 0.002  | 0.066  | 0.212  | 0.189  | 0.163  | 0.151  | 0.297  | 0.303  | 0.310  | 0.191  | 0.044   | 0.208  | 0.191  |   | 1 |
| JW3812 | b3835 | aarF             | 2  | 0.000  | 0.081  | 0.174  | 0.155  | -0.001 | 0.103  | 0.156  | 0.151  | 0.100  | 0.078  | 0.148  | 0.176  | 0.230  | 0.371  | 0.247  | 0.317  | 0.263  | 0.279  | 0.094  | Invalid | 0.113  | 0.214  |   | 1 |
| JW3813 | b3836 | (yigT)           | 15 | 0.323  | 0.156  | 0.261  | 0.234  | 0.308  | 0.056  | 0.199  | 0.275  | 0.306  | -0.024 | 0.124  | 0.047  | 0.145  | 0.197  | 0.177  | 0.385  | 0.338  | 0.289  | 0.168  | 0.064   | 0.200  | 0.184  |   | 1 |
| JW3814 | b3838 | yigT             | 15 | 0.193  | 0.188  | 0.332  | 0.210  | 0.199  | 0.034  | 0.173  | 0.212  | 0.245  | 0.022  | 0.066  | -0.065 | 0.122  | 0.140  | 0.197  | 0.357  | 0.252  | 0.342  | 0.269  | 0.068   | 0.279  | 0.207  |   | 1 |
| JW3815 | b3839 | tatC             | 12 | -0.167 | -0.147 | 0.026  | 0.094  | 0.123  | -0.096 | -0.026 | 0.307  | 0.145  | 0.008  | 0.035  | 0.361  | 0.009  | 0.048  | 0.184  | 0.203  | 0.181  | 0.287  | 0.166  | 0.040   | 0.199  | 0.252  |   | 1 |
| JW3816 | b3840 | tatD / mttC/yigW | 8  | -0.015 | -0.095 | -0.048 | -0.049 | -0.007 | -0.026 | -0.078 | 0.080  | 0.027  | -0.110 | -0.061 | 0.151  | -0.167 | -0.098 | -0.100 | 0.011  | 0.084  | 0.129  | 0.057  | -0.224  | -0.023 | 0.120  |   | 1 |
| JW3817 | b3841 | (yigW)           | 15 | 0.212  | -0.065 | -0.176 | 0.007  | -0.001 | -0.007 | -0.151 | 0.073  | 0.083  | -0.050 | -0.011 | 0.173  | -0.113 | -0.104 | -0.122 | 0.066  | 0.234  | 0.134  | -0.105 | -0.310  | 0.052  | 0.135  |   | 1 |
| JW3818 | b3842 | rfaH             | 3  | -0.019 | -0     |        |        |        |        |        |        |        |        |        |        |        |        |        |        |        |        |        |         |        |        |   |   |

|        |       |      |    |        |        |        |        |        |        |        |        |        |        |        |        |        |        |        |        |        |        |        |         |        |         |   |
|--------|-------|------|----|--------|--------|--------|--------|--------|--------|--------|--------|--------|--------|--------|--------|--------|--------|--------|--------|--------|--------|--------|---------|--------|---------|---|
| JW3862 | b3891 | fdhE | 6  | 0.122  | -0.131 | 0.034  | -0.029 | -0.046 | 0.094  | -0.025 | 0.054  | -0.040 | 0.013  | 0.076  | 0.068  | -0.153 | -0.146 | -0.172 | -0.017 | 0.024  | -0.032 | 0.066  | -0.423  | -0.228 | -0.269  |   |
| JW3863 | b3892 | fdol | 6  | 0.114  | 0.181  | 0.222  | 0.304  | 0.309  | 0.067  | 0.217  | 0.283  | 0.328  | 0.098  | 0.073  | 0.064  | 0.167  | 0.115  | 0.187  | 0.470  | 0.351  | 0.415  | 0.212  | 0.094   | 0.232  | 0.222   | 1 |
| JW3864 | b3893 | fdoH | 6  | -0.265 | 0.088  | 0.354  | 0.432  | 0.186  | -0.006 | 0.019  | 0.291  | 0.163  | 0.091  | 0.124  | 0.266  | 0.028  | -0.061 | 0.106  | 0.237  | 0.179  | 0.229  | 0.242  | 0.210   | 0.227  | 0.120   | 1 |
| JW3865 | b3894 | fdoG | 6  | 0.227  | 0.131  | 0.364  | 0.469  | 0.314  | 0.126  | 0.053  | 0.196  | -0.057 | 0.018  | 0.105  | 0.214  | 0.080  | 0.009  | 0.095  | 0.170  | 0.367  | 0.131  | 0.272  | 0.083   | 0.266  | 0.099   | 1 |
| JW3866 | b3895 | fdhD | 6  | 0.175  | 0.086  | 0.243  | 0.160  | -0.035 | 0.009  | 0.165  | -0.076 | 0.054  | -0.087 | 0.101  | -0.084 | 0.062  | 0.008  | 0.130  | -0.192 | -0.123 | -0.249 | 0.205  | 0.068   | -0.047 | 0.208   | 1 |
| JW3867 | b3896 | yiiG | 15 | -0.556 | -0.139 | -0.118 | -1.000 | -5.642 | -0.055 | -0.086 | -1.245 | -4.823 | 0.065  | 0.116  | 0.274  | -0.080 | -4.814 | -4.289 | -1.204 | -0.850 | -1.204 | -0.216 | -5.521  | -0.144 | -0.310  | 1 |
| JW3868 | b3897 | frvR | 11 | -0.226 | -0.101 | 0.045  | 0.082  | -0.094 | 0.079  | -0.057 | -5.047 | -0.045 | -0.025 | 0.023  | 0.192  | -4.895 | 0.023  | -0.005 | -5.096 | -4.622 | -5.013 | 0.007  | -1.838  | -0.077 | -0.067  | 1 |
| JW3869 | b3898 | frvX | 15 | -0.303 | -0.374 | -0.121 | 0.074  | 0.059  | 0.133  | -0.136 | -5.872 | 0.016  | 0.035  | 0.097  | 0.243  | -5.829 | -0.171 | -1.159 | -5.760 | -5.773 | -5.983 | -0.150 | Invalid | -0.147 | Invalid | 1 |
| JW3870 | b3899 | frvB | 11 | 0.016  | -0.194 | 0.003  | 0.048  | -1.011 | 0.170  | -0.034 | -5.174 | -0.087 | 0.021  | 0.050  | 0.130  | -5.763 | 0.113  | 0.116  | -5.223 | -4.968 | -5.137 | 0.028  | 0.061   | 0.003  | 0.161   | 1 |
| JW3871 | b3900 | frvA | 15 | 0.146  | -0.137 | 0.272  | 0.100  | -0.529 | 0.199  | 0.117  | -4.047 | -0.444 | -0.032 | 0.124  | 0.195  | -4.285 | 0.294  | 0.166  | -4.297 | -4.475 | -4.453 | 0.197  | -0.069  | 0.203  | -0.069  | 1 |
| JW3872 | b3901 | yiiL | 15 | -0.381 | -0.708 | -0.350 | -0.268 | -0.502 | 0.063  | -0.197 | -0.589 | -0.373 | 0.132  | 0.118  | 0.109  | -3.093 | -0.140 | -0.265 | -0.203 | -0.330 | -0.345 | -0.428 | -0.006  | -0.264 | -0.279  | 1 |
| JW3873 | b3902 | rhaD | 6  | -0.286 | -0.380 | -0.189 | 0.011  | -0.178 | 0.003  | -0.187 | 0.100  | -0.065 | -0.068 | 0.132  | 0.027  | -0.093 | -0.122 | -0.095 | 0.205  | 0.031  | 0.158  | -0.224 | -0.221  | -0.045 | -0.216  | 1 |
| JW3874 | b3903 | rhaA | 6  | -0.328 | -0.182 | 0.086  | 0.082  | -0.146 | 0.017  | -0.072 | -0.088 | -0.122 | -0.170 | -0.043 | 0.243  | -0.162 | -0.078 | -0.089 | -0.134 | -0.022 | -0.232 | 0.002  | -0.107  | -0.204 | -0.148  | 1 |
| JW3875 | b3904 | rhaB | 6  | 0.078  | -0.214 | -0.068 | -0.005 | -0.139 | 0.017  | -0.140 | 0.016  | -0.095 | -0.071 | 0.038  | 0.252  | -0.156 | -0.030 | -0.106 | 0.062  | 0.128  | -0.046 | -0.165 | -0.180  | -0.188 | -0.149  | 1 |
| JW3876 | b3905 | rhaS | 6  | 0.181  | 0.120  | 0.189  | 0.238  | 0.188  | 0.081  | 0.088  | -0.062 | 0.197  | -0.015 | 0.052  | 0.173  | 0.085  | 0.143  | 0.101  | 0.160  | 0.138  | 0.076  | 0.179  | 0.027   | 0.132  | 0.172   | 1 |
| JW3877 | b3906 | rhaR | 6  | 0.047  | -0.019 | 0.044  | 0.217  | 0.138  | -0.031 | 0.017  | 0.188  | 0.165  | 0.120  | 0.097  | 0.241  | 0.094  | 0.116  | 0.113  | 0.276  | 0.230  | 0.258  | 0.032  | -0.023  | 0.082  | 0.038   | 1 |
| JW3878 | b3907 | rhaT | 11 | 0.003  | 0.024  | -0.050 | 0.095  | 0.037  | 0.058  | 0.058  | 0.139  | 0.113  | 0.041  | 0.065  | 0.177  | 0.051  | 0.168  | 0.129  | 0.212  | 0.132  | 0.123  | -0.092 | 0.026   | 0.141  | 0.126   | 1 |
| JW3879 | b3908 | sodA | 4  | -0.046 | 0.064  | 0.073  | 0.146  | 0.037  | 0.019  | 0.189  | 0.074  | 0.140  | -0.022 | 0.053  | 0.061  | 0.040  | 0.163  | 0.109  | 0.140  | 0.089  | 0.067  | 0.073  | 0.014   | 0.181  | 0.136   | 1 |
| JW3880 | b3909 | kdgT | 11 | -0.049 | 0.079  | 0.154  | 0.240  | 0.075  | 0.114  | 0.134  | 0.159  | 0.117  | 0.077  | 0.118  | 0.143  | 0.104  | -0.094 | 0.127  | 0.265  | 0.181  | 0.149  | 0.050  | 0.057   | 0.128  | 0.068   | 1 |
| JW3882 | b3911 | cpxA | 9  | 0.155  | 0.075  | 0.201  | 0.181  | 0.143  | 0.131  | 0.127  | 0.239  | 0.140  | 0.026  | 0.073  | 0.150  | 0.129  | 0.218  | 0.116  | 0.200  | 0.175  | 0.147  | 0.102  | 0.084   | 0.187  | 0.109   | 1 |
| JW3883 | b3912 | cpxR | 13 | 0.039  | 0.098  | 0.099  | 0.045  | -0.128 | 0.034  | 0.132  | 0.076  | -0.039 | 0.113  | 0.070  | 0.083  | 0.051  | 0.148  | 0.112  | 0.063  | 0.015  | -0.009 | 0.024  | 0.125   | 0.303  | 0.204   | 1 |
| JW3885 | b3914 | cpxP | 9  | -0.069 | 0.185  | 0.315  | 0.148  | 0.069  | -0.119 | 0.297  | 0.201  | 0.232  | 0.076  | 0.037  | 0.151  | 0.242  | 0.211  | 0.195  | 0.474  | 0.269  | 0.327  | 0.219  | 0.129   | 0.444  | 0.250   | 1 |
| JW3886 | b3915 | yiiP | 15 | 0.004  | 0.137  | 0.222  | 0.153  | 0.131  | -0.038 | 0.051  | 0.249  | 0.323  | -0.015 | 0.203  | -0.011 | 0.128  | 0.123  | 0.109  | 0.364  | 0.254  | 0.296  | 0.072  | -0.038  | 0.133  | 0.159   | 1 |
| JW3887 | b3916 | prfA | 6  | -0.498 | -0.063 | -0.045 | 0.188  | 0.016  | -0.069 | -0.194 | 0.182  | 0.158  | 0.098  | 0.149  | 0.001  | -0.164 | -0.112 | -0.137 | 0.228  | -0.044 | 0.234  | -0.165 | -0.031  | -0.055 | -0.101  | 1 |
| JW3888 | b3917 | sbp  | 11 | -0.059 | 0.037  | 0.120  | 0.299  | 0.134  | 0.075  | 0.022  | 0.224  | 0.170  | 0.031  | 0.174  | 0.288  | 0.071  | 0.151  | 0.063  | 0.236  | 0.184  | 0.278  | -0.004 | -0.117  | 0.059  | 0.019   | 1 |
| JW3889 | b3918 | cdh  | 7  | 0.143  | -0.090 | 0.147  | 0.005  | -0.433 | -0.030 | 0.204  | -0.406 | -0.170 | 0.107  | 0.107  | 0.030  | -0.106 | -0.031 | -0.076 | -0.258 | -0.189 | -0.393 | 0.094  | -0.167  | 0.198  | 0.121   | 1 |
| JW3890 | b3919 | tpiA | 6  | -0.086 | 0.039  | 0.000  | 0.062  | -0.019 | -0.098 | -0.143 | 0.378  | 0.206  | 0.068  | 0.254  | -0.154 | 0.001  | -0.030 | -0.202 | 0.358  | 0.165  | 0.194  | -0.046 | -0.267  | -0.177 | -0.012  | 1 |
| JW3891 | b3920 | yiiQ | 15 | -0.083 | -0.078 | -0.085 | 0.074  | 0.030  | -0.133 | -0.064 | 0.089  | 0.114  | -0.030 | 0.025  | 0.233  | -0.052 | 0.009  | 0.016  | 0.012  | 0.036  | 0.016  | 0.024  | -0.111  | 0.071  | 0.088   | 1 |
| JW3892 | b3921 | yiiR | 15 | -0.116 | 0.022  | -0.185 | -0.079 | -0.052 | 0.048  | 0.034  | 0.067  | 0.112  | 0.047  | 0.030  | 0.246  | -0.052 | 0.190  | 0.056  | 0.108  | 0.121  | -0.135 | -0.224 | 0.089   | 0.328  | 0.236   | 1 |
| JW3893 | b3922 | yiiS | 15 | 0.133  | -0.009 | -0.052 | -0.082 | -0.040 | 0.063  | 0.025  | 0.134  | 0.038  | -0.111 | 0.040  | 0.230  | 0.122  | 0.159  | 0.026  | -0.043 | 0.113  | 0.014  | -0.101 | -0.014  | 0.005  | 0.104   | 1 |
| JW3894 | b3923 | yiiT | 14 | -0.110 | 0.113  | 0.157  | 0.050  | 0.048  | -0.031 | 0.242  | -0.006 | 0.170  | 0.166  | 0.067  | 0.184  | 0.063  | 0.237  | 0.101  | 0.261  | 0.242  | 0.361  | 0.085  | 0.050   | 0.079  | 0.247   | 1 |
| JW3895 | b3924 | fpr  | 6  | -0.254 | -0.071 | -0.213 | -0.241 | -0.616 | -0.026 | 0.042  | -0.387 | -0.322 | 0.082  | 0.036  | 0.162  | -0.019 | -0.079 | -0.158 | -0.277 | -0.324 | -0.721 | -0.074 | -0.145  | -0.169 | 0.009   | 1 |
| JW3896 | b3925 | glpX | 15 | -0.118 | 0.111  | 0.296  | 0.125  | -0.153 | -0.046 | 0.117  | -0.054 | -0.039 | 0.010  | 0.019  | 0.212  | 0.072  | 0.159  | 0.173  | -0.133 | -0.201 | -0.047 | 0.230  | 0.131   | 0.177  | 0.043   | 1 |
| JW3897 | b3926 | glpK | 5  | 0.018  | 0.059  | 0.145  | 0.136  | -0.160 | 0.001  | 0.108  | -0.057 | -0.065 | 0.072  | 0.089  | 0.258  | 0.070  | 0.234  | 0.136  | -0.026 | -0.067 | -0.105 | 0.028  | 0.050   | -0.142 | 0.055   | 1 |
| JW3898 | b3927 | glpF | 11 | 0.057  | 0.088  | 0.204  | 0.273  | 0.152  | -0.067 | 0.110  | 0.198  | 0.232  | 0.066  | 0.065  | 0.257  | 0.133  | 0.160  | 0.144  | 0.321  | 0.281  | 0.274  | 0.133  | -0.020  | 0.048  | 0.074   | 1 |
| JW3899 | b3928 | yiiU | 15 | 0.137  | 0.123  | 0.194  | 0.260  | 0.264  | 0.046  | 0.217  | 0.411  | 0.363  | 0.010  | 0.082  | 0.051  | 0.123  | 0.222  | 0.185  | 0.452  | 0.499  | 0.373  | 0.066  | 0.145   | 0.246  | 0.189   | 1 |
| JW3900 | b3929 | menG | 2  | 0.271  | 0.096  | 0.164  | 0.199  | 0.194  | 0.028  | 0.165  | 0.240  | 0.159  | 0.035  | 0.023  | 0.225  | 0.048  | 0.177  | 0.078  | 0.185  | 0.192  | 0.171  | 0.233  | 0.002   | 0.130  | 0.131   | 1 |
| JW3901 | b3930 | menA | 2  | 0.015  | 0.172  | 0.193  | 0.203  | 0.068  | 0.013  | 0.203  | 0.191  | 0.076  | 0.065  | 0.044  | 0.171  | 0.153  | 0.164  | 0.096  | 0.119  | 0.110  | 0.145  | 0.245  | 0.028   | 0.140  | 0.137   | 1 |
| JW3902 | b3931 | hslU | 14 | 0.139  | 0.159  | 0.247  | 0.219  | 0.275  | 0.049  | 0.236  | 0.267  | 0.279  | 0.057  | 0.051  | 0.022  | 0.149  | 0.160  | 0.098  | 0.321  | 0.370  | 0.328  | 0.222  | 0.049   | 0.188  | 0.240   | 1 |
| JW3903 | b3932 | hslV | 14 | 0.147  | 0.175  | 0.142  | 0.126  | 0.098  | -0.075 | 0.144  | 0.311  | 0.324  | 0.080  | 0.055  | 0.030  | 0.093  | 0.026  | 0.061  | 0.387  | 0.376  | 0.280  | 0.189  | 0.091   | 0.123  | 0.212   | 1 |
| JW3904 | b3933 | ftsN | 4  | -0.075 | -0.048 | 0.088  | 0.057  | -0.016 | -0.145 | -0.035 | 0.020  | 0.154  | 0.055  | 0.054  | 0.227  | -0.066 | -0.011 | 0.019  | 0.092  | 0.295  | 0.119  | 0.096  | -0.011  | 0.088  | 0.004   | 1 |
| JW3905 | b3934 | cytR | 9  | 0.040  | -0.060 | 0.087  | 0.170  | 0.084  | -0.009 | -0.033 | 0.172  | 0.165  | 0.090  | 0.055  | 0.245  | 0.015  | 0.140  | 0.071  | 0.223  | 0.338  | 0.278  | -0.002 | -0.050  | 0.071  | -0.010  | 1 |
| JW3906 | b3935 | priA | 10 | 0.082  | -0.317 | -0.016 | -0.072 | -0.157 | 0.059  | -0.144 | -0.014 | -0.204 | -0.086 | -0.030 | 0.006  | -0.182 | -0.124 | -0.202 | -0.114 | -0.096 | -0.135 | -0.048 | -0.253  | -0.258 | -0.362  | 1 |
| JW3907 | b3936 | rpmE | 12 | 0.267  | 0.111  | 0.354  | 0.347  | 0.195  | -0.012 | 0.301  | 0.176  | 0.297  | 0.184  | 0.133  | 0.267  | 0.275  | 0.317  | 0.211  | 0.479  | 0.455  | 0.378  | 0.294  | 0.067   | 0.255  | 0.192   | 1 |
| JW3908 | b3937 | yiiX | 15 | -0.084 | -0.425 | -0.246 | -0.094 | -0.217 | 0.002  | -0.072 | -0.190 | -0.026 | -0.009 | 0.149  | -0.175 | 0.106  | 0.032  | 0.081  | -0.155 | -0.157 | -0.245 | -0.197 | -0.590  | 0.085  | -0.070  | 1 |
| JW3909 | b3938 | metJ | 1  | -0.104 | -0.020 | 0.031  | -0.009 | 0.011  | -0.047 | 0.047  | -0.067 | 0.111  | -0.035 | -0.036 | 0.268  | 0.025  | 0.104  | 0.130  | -0.066 | 0.033  | 0.082  | -0.068 | -0.018  | 0.164  | 0.110   | 1 |
| JW3910 | b3939 | metB | 1  | 0.094  | 0.009  | -0.056 | -0.056 | 0.061  | -0.030 | -0.032 | 0.002  | 0.029  | -0.092 | -0.069 | 0.062  | -0.056 | 0.063  | 0.023  | 0.037  | 0.119  | 0.017  | -0.0   |         |        |         |   |

|          |        |        |    |        |        |        |        |        |        |        |        |        |        |        |        |        |        |        |        |        |        |        |        |        |        |
|----------|--------|--------|----|--------|--------|--------|--------|--------|--------|--------|--------|--------|--------|--------|--------|--------|--------|--------|--------|--------|--------|--------|--------|--------|--------|
| JW3953   | b3990  | thiH   | 2  | 0.015  | 0.025  | 0.105  | 0.064  | 0.020  | 0.186  | 0.071  | -0.228 | -0.044 | -0.193 | -0.072 | 0.016  | 0.034  | 0.143  | -0.003 | 0.113  | -0.211 | -0.424 | -0.017 | 0.066  | -0.023 | 0.065  |
| JW3954   | b3991  | thiG   | 2  | -0.023 | 0.006  | 0.177  | 0.073  | -0.125 | 0.107  | 0.088  | -0.049 | -0.118 | -0.257 | -0.251 | -0.048 | -0.112 | -0.136 | -0.177 | 0.444  | 0.146  | -0.083 | 0.163  | -0.171 | -0.176 | -0.141 |
| JW3955   |        | (thiS) | 15 | 0.040  | 0.239  | 0.398  | -0.050 | -0.405 | -0.015 | 0.348  | -0.397 | -0.169 | 0.152  | 0.015  | -0.087 | 0.002  | -0.025 | 0.076  | 0.275  | 0.001  | -0.213 | 0.346  | 0.005  | 0.206  | 0.232  |
| JW3956   | b3992  | thiF   | 2  | -0.266 | 0.025  | 0.207  | 0.298  | -0.013 | 0.026  | -0.006 | 0.103  | -0.056 | 0.063  | 0.088  | 0.217  | -0.039 | -0.018 | -0.048 | 0.473  | 0.063  | 0.157  | 0.150  | -0.046 | 0.123  | 0.053  |
| JW3957   | b3993  | thiE   | 2  | 0.115  | 0.096  | 0.326  | 0.250  | -0.119 | 0.001  | 0.013  | -0.198 | -0.151 | -0.002 | 0.023  | 0.158  | 0.094  | 0.073  | -0.027 | 0.555  | 0.120  | 0.015  | 0.243  | 0.011  | 0.120  | -0.025 |
| JW3958   | b3994  | thiC   | 2  | 0.169  | 0.048  | 0.241  | 0.225  | -0.062 | 0.200  | 0.035  | -0.128 | -0.144 | -0.125 | -0.028 | 0.042  | 0.172  | 0.268  | 0.097  | 0.633  | -0.072 | -0.250 | 0.096  | -0.173 | -0.145 | -0.074 |
| JW3959   | b3995  | rsd    | 13 | 0.175  | 0.195  | 0.388  | 0.342  | 0.227  | 0.223  | 0.274  | 0.301  | 0.203  | 0.050  | 0.107  | 0.041  | 0.195  | 0.286  | 0.162  | 0.826  | 0.244  | 0.217  | 0.303  | 0.045  | 0.123  | 0.050  |
| JW3960   | b3996  | yjaD   | 15 | 0.020  | 0.017  | 0.125  | 0.220  | 0.037  | 0.090  | 0.041  | 0.072  | 0.163  | 0.013  | 0.015  | -0.004 | -0.007 | 0.055  | 0.043  | 0.672  | 0.030  | 0.075  | 0.025  | 0.033  | -0.116 | 0.039  |
| JW3961   | b3997  | hemE   | 2  | 0.164  | -0.030 | 0.243  | 0.234  | 0.244  | 0.081  | 0.040  | 0.034  | 0.097  | -0.034 | 0.014  | 0.160  | 0.027  | 0.114  | 0.094  | 0.590  | 0.138  | 0.145  | 0.220  | -0.017 | 0.073  | 0.040  |
| JW3962   | b3998  | nfi    | 13 | -0.020 | -0.046 | 0.183  | 0.114  | -0.016 | 0.155  | 0.110  | -0.094 | -0.054 | -0.062 | -0.038 | -0.170 | -0.002 | 0.072  | -0.003 | 0.384  | -0.090 | 0.038  | 0.122  | 0.013  | -0.165 | -0.035 |
| JW3963   | b3999  | yjaG   | 15 | -0.104 | 0.025  | 0.200  | 0.205  | -0.062 | 0.053  | -0.038 | -0.155 | -0.048 | -0.049 | 0.072  | 0.210  | 0.053  | 0.099  | 0.055  | 0.355  | -0.081 | -0.159 | 0.118  | 0.108  | -0.013 | 0.025  |
| JW3964   | b4000  | hspA   | 9  | -0.271 | -0.200 | -0.087 | 0.267  | 0.115  | -0.165 | 0.314  | 0.245  | 0.195  | 0.139  | 0.074  | -0.056 | -0.113 | -0.141 | 0.665  | 0.108  | 0.447  | -0.245 | -0.133 | 0.042  | -0.195 | 0.040  |
| JW3965   | b4001  | yjaH   | 15 | 0.173  | -0.108 | 0.139  | 0.161  | 0.094  | 0.065  | -0.132 | 0.216  | -0.006 | -0.139 | -0.092 | 0.009  | -0.106 | -0.080 | -0.162 | 0.730  | 0.122  | -0.186 | 0.008  | -0.211 | -0.029 | 0.016  |
| JW3967   | b4003  | hydH   | 6  | -0.833 | -0.706 | -0.556 | -0.449 | -0.614 | 0.212  | -0.591 | -0.655 | -0.667 | -0.901 | -0.812 | -0.782 | -0.625 | -0.541 | -0.632 | -0.198 | -0.621 | -0.198 | -0.637 | -0.711 | -0.689 | -0.710 |
| JW3968   | b4004  | hydG   | 6  | -0.250 | -0.229 | 0.232  | 0.108  | -0.148 | 0.152  | 0.127  | -0.185 | -0.208 | -0.114 | -0.114 | -0.102 | 0.029  | 0.069  | 0.015  | 0.250  | -0.172 | -0.236 | 0.119  | -0.042 | -0.312 | -0.289 |
| JW3969   | b4005  | purD   | 8  | -0.278 | -0.060 | 0.220  | 0.037  | -0.362 | 0.139  | 0.112  | -0.312 | -0.298 | -0.263 | -0.128 | -0.039 | 0.126  | 0.160  | 0.152  | -0.174 | -0.283 | -0.270 | 0.066  | -0.156 | -0.122 | -0.382 |
| JW3970   | b4006  | purH   | 8  | 0.032  | -0.097 | 0.062  | 0.078  | -0.048 | 0.154  | 0.024  | -0.107 | -0.160 | -0.023 | 0.010  | 0.053  | -0.006 | -0.056 | -0.101 | 0.562  | -0.059 | -0.030 | 0.086  | -0.231 | -0.051 | -0.139 |
| JW3971   | b4011  | yjaA   | 15 | -1.116 | -3.607 | -4.141 | -0.517 | 0.176  | 0.176  | -3.285 | 0.229  | 0.160  | 0.042  | 0.059  | -3.288 | -3.927 | -3.472 | -3.417 | 0.088  | -3.689 | 0.067  | -3.535 | -3.912 | -3.691 | -3.835 |
| JW3972   | b4012  | yjaB   | 15 | -0.663 | -0.655 | -0.648 | -0.148 | 0.063  | 0.281  | -0.473 | 0.025  | -0.103 | -0.041 | 0.039  | -0.327 | -0.349 | -0.173 | -0.299 | 0.040  | -0.382 | -0.150 | -0.716 | -0.634 | -0.444 | -0.342 |
| JW3973   | b4013  | metA   | 1  | -0.178 | -0.058 | 0.032  | 0.075  | 0.054  | 0.119  | 0.039  | 0.062  | -0.005 | 0.035  | 0.040  | 0.069  | -0.064 | -0.079 | -0.112 | -0.012 | -0.043 | 0.001  | -0.029 | -0.166 | -0.136 | 0.027  |
| JW3974   | b4014  | aceB   | 5  | 0.026  | 0.110  | 0.097  | 0.135  | 0.294  | 0.116  | 0.207  | 0.225  | 0.151  | 0.107  | 0.124  | -0.038 | 0.025  | 0.057  | 0.057  | 0.196  | 0.235  | 0.156  | -0.006 | 0.065  | 0.214  | 0.148  |
| JW3975   | b4015  | aceA   | 5  | -0.247 | -0.014 | 0.179  | 0.276  | 0.009  | 0.239  | 0.025  | 0.129  | -0.107 | 0.134  | 0.095  | 0.219  | 0.150  | 0.195  | 0.076  | -0.014 | 0.019  | -0.018 | -0.009 | 0.104  | 0.069  | 0.097  |
| JW3976   | b4016  | aceK   | 5  | -0.144 | -0.079 | 0.121  | 0.049  | -0.216 | 0.269  | 0.010  | -0.064 | -0.300 | 0.015  | 0.097  | 0.019  | 0.026  | 0.123  | -0.001 | -0.187 | -0.175 | -0.471 | -0.054 | -0.005 | 0.033  | -5.572 |
| JW3977   | b4017  | arp    | 9  | -0.272 | -0.808 | -0.857 | -1.878 | -7.889 | -0.112 | -0.723 | -7.693 | -6.562 | 0.082  | 0.080  | -0.952 | -0.037 | -1.182 | -1.276 | -7.487 | -6.302 | -7.058 | -0.904 | -0.052 | 0.049  | -1.300 |
| JW3978   | b4018  | iclR   | 5  | -0.021 | 0.127  | 0.074  | 0.074  | -0.176 | -0.081 | 0.100  | 0.058  | 0.044  | 0.037  | 0.153  | -0.059 | -0.009 | 0.073  | 0.124  | 0.039  | -0.086 | -0.163 | -0.047 | -0.054 | 0.272  | 0.043  |
| JW3979   | b4019  | metH   | 1  | -0.195 | -0.073 | 0.202  | 0.048  | 0.002  | -0.017 | -0.003 | -0.142 | 0.042  | -0.010 | 0.013  | 0.118  | -0.010 | -0.034 | 0.003  | -0.172 | 0.105  | -0.038 | 0.223  | -0.023 | 0.156  | 0.150  |
| JW3980   | b4020  | yjbB   | 15 | -0.035 | -0.087 | 0.140  | -0.027 | -0.171 | 0.124  | 0.016  | -0.235 | -0.211 | -0.062 | 0.006  | 0.063  | -0.145 | 0.024  | -0.068 | -0.316 | -0.136 | -0.338 | -0.013 | -0.010 | -0.048 | -0.051 |
| JW3981   | b4021  | pepE   | 14 | -0.021 | -0.050 | 0.180  | 0.040  | 0.047  | 0.156  | 0.105  | 0.003  | -0.017 | 0.059  | 0.048  | 0.153  | 0.011  | 0.051  | -0.007 | 0.015  | -0.055 | 0.019  | 0.117  | -0.006 | -0.043 | 0.009  |
| JW3982   | b4022  | yjbC   | 15 | -0.213 | -0.371 | -0.531 | -0.404 | -0.243 | 0.154  | -0.325 | -0.289 | -0.236 | 0.002  | 0.078  | -0.275 | -0.310 | -0.165 | -0.279 | -0.280 | -0.218 | -0.326 | -0.474 | -0.266 | -0.318 | -0.317 |
| JW3983   | b4023  | yjbD   | 15 | -0.020 | 0.005  | -1.650 | -0.392 | 0.055  | 0.134  | -1.157 | 0.134  | 0.102  | 0.059  | 0.090  | 0.244  | 0.005  | 0.076  | 0.007  | 0.133  | 0.164  | 0.102  | -1.487 | 0.001  | 0.070  | -0.040 |
| JW3984   | b4024  | lysC   | 1  | 0.149  | 0.053  | 0.092  | 0.139  | 0.157  | 0.200  | -0.056 | 0.172  | 0.093  | 0.030  | 0.109  | 0.087  | -0.061 | 0.062  | -0.042 | 0.136  | 0.183  | 0.146  | -0.059 | -0.054 | -0.001 | -0.068 |
| JW3985   | b4025  | pgi    | 6  | -0.056 | -0.132 | 0.051  | 0.019  | -0.081 | 0.071  | 0.109  | -0.107 | -0.041 | 0.095  | 0.114  | 0.141  | -0.072 | 0.071  | -0.087 | 0.093  | 0.088  | -0.002 | -0.089 | -0.055 | -0.103 | -0.049 |
| JW3986   | b4026  | 633#6  | 15 | 0.386  | 0.185  | 0.480  | 0.399  | 0.353  | 0.025  | 0.172  | 0.432  | 0.372  | -0.041 | -0.037 | -0.097 | 0.126  | 0.106  | 0.099  | 0.444  | 0.675  | 0.437  | 0.319  | -0.175 | 0.369  | 0.234  |
| JW3987   | b4027  | yjbF   | 15 | -0.019 | -0.056 | -0.167 | -0.163 | -0.206 | -0.121 | -0.168 | -0.294 | 0.030  | -0.020 | 0.065  | -0.003 | -0.145 | -0.148 | -0.077 | -0.041 | -0.008 | -0.087 | -0.232 | -0.061 | -0.056 | -0.100 |
| JW3988   | b4028  | yjbG   | 15 | -0.203 | -0.157 | -0.326 | -0.295 | -0.264 | -0.016 | -0.335 | -0.288 | -0.045 | -0.003 | -0.065 | 0.286  | -0.199 | -0.082 | -0.051 | -0.300 | -0.072 | -0.148 | -0.292 | -0.006 | -0.154 | 0.059  |
| JW3989   | b4029  | yjbH   | 15 | 0.108  | -0.091 | 0.166  | 0.140  | 0.196  | 0.020  | 0.015  | 0.065  | 0.175  | 0.012  | 0.006  | 0.167  | 0.008  | 0.090  | 0.050  | -0.045 | 0.213  | 0.267  | 0.145  | -0.027 | -0.106 | -0.019 |
| JW3989.5 | 633#10 |        | 15 | -0.200 | 0.062  | 0.037  | 0.025  | 0.190  | 0.069  | 0.181  | 0.247  | 0.252  | 0.066  | -0.180 | -0.006 | -0.013 | 0.155  | 0.097  | 0.264  | 0.170  | 0.407  | -0.150 | 0.033  | 0.187  | 0.204  |
| JW3990   | b4030  | yjaA   | 15 | 0.237  | 0.180  | 0.130  | 0.029  | 0.292  | -0.075 | 0.130  | 0.177  | 0.304  | -0.033 | 0.056  | -0.126 | -0.054 | 0.040  | 0.084  | 0.357  | 0.332  | 0.233  | -0.061 | 0.139  | 0.176  | 0.197  |
| JW3991   | b4031  | xyIE   | 11 | -0.241 | -0.181 | 0.114  | -0.864 | -3.899 | -0.014 | 0.001  | -3.928 | -3.557 | 0.102  | 0.047  | 0.205  | -0.645 | 0.114  | 0.062  | -3.850 | -3.478 | -3.708 | -0.054 | 0.045  | 0.175  | 0.066  |
| JW3992   | b4032  | malG   | 11 | 0.058  | -0.026 | 0.048  | -0.031 | -0.017 | 0.071  | 0.021  | -0.030 | -0.042 | 0.042  | 0.017  | 0.211  | -2.072 | 0.060  | -0.025 | -0.033 | 0.027  | 0.085  | 0.099  | 0.053  | -0.082 | 0.088  |
| JW3993   | b4033  | malF   | 11 | 0.098  | 0.011  | 0.226  | 0.103  | 0.097  | 0.111  | 0.145  | -0.100 | 0.064  | 0.000  | 0.035  | 0.085  | -7.393 | 0.066  | 0.014  | 0.101  | -0.038 | 0.039  | 0.200  | 0.015  | 0.188  | 0.126  |
| JW3994   | b4034  | malE   | 11 | -0.045 | 0.042  | 0.107  | -0.043 | -0.046 | 0.091  | 0.174  | -0.034 | -0.062 | -0.021 | -0.003 | -0.044 | -6.418 | 0.143  | 0.022  | -0.085 | 0.063  | 0.017  | -0.021 | 0.006  | 0.227  | 0.089  |
| JW3995   | b4035  | malK   | 11 | 0.046  | 0.197  | 0.174  | 0.051  | 0.100  | 0.000  | 0.066  | 0.064  | 0.122  | -0.135 | -0.075 | -0.016 | -4.615 | -0.027 | -0.037 | 0.108  | 0.181  | 0.020  | 0.168  | 0.045  | -0.041 | 0.115  |
| JW3996   | b4036  | lamB   | 11 | -0.316 | -0.097 | -0.278 | -0.059 | -0.094 | -0.034 | -0.257 | -0.018 | 0.072  | -0.097 | -0.117 | 0.110  | -3.585 | 0.060  | 0.012  | 0.038  | 0.162  | 0.142  | -0.328 | -0.004 | 0.087  | 0.072  |
| JW3997   | b4037  | malM   | 6  | -0.111 | 0.082  | 0.035  | -0.053 | -0.210 | 0.036  | -0.028 | -0.133 | -0.099 | -0.056 | -0.059 | 0.324  | -4.253 | 0.257  | 0.156  | -0.091 | -0.017 | -0.221 | -0.159 | 0.002  | -0.019 | 0.071  |
| JW3998   | b4038  | yjbl   | 15 | -0.323 | -0.274 | -0.513 | -1.453 | -5.635 | 0.042  | -0.275 | -5.540 | -4.908 | -0.445 | -0.292 | 0.242  | -1.166 | 0.021  | -0.072 | -5.508 | -5.006 | -5.513 | -0.496 | -0.442 | -0.116 | -0.322 |
| JW3999   | b4039  | ubiC   | 2  | 0.141  | 0.078  | 0.180  | 0.157  | 0.082  | 0.047  | 0.158  | 0.078  | 0.067  | -0.035 | 0.040  | 0.038  | 0.012  | 0.212  | 0.131  | 0.142  | 0.123  | 0.067  | 0.087  | -0.091 | -0.191 | 0.109  |
| JW4000   | b4040  | ubiA   | 2  | 0.135  | -0.001 | 0.065  | 0.097  | 0.049  | -0.012 | 0.136  | 0.048  | 0.148  | -0.030 | -0.013 | -0.057 | 0.048  | 0.099  | 0.085  | 0.091  | 0.120  | 0.025  | -0.022 | 0.040  | 0.     |        |

|        |       |             |    |         |         |         |         |         |         |         |         |         |         |         |         |         |         |         |         |         |         |         |         |         |         |   |
|--------|-------|-------------|----|---------|---------|---------|---------|---------|---------|---------|---------|---------|---------|---------|---------|---------|---------|---------|---------|---------|---------|---------|---------|---------|---------|---|
| JW4042 | b4081 | yjcQ        | 15 | -0.165  | -0.074  | 0.021   | -0.024  | -0.189  | 0.064   | -0.028  | -0.063  | -7.101  | 0.126   | 0.037   | -0.100  | -0.051  | -2.089  | -0.077  | 0.089   | 0.028   | 0.071   | -0.038  | -0.119  | -0.119  | -0.143  | 1 |
| JW4043 | b4082 | yjcR        | 15 | -0.104  | -0.134  | -0.029  | -0.163  | -0.386  | 0.113   | -0.047  | -0.532  | -5.803  | -0.001  | 0.081   | -0.001  | -0.279  | -6.220  | -0.233  | -0.381  | -0.387  | -0.125  | -0.201  | -0.174  | -0.244  | -0.131  | 1 |
| JW4045 | b4084 | alsK        | 14 | -6.102  | -6.191  | 0.182   | 0.078   | -0.035  | -0.012  | 0.039   | 0.084   | -6.729  | 0.099   | 0.029   | 0.211   | -6.343  | -7.766  | -7.038  | 0.201   | 0.313   | 0.303   | 0.205   | -7.743  | -5.809  | Invalid | 1 |
| JW4046 | b4085 | alsE        | 14 | -4.386  | -4.307  | 0.079   | 0.016   | -0.191  | 0.173   | 0.050   | -0.149  | -4.496  | -0.006  | -0.027  | 0.195   | -5.349  | -4.524  | -4.476  | -0.182  | -0.093  | -0.107  | 0.036   | -5.927  | -4.811  | -5.300  | 1 |
| JW4047 | b4086 | alsC        | 11 | -4.257  | -4.467  | 0.197   | 0.168   | 0.106   | 0.277   | 0.114   | 0.065   | -5.665  | 0.099   | 0.052   | 0.182   | -4.509  | -5.549  | -4.559  | 0.034   | 0.064   | 0.062   | 0.102   | -4.984  | -4.689  | -4.494  | 1 |
| JW4048 | b4087 | alsA        | 11 | -5.453  | -5.423  | 0.087   | 0.014   | 0.068   | 0.213   | 0.094   | -0.024  | -6.112  | 0.050   | -0.068  | 0.025   | -5.588  | -5.780  | -5.472  | 0.054   | 0.038   | 0.044   | -0.037  | -6.275  | -5.599  | -5.566  | 1 |
| JW4050 | b4089 | alsR / rpiR | 12 | -6.104  | -5.839  | 0.188   | -0.066  | -0.256  | 0.091   | 0.198   | -0.283  | -5.684  | 0.003   | 0.096   | -0.010  | -6.188  | -6.038  | -5.912  | -0.056  | -0.139  | -0.115  | 0.089   | -7.076  | -6.603  | -6.199  | 1 |
| JW4051 | b4090 | rpiB        | 8  | -3.394  | -1.501  | 0.196   | 0.056   | -0.123  | 0.128   | 0.116   | -0.147  | -4.050  | -0.037  | -0.021  | 0.219   | -1.438  | -3.212  | -3.218  | -0.106  | -0.155  | -0.075  | 0.096   | -4.779  | -3.571  | -1.445  | 1 |
| JW4052 | b4091 | pnhC        | 5  | -0.750  | -0.513  | 0.049   | -0.187  | -0.247  | 0.171   | 0.015   | -0.323  | -4.283  | -0.024  | -0.046  | -0.056  | -0.178  | -1.203  | -1.349  | -0.133  | -0.410  | -0.437  | -0.010  | -5.306  | -0.701  | -0.491  | 1 |
| JW4053 | b4092 | pnhP        | 5  | -0.419  | -0.103  | -0.039  | -0.385  | -0.379  | -0.040  | -0.377  | -0.748  | -1.615  | 0.127   | -0.337  | -0.489  | -0.759  | -0.543  | -0.643  | -0.819  | -0.877  | -0.801  | -0.346  | -1.605  | -0.696  | -0.582  | 1 |
| JW4054 | b4093 | pnhO        | 5  | 0.268   | -0.419  | 0.215   | -0.125  | -0.355  | 0.158   | 0.222   | -0.327  | -4.153  | -0.031  | -0.173  | -0.195  | -0.192  | -0.193  | -0.269  | -0.167  | -0.525  | -0.202  | 0.141   | -5.338  | -0.696  | -0.491  | 1 |
| JW4055 | b4094 | pnhN        | 5  | 0.036   | -0.199  | 0.041   | -0.314  | -0.514  | 0.043   | -0.138  | -0.566  | -4.391  | -0.026  | -0.050  | -0.371  | -0.136  | -0.201  | -0.164  | -0.605  | -0.595  | -0.679  | -0.028  | -5.779  | -0.344  | -0.335  | 1 |
| JW4056 | b4095 | pnhM        | 5  | -0.327  | -0.601  | -0.323  | -0.262  | -0.203  | -0.042  | -0.471  | -0.330  | -5.687  | -0.124  | -0.099  | 0.006   | -0.444  | -0.735  | -0.487  | -0.379  | -0.391  | -0.329  | -0.186  | -6.881  | -0.503  | -0.304  | 1 |
| JW4057 | b4096 | pnhL        | 5  | -0.347  | -0.682  | 0.301   | -0.318  | -0.898  | 0.057   | 0.003   | -0.829  | -4.510  | -0.053  | -0.085  | 0.062   | -0.317  | -0.258  | -0.262  | -0.844  | -0.790  | -0.650  | 0.278   | -5.672  | -0.532  | -0.786  | 1 |
| JW4058 | b4097 | pnhK        | 5  | -0.075  | -0.186  | -0.141  | -0.232  | -0.549  | 0.017   | -0.217  | -0.633  | -1.679  | 0.044   | -0.153  | -0.071  | -0.418  | -0.343  | -0.345  | -0.638  | -0.627  | -0.606  | -0.048  | -1.889  | -0.272  | -0.277  | 1 |
| JW4059 | b4098 | pnhJ        | 5  | -0.095  | -0.270  | -0.022  | -0.188  | -0.403  | 0.013   | -0.199  | -0.468  | -5.257  | 0.081   | -0.219  | 0.059   | -0.155  | -0.030  | -0.153  | -0.292  | -0.178  | -0.208  | -0.109  | -6.551  | -0.243  | -0.325  | 1 |
| JW4060 | b4099 | pnhI        | 5  | -0.082  | -0.696  | -0.173  | -0.206  | -0.485  | 0.051   | -0.453  | -0.569  | -5.886  | -0.080  | -0.423  | -0.318  | -0.329  | -0.325  | -0.512  | -0.376  | -0.267  | -0.484  | -0.246  | -6.567  | -0.468  | -0.588  | 1 |
| JW4061 | b4100 | pnhH        | 5  | -0.190  | -0.749  | -0.325  | -0.612  | -0.761  | 0.149   | -0.563  | -0.783  | -4.458  | 0.012   | -0.380  | -0.222  | -0.470  | -0.372  | -0.563  | -0.551  | -0.386  | -0.671  | -0.385  | -5.463  | -0.680  | -0.697  | 1 |
| JW4062 | b4101 | pnhG        | 5  | 0.339   | -0.443  | 0.025   | -0.308  | -0.482  | 0.114   | -0.207  | -0.398  | -4.013  | -0.008  | -0.095  | -0.099  | -0.006  | 0.053   | -0.126  | -0.204  | -0.265  | -0.533  | -0.088  | -4.892  | -0.398  | -0.333  | 1 |
| JW4063 | b4102 | pnhF        | 5  | 0.005   | -0.484  | -0.113  | -0.252  | -0.253  | 0.111   | -0.247  | -0.389  | -4.598  | -0.007  | -0.114  | -0.178  | -0.321  | -0.210  | -0.331  | -0.159  | -0.266  | -0.333  | -0.211  | -4.975  | -0.474  | -0.439  | 1 |
| JW4064 | b4103 | (pnhE)      | 11 | -0.203  | -0.250  | 0.108   | -0.488  | -0.901  | -0.029  | -0.212  | -0.716  | -4.148  | -0.092  | -0.331  | -0.507  | -0.227  | -0.189  | -0.182  | -0.497  | -0.509  | -0.512  | -0.135  | -4.952  | -0.415  | -0.355  | 1 |
| JW4065 | b4104 | pnhE        | 11 | -0.125  | -0.287  | 0.074   | -0.143  | -0.120  | 0.050   | -0.217  | -0.235  | -3.874  | -0.070  | -0.201  | 0.006   | -0.227  | -0.098  | -0.108  | -0.152  | 0.160   | -0.187  | 0.023   | -1.611  | -0.165  | -0.111  | 1 |
| JW4066 | b4105 | pnhD        | 11 | -0.004  | -0.249  | -0.049  | -0.150  | -0.312  | 0.204   | -0.033  | -0.319  | -5.705  | -0.110  | -0.068  | -0.177  | -0.074  | 0.041   | -0.083  | -0.211  | -0.075  | -0.195  | -0.032  | -0.257  | -0.265  | -0.187  | 1 |
| JW4067 | b4106 | pnhC        | 11 | -0.461  | -0.265  | 0.002   | -0.111  | -0.064  | 0.166   | -0.147  | -0.136  | -3.898  | -0.323  | -0.345  | -0.397  | -0.298  | -0.222  | -0.298  | -0.054  | -0.029  | -0.052  | -0.030  | -0.178  | -0.510  | -0.288  | 1 |
| JW4068 | b4107 | pnhB        | 9  | 0.018   | -0.123  | -0.056  | -0.160  | -0.155  | 0.161   | -0.063  | -0.120  | -4.716  | -0.302  | 0.001   | -0.414  | -0.515  | -0.527  | -0.489  | -0.136  | -0.074  | -0.245  | -0.193  | -0.217  | -0.571  | -0.106  | 1 |
| JW4069 | b4108 | pnhA        | 15 | -0.199  | -0.122  | 0.236   | 0.243   | 0.204   | 0.053   | 0.014   | 0.270   | -4.136  | 0.087   | 0.063   | 0.202   | -0.128  | -0.151  | -0.107  | 0.320   | 0.486   | 0.318   | -0.003  | 0.142   | 0.045   | 0.109   | 1 |
| JW4070 | b4109 | yjdA        | 15 | 0.103   | 0.007   | 0.258   | 0.209   | 0.077   | 0.102   | 0.043   | 0.087   | -6.694  | 0.017   | -0.001  | 0.177   | 0.130   | 0.123   | 0.172   | 0.142   | 0.229   | 0.278   | 0.179   | 0.113   | 0.140   | 0.066   | 1 |
| JW4071 | b4110 | yjcZ        | 15 | -0.029  | -0.107  | -0.058  | 0.053   | -0.020  | 0.304   | -0.166  | -0.047  | -5.314  | -0.337  | -0.009  | 0.174   | -0.042  | 0.073   | -0.044  | -0.005  | 0.032   | -0.039  | -0.133  | -0.064  | -0.070  | -0.033  | 1 |
| JW4072 | b4111 | proP        | 11 | 0.079   | -0.085  | 0.049   | 0.112   | 0.068   | 0.252   | 0.067   | 0.107   | -6.118  | 0.050   | 0.017   | 0.153   | 0.093   | 0.245   | 0.174   | 0.272   | 0.208   | 0.237   | -0.041  | 0.039   | 0.101   | 0.189   | 1 |
| JW4073 | b4112 | basS        | 13 | 0.174   | 0.075   | 0.275   | 0.210   | 0.090   | 0.228   | 0.163   | 0.239   | -5.615  | 0.022   | 0.035   | 0.064   | 0.115   | 0.250   | 0.163   | 0.335   | 0.311   | 0.196   | 0.105   | 0.159   | 0.123   | 0.104   | 1 |
| JW4074 | b4113 | basR        | 9  | -0.178  | -0.091  | -0.035  | -0.249  | -0.601  | -0.025  | -0.070  | -0.614  | -3.792  | 0.017   | -0.087  | 0.268   | 0.110   | -0.205  | 0.157   | -0.561  | -0.557  | -0.584  | -0.041  | 0.090   | 0.100   | 0.209   | 1 |
| JW4075 | b4114 | yjdB        | 15 | -0.200  | -0.029  | 0.127   | -0.305  | -0.828  | 0.252   | 0.059   | -0.788  | -6.415  | 0.133   | 0.011   | 0.274   | 0.062   | 0.161   | 0.092   | -0.793  | -0.682  | -0.724  | 0.026   | Invalid | -0.320  | 0.118   | 1 |
| JW4076 | b4115 | yjdE        | 15 | Invalid | 1 |
| JW4077 | b4116 | adiY        | 9  | 0.090   | 0.146   | 0.075   | 0.005   | 0.049   | 0.280   | 0.208   | 0.085   | -5.658  | 0.123   | 0.043   | 0.199   | 0.025   | 0.243   | 0.161   | 0.103   | 0.074   | 0.215   | -0.001  | 0.182   | 0.283   | 0.220   | 1 |
| JW4078 | b4117 | adi         | 5  | 0.103   | 0.202   | 0.371   | 0.323   | 0.433   | 0.300   | 0.240   | 0.362   | -6.745  | 0.017   | 0.042   | 0.061   | 0.192   | 0.139   | 0.134   | 0.465   | 0.376   | 0.465   | 0.323   | 0.105   | 0.210   | 0.130   | 1 |
| JW4079 | b4118 | melR        | 6  | -0.059  | 0.230   | 0.190   | 0.142   | 0.219   | 0.230   | 0.223   | 0.241   | -5.720  | 0.110   | 0.099   | 0.148   | 0.000   | 0.052   | 0.040   | 0.370   | 0.256   | 0.309   | 0.086   | 0.227   | 0.250   | 0.306   | 1 |
| JW4080 | b4119 | melA        | 6  | -0.390  | -0.029  | 0.182   | 0.101   | -0.099  | 0.141   | 0.004   | -0.049  | -5.995  | 0.058   | 0.060   | 0.157   | -0.046  | 0.016   | 0.063   | -0.096  | 0.079   | -0.022  | 0.013   | 0.205   | 0.117   | 0.067   | 1 |
| JW4081 | b4120 | melB        | 11 | -0.078  | 0.063   | 0.077   | -0.716  | -3.844  | 0.225   | 0.057   | -3.700  | -6.713  | 0.129   | 0.096   | 0.246   | 0.070   | 0.150   | 0.177   | -3.822  | -3.425  | -3.635  | -0.057  | 0.125   | 0.209   | 0.192   | 1 |
| JW4082 | b4121 | yjdF        | 15 | -0.044  | -0.122  | -0.007  | 0.057   | -0.249  | 0.330   | -0.040  | -0.225  | -4.741  | -0.039  | 0.027   | 0.035   | -0.078  | -0.025  | -0.038  | -0.278  | -0.347  | 0.018   | -0.097  | -0.271  | 0.147   | 0.072   | 1 |
| JW4083 | b4122 | fumB        | 6  | 0.092   | 0.080   | 0.262   | 0.345   | 0.222   | 0.428   | 0.143   | 0.273   | -2.997  | 0.036   | 0.089   | 0.136   | 0.022   | 0.116   | 0.062   | 0.221   | 0.040   | 0.237   | 0.148   | 0.059   | 0.127   | 0.101   | 1 |
| JW4084 | b4123 | dcbB        | 11 | 0.072   | 0.040   | 0.136   | 0.312   | 0.267   | 0.334   | 0.183   | 0.427   | -5.903  | 0.099   | 0.003   | 0.133   | 0.134   | 0.264   | 0.199   | 0.345   | 0.257   | 0.440   | 0.033   | 0.203   | 0.201   | 0.237   | 1 |
| JW4085 | b4124 | dcbR        | 9  | 0.045   | 0.076   | 0.077   | 0.229   | 0.125   | 0.402   | 0.066   | 0.144   | -4.548  | 0.089   | -0.049  | 0.134   | -0.033  | 0.075   | 0.076   | 0.152   | 0.025   | 0.151   | -0.035  | -0.069  | 0.116   | 0.277   | 1 |
| JW4086 | b4125 | dcbS        | 9  | -0.285  | -0.014  | 0.046   | 0.205   | 0.280   | 0.320   | -0.046  | 0.314   | -5.802  | 0.036   | -0.104  | 0.136   | -0.053  | -0.043  | 0.059   | 0.095   | 0.105   | 0.264   | 0.044   | -0.027  | -0.031  | 0.124   | 1 |
| JW4087 | b4126 | yjdI        | 15 | -0.001  | -0.001  | 0.069   | 0.267   | 0.357   | 0.242   | -0.029  | 0.293   | -3.569  | 0.059   | -0.094  | 0.043   | -3.632  | -3.358  | -2.987  | 0.235   | 0.169   | 0.408   | -0.073  | -0.425  | -3.042  | 0.198   | 1 |
| JW4088 | b4127 | yjdJ        | 15 | 0.152   | -0.010  | -0.075  | 0.200   | 0.347   | 0.384   | -0.018  | 0.380   | -3.547  | -0.049  | -0.040  | -2.828  | -3.709  | -3.341  | -3.288  | 0.192   | 0.065   | 1.006   | -0.081  | -4.037  | -4.031  | -0.023  | 1 |
| JW4089 | b4128 | yjdK        | 15 | -0.081  | -0.143  | -0.090  | 0.098   | 0.292   | 0.516   | -0.055  | 0.570   | -3.321  | -0.006  | -1.528  | -0.926  | -3.417  | -2.981  | -3.156  | 0.388   | 0.277   | 0.531   | -0.104  | -3.617  | -3.432  | -0.138  | 1 |
| JW4090 | b4129 | lysU        | 12 | -0.123  | -0.014  | 0.008   | 0.157   | 0.320   | 0.368   | 0.035   | 0.314   | -3.809  | 0.120   | -3.964  | 0.046   | -3.840  | -3.820  | -3.915  | 0.247   | 0.185   | 0.386   | -0.084  | -4.411  | -4.324  | 0.172   | 1 |
| JW4091 | b4130 | yjdL        | 15 | -0.014  | 0.091</ |         |         |         |         |         |         |         |         |         |         |         |         |         |         |         |         |         |         |         |         |   |



|        |       |       |    |        |        |        |        |        |        |        |        |        |        |        |        |        |        |        |        |        |        |        |         |         |        |   |   |
|--------|-------|-------|----|--------|--------|--------|--------|--------|--------|--------|--------|--------|--------|--------|--------|--------|--------|--------|--------|--------|--------|--------|---------|---------|--------|---|---|
| JW4136 | b4178 | yjeB  | 15 | 0.255  | 0.186  | 0.256  | 0.142  | 0.241  | 0.276  | 0.197  | 0.305  | 0.235  | 0.114  | 0.118  | 0.186  | 0.244  | 0.316  | 0.208  | 0.411  | 0.397  | 0.511  | 0.139  | 0.206   | 0.334   | 0.239  |   |   |
| JW4137 | b4179 | vacB  | 15 | 0.053  | 0.161  | 0.232  | 0.168  | 0.353  | 0.190  | 0.089  | 0.211  | 0.245  | -0.145 | 0.064  | -0.021 | 0.029  | -0.020 | -0.013 | 0.268  | 0.233  | 0.158  | 0.206  | 0.185   | 0.086   | 0.148  |   | 1 |
| JW4138 | b4180 | yjfH  | 15 | -0.413 | -0.103 | 0.071  | 0.084  | 0.145  | 0.195  | -0.128 | 0.025  | 0.138  | -0.026 | 0.085  | 0.250  | -0.102 | -0.109 | -0.082 | -0.115 | 0.059  | 0.034  | -0.030 | 0.021   | -0.057  | -0.144 |   | 1 |
| JW4139 | b4181 | yjfI  | 15 | -0.214 | -0.101 | -0.156 | -0.224 | 0.147  | 0.151  | -0.064 | -0.133 | 0.067  | -0.068 | 0.017  | 0.238  | -1.999 | -0.070 | 0.141  | -0.272 | -0.189 | -0.116 | -0.164 | -4.077  | -0.056  | -4.516 |   | 1 |
| JW4140 | b4182 | yjfJ  | 15 | -0.014 | 0.139  | 0.246  | 0.100  | 0.268  | 0.209  | 0.167  | 0.059  | 0.134  | 0.057  | 0.056  | 0.307  | 0.039  | 0.212  | 0.159  | -0.050 | 0.155  | 0.225  | 0.197  | -4.452  | 0.273   | -4.366 |   | 1 |
| JW4141 | b4183 | yjfK  | 15 | 0.060  | 0.007  | 0.026  | -0.146 | 0.197  | 0.278  | 0.042  | -0.335 | -0.127 | 0.015  | 0.064  | 0.247  | 0.023  | 0.113  | 0.098  | -0.313 | -0.190 | -0.230 | -0.006 | -4.828  | 0.195   | -4.773 |   | 1 |
| JW4142 | b4184 | yjfL  | 15 | -0.143 | -0.099 | -0.115 | -0.367 | 0.004  | 0.295  | 0.153  | -0.646 | -0.425 | 0.132  | 0.110  | 0.215  | -0.177 | 0.046  | -0.042 | -0.525 | -0.557 | -0.326 | -0.183 | -0.658  | -0.007  | -4.170 |   | 1 |
| JW4143 | b4185 | yjfM  | 15 | -0.176 | -0.256 | -0.067 | -0.446 | -0.253 | 0.237  | -0.247 | -0.397 | -0.254 | 0.030  | 0.001  | 0.042  | -0.228 | -0.084 | -0.177 | -0.274 | -0.362 | -0.328 | -0.543 | -0.293  | -0.070  | -0.182 |   | 1 |
| JW4144 | b4186 | yjfC  | 15 | 0.050  | -0.157 | -0.154 | -0.029 | 0.029  | 0.094  | -0.110 | 0.130  | 0.178  | -0.145 | -0.080 | -0.079 | -0.140 | -0.145 | -0.180 | 0.189  | 0.082  | -0.028 | -0.099 | -0.136  | -0.056  | -0.126 |   | 1 |
| JW4145 | b4187 | ai30B | 10 | -0.388 | -0.246 | 0.030  | 0.125  | 0.234  | 0.202  | -0.156 | 0.118  | 0.023  | -0.081 | 0.054  | 0.187  | -0.078 | -0.055 | -0.185 | -0.120 | 0.039  | -0.010 | -0.055 | -0.084  | -0.113  | -0.126 |   | 1 |
| JW4146 | b4188 | yjfN  | 15 | -0.042 | 0.161  | 0.225  | 0.177  | 0.194  | 0.144  | 0.030  | 0.181  | 0.222  | 0.106  | 0.091  | 0.298  | 0.146  | 0.215  | 0.156  | 0.299  | 0.352  | 0.445  | 0.068  | 0.190   | 0.203   | 0.163  |   | 1 |
| JW4147 | b4189 | yjfO  | 15 | -0.056 | 0.116  | 0.096  | 0.217  | 0.136  | 0.200  | 0.064  | 0.164  | 0.292  | 0.165  | 0.155  | 0.347  | 0.125  | 0.234  | 0.168  | 0.371  | 0.399  | 0.363  | -0.020 | 0.255   | 0.278   | 0.282  |   | 1 |
| JW4148 | b4190 | yjfP  | 15 | 0.117  | -0.036 | 0.115  | 0.181  | 0.292  | 0.102  | -0.019 | 0.004  | -0.051 | -0.013 | 0.046  | 0.175  | 0.063  | 0.055  | 0.028  | 0.126  | 0.127  | 0.101  | 0.025  | -0.040  | 0.162   | 0.065  |   | 1 |
| JW4149 | b4191 | yjfQ  | 15 | 0.266  | 0.074  | 0.139  | 0.081  | 0.089  | 0.199  | 0.056  | 0.161  | 0.072  | -0.089 | -0.026 | 0.025  | 0.168  | 0.292  | 0.175  | 0.181  | 0.206  | 0.262  | 0.037  | 0.130   | -0.006  | 0.134  |   | 1 |
| JW4150 | b4192 | yjfR  | 15 | 0.052  | -0.268 | -0.181 | -0.196 | -0.014 | 0.001  | -0.176 | -0.478 | -0.415 | -0.713 | -0.126 | -0.149 | -0.129 | -0.111 | -0.156 | -0.416 | -0.483 | -0.505 | -0.245 | -0.220  | 0.115   | -0.246 |   | 1 |
| JW4151 | b4193 | sgaT  | 11 | -0.063 | -0.338 | -0.341 | -0.367 | -0.105 | -0.185 | -0.288 | -0.303 | -0.304 | -0.350 | -0.278 | -0.310 | -0.208 | -0.263 | -0.272 | -0.343 | -0.101 | -0.465 | -0.431 | -0.261  | -0.379  |        | 1 |   |
| JW4152 | b4194 | sgaB  | 14 | 0.054  | -0.280 | -0.807 | -0.569 | 0.008  | -0.002 | -0.669 | -0.541 | -0.608 | -0.269 | -0.275 | -0.056 | -0.152 | -0.067 | -0.204 | -0.512 | -0.143 | -0.425 | -0.864 | -0.271  | -0.445  | -0.269 |   | 1 |
| JW4153 | b4195 | sgaA  | 14 | 0.033  | -0.712 | -0.827 | -0.663 | -0.515 | -0.634 | -0.543 | -0.444 | -0.414 | -0.753 | -0.691 | -0.692 | -0.789 | -0.719 | -0.749 | -0.361 | -0.003 | -0.515 | -0.705 | -0.772  | -0.143  | -0.612 |   | 1 |
| JW4154 | b4196 | sgaH  | 14 | -0.010 | -0.345 | -0.637 | -0.371 | -0.119 | -0.328 | -0.489 | -0.020 | -0.237 | -0.532 | -0.491 | -0.505 | -0.616 | -0.641 | -0.577 | -0.150 | 0.005  | -0.232 | -0.609 | -0.648  | -0.497  | -0.590 |   | 1 |
| JW4155 | b4197 | sgaU  | 14 | -0.067 | -0.218 | -0.066 | -0.149 | 0.137  | -0.080 | -0.172 | -0.168 | -0.454 | -0.287 | 0.023  | -0.420 | -0.363 | -0.383 | -0.407 | -0.092 | -0.280 | -0.098 | -0.268 | -0.252  | -0.243  |        | 1 |   |
| JW4156 | b4198 | sgaE  | 14 | -0.476 | -0.433 | -0.471 | -0.355 | -0.233 | -0.193 | -0.437 | -0.354 | -0.418 | -0.461 | -0.410 | -0.046 | -0.531 | -0.384 | -0.459 | -0.413 | -0.354 | -0.347 | -0.500 | -0.455  | -0.523  | -0.440 |   | 1 |
| JW4157 | b4199 | yjfY  | 15 | 0.222  | -0.013 | -0.118 | 0.006  | 0.264  | -0.052 | 0.041  | 0.246  | 0.094  | -0.413 | 0.015  | 0.009  | 0.025  | 0.098  | -0.042 | 0.194  | 0.255  | 0.162  | -0.139 | 0.197   | -0.057  | 0.028  |   | 1 |
| JW4158 | b4200 | rpsF  | 12 | 0.064  | -0.015 | 0.316  | 0.209  | 0.167  | -0.007 | 0.160  | 0.270  | 0.276  | 0.043  | 0.042  | 0.059  | 0.048  | 0.135  | 0.020  | 0.324  | 0.257  | 0.242  | 0.238  | 0.204   | 0.124   | 0.229  |   | 1 |
| JW4159 | b4201 | prfB  | 10 | -0.267 | -0.048 | 0.007  | -0.119 | 0.021  | -0.240 | 0.042  | 0.112  | -0.034 | -0.155 | -0.056 | -0.189 | -0.082 | 0.033  | -0.123 | 0.081  | 0.170  | 0.240  | -0.069 | -0.124  | 0.090   | -0.060 |   | 1 |
| JW4160 | b4202 | rpsR  | 12 | 0.147  | 0.153  | 0.182  | 0.143  | 0.385  | 0.038  | 0.400  | 0.311  | 0.318  | 0.002  | 0.048  | 0.112  | 0.058  | 0.103  | 0.115  | 0.080  | 0.319  | 0.364  | -0.055 | 0.133   | 0.270   | 0.286  |   | 1 |
| JW4161 | b4203 | rplI  | 12 | 0.200  | 0.188  | 0.366  | 0.257  | 0.253  | 0.081  | 0.205  | 0.272  | 0.290  | 0.015  | 0.127  | 0.214  | 0.248  | 0.266  | 0.153  | 0.432  | 0.390  | 0.436  | 0.268  | 0.221   | 0.279   | 0.146  |   | 1 |
| JW4162 | b4204 | yjfZ  | 15 | 0.084  | -0.207 | -5.421 | -5.475 | -5.261 | -5.638 | -4.198 | -5.195 | -4.728 | -4.798 | -4.327 | -4.550 | -5.100 | -4.566 | -4.462 | -5.009 | -4.828 | -5.283 | -4.883 | -0.213  | 0.028   | -4.772 |   | 1 |
| JW4163 | b4205 | ytfA  | 15 | -0.034 | -0.063 | 0.244  | -0.086 | -0.042 | -0.178 | 0.155  | -0.127 | 0.143  | -0.047 | 0.206  | -0.014 | -0.124 | -0.051 | -0.014 | 0.080  | -0.072 | 0.255  | 0.064  | -0.104  | 0.029   | 0.021  |   | 1 |
| JW4164 | b4206 | ytfB  | 15 | -0.169 | 0.005  | 0.080  | 0.028  | 0.243  | -0.154 | -0.033 | 0.109  | 0.142  | -0.209 | -0.174 | 0.116  | -0.105 | -0.063 | 0.078  | -0.039 | 0.022  | 0.119  | -0.013 | -0.308  | -0.267  | 0.040  |   | 1 |
| JW4165 | b4207 | flkIb | 15 | -0.009 | 0.030  | 0.094  | 0.011  | 0.181  | -0.154 | 0.011  | -0.005 | 0.084  | -0.160 | -0.152 | 0.093  | -0.036 | 0.107  | 0.067  | -0.074 | 0.130  | 0.167  | 0.023  | -0.058  | 0.063   | 0.075  |   | 1 |
| JW4166 | b4208 | cycA  | 11 | 0.096  | -0.205 | -0.030 | -0.099 | 0.018  | -0.111 | -0.093 | -0.146 | -0.169 | -0.207 | -0.242 | 0.038  | -0.092 | -0.029 | -0.123 | -0.119 | -0.139 | -0.089 | -0.164 | -0.083  | -0.096  | 0.018  |   | 1 |
| JW4167 | b4209 | ytfE  | 15 | -0.056 | -0.144 | -0.022 | -0.058 | 0.101  | -0.112 | -0.016 | 0.029  | -0.014 | -0.188 | -0.095 | -0.011 | -0.079 | 0.038  | -0.042 | 0.121  | 0.032  | 0.217  | -0.022 | -0.047  | 0.085   | 0.059  |   | 1 |
| JW4168 | b4210 | ytfF  | 11 | -0.202 | -0.218 | 0.018  | 0.057  | -0.063 | -0.112 | -0.112 | -0.090 | 0.002  | -0.356 | -0.234 | -0.040 | -0.301 | -0.178 | -0.241 | -0.053 | 0.023  | -0.014 | -0.101 | -0.106  | -0.080  | -0.133 |   | 1 |
| JW4169 | b4211 | ytfG  | 15 | -0.079 | -0.144 | -0.171 | -0.070 | 0.172  | -0.308 | -0.292 | -0.142 | -0.129 | -0.371 | -0.277 | -0.139 | -0.027 | 0.018  | -0.056 | -0.177 | -0.169 | 0.008  | -0.306 | -0.027  | -0.089  | -0.031 |   | 1 |
| JW4170 | b4212 | ytfH  | 15 | 0.253  | 0.048  | -0.058 | 0.134  | 0.344  | 0.171  | -0.126 | 0.292  | 0.091  | -0.163 | -0.117 | 0.108  | -0.137 | 0.013  | -0.137 | 0.014  | 0.267  | 0.082  | -0.157 | 0.184   | 0.069   | -0.123 |   | 1 |
| JW4171 | b4213 | cpdB  | 8  | -0.038 | -0.176 | -0.062 | 0.063  | -0.111 | -0.266 | 0.019  | 0.133  | 0.121  | -0.213 | -0.076 | -0.082 | -0.096 | 0.002  | -0.109 | 0.273  | 0.165  | 0.187  | -0.151 | -0.151  | -0.089  | -0.097 |   | 1 |
| JW4172 | b4214 | cysC  | 5  | -0.035 | -0.216 | -0.048 | -0.151 | -0.009 | -0.272 | -0.094 | -0.143 | -0.064 | -0.076 | -0.139 | -0.132 | -0.265 | -0.149 | -0.231 | 0.220  | 0.011  | 0.096  | -0.183 | 0.073   | 0.067   | 0.138  |   | 1 |
| JW4173 | b4215 | ytfI  | 15 | -0.085 | -4.384 | -5.206 | -5.150 | -4.909 | -5.167 | -4.110 | -4.769 | -4.077 | -4.620 | -4.255 | -4.278 | -4.707 | -4.441 | -4.331 | -4.732 | -4.370 | -4.686 | -4.494 | -1.232  | -0.817  | -0.332 |   | 1 |
| JW4175 | b4216 | ytfJ  | 15 | -0.184 | -0.313 | -0.345 | -0.341 | 0.023  | -0.228 | -0.152 | -0.042 | -0.112 | -0.185 | -0.388 | -0.118 | -0.160 | -0.032 | -0.124 | 0.089  | 0.044  | 0.090  | -0.429 | -0.078  | 0.104   | 0.097  |   | 1 |
| JW4176 | b4217 | ytfK  | 15 | -0.016 | 0.042  | 0.097  | 0.014  | 0.158  | -0.076 | 0.032  | 0.196  | 0.207  | -0.008 | 0.004  | 0.192  | 0.035  | 0.155  | 0.099  | 0.253  | 0.284  | 0.273  | 0.001  | 0.091   | 0.206   | 0.128  |   | 1 |
| JW4177 | b4218 | ytfL  | 15 | -0.001 | 0.022  | 0.180  | 0.178  | 0.220  | 0.018  | 0.096  | 0.129  | 0.144  | 0.052  | 0.019  | 0.341  | 0.174  | 0.300  | 0.165  | 0.266  | 0.154  | 0.291  | 0.016  | Invalid | Invalid | 0.195  |   | 1 |
| JW4178 | b4219 | mrsA  | 13 | -0.008 | 0.150  | 0.184  | 0.177  | 0.190  | -0.082 | 0.047  | -0.051 | 0.202  | 0.119  | 0.042  | 0.244  | 0.148  | 0.195  | 0.193  | 0.195  | 0.145  | 0.159  | 0.103  | 0.140   | 0.247   | 0.194  |   | 1 |
| JW4179 | b4220 | ytfM  | 15 | 0.070  | -0.095 | 0.034  | -0.037 | 0.001  | -0.140 | -0.042 | -0.051 | -0.081 | -0.170 | -0.170 | 0.000  | -0.018 | 0.045  | -0.021 | -0.042 | -0.040 | 0.035  | -0.107 | -0.053  | 0.026   | -0.073 |   | 1 |
| JW4180 | b4221 | ytfN  | 15 | -0.002 | -0.251 | -0.046 | 0.009  | 0.151  | -0.069 | -0.088 | -0.009 | -0.140 | -0.308 | -0.168 | -0.248 | -0.106 | -0.088 | -0.172 | -0.048 | -0.015 | -0.153 | -0.066 | -0.168  | -0.089  | -0.244 |   | 1 |
| JW4181 | b4222 | ytfP  | 15 | 0.206  | 0.076  | 0.206  | 0.211  | 0.154  | -0.021 | 0.168  | 0.206  | 0.423  | -0.025 | -0.006 | 0.065  | 0.122  | 0.059  | 0.398  | 0.364  | 0.266  | 0.056  | 0.137  | 0.067   | 0.104   |        | 1 |   |
| JW4182 | b4223 | yzfA  | 15 | 0.051  | -0.062 | -0.015 | 0.019  | 0.080  | -0.246 | -0.064 | 0.049  | 0.325  | -0.266 | -0.213 | 0.097  | -0.129 | -0.051 | -0.059 | 0.058  | 0.300  | 0.077  | -0.083 | -0.015  | 0.032   | 0.003  |   | 1 |
| JW4183 | b4224 | chnS  | 14 | -0.248 | -      |        |        |        |        |        |        |        |        |        |        |        |        |        |        |        |        |        |         |         |        |   |   |



|                          |       |             |    |         |         |         |         |         |         |         |         |         |         |         |         |         |         |         |         |         |         |         |         |         |         |         |    |      |
|--------------------------|-------|-------------|----|---------|---------|---------|---------|---------|---------|---------|---------|---------|---------|---------|---------|---------|---------|---------|---------|---------|---------|---------|---------|---------|---------|---------|----|------|
| JW4332                   |       | yjiZ        | 15 | 0.012   | -0.327  | -0.270  | -0.233  | -0.357  | -0.281  | -0.171  | -0.136  | -0.077  | -0.480  | -0.208  | -0.151  | -0.171  | -0.038  | -0.126  | -0.055  | -0.151  | -0.111  | -0.255  | -0.095  | -0.141  | -0.208  |         |    |      |
| JW4333                   | b4371 | rsmC / yjiT | 12 | 0.073   | 0.008   | 0.184   | 0.219   | 0.223   | 0.089   | 0.150   | -0.107  | 0.116   | 0.013   | -0.051  | -0.021  | 0.071   | 0.162   | 0.109   | -0.109  | -0.114  | -0.128  | 0.050   | 0.053   | 0.065   | 0.124   |         | 1  |      |
| JW4336                   | b4374 | yjiG        | 15 | 0.076   | -0.038  | 0.077   | 0.019   | 0.184   | -0.076  | -0.001  | 0.061   | 0.129   | -0.040  | -0.078  | 0.181   | 0.011   | 0.094   | 0.090   | 0.122   | 0.214   | 0.217   | 0.044   | 0.002   | 0.092   | 0.151   |         | 1  |      |
| JW4337                   | b4375 | prfC        | 8  | -0.285  | -0.193  | 0.048   | 0.016   | -0.068  | -0.358  | -0.126  | -0.149  | 0.130   | -0.182  | -0.158  | 0.002   | -0.148  | -0.153  | -0.080  | -0.059  | -0.032  | -0.007  | -0.116  | 0.254   | -0.017  | -0.077  |         | 1  |      |
| JW4338                   | b4376 | osmY        | 4  | 0.219   | -0.037  | 0.116   | 0.107   | 0.256   | 0.005   | 0.088   | 0.174   | 0.193   | -0.180  | 0.087   | 0.011   | 0.061   | 0.073   | 0.030   | 0.133   | 0.139   | 0.124   | 0.092   | -0.029  | 0.210   | 0.169   |         | 1  |      |
| JW4340                   | b4377 | yjiU        | 15 | -0.201  | 0.047   | 0.298   | 0.041   | 0.139   | -0.171  | 0.044   | -0.131  | -0.025  | 0.020   | 0.052   | 0.198   | 0.164   | 0.132   | 0.180   | -0.148  | 0.010   | -0.125  | 0.112   | 0.268   | 0.111   | 0.145   |         | 1  |      |
| JW4341                   | b4378 | yjiV        | 15 | -0.169  | -0.250  | -0.198  | 0.017   | -0.143  | -0.413  | -0.307  | -0.001  | -0.003  | -0.358  | -0.284  | -0.144  | -0.080  | -0.062  | -0.153  | 0.050   | 0.069   | 0.027   | -0.278  | -0.090  | -0.180  | -0.220  |         | 1  |      |
| JW4342                   | b4379 | yjiW        | 15 | 0.090   | -0.275  | 0.172   | -0.041  | -0.033  | -0.218  | 0.023   | -0.351  | -0.329  | -0.427  | -0.234  | -0.099  | -0.226  | -0.229  | -0.396  | -0.384  | -0.307  | -0.461  | 0.035   | -0.063  | -0.016  | -0.208  |         | 1  |      |
| JW4344                   | b4381 | deoC        | 8  | 0.105   | -0.070  | -0.097  | -0.008  | 0.076   | -0.178  | -0.066  | 0.047   | 0.078   | -0.114  | -0.095  | -0.130  | -0.008  | 0.085   | 0.016   | 0.199   | 0.115   | 0.104   | -0.192  | 0.046   | 0.049   | 0.017   |         | 1  |      |
| JW4347                   | b4384 | deoD        | 8  | 0.059   | -0.199  | -0.155  | -0.118  | -0.074  | -0.250  | -0.069  | -0.080  | -0.052  | -0.176  | -0.260  | -0.152  | -0.161  | -0.056  | -0.126  | -0.005  | 0.048   | 0.020   | -0.173  | -0.008  | -0.053  | -0.061  |         | 1  |      |
| JW4348                   | b4385 | yjiJ        | 15 | -4.060  | -4.134  | -4.581  | -4.634  | -4.396  | -4.750  | -3.858  | -4.378  | -3.983  | -4.247  | -3.954  | -4.109  | -4.409  | -4.085  | -3.960  | -0.225  | -4.091  | -4.290  | -4.237  | -4.172  | -4.144  | -4.104  | 1       |    |      |
| JW4349                   | b4386 | lplA        | 2  | -0.089  | -0.261  | -0.281  | -0.289  | -0.197  | -0.457  | -0.154  | -0.252  | -0.209  | -0.331  | -0.303  | -0.373  | -0.212  | -0.263  | -0.165  | -0.138  | -0.137  | -0.101  | -0.292  | -0.129  | -0.267  | -0.192  |         | 1  |      |
| JW4350                   | b4387 | smf         | 15 | -0.074  | -0.081  | -0.078  | -0.071  | -0.138  | -0.348  | -0.152  | -0.182  | -0.005  | -0.076  | -0.129  | -0.060  | 0.233   | -0.036  | -0.047  | -0.145  | -0.005  | -0.014  | -0.069  | 0.039   | -0.083  | 0.004   |         | 1  |      |
| JW4351                   | b4388 | serB        | 1  | Invalid |    | 1    |
| JW4352                   | b4389 | radA / sms  | 14 | 0.186   | -0.348  | -0.022  | -0.176  | 0.006   | -0.173  | -0.005  | -0.262  | -0.151  | -0.459  | -0.356  | -0.073  | -0.074  | 0.020   | -0.081  | -0.292  | -0.178  | -0.245  | -0.065  | -0.076  | -0.101  | -0.040  |         | 1  |      |
| JW4353                   | b4390 | nadR        | 2  | 0.080   | -0.309  | -0.475  | -0.385  | -0.115  | -0.344  | -0.252  | -0.457  | -0.209  | -0.356  | -0.360  | -0.187  | -0.345  | -0.269  | -0.322  | -0.229  | -0.316  | -0.414  | -0.442  | -0.250  | -0.232  | -0.263  |         | 1  |      |
| JW4354                   | b4391 | yjiK        | 15 | 0.054   | -0.107  | -0.021  | -0.190  | -0.052  | -0.346  | -0.051  | -0.071  | -0.034  | -0.237  | -0.212  | -0.257  | -0.124  | -0.159  | -0.152  | 0.062   | 0.169   | 0.059   | -0.095  | -0.138  | -0.085  | -0.057  |         | 1  |      |
| JW4355                   | b4392 | sif         | 1  | Invalid |    | 1    |
| JW4356                   | b4393 | trpR        | 1  | 0.095   | -0.027  | 0.112   | 0.016   | -0.016  | 0.021   | 0.014   | 0.012   | 0.254   | -0.007  | -0.019  | 0.181   | -0.001  | 0.068   | -0.099  | 0.043   | 0.151   | 0.053   | 0.066   | 0.192   | 0.171   | 0.198   |         | 1  |      |
| JW4357                   | b4394 | yjiX        | 15 | 0.004   | -0.100  | -0.073  | 0.100   | 0.246   | -0.145  | -0.021  | 0.207   | 0.181   | -0.224  | -0.156  | 0.092   | -0.112  | -0.081  | -0.142  | 0.224   | 0.258   | 0.238   | -0.051  | -0.152  | -0.026  | -0.102  |         | 1  |      |
| JW4358                   | b4395 | gpmG        | 10 | 0.172   | 0.016   | 0.150   | 0.047   | -0.017  | -0.028  | 0.085   | 0.119   | 0.065   | -0.015  | 0.015   | 0.073   | 0.075   | 0.146   | 0.100   | 0.129   | 0.138   | 0.176   | 0.151   | 0.161   | 0.190   | 0.158   |         | 1  |      |
| JW4359                   | b4396 | rob         | 13 | -0.004  | 0.076   | 0.134   | -0.058  | -0.084  | -0.068  | 0.179   | -0.035  | 0.032   | 0.024   | -0.035  | -0.061  | 0.078   | 0.105   | 0.064   | 0.159   | 0.121   | 0.290   | 0.092   | 0.100   | 0.104   | 0.171   |         | 1  |      |
| JW4360                   | b4397 | creA        | 9  | -0.364  | -0.148  | -0.014  | -0.152  | -0.109  | -0.355  | -0.080  | -0.162  | 0.056   | -0.066  | -0.071  | 0.072   | -0.118  | -0.105  | 0.003   | -0.008  | -0.020  | 0.005   | -0.165  | 0.099   | 0.010   | 0.012   |         | 1  |      |
| JW4361                   | b4398 | creB        | 9  | -0.409  | -0.318  | -0.240  | -0.243  | -0.352  | -0.503  | -0.309  | -0.287  | -0.244  | -0.401  | -0.315  | -0.190  | -0.269  | -0.176  | -0.242  | -0.252  | -0.144  | -0.164  | -0.359  | -0.194  | -0.190  | -0.146  |         | 1  |      |
| JW4362                   | b4399 | creC        | 9  | -0.228  | -0.288  | -0.230  | 0.073   | 0.201   | -0.399  | -0.247  | 0.239   | 0.185   | -0.369  | -0.277  | -0.162  | -0.195  | -0.155  | -0.241  | 0.084   | 0.066   | 0.079   | -0.316  | -0.227  | -0.157  | -0.171  |         | 1  |      |
| JW4363                   | b4400 | creD        | 11 | 0.023   | -0.102  | -0.124  | 0.098   | 0.197   | 0.078   | -0.015  | 0.183   | 0.222   | -0.143  | -0.067  | -0.082  | -0.060  | 0.043   | -0.032  | 0.072   | 0.024   | 0.084   | -0.185  | -0.059  | -0.016  | -0.012  |         | 1  |      |
| JW4366                   | b4403 | lasT        | 15 | 0.006   | 0.006   | -0.063  | -0.021  | 0.105   | -0.013  | -0.049  | 0.066   | 0.268   | -0.114  | -0.078  | -0.118  | -0.120  | -0.037  | -0.011  | 0.209   | 0.143   | 0.196   | -0.144  | -0.092  | 0.047   | -0.017  |         | 1  |      |
| Number of absent CDSs    |       |             |    | 425     | 293     | 401     | 457     | 602     | 218     | 338     | 578     | 698     | 230     | 286     | 382     | 522     | 561     | 493     | 598     | 595     | 617     | 290     | 716     | 533     | 613     | 1424    | 96 | 2586 |
| Number of conserved CDSs |       |             |    | 3609    | 3741    | 3633    | 3570    | 3432    | 3813    | 3696    | 3456    | 3335    | 3804    | 3748    | 3652    | 3511    | 3473    | 3541    | 3436    | 3436    | 3416    | 3744    | 3288    | 3474    | 3418    |         |    |      |
| Number of invalid data   |       |             |    | 37      | 37      | 37      | 44      | 37      | 40      | 37      | 37      | 38      | 37      | 37      | 37      | 38      | 37      | 37      | 37      | 40      | 38      | 37      | 67      | 64      | 40      |         |    |      |

Names of absent gene at least one strain are colored blue.  
Names of commonly absent genes are colored orange.  
Names of putative duplicated genes are colored red.  
Invalid data cell are colored grey.

| Functions                                              |    |
|--------------------------------------------------------|----|
| Amino acid metabolism                                  | 1  |
| Biosynthesis of cofactors, prosthetic groups, carriers | 2  |
| Cell envelope                                          | 3  |
| Cellular process                                       | 4  |
| Central intermediary metabolism                        | 5  |
| Energy metabolism                                      | 6  |
| Fatty acid, phospholipid metabolism                    | 7  |
| Nucleotide metabolism                                  | 8  |
| Regulatory functions                                   | 9  |
| Replication                                            | 10 |
| Transport and binding protein                          | 11 |
| Translation                                            | 12 |
| Transcription                                          | 13 |
| Other categories                                       | 14 |
| Hypothetical                                           | 15 |
